# Supplementary material for: G protein subunit Gγ13-mediated signaling pathway is critical to the inflammation resolution and functional recovery of severely injured lungs
Source: eLife. 2024 Jun 5;12:RP92956. doi: 10.7554/eLife.92956 (PMC11152575; doi:10.7554/eLife.92956)
Supplement: Figure 1—source data 1. [file elife-92956-fig1-data1.xlsx]

## Sheet: Body weight change(%)
Body weight change(%)
day	Control							H1N1 Infected
0	100	100	100	100	100	100		100	100	100	100	100	100
2	103.94	101.14	98.7	104.97	102.92	106		97.43	99.71	99.86	100.78	98.64	99.86
5	104.76	104.6	103.35	103.76	102.81	103.86		93.09	97.97	95.16	98.26	94.89	95.16
6	104.98	105.14	102.89	100.94	103.49	104.23		87.31	93.11	84.58	91	89.22	84.58
8	105.18	105.37	104.5	101.81	105.1	104.47		71.9	77.87	81.02	76.83	77.51	81.02
9	102.42	107.44	103.75	102.42	107.34	105.39		72.16	74.45	81.59	82.23	75.54	81.59
10	108.72	105.79	105.98	108.72	110.73	107.06		79.71	76.66	80.02	95.5	87.37	97.72
13	111.13	104.43	106.8	109.13	112.71	108.91		92.67	87.29	91.65	101.32	95.01	102.42
15	118.93	107.14	111.28	113.69	111.46	111.74		94.75	93.68	94.63	106.42	100.99	103.42
25	124.97	110.15	116.1	115.37	114.11	111.13		101.07	101	101.3	115.07	108.56	109.11
