# Supplementary material for: G protein subunit Gγ13-mediated signaling pathway is critical to the inflammation resolution and functional recovery of severely injured lungs
Source: eLife. 2024 Jun 5;12:RP92956. doi: 10.7554/eLife.92956 (PMC11152575; doi:10.7554/eLife.92956)
Supplement: Figure 2—source data 1. [file elife-92956-fig2-data1.xlsx]

## Sheet: Figure 2A
genes	0dpi WT			25dpi WT
Tas2r102	0.988382	0.988382	1.02324	1.30418		1.05932
Tas2r105	0.988382	0.988382	1.02324	2.57244	3.10187	4.23728
Tas2r106	0.988382	0.988382	1.02324	1.01617	1.36902
Tas2r108	0.407337	1.27836	1.3143	7.91339	9.2811	7.33245
Tas2r115	0.988382	0.988382	1.02324	1.93608	1.20009
Tas2r118	0.988382	0.988382	1.02324	2.85431	3.14517	2.64477
Tas2r122	0.279482	1.07239	1.64813	0.310105	0.119977	0.159412
Tas2r125	0.988382	0.988382	1.02324	0.884626	0.579604
Tas2r129	1.1838	0.85466	0.961542	0.540896	3.30219
Tas2r135	1.03882	1.07545	0.885732	0.274512	0.261511	0.302486
Tas2r137	0.988382	0.988382	1.02324	3.51406	3.56312	5.18067
Tas2r138	1	1	0	6.9644	5.27803	6.32033
Tas2r143	1.13501	0.89051	0.97448	0.483874	0.356681	0.430088

## Sheet: Figure 2C
	▵F/F0
Time(s)	C1	C2	C3	C4
0.331126	-0.0085835	0.0295741	0.00564329	-0.0038276
0.662252	0.00287665	-0.0085806	0.011856	-0.0039775
0.993377	-0.0036648	-0.0118902	0.0101521	-0.0013844
1.3245	-0.0062103	-0.0007719	0.00122095	-0.0072517
1.65563	-0.0060808	-0.0264677	0.00985222	-0.0068244
1.98675	-0.003493	-0.0071933	0.0100033	-0.0055683
2.31788	-0.0015567	-0.0237703	0.00191819	-0.0068705
2.64901	-0.0061662	-0.014986	0.0147669	-0.0060431
2.98013	-0.0095288	0.00555493	0.00102233	-0.0054706
3.31126	-0.00804	-0.0310947	0.00852669	-0.0065922
3.64238	-0.0074143	0.00855333	0.00954205	-0.0074329
3.97351	-0.0094742	-0.0369156	0.0142733	-0.000188
4.30464	-0.0046973	0.0306821	0.00444567	-0.0061389
4.63576	-6.35e-05	-0.0069011	0.0187189	0.00471055
4.96689	0.00210048	0.0081549	0.010319	0.0064632
5.29801	-0.0015686	0.0188034	0.0102472	0.00571389
5.62914	-0.0039432	-0.007727	0.00946848	0.00609235
5.96026	-0.0021712	0.0235758	0.00815857	0.00920855
6.29139	-0.0051783	0.0204757	0.00975083	-0.0004428
6.62252	-0.0009622	-0.0057276	0.013335	0.0110856
6.95364	-0.004738	-0.0010264	0.00808288	0.00865364
7.28477	-0.0066973	0.00010198	0.00933761	0.0036313
7.61589	-0.0001445	-0.0128615	0.00724377	0.00474723
7.94702	-0.0012786	0.00518123	0.00395426	0.00346155
8.27815	-0.0012499	-0.0330331	0.0113592	0.00707967
8.60927	-0.0037421	-0.0409886	0.00128777	-0.0028897
8.9404	-0.0035024	-0.0156011	0.00679608	-0.0028806
9.27152	-0.008585	0.0139336	-0.0033435	0.00332876
9.60265	-0.0108785	0.00616567	-0.0010239	-0.0004577
9.93377	-0.0093041	-0.0115702	-0.000556	0.0010815
10.2649	-0.0030966	0.00070835	-0.0017053	-0.0010168
10.596	-0.0090506	-0.0378215	-0.0109215	0.0147214
10.9272	-0.0066085	0.0114209	-0.0005309	0.0160821
11.2583	-0.0048438	-0.0268312	-0.0047034	0.0186712
11.5894	-0.0031099	0.0168564	-0.0082262	0.0154927
11.9205	-0.0057148	-0.0125779	-0.007439	0.0204747
12.2517	-0.0034072	-0.009994	-0.0084929	0.0197216
12.5828	-0.0073399	-0.0040932	-0.0078258	0.0187569
12.9139	0.00088154	0.00565091	-0.0071085	0.0218327
13.245	0.00134747	-0.0038881	-0.005578	0.0143676
13.5762	-0.0012477	-0.005066	-0.0085031	0.0198663
13.9073	0.00270699	0.00279065	-0.0049594	0.022092
14.2384	0.00056703	-0.0070465	-0.0066955	0.00890652
14.5695	-0.0008546	0.00670224	-0.0085814	0.0227059
14.9007	0.00860726	0.0197501	-0.0068556	0.0246027
15.2318	0.00893375	-0.0107632	0.00280591	0.0257364
15.5629	0.00676944	0.0147682	-0.0028284	0.0256722
15.894	0.00683279	0.0165728	-0.0063866	0.0266506
16.2252	0.00457423	-0.0097395	-0.0125378	0.0293833
16.5563	0.00863967	0.00167243	-0.012123	0.0229943
16.8874	0.0125081	0.0152539	-0.0140842	0.0294147
17.2185	0.00649216	-0.0113623	-0.0101862	0.0253558
17.5497	0.00933498	0.0151885	-0.0149405	0.0317407
17.8808	0.0122833	0.00678076	-0.0030939	0.0290092
18.2119	0.0120177	0.0203157	-0.0080378	0.0365721
18.543	0.0184334	0.0279557	-0.0076742	0.0405045
18.8742	0.0163517	0.0355418	-0.0102586	0.0276498
19.2053	0.0151869	0.0267008	-0.0077373	0.0333482
19.5364	0.0124045	0.0211664	-0.0143406	0.0267249
19.8675	0.014341	-0.000263	-0.0068097	0.0318674
20.1987	0.00329713	0.0470003	-0.0092124	0.0373691
20.5298	0.00803826	-0.007823	-0.0132034	0.0285685
20.8609	0.00666485	0.0340237	-0.0165363	0.032904
21.1921	0.0120996	0.0545181	-0.0076957	0.0341474
21.5232	0.0109247	0.0235744	-0.0154814	0.0344038
21.8543	0.0171863	0.0131411	-0.0084901	0.0336557
22.1854	0.0143952	0.0481359	-0.0139369	0.0284714
22.5166	0.0116505	0.0478262	-0.012184	0.0382392
22.8477	0.0185751	0.0239394	-0.0046725	0.0395707
23.1788	0.0217105	0.0487932	-0.0124682	0.0424938
23.5099	0.0198334	0.0285853	-0.0133108	0.0365988
23.8411	0.0269134	0.0492585	-0.0113147	0.0374911
24.1722	0.0259153	0.0639015	-0.0189498	0.0500613
24.5033	0.031377	0.0385009	-0.0103164	0.040924
24.8344	0.0283461	0.0393225	-0.0118446	0.0436075
25.1656	0.0224366	0.0179717	-0.0094437	0.0380955
25.4967	0.0289284	0.014918	-0.0112866	0.0420992
25.8278	0.026901	0.0427237	-0.0098114	0.0504272
26.1589	0.0270252	0.0358646	-0.0071142	0.0416201
26.4901	0.0283803	0.0367473	-0.0063723	0.0455075
26.8212	0.0373067	0.0449282	-0.0044438	0.0489761
27.1523	0.0359557	0.0573304	-0.0033653	0.0566328
27.4834	0.0430167	0.0424198	0.00122123	0.0460202
27.8146	0.0410312	0.0848132	-0.0126132	0.0516084
28.1457	0.0352335	0.0394272	-0.0061151	0.0570452
28.4768	0.0464921	0.069449	0.00225895	0.0457426
28.8079	0.0523108	0.0482625	0.00185506	0.0567841
29.1391	0.053791	0.059798	0.00116309	0.0659202
29.4702	0.0575797	0.0476837	0.25171	0.0710886
29.8013	0.0611406	0.0660842	0.258329	0.0741335
30.1325	0.0584496	0.0287976	0.268739	0.0866923
30.4636	0.0638449	0.046042	0.270794	0.0945097
30.7947	0.152774	0.032398	0.269641	0.0971997
31.1258	0.152951	0.0648176	0.280558	0.0953882
31.457	0.148819	0.106163	0.272816	0.103878
31.7881	0.141187	0.079798	0.278927	0.108246
32.1192	0.140188	0.0537416	0.271301	0.11111
32.4503	0.149806	0.0551332	0.270077	0.119646
32.7815	0.145567	0.0802618	0.269223	0.122441
33.1126	0.147838	0.103867	0.274908	0.144958
33.4437	0.151768	0.0790665	0.278794	0.157232
33.7748	0.148286	0.078745	0.278943	0.167309
34.106	0.152563	0.0764824	0.274461	0.173516
34.4371	0.15601	0.0831648	0.296782	0.17942
34.7682	0.162732	0.100603	0.314911	0.181506
35.0993	0.15737	0.121633	0.33431	0.182798
35.4305	0.157224	0.141112	0.356	0.19557
35.7616	0.161365	0.165447	0.368099	0.194932
36.0927	0.158369	0.203951	0.372778	0.206917
36.4238	0.16381	0.229072	0.36554	0.213339
36.755	0.161535	0.261026	0.376181	0.214052
37.0861	0.167712	0.295967	0.366097	0.22188
37.4172	0.168099	0.332366	0.369243	0.229876
37.7483	0.171952	0.365276	0.369766	0.222666
38.0795	0.179914	0.360564	0.361591	0.238651
38.4106	0.182055	0.389543	0.363066	0.234239
38.7417	0.180777	0.419104	0.391525	0.246387
39.0728	0.176301	0.447821	0.427038	0.248504
39.404	0.176946	0.450356	0.480373	0.255018
39.7351	0.180952	0.46286	0.491205	0.253672
40.0662	0.183475	0.411301	0.494092	0.253126
40.3974	0.179374	0.423213	0.530721	0.266589
40.7285	0.185766	0.410642	0.552165	0.267461
41.0596	0.183723	0.451938	0.584672	0.270815
41.3907	0.186448	0.454275	0.598022	0.287774
41.7219	0.196351	0.44513	0.604531	0.283668
42.053	0.201071	0.442233	0.604926	0.291738
42.3841	0.209188	0.468393	0.611949	0.305273
42.7152	0.210093	0.439725	0.610049	0.313735
43.0464	0.230241	0.446207	0.605654	0.322125
43.3775	0.226145	0.438163	0.610476	0.326861
43.7086	0.230031	0.491049	0.621059	0.328801
44.0397	0.239062	0.479373	0.60869	0.334188
44.3709	0.229869	0.462928	0.610176	0.345381
44.702	0.234591	0.458329	0.632882	0.350489
45.0331	0.232616	0.49645	0.647935	0.364344
45.3642	0.226176	0.496047	0.656144	0.373318
45.6954	0.232134	0.543546	0.647611	0.381718
46.0265	0.247668	0.536014	0.642942	0.392783
46.3576	0.256866	0.539181	0.656876	0.393536
46.6887	0.274019	0.520548	0.663355	0.390829
47.0199	0.284806	0.526033	0.656049	0.398295
47.351	0.302741	0.477373	0.659913	0.418026
47.6821	0.314656	0.507472	0.650373	0.413699
48.0132	0.325853	0.498787	0.67068	0.427147
48.3444	0.334345	0.52613	0.698958	0.434909
48.6755	0.34126	0.471446	0.731164	0.438444
49.0066	0.351161	0.519847	0.759246	0.446294
49.3377	0.372342	0.523217	0.794206	0.447038
49.6689	0.393199	0.481942	0.815948	0.452631
50	0.404297	0.503251	0.83465	0.464329
50.3311	0.41742	0.506869	0.851205	0.470034
50.6623	0.429792	0.552314	0.881087	0.473884
50.9934	0.442413	0.544136	0.900408	0.48166
51.3245	0.449194	0.557657	0.92386	0.489446
51.6556	0.453801	0.523864	0.926623	0.49032
51.9868	0.464278	0.531006	0.947485	0.501027
52.3179	0.475705	0.554468	0.948448	0.514284
52.649	0.488541	0.589173	0.963712	0.521558
52.9801	0.502212	0.581984	0.990077	0.544994
53.3113	0.514916	0.553373	0.988261	0.536962
53.6424	0.528331	0.59882	0.989742	0.549722
53.9735	0.534193	0.582769	0.988757	0.553639
54.3046	0.541716	0.573057	1.00298	0.562682
54.6358	0.540804	0.654282	1.01948	0.567201
54.9669	0.549014	0.604231	1.03274	0.56974
55.298	0.545258	0.628328	1.03203	0.565933
55.6291	0.534094	0.620252	1.05085	0.570399
55.9603	0.542665	0.630686	1.06182	0.578461
56.2914	0.547232	0.640369	1.08692	0.577499
56.6225	0.544063	0.69231	1.08221	0.587501
56.9536	0.550209	0.66052	1.33953	0.589816
57.2848	0.556024	0.645273	1.34135	0.599152
57.6159	0.558399	0.609932	1.38492	0.600007
57.947	0.555975	0.623003	1.37477	0.604132
58.2781	0.567634	0.672214	1.39374	0.613695
58.6093	0.56877	0.684965	1.42026	0.610232
58.9404	0.568832	0.719932	1.42457	0.628511
59.2715	0.575128	0.726838	1.44683	0.629476
59.6026	0.588918	0.724786	1.44405	0.650714
59.9338	0.601928	0.697372	1.46995	0.640925
60.2649	0.615298	0.728698	1.45949	0.655815
60.596	0.615177	0.733368	1.47756	0.65748
60.9272	0.613009	0.683293	1.47511	0.653257
61.2583	0.60732	0.71337	1.48359	0.651445
61.5894	0.594128	0.734165	1.4979	0.665555
61.9205	0.593213	0.725093	1.50081	0.665272
62.2517	0.603186	0.746045	1.51444	0.671867
62.5828	0.605147	0.77861	1.52867	0.683541
62.9139	0.614543	0.769271	1.54268	0.687019
63.245	0.610615	0.787658	1.52094	0.69343
63.5762	0.607887	0.817466	1.54402	0.70402
63.9073	0.598502	0.812859	1.53289	0.718537
64.2384	0.614612	0.880834	1.53646	0.722096
64.5695	0.617119	0.854697	1.5411	0.723276
64.9007	0.613051	0.910056	1.53519	0.736834
65.2318	0.609034	0.890419	1.55133	0.737104
65.5629	0.611347	0.920012	1.55085	0.744944
65.894	0.623432	0.909531	1.5529	0.75665
66.2252	0.631418	0.921389	1.54756	0.768592
66.5563	0.637276	0.950237	1.53725	0.761821
66.8874	0.643677	0.925286	1.55934	0.770188
67.2185	0.64333	1.0324	1.57034	0.777471
67.5497	0.656485	0.979264	1.58637	0.778065
67.8808	0.657328	1.00683	1.59614	0.780503
68.2119	0.67626	1.05854	1.60593	0.783291
68.543	0.68671	1.02222	1.60356	0.791457
68.8742	0.691025	1.09768	1.61368	0.799776
69.2053	0.701281	1.11951	1.60787	0.807449
69.5364	0.704351	1.10698	1.6224	0.804997
69.8675	0.722802	1.08114	1.63128	0.809695
70.1987	0.739925	1.04902	1.62698	0.80516
70.5298	0.745562	1.07228	1.64781	0.801499
70.8609	0.74969	1.08039	1.64751	0.795628
71.1921	0.755596	1.09931	1.65638	0.806963
71.5232	0.75808	1.0807	1.68609	0.839338
71.8543	0.763886	1.06938	1.68903	0.846332
72.1854	0.781533	1.05375	1.70932	0.843519
72.5166	0.794851	1.09733	1.71854	0.846962
72.8477	0.804859	1.13642	1.72668	0.8375
73.1788	0.813015	1.08807	1.72328	0.850761
73.5099	0.822555	1.02563	1.73556	0.86206
73.8411	0.83684	1.086	1.76203	0.875781
74.1722	0.836385	1.09168	1.76386	0.86875
74.5033	0.849864	1.09613	1.75813	0.873762
74.8344	0.859066	1.0575	1.79609	0.854704
75.1656	0.885272	1.04809	1.8076	0.871146
75.4967	0.880831	1.11093	1.82591	0.874551
75.8278	0.883444	1.06047	1.82637	0.879966
76.1589	0.889661	1.06641	1.82591	0.864239
76.4901	0.905873	1.08304	1.83123	0.885381
76.8212	0.919991	1.05218	1.81974	0.8847
77.1523	0.937653	1.08198	1.81986	0.892253
77.4834	0.938483	1.12595	1.82777	0.912464
77.8146	0.950668	1.11373	1.83783	0.933334
78.1457	0.95389	1.02601	1.83963	0.932044
78.4768	0.970057	1.05546	1.82427	0.933356
78.8079	0.971336	1.04231	1.82434	0.933389
79.1391	0.965187	1.05476	1.86415	0.945837
79.4702	0.977005	1.09215	1.86947	0.944452
79.8013	0.982778	1.05006	1.87322	0.961035
80.1325	0.992317	1.03225	1.86277	0.956916
80.4636	1.01701	1.05791	1.85797	0.9563
80.7947	1.01692	1.05793	1.85389	0.95825
81.1258	1.02812	1.03497	1.8669	0.957871
81.457	1.03525	1.04216	1.88566	0.955309
81.7881	1.0464	1.06238	1.90076	0.969111
82.1192	1.05989	1.02775	1.89928	0.980473
82.4503	1.0621	1.08299	1.9224	0.966307
82.7815	1.06435	1.01935	1.91867	0.981721
83.1126	1.07005	1.03057	1.92931	0.986115
83.4437	1.08766	1.02619	1.93576	0.998253
83.7748	1.09089	0.99183	1.95302	1.00577
84.106	1.10296	1.02182	1.95873	1.01866
84.4371	1.10305	1.0191	1.95679	1.0277
84.7682	1.10512	1.00905	1.98207	1.03398
85.0993	1.10765	1.0482	1.96515	1.02521
85.4305	1.10863	0.998457	1.97351	1.03538
85.7616	1.09529	0.980179	1.96251	1.04005
86.0927	1.09911	0.956371	1.98221	1.0533
86.4238	1.09411	0.969419	2.00309	1.06508
86.755	1.10247	0.97138	2.007	1.07891
87.0861	1.09665	0.977818	2.0161	1.07368
87.4172	1.09942	1.00193	2.01611	1.12623
87.7483	1.09641	0.970932	1.99917	1.14142
88.0795	1.08424	0.967639	2.01299	1.13074
88.4106	1.09802	0.972291	2.00894	1.1411
88.7417	1.08764	0.976262	2.00478	1.15023
89.0728	1.09342	0.970031	2.01118	1.17197
89.404	1.0975	0.965204	2.00069	1.18403
89.7351	1.10263	0.955659	2.01692	1.18777
90.0662	1.1013	0.965994	2.01535	1.17501
90.3974	1.09428	0.957261	2.01654	1.18812
90.7285	1.10221	0.944491	2.01067	1.20203
91.0596	1.11182	0.951688	2.01788	1.19594
91.3907	1.10472	0.962746	2.0358	1.21648
91.7219	1.11336	0.942933	1.99835	1.22029
92.053	1.10784	0.946905	2.00179	1.24246
92.3841	1.10743	0.954036	2.00036	1.26924
92.7152	1.114	0.959609	2.01305	1.26926
93.0464	1.10631	0.946159	2.00288	1.2599
93.3775	1.11111	0.954869	2.00339	1.26448
93.7086	1.10107	0.945325	2.00817	1.26135
94.0397	1.11565	0.942889	2.0208	1.25977
94.3709	1.11014	0.950042	2.03899	1.28581
94.702	1.11826	0.941353	2.06125	1.30412
95.0331	1.11823	0.923866	2.06161	1.32811
95.3642	1.13328	0.948506	2.04083	1.34002
95.6954	1.14069	0.929439	2.0292	1.37853
96.0265	1.13609	0.930185	2.01318	1.39359
96.3576	1.13532	0.926323	2.00884	1.42168
96.6887	1.14789	0.932643	1.99174	1.45215
97.0199	1.15795	0.927069	1.9743	1.46182
97.351	1.16308	0.930997	1.98617	1.47792
97.6821	1.16026	0.932664	1.98012	1.49737
98.0132	1.16538	0.931809	1.9693	1.51459
98.3444	1.1482	0.923866	1.98072	1.52765
98.6755	1.15225	0.931875	1.97316	1.55317
99.0066	1.15938	0.934968	1.97514	1.57948
99.3377	1.16006	0.922286	1.98836	1.59343
99.6689	1.16706	0.938984	1.98236	1.60594
100	1.17599	0.91114	1.98488	1.63713
100.331	1.18753	0.906356	1.98256	1.66985
100.662	1.19129	0.913553	1.95956	1.69646
100.993	1.1979	0.938216	1.95746	1.70994
101.325	1.20328	0.919851	1.9684	1.73128
101.656	1.19771	0.913531	1.96388	1.77635
101.987	1.20086	0.913531	1.97826	1.75606
102.318	1.20266	0.907958	1.94662	1.73028
102.649	1.19703	0.90956	1.94668	1.72709
102.98	1.20519	0.89769	1.9562	1.72685
103.311	1.20402	0.910328	1.9411	1.73962
103.642	1.21068	0.897624	1.93609	1.74645
103.974	1.20468	0.904777	1.92859	1.74403
104.305	1.21762	0.912741	1.90924	1.75136
104.636	1.23383	0.903175	1.89537	1.77748
104.967	1.241	0.911118	1.88115	1.77852
105.298	1.23087	0.903263	1.87186	1.78313
105.629	1.22993	0.893718	1.86599	1.78958
105.96	1.22008	0.903219	1.85114	1.76828
106.291	1.21985	0.893718	1.85616	1.76985
106.623	1.2198	0.897602	1.83798	1.75922
106.954	1.21558	0.907146	1.84721	1.74595
107.285	1.22354	0.896088	1.84309	1.74087
107.616	1.22719	0.895232	1.83412	1.73652
107.947	1.23441	0.882572	1.8407	1.73148
108.278	1.22972	0.88255	1.8258	1.74267
108.609	1.2483	0.899247	1.82604	1.73307
108.94	1.24939	0.890537	1.81288	1.73689
109.272	1.24662	0.889703	1.80557	1.74568
109.603	1.22407	0.878622	1.78927	1.74036
109.934	1.23264	0.881782	1.78472	1.7384
110.265	1.23882	0.876231	1.75334	1.73482
110.596	1.23646	0.883384	1.75231	1.7332
110.927	1.24273	0.884195	1.75871	1.72523
111.258	1.24353	0.87781	1.76721	1.71548
111.589	1.23802	0.86673	1.77679	1.71543
111.921	1.23228	0.877043	1.76491	1.74102
112.252	1.24874	0.873861	1.7493	1.76234
112.583	1.23844	0.875441	1.73385	1.76495
112.914	1.23642	0.874651	1.72261	1.7536
113.245	1.22926	0.87781	1.705	1.7421
113.576	1.23703	0.873861	1.69429	1.74029
113.907	1.222	0.880158	1.70282	1.73503
114.238	1.21766	0.870636	1.70764	1.73915
114.57	1.21565	0.866708	1.6922	1.7296
114.901	1.22132	0.872259	1.70387	1.72648
115.232	1.21462	0.872259	1.70179	1.71412
115.563	1.22094	0.858721	1.69137	1.69153
115.894	1.21921	0.86989	1.6836	1.69974
116.225	1.21509	0.855606	1.69582	1.70506
116.556	1.22573	0.852424	1.69714	1.69142
116.887	1.22738	0.843647	1.69758	1.68819
117.219	1.22157	0.854816	1.67348	1.68323
117.55	1.21652	0.849199	1.67388	1.67861
117.881	1.20676	0.844503	1.66445	1.67716
118.212	1.21187	0.855584	1.66788	1.66396
118.543	1.21871	0.851612	1.66841	1.65637
118.874	1.21662	0.842901	1.6243	1.64844
119.205	1.21574	0.842068	1.60915	1.66343
119.536	1.22055	0.842858	1.61169	1.669
119.868	1.21198	0.846105	1.59949	1.65019
120.199	1.20981	0.850032	1.5881	1.64025
120.53	1.19974	0.836538	1.59056	1.64261
120.861	1.19432	0.838162	1.58126	1.63606
121.192	1.17679	0.832567	1.5747	1.63831
121.523	1.17122	0.833379	1.5517	1.64385
121.854	1.17826	0.83893	1.54543	1.64705
122.185	1.16029	0.830965	1.55527	1.63992
122.517	1.16631	0.834871	1.5521	1.64723
122.848	1.15696	0.828596	1.54304	1.63514
123.179	1.15031	0.823746	1.55349	1.63664
123.51	1.14713	0.830109	1.52164	1.62976
123.841	1.14563	0.809506	1.52404	1.61913
124.172	1.13851	0.824624	1.5275	1.61951
124.503	1.13576	0.814224	1.53213	1.63228
124.834	1.13602	0.808695	1.5285	1.64143
125.166	1.12743	0.814268	1.52593	1.64475
125.497	1.11251	0.815826	1.52984	1.62893
125.828	1.10183	0.819841	1.51454	1.62176
126.159	1.10038	0.814312	1.51003	1.61664
126.49	1.09886	0.815058	1.48683	1.61023
126.821	1.09555	0.802375	1.48593	1.60225
127.152	1.10195	0.803977	1.47574	1.59514
127.483	1.09682	0.805513	1.4732	1.59809
127.815	1.09095	0.803187	1.46813	1.58975
128.146	1.09677	0.802375	1.46521	1.59053
128.477	1.08737	0.803143	1.44484	1.58169
128.808	1.08185	0.797592	1.43444	1.57873
129.139	1.074	0.79678	1.44604	1.57597
129.47	1.08288	0.795135	1.43537	1.56424
129.801	1.06846	0.799216	1.43417	1.5776
130.132	1.0693	0.805535	1.42982	1.56622
130.464	1.0823	0.796846	1.41502	1.56508
130.795	1.08273	0.809506	1.43008	1.5557
131.126	1.09189	0.803143	1.4237	1.5406
131.457	1.09365	0.795178	1.42184	1.54802
131.788	1.08473	0.788047	1.43183	1.55083
132.119	1.09218	0.795244	1.40129	1.55782
132.45	1.08399	0.798338	1.38605	1.5522
132.781	1.0813	0.770582	1.37446	1.55747
133.113	1.0741	0.783242	1.37502	1.53668
133.444	1.07836	0.788047	1.36747	1.54621
133.775	1.08135	0.780938	1.37196	1.54758
134.106	1.07474	0.775365	1.34786	1.54813
134.437	1.08247	0.792831	1.34309	1.54586
134.768	1.07176	0.793599	1.33862	1.53897
135.099	1.0672	0.772206	1.33491	1.53746
135.43	1.07077	0.775299	1.34421	1.54998
135.762	1.06442	0.761915	1.34714	1.54765
136.093	1.06922	0.772206	1.33044	1.56401
136.424	1.05807	0.770604	1.30143	1.55561
136.755	1.05002	0.774597	1.30523	1.56232
137.086	1.04187	0.77451	1.28601	1.56023
137.417	1.04012	0.779293	1.30227	1.56327
137.748	1.03424	0.765755	1.29747	1.5551
138.079	1.02007	0.765777	1.28943	1.55903
138.411	1.0094	0.770582	1.28372	1.54687
138.742	1.00577	0.768256	1.28449	1.54065
139.073	1.01122	0.776967	1.26968	1.53873
139.404	0.999544	0.77135	1.26891	1.53091
139.735	1.00047	0.769814	1.25879	1.52508
140.066	1.00326	0.7579	1.24982	1.5306
140.397	0.994242	0.756254	1.25175	1.53045
140.728	0.986251	0.765799	1.23072	1.52441
141.06	0.988862	0.768146	1.23199	1.5244
141.391	0.976427	0.761125	1.21487	1.5232
141.722	0.976296	0.754696	1.20704	1.52071
142.053	0.972377	0.754696	1.215	1.51824
142.384	0.972268	0.766545	1.19664	1.51769
142.715	0.976546	0.758624	1.21103	1.51524
143.046	0.968198	0.746731	1.1949	1.51095
143.377	0.981485	0.758668	1.18807	1.50358
143.709	0.977114	0.767422	1.18824	1.4996
144.04	0.969884	0.764197	1.18227	1.49639
144.371	0.962864	0.759436	1.17155	1.49372
144.702	0.95984	0.765009	1.16854	1.49006
145.033	0.960253	0.754696	1.16597	1.48243
145.364	0.946479	0.758646	1.15799	1.47295
145.695	0.948028	0.752305	1.1443	1.47117
146.026	0.936756	0.753095	1.14121	1.4655
146.358	0.930677	0.752349	1.14755	1.45864
146.689	0.920377	0.749167	1.1471	1.4537
147.02	0.913249	0.75948	1.14589	1.44684
147.351	0.912506	0.74671	1.14029	1.43865
147.682	0.892142	0.742738	1.13432	1.43114
148.013	0.8952	0.745985	1.11709	1.42724
148.344	0.87854	0.760204	1.1373	1.41832
148.675	0.866601	0.74197	1.13666	1.41256
149.007	0.864169	0.75948	1.11583	1.40648
149.338	0.854419	0.7396	1.11723	1.39927
149.669	0.856011	0.748311	1.10559	1.39518
150	0.858608	0.74039	1.1022	1.39266
150.331	0.852152	0.739579	1.09473	1.3821
150.662	0.842557	0.749913	1.10659	1.37498
150.993	0.837401	0.746753	1.10094	1.36284
151.325	0.823256	0.742738	1.10174	1.35604
151.656	0.829669	0.733237	1.0853	1.35526
151.987	0.811345	0.736397	1.07635	1.35174
152.318	0.800438	0.737165	1.06942	1.3485
152.649	0.800276	0.730846	1.06482	1.34214
152.98	0.799422	0.7301	1.04439	1.33678
153.311	0.799128	0.728476	1.04486	1.33662
153.642	0.79028	0.727686	1.05295	1.33113
153.974	0.789857	0.71812	1.04801	1.32608
154.305	0.777682	0.721345	1.03425	1.31753
154.636	0.781011	0.717374	1.0245	1.31638
154.967	0.776963	0.734049	1.01827	1.30613
155.298	0.775007	0.726106	1.01217	1.30411
155.629	0.765017	0.726896	1.00663	1.29759
155.96	0.762404	0.734861	0.9973	1.2976
156.291	0.761892	0.723715	1.00221	1.29549
156.623	0.761205	0.713402	1.00955	1.29534
156.954	0.762117	0.709431	1.00785	1.29378
157.285	0.751703	0.732469	1.01177	1.28417
157.616	0.738762	0.720533	1.0197	1.28331
157.947	0.731898	0.715772	1.01477	1.28366
158.278	0.733801	0.71338	1.00837	1.27057
158.609	0.734798	0.720511	1.01356	1.27033
158.94	0.729866	0.716584	0.997753	1.27872
159.272	0.725937	0.717352	0.970505	1.26652
159.603	0.722934	0.714214	0.97559	1.26337
159.934	0.716962	0.718164	0.978702	1.25907
160.265	0.709292	0.703068	0.962132	1.25993
160.596	0.70616	0.705481	0.953722	1.25867
160.927	0.699106	0.714982	0.960039	1.24551
161.258	0.701175	0.702234	0.934459	1.24715
161.589	0.703251	0.701488	0.935073	1.24417
161.921	0.692005	0.69756	0.933192	1.24914
162.252	0.684851	0.705459	0.924065	1.25203
162.583	0.676148	0.703112	0.918911	1.25311
162.914	0.666305	0.699908	0.916985	1.24542
163.245	0.66741	0.71259	0.910202	1.24334
163.576	0.657615	0.704648	0.907751	1.23916
163.907	0.655846	0.699886	0.901355	1.2423
164.238	0.644542	0.702278	0.892084	1.23754
164.57	0.641151	0.691965	0.890852	1.22391
164.901	0.634849	0.699096	0.891113	1.2221
165.232	0.624338	0.700676	0.881558	1.22262
165.563	0.621432	0.704669	0.87673	1.22141
165.894	0.617365	0.703858	0.88034	1.21838
166.225	0.61582	0.691153	0.877039	1.21439
166.556	0.61618	0.691943	0.868251	1.21636
166.887	0.610718	0.698263	0.862565	1.21109
167.219	0.607197	0.689552	0.863568	1.20688
167.55	0.60347	0.698306	0.86059	1.20159
167.881	0.603795	0.699118	0.859038	1.19892
168.212	0.59525	0.691197	0.848865	1.19659
168.543	0.586921	0.692733	0.84869	1.19329
168.874	0.581861	0.696727	0.823978	1.19113
169.205	0.577848	0.687928	0.822396	1.18985
169.536	0.579112	0.699864	0.826228	1.18162
169.868	0.575874	0.694313	0.824505	1.18065
170.199	0.572395	0.695871	0.821923	1.17718
170.53	0.57091	0.689574	0.811078	1.17311
170.861	0.568763	0.674434	0.816531	1.16604
171.192	0.577621	0.687972	0.811463	1.16007
171.523	0.57344	0.687226	0.807609	1.16043
171.854	0.571086	0.680029	0.800639	1.15353
172.185	0.566559	0.678383	0.795993	1.14761
172.517	0.561114	0.668949	0.788368	1.14626
172.848	0.555571	0.683189	0.784765	1.14141
173.179	0.555919	0.671252	0.787183	1.13848
173.51	0.548238	0.683979	0.784721	1.13023
173.841	0.545815	0.68479	0.779246	1.13231
174.172	0.550793	0.664911	0.781584	1.12353
174.503	0.540673	0.676848	0.773105	1.11648
174.834	0.535996	0.672832	0.771545	1.12629
175.166	0.541732	0.684044	0.767938	1.12171
175.497	0.522355	0.681587	0.765459	1.11763
175.828	0.523261	0.669695	0.761158	1.1108
176.159	0.524599	0.669738	0.769476	1.10825
176.49	0.52386	0.667369	0.756507	1.10168
176.821	0.528875	0.672108	0.765557	1.09146
177.152	0.527667	0.677616	0.767742	1.09239
177.483	0.521022	0.677637	0.767989	1.09721
177.815	0.511254	0.674478	0.775101	1.08543
178.146	0.507205	0.673644	0.771712	1.08888
178.477	0.509124	0.679261	0.771563	1.0833
178.808	0.506622	0.67123	0.770476	1.07783
179.139	0.506184	0.674478	0.766022	1.0762
179.47	0.51409	0.659382	0.75618	1.0748
179.801	0.512026	0.654599	0.760867	1.06634
180.132	0.506996	0.677572	0.757671	1.07665
180.464	0.496924	0.672876	0.754835	1.07775
180.795	0.489517	0.667347	0.760205	1.07345
181.126	0.486868	0.663353	0.747189	1.06476
181.457	0.480779	0.679985	0.751079	1.06624
181.788	0.478067	0.662564	0.741397	1.06801
182.119	0.477427	0.668115	0.736798	1.05895
182.45	0.483698	0.665767	0.731976	1.05385
182.781	0.471856	0.663353	0.72917	1.05596
183.113	0.474618	0.661006	0.721785	1.05058
183.444	0.46162	0.660984	0.717575	1.04674
183.775	0.463615	0.664165	0.721422	1.05049
184.106	0.469174	0.65778	0.716939	1.04312
184.437	0.466108	0.652185	0.714379	1.04449
184.768	0.462187	0.657802	0.717695	1.03505
185.099	0.451256	0.645822	0.71567	1.0248
185.43	0.456537	0.645098	0.710874	1.02717
185.762	0.453195	0.642684	0.715361	1.02003
186.093	0.44702	0.649837	0.708933	1.01713
186.424	0.450445	0.652229	0.703977	1.0088
186.755	0.441514	0.645098	0.708969	1.00393
187.086	0.442455	0.651461	0.705166	0.999183
187.417	0.445118	0.645866	0.702573	0.992337
187.748	0.443348	0.643496	0.696214	0.990856
188.079	0.433711	0.648323	0.693349	0.987981
188.411	0.435925	0.639481	0.694749	0.980212
188.742	0.43218	0.653019	0.685492	0.98123
189.073	0.431241	0.637199	0.684154	0.989934
189.404	0.426286	0.638757	0.682827	0.979382
189.735	0.421687	0.636321	0.68751	0.981862
190.066	0.413333	0.651439	0.683947	0.983121
190.397	0.407486	0.653041	0.680348	0.987235
190.728	0.3972	0.635553	0.681962	0.971898
191.06	0.402006	0.632372	0.674927	0.985708
191.391	0.399658	0.649026	0.678039	0.968573
191.722	0.39734	0.646656	0.674694	0.971607
192.053	0.395246	0.641127	0.673036	0.965141
192.384	0.398689	0.645844	0.675065	0.969686
192.715	0.396884	0.640293	0.668447	0.971377
193.046	0.406715	0.637967	0.665706	0.957989
193.377	0.403309	0.641083	0.666957	0.955146
193.709	0.40135	0.632416	0.662656	0.963613
194.04	0.402634	0.637857	0.662845	0.954098
194.371	0.393394	0.637923	0.663855	0.94923
194.702	0.402754	0.637901	0.658027	0.943485
195.033	0.401979	0.619602	0.66131	0.943092
195.364	0.397567	0.625153	0.662081	0.929472
195.695	0.405053	0.634018	0.659125	0.924071
196.026	0.401235	0.631516	0.651763	0.910847
196.358	0.399512	0.620414	0.643531	0.914864
196.689	0.399224	0.617254	0.643244	0.904632
197.02	0.401728	0.641039	0.651657	0.916285
197.351	0.388047	0.625219	0.653653	0.886078
197.682	0.393032	0.620414	0.652024	0.865658
198.013	0.392783	0.620524	0.639015	0.87562
198.344	0.389204	0.630046	0.639154	0.85689
198.675	0.383732	0.61732	0.638092	0.856705
199.007	0.381098	0.626777	0.640677	0.842159
199.338	0.391415	0.623617	0.636583	0.82138
199.669	0.390327	0.625219	0.630518	0.842693
200	0.387164	0.61969	0.632456	0.813906
200.331	0.381376	0.620414	0.627439	0.81828
200.662	0.369723	0.62048	0.630082	0.810063
200.993	0.382481	0.618812	0.622661	0.806963
201.325	0.383129	0.622849	0.6301	0.805931
201.656	0.379758	0.619646	0.625152	0.79561
201.987	0.381421	0.6189	0.623018	0.796533
202.318	0.38309	0.633206	0.632598	0.79854
202.649	0.370916	0.614928	0.62008	0.785049
202.98	0.363668	0.623551	0.615812	0.782786
203.311	0.364584	0.621291	0.621123	0.782815
203.642	0.362704	0.611637	0.605271	0.768739
203.974	0.349399	0.602136	0.607936	0.76539
204.305	0.36094	0.617298	0.601126	0.752047
204.636	0.363367	0.612471	0.605438	0.752808
204.967	0.355173	0.610101	0.602297	0.749944
205.298	0.35047	0.613327	0.604769	0.76142
205.629	0.342719	0.605406	0.598465	0.752681
205.96	0.356171	0.626777	0.59921	0.747604
206.291	0.354426	0.60613	0.598832	0.743432
206.623	0.363243	0.60297	0.599865	0.732904
206.954	0.360086	0.625241	0.602493	0.728627
207.285	0.360073	0.60455	0.598269	0.721514
207.616	0.356093	0.602202	0.602792	0.716229
207.947	0.353702	0.603782	0.603442	0.689134
208.278	0.353991	0.600579	0.606107	0.694582
208.609	0.352836	0.60376	0.602159	0.688946
208.94	0.354894	0.595027	0.598858	0.707337
209.272	0.358317	0.606964	0.597305	0.691606
209.603	0.356277	0.599767	0.599021	0.691942
209.934	0.348897	0.601303	0.600247	0.691569
210.265	0.348813	0.595795	0.600243	0.692464
210.596	0.343322	0.60376	0.598632	0.683418
210.927	0.3444	0.602948	0.58947	0.690072
211.258	0.335267	0.598999	0.592349	0.698086
211.589	0.337709	0.604572	0.594098	0.683304
211.921	0.344696	0.599811	0.58755	0.697571
212.252	0.344551	0.593426	0.584227	0.676689
212.583	0.339358	0.603782	0.593869	0.661753
212.914	0.341399	0.602992	0.586132	0.686722
213.245	0.321741	0.595071	0.586845	0.67758
213.576	0.328848	0.592636	0.582224	0.670789
213.907	0.323421	0.601368	0.588419	0.659573
214.238	0.314013	0.591802	0.589244	0.65856
214.57	0.318322	0.60139	0.590735	0.641998
214.901	0.315122	0.596607	0.588997	0.655137
215.232	0.314336	0.589432	0.588314	0.648662
215.563	0.306707	0.596585	0.583863	0.653785
215.894	0.31051	0.600579	0.579879	0.648163
216.225	0.313136	0.603738	0.576046	0.650652
216.556	0.30894	0.594194	0.579628	0.646703
216.887	0.290677	0.587874	0.580068	0.627599
217.219	0.301749	0.583859	0.580344	0.630432
217.55	0.297346	0.585461	0.578272	0.630388
217.881	0.294351	0.593426	0.572705	0.613051
218.212	0.281185	0.581511	0.568927	0.618314
218.543	0.287665	0.592614	0.566593	0.594511
218.874	0.29318	0.583091	0.573647	0.598976
219.205	0.286849	0.592636	0.573916	0.593424
219.536	0.291459	0.583113	0.570087	0.577661
219.868	0.287119	0.590222	0.567644	0.587992
220.199	0.29036	0.585483	0.567557	0.588376
220.53	0.277915	0.582301	0.572985	0.558309
220.861	0.280949	0.579975	0.567702	0.556102
221.192	0.279945	0.591846	0.565364	0.542149
221.523	0.280771	0.579932	0.554973	0.539329
221.854	0.274495	0.57833	0.560198	0.538635
222.185	0.266942	0.570431	0.556024	0.517253
222.517	0.27308	0.577496	0.557507	0.495863
222.848	0.264266	0.573525	0.56035	0.511287
223.179	0.268247	0.570189	0.559216	0.506562
223.51	0.257396	0.555324	0.552715	0.493165
223.841	0.262713	0.554888	0.558067	0.471773
224.172	0.259973	0.554621	0.562816	0.481623
224.503	0.252853	0.550895	0.555944	0.480357
224.834	0.253485	0.548528	0.5569	0.432854
225.166	0.254218	0.547251	0.564655	0.430063
225.497	0.246923	0.547205	0.558307	0.450128
225.828	0.244002	0.541993	0.56115	0.453387
226.159	0.247247	0.527962	0.558834	0.43754
226.49	0.239393	0.524208	0.56058	0.431418
226.821	0.233648	0.51895	0.559562	0.411127
227.152	0.237802	0.516018	0.557438	0.423041
227.483	0.235793	0.515928	0.55526	0.417512
227.815	0.231492	0.515924	0.558245	0.415554
228.146	0.235526	0.510357	0.554115	0.408236
228.477	0.230396	0.509604	0.54913	0.406778
228.808	0.231117	0.508311	0.549527	0.409959
229.139	0.228194	0.504308	0.543866	0.393327
229.47	0.234302	0.50383	0.551595	0.39177
229.801	0.23365	0.500794	0.545076	0.406821
230.132	0.23007	0.49864	0.545534	0.398111
230.464	0.229983	0.497039	0.548636	0.386218
230.795	0.230645	0.495569	0.550596	0.388544
231.126	0.238509	0.492217	0.549341	0.382993
231.457	0.229658	0.490558	0.55558	0.389378
231.788	0.232958	0.489773	0.5585	0.39969
232.119	0.227567	0.486005	0.554319	0.386153
232.45	0.227557	0.478794	0.556377	0.387798
232.781	0.225555	0.472656	0.550661	0.39177
233.113	0.224336	0.471129	0.548778	0.386174
233.444	0.228323	0.470554	0.553093	0.394161
233.775	0.231669	0.469613	0.554126	0.385319
234.106	0.232887	0.467597	0.555969	0.389334
234.437	0.22818	0.466731	0.554188	0.379022
234.768	0.223313	0.466404	0.54949	0.383849
235.099	0.228231	0.464439	0.550821	0.379855
235.43	0.224109	0.4644	0.54981	0.372615
235.762	0.216716	0.463504	0.552912	0.371057
236.093	0.222722	0.457283	0.543102	0.371825
236.424	0.218245	0.455034	0.552606	0.372615
236.755	0.218988	0.453322	0.554017	0.390146
237.086	0.218031	0.451526	0.557387	0.377442
237.417	0.216293	0.447818	0.55818	0.367129
237.748	0.221247	0.443664	0.554257	0.375028
238.079	0.219975	0.44198	0.553988	0.363114
238.411	0.218612	0.440068	0.555933	0.368687
238.742	0.21503	0.438483	0.555915	0.371847
239.073	0.207202	0.437469	0.546091	0.367919
239.404	0.217697	0.437278	0.544687	0.362302
239.735	0.217663	0.436244	0.546254	0.365549
240.066	0.214752	0.435947	0.547996	0.370333
240.397	0.217117	0.429244	0.547098	0.371934
240.728	0.216133	0.426142	0.543891	0.367107
241.06	0.216107	0.423455	0.542037	0.359976
241.391	0.216812	0.421633	0.543655	0.352823
241.722	0.212769	0.421034	0.544273	0.352823
242.053	0.214829	0.420623	0.546436	0.355983
242.384	0.215173	0.418672	0.549152	0.358331
242.715	0.208149	0.418505	0.548225	0.356751
243.046	0.209918	0.417699	0.552403	0.348874
243.377	0.203674	0.416508	0.553697	0.355149
243.709	0.202362	0.415323	0.551148	0.34567
244.04	0.196896	0.415077	0.547451	0.356049
244.371	0.1967	0.414903	0.552737	0.345648
244.702	0.194037	0.414733	0.559132	0.356729
245.033	0.190093	0.414711	0.552566	0.34962
245.364	0.195561	0.413955	0.554846	0.340909
245.695	0.190591	0.41206	0.555871	0.340931
246.026	0.187406	0.407717	0.555104	0.333778
246.358	0.181307	0.406501	0.551555	0.334546
246.689	0.177274	0.40569	0.554079	0.351265
247.02	0.176927	0.405659	0.553733	0.339329
247.351	0.175882	0.405445	0.545444	0.336872
247.682	0.183183	0.40449	0.551977	0.335292
248.013	0.173593	0.403798	0.548556	0.349598
248.344	0.173533	0.40377	0.548516	0.337684
248.675	0.171123	0.403668	0.548447	0.336916
249.007	0.170239	0.402603	0.543084	0.334546
249.338	0.170535	0.40252	0.546614	0.317058
249.669	0.171632	0.40188	0.541808	0.325045
250	0.163566	0.399992	0.543829	0.338473
250.331	0.164246	0.399825	0.542589	0.324979
250.662	0.168709	0.398213	0.539783	0.333756
250.993	0.175624	0.397294	0.546109	0.324211
251.325	0.17729	0.396994	0.545178	0.328227
251.656	0.169407	0.396645	0.543131	0.320262
251.987	0.170669	0.39545	0.538721	0.321864
252.318	0.176746	0.395173	0.537088	0.317102
252.649	0.175175	0.394631	0.538263	0.31945
252.98	0.173862	0.394409	0.533602	0.322588
253.311	0.172039	0.394343	0.531471	0.30916
253.642	0.172744	0.393955	0.529268	0.310695
253.974	0.169479	0.393684	0.528642	0.313855
254.305	0.162514	0.393487	0.524214	0.315435
254.636	0.166786	0.393309	0.527355	0.316312
254.967	0.165927	0.393	0.527123	0.32024
255.298	0.162458	0.390968	0.521418	0.317826
255.629	0.15794	0.390296	0.522018	0.313855
255.96	0.153626	0.390019	0.519978	0.30837
256.291	0.158267	0.388611	0.524203	0.316247
256.623	0.149593	0.388074	0.518386	0.306746
256.954	0.153222	0.387757	0.523305	0.297635
257.285	0.156325	0.385086	0.521909	0.296494
257.616	0.155898	0.384747	0.524265	0.291501
257.947	0.15298	0.384737	0.520385	0.284393
258.278	0.153545	0.384388	0.519604	0.285003
258.609	0.157481	0.382425	0.520734	0.282154
258.94	0.151755	0.379316	0.521182	0.284988
259.272	0.147681	0.377872	0.524927	0.285624
259.603	0.144364	0.377064	0.524218	0.282405
259.934	0.149491	0.376882	0.532275	0.284716
260.265	0.146196	0.37523	0.529337	0.285892
260.596	0.143666	0.374698	0.535929	0.284272
260.927	0.14038	0.374637	0.527744	0.282103
261.258	0.143863	0.374054	0.520018	0.281772
261.589	0.145752	0.373951	0.522483	0.275785
261.921	0.142291	0.370802	0.52705	0.276694
262.252	0.135624	0.369427	0.534747	0.280415
262.583	0.143178	0.369369	0.544026	0.282418
262.914	0.149589	0.368623	0.565219	0.281746
263.245	0.141374	0.368189	0.573061	0.281385
263.576	0.134057	0.367366	0.582187	0.275537
263.907	0.134156	0.365014	0.598992	0.279955
264.238	0.139045	0.364827	0.610031	0.277437
264.57	0.139082	0.361569	0.614484	0.271269
264.901	0.136432	0.359895	0.604406	0.274174
265.232	0.133615	0.358998	0.594524	0.268052
265.563	0.132451	0.357385	0.586939	0.276873
265.894	0.134603	0.357099	0.579162	0.271383
266.225	0.132828	0.356821	0.56988	0.275413
266.556	0.132751	0.354604	0.566633	0.270831
266.887	0.130901	0.35369	0.560038	0.260854
267.219	0.125441	0.352398	0.551763	0.261383
267.55	0.129176	0.351426	0.552784	0.257049
267.881	0.127163	0.3504	0.543044	0.25615
268.212	0.125853	0.349274	0.540841	0.264571
268.543	0.12509	0.348788	0.540644	0.260518
268.874	0.128984	0.348128	0.536409	0.261601
269.205	0.125539	0.345559	0.532765	0.255034
269.536	0.129693	0.342636	0.527003	0.25804
269.868	0.12244	0.341484	0.525465	0.260711
270.199	0.120364	0.341415	0.526661	0.26036
270.53	0.119535	0.338114	0.522396	0.267565
270.861	0.115999	0.338056	0.51688	0.262145
271.192	0.12098	0.338012	0.514637	0.266252
271.523	0.127465	0.337311	0.519447	0.268771
271.854	0.118942	0.336465	0.522341	0.271491
272.185	0.121433	0.336268	0.519331	0.261807
272.517	0.121573	0.335379	0.516037	0.260511
272.848	0.11565	0.334999	0.51547	0.26073
273.179	0.120163	0.332262	0.518171	0.255304
273.51	0.113825	0.331134	0.521334	0.261056
273.841	0.121311	0.330282	0.517917	0.254003
274.172	0.121548	0.329324	0.511489	0.257072
274.503	0.127477	0.325792	0.515026	0.257777
274.834	0.123038	0.323357	0.509362	0.253282
275.166	0.127093	0.32326	0.516331	0.248976
275.497	0.132277	0.323033	0.513405	0.256423
275.828	0.127404	0.322286	0.513328	0.259001
276.159	0.133181	0.322216	0.510521	0.251509
276.49	0.133416	0.320881	0.509809	0.251755
276.821	0.125798	0.320184	0.511965	0.250596
277.152	0.130031	0.319892	0.511347	0.247118
277.483	0.128761	0.318711	0.511209	0.246837
277.815	0.128167	0.318067	0.513986	0.244751
278.146	0.124249	0.316386	0.512863	0.244585
278.477	0.127441	0.314637	0.511419	0.245651
278.808	0.121695	0.31214	0.513801	0.250939
279.139	0.126561	0.310116	0.512492	0.252013
279.47	0.125961	0.310019	0.51107	0.252446
279.801	0.126906	0.308758	0.506675	0.25102
280.132	0.126375	0.307262	0.51227	0.24798
280.464	0.123858	0.305415	0.509591	0.247336
280.795	0.118647	0.304944	0.509605	0.248239
281.126	0.110811	0.302065	0.508198	0.247643
281.457	0.108313	0.30181	0.515477	0.244469
281.788	0.106716	0.301514	0.509914	0.250595
282.119	0.10593	0.300052	0.505289	0.250661
282.45	0.10545	0.299806	0.504755	0.247807
282.781	0.105251	0.295995	0.50081	0.241998
283.113	0.105172	0.295254	0.499607	0.241668
283.444	0.104393	0.294769	0.506406	0.241006
283.775	0.103954	0.294241	0.50373	0.24881
284.106	0.103835	0.293058	0.512063	0.243649
284.437	0.103262	0.292645	0.50393	0.233457
284.768	0.103086	0.292153	0.507416	0.237528
285.099	0.102207	0.291509	0.509362	0.234189
285.43	0.102122	0.29137	0.515473	0.232971
285.762	0.100845	0.291215	0.512477	0.230899
286.093	0.100075	0.290712	0.507184	0.232526
286.424	0.0933297	0.290586	0.506355	0.231385
286.755	0.0922141	0.287878	0.504766	0.233942
287.086	0.0911719	0.286872	0.507027	0.233131
287.417	0.0906819	0.285783	0.505097	0.237367
287.748	0.0896656	0.285709	0.503533	0.23396
288.079	0.0889666	0.285114	0.509322	0.231165
288.411	0.0883044	0.284106	0.507525	0.223839
288.742	0.0864557	0.283177	0.506344	0.228696
289.073	0.0863642	0.28244	0.508769	0.229897
289.404	0.0859678	0.282213	0.505642	0.229345
289.735	0.0805375	0.282124	0.506035	0.232516
290.066	0.0768704	0.281671	0.51074	0.230564
290.397	0.0767935	0.281662	0.512488	0.231499
290.728	0.0748162	0.280958	0.518178	0.229743
291.06	0.0741043	0.280564	0.516328	0.230997
291.391	0.0736933	0.278069	0.518375	0.230033
291.722	0.0731471	0.277106	0.520294	0.227325
292.053	0.0729999	0.276635	0.51872	0.219907
292.384	0.0727715	0.275351	0.520865	0.219548
292.715	0.0725392	0.273452	0.525788	0.219153
293.046	0.0724447	0.27283	0.528428	0.219529
293.377	0.0715523	0.272201	0.521196	0.220875
293.709	0.0713174	0.271066	0.514295	0.217831
294.04	0.071197	0.268243	0.51607	0.225435
294.371	0.0711339	0.263975	0.508376	0.223668
294.702	0.0710355	0.262767	0.510401	0.225147
295.033	0.0703128	0.262226	0.509776	0.221164
295.364	0.0700378	0.261703	0.511848	0.227008
295.695	0.0692451	0.259481	0.509754	0.22712
296.026	0.0686662	0.256123	0.509238	0.223112
296.358	0.0683121	0.253292	0.501872	0.221886
296.689	0.0682245	0.251144	0.502428	0.22192
297.02	0.0676879	0.250893	0.502457	0.224469
297.351	0.0676101	0.250051	0.50666	0.220096
297.682	0.0661414	0.24643	0.499694	0.220729
298.013	0.0656928	0.245787	0.503439	0.219366
298.344	0.0655767	0.244721	0.502643	0.218884
298.675	0.0649144	0.243557	0.500548	0.218117
299.007	0.0647965	0.242236	0.507155	0.219162
299.338	0.0626495	0.237409	0.509049	0.221179
299.669	0.0615858	0.235957	0.506478	0.223442
300	0.0611696	0.234274	0.506424	0.223504
900.331	0.00758822	0.00525535	0.00032057	0.00973589
900.662	0.0229633	0.0131761	-0.0016118	0.00846608
900.993	-0.0111556	-0.0056074	0.00499434	0.00989085
901.325	0.010525	-0.0005532	-0.0097909	0.0082853
901.656	0.010525	0.0158163	0.00818508	0.0100716
901.987	0.0136346	-0.0056074	-0.009746	0.00470402
902.318	0.00110995	0.00208705	0.0244534	0.00157901
902.649	-0.0141788	0.00751842	0.0147014	0.00621057
902.98	-0.0143515	0.0212477	0.00166877	0.00401961
903.311	0.0227906	0.0210214	-0.0097909	0.0126112
903.642	-0.0267898	0.0266791	0.00333156	0.00102804
903.974	0.0445576	0.0103095	0.00805026	0.0028402
904.305	0.0103523	0.0105358	0.0132184	0.00660227
904.636	-0.0111556	0.0047273	-0.0162623	0.00708867
904.967	-0.0081324	0.00487817	0.00162383	-0.0007927
905.298	0.00741547	0.00744298	0.00166877	0.00377857
905.629	-0.0019996	0.0182303	0.0114208	0.00052442
905.96	0.0197674	-0.0032689	0.00665712	0.00162205
906.291	-0.0111556	-0.0166964	-0.0063755	0.0134721
906.623	0.0104387	-0.0007041	0.00490446	0.00367096
906.954	0.0259002	0.0128743	0.0229704	0.00927531
907.285	0.0165714	0.0371646	-0.0030949	-0.0046839
907.616	0.010525	-0.0005532	0.0080952	0.0035203
907.947	-0.0235075	-0.024768	5.0932e-05	-0.0010381
908.278	0.00119632	0.0130252	-0.0129817	0.00534538
908.609	0.0197674	-0.0110387	0.0164541	-0.0077185
908.94	0.0043059	-0.0141316	-0.0081282	-0.00149
909.272	0.0134619	-0.0114914	0.00984786	-0.0022691
909.603	-0.0173747	0.029093	0.0147014	-0.0061819
909.934	-0.0082188	-0.0246926	0.00324168	0.00355043
910.265	-0.0051092	-0.0005532	-0.001522	0.00095056
910.596	-0.0142652	-0.00606	0.0065223	0.00062773
910.927	0.00741547	0.0105358	-0.0016118	0.00237963
911.258	0.0321193	0.0078956	0.00503928	-0.0037154
911.589	-0.0175475	0.00253967	0.00018575	-0.0031128
911.921	0.010525	0.00510448	-0.0147343	-0.0057557
912.252	-0.0019133	0.00253967	-0.0032297	-0.0042018
912.583	-0.0297267	-0.0112651	-0.0016568	-0.0065434
912.914	-0.0019996	-0.0193367	0.00328662	-0.0031171
913.245	-0.0016541	-0.0194121	-0.0016118	0.00085586
913.576	-0.0174611	-0.0033443	-0.0016568	-0.0071934
913.907	-0.0297267	0.00774473	0.00175865	-0.0058203
914.238	-0.0082188	-0.0029671	-0.0129367	-0.0090572
914.57	-0.0297267	-0.0002515	0.00823002	-0.0040038
914.901	0.00413314	-0.0083985	-0.009746	-0.0016579
915.232	-0.0019133	-0.0007041	0.00324168	-0.0002116
915.563	0.00732909	-0.0056828	-0.0097011	-0.0013308
915.894	0.0197674	-0.0082476	-0.0064654	0.00047277
916.225	-0.002086	-0.0138299	0.0033765	-0.0004828
916.556	-0.0082188	-0.0004023	-0.0097909	-0.0054932
916.887	-0.0078733	-0.0031934	-0.0064204	-0.0080887
917.219	-0.0113283	-0.0058337	0.00162383	-0.0064358
917.55	-0.0018269	0.00495361	-0.0113189	-0.001942
917.881	-0.0109828	-0.0219769	0.0146564	-0.0007798
918.212	-0.0079596	-0.0273328	-0.0130266	-0.0055922
918.543	-0.0081324	0.00480274	0.00346638	-0.0056739
918.874	-0.0019133	-0.0031934	-0.0130266	-0.0091132
919.205	0.00741547	-0.0139053	-0.0162623	-0.0059322
919.536	-0.0081324	-0.0087757	-0.0129817	-0.008093
919.868	0.0136346	-0.0034197	-0.0064654	-0.0056567
920.199	0.00750185	0.0023888	-0.019498	-0.0095393
920.53	-0.0050228	-0.0111142	0.00508422	-0.0054587
920.861	0.0197674	-0.0137544	-0.001522	-0.0114849
921.192	-0.0235939	-0.0082476	-0.0179251	-0.0071159
921.523	-0.0051092	-0.000176	-0.0048026	-0.0121005
921.854	-0.0266171	-0.0329151	-0.0113638	-0.0112654
922.185	0.00119632	-0.0329905	-0.019498	-0.01003
922.517	-0.0049364	-0.0032689	-0.001477	-0.0055491
922.848	-0.0049364	-0.0139053	-0.0177453	-0.0113816
923.179	-0.0017405	-0.0272574	-0.0145096	-0.0129872
923.51	-0.0049364	-0.0138299	-0.0032746	-0.0155956
923.841	0.00439227	-0.0219015	-0.0047577	-0.0143904
924.172	-0.0111556	-0.0111142	-0.0129817	-0.0152169
924.503	-0.0081324	-0.0083231	0.00171371	-0.0134047
924.834	-0.008046	-0.0054565	-0.0097011	-0.0073914
925.166	-0.0016541	-0.0058337	-0.001522	-0.0163618
925.497	0.0230497	0.00502904	-0.0193182	-0.0104045
925.828	0.00119632	-0.0271065	-0.0244414	-0.0057471
926.159	0.0104387	0.00502904	-0.011229	-0.0137447
926.49	0.0106114	-0.0005532	-0.0064204	-0.0133616
926.821	-0.0047637	-0.016621	-0.0162174	-0.0120316
927.152	-0.0110692	-0.0163947	-0.0081282	-0.0109038
927.483	0.0322057	-0.0111142	-0.0048026	-0.0094532
927.815	0.0106978	-0.0055319	-0.0047577	-0.0067716
928.146	0.00741547	0.00223792	0.0146564	-0.0014255
928.477	0.0106114	-0.0056828	-0.0097011	-0.0053038
928.808	0.0106114	-0.00606	0.00175865	-0.0140633
929.139	0.00413314	-0.0083985	5.0932e-05	-0.0134047
929.47	0.0138074	-0.0381956	-0.0096112	-0.0134951
929.801	-0.0081324	-0.003118	-0.0097909	-0.0066252
930.132	0.0136346	-0.0002515	-0.0064204	0.00060621
930.464	0.0043059	-0.003118	-0.0144647	-0.001404
930.795	-0.0081324	0.00223792	0.00171371	-0.0032979
931.126	-0.0018269	0.00510448	0.00180359	-0.0070428
931.457	0.0106114	-0.0166964	0.00656724	0.00268524
931.788	0.022877	0.00510448	0.0131285	-0.001249
932.119	0.0259865	-0.0191858	0.00014081	0.00081712
932.45	0.0135482	0.00480274	0.0146564	0.00395074
932.781	-0.0109828	-0.0004023	0.00661218	-0.0021228
933.113	0.0106978	-0.0033443	0.0065223	-0.0033711
933.444	0.022877	0.0130252	0.0115556	-6.959e-05
933.775	0.0443848	-0.0217506	0.017982	0.00215149
934.106	0.0198538	0.0400312	0.0211278	0.00292199
934.437	0.0537136	0.0184566	0.0211728	0.00468249
934.768	0.0165714	0.00751842	0.0260263	0.00265942
935.099	0.00102357	0.0211723	0.0197347	0.003516
935.43	0.0447304	-0.0056828	0.0178921	-0.0003709
935.762	0.0043059	0.00744298	0.0390589	0.00275842
936.093	-0.0018269	0.0103095	0.0212626	-0.0009778
936.424	0.0166578	0.0183057	0.0163642	0.00155318
936.755	0.0106978	0.0156655	-0.0017017	-0.0067716
937.086	-0.0019996	0.00495361	0.00823002	0.00134657
937.417	0.0320329	0.00201162	0.0162294	0.00336104
937.748	0.0289234	-0.0112651	0.0342503	0.00020159
938.079	0.0104387	-0.0114159	0.0162743	-0.011274
938.411	0.0104387	-0.0355553	0.0244534	-0.0093413
938.742	0.0319465	-0.0031934	0.00175865	-0.0103098
939.073	-0.0048501	0.0103095	0.0115556	-0.0122683
939.404	0.0167442	-0.0004023	0.0114208	-0.0071719
939.735	-0.0113283	0.0184566	0.0163192	-0.0100257
940.066	0.0167442	-0.0031934	0.0293968	-0.0023595
940.397	0.022877	-0.0032689	0.00328662	-0.0123888
940.728	-0.0082188	0.0023888	0.00647736	-0.0048819
941.06	0.0165714	0.00744298	0.0197347	-0.0023983
941.391	0.0321193	-0.0029671	0.0116005	-0.0034141
941.722	0.0104387	-0.0083985	0.0163192	-0.0067156
942.053	0.0322921	0.020946	0.0212177	-0.0054243
942.384	0.0413616	0.00193618	-0.0017017	-0.0074732
942.715	0.0197674	-0.0167719	0.00643242	0.00409709
943.046	0.010525	0.00759385	0.0049494	-0.0036164
943.377	0.0322057	-0.0167719	0.0178472	-0.0033065
943.709	0.0321193	-0.0087002	0.0083199	-0.0037714
944.04	0.00741547	0.00495361	0.0114657	-0.0053856
944.371	0.0382521	-0.0111896	-0.0032746	-0.0054372
944.702	0.0229633	-0.0139807	0.00328662	-0.0099267
945.033	0.0319465	-0.0087757	0.00166877	-0.0074474
945.364	0.0103523	0.0101587	-0.0015669	-0.0105379
945.695	0.019681	0.0047273	0.0080952	-0.0033022
946.026	0.010525	-0.0274837	-0.0047127	-0.0015804
946.358	0.0199401	0.00751842	0.00481458	-0.0027728
946.689	0.0351425	0.00216249	-0.0080832	-0.0100774
947.02	0.0350561	-0.0033443	-0.0096112	-0.0119412
947.351	0.0103523	-0.0379693	-0.0047127	-0.0107316
947.682	0.0227906	-0.0222032	-0.0065103	-0.0151092
948.013	0.010525	-0.0194121	-0.0048925	-0.0136156
948.344	0.0227906	-0.0030426	-0.009746	-0.0181783
948.675	0.0135482	-0.0249189	-0.018015	-0.0187207
949.007	0.0166578	0.00502904	-0.0047127	-0.0149629
949.338	0.0197674	-0.0055319	5.992e-06	-0.0131206
949.669	0.0166578	0.0047273	-0.0145096	-0.0129958
950	-0.0082188	-0.0140562	-0.0016118	-0.0050111
950.331	0.0135482	-0.019563	-0.0212507	-0.012957
950.662	0.010525	-0.0167719	0.00818508	-0.0122898
950.993	0.0230497	0.00495361	-0.0049374	-0.0196891
951.325	0.0133755	-0.0139807	-0.019498	-0.0135295
951.656	0.0259865	-0.0058337	0.00499434	-0.0146659
951.987	0.0260729	-0.0139053	-0.0308229	-0.0200249
952.318	0.0259865	0.0102341	-0.0162623	-0.0119068
952.649	0.022877	-0.0139807	-0.0260592	-0.0179286
952.98	0.0134619	-0.0083985	-0.0129367	-0.0165771
953.311	0.0290961	-0.0139053	-0.0260143	-0.0156516
953.642	0.0260729	-0.0058337	-0.0225989	-0.0101549
953.974	0.00750185	-0.0109633	-0.0179251	-0.0113816
954.305	0.00110995	-0.0304257	-0.0047577	-0.0163446
954.636	0.0197674	-0.0058337	-0.0244863	-0.0134779
954.967	0.0198538	-0.0083985	-0.0275423	-0.0173648
955.298	-0.0079596	-0.0276346	-0.0276321	-0.0149672
955.629	-0.0019996	0.0100832	0.00166877	-0.0152125
955.96	0.0351425	-0.0169227	-0.0325306	-0.0154106
956.291	0.0415344	-0.0275592	-0.027722	-0.0181525
956.623	0.0384248	0.00201162	-0.0211608	-0.0158754
956.954	0.00732909	-0.0059846	-0.0243965	-0.018316
957.285	0.025641	-0.0274083	-0.0212057	-0.0174422
957.616	0.0352289	-0.0166964	-0.0455183	-0.0170807
957.947	0.0536272	-0.0058337	-0.0146894	-0.0116829
958.278	0.00413314	-0.0139807	-0.0259694	-0.0175886
958.609	0.00421952	0.00766929	-0.0292949	-0.0139557
958.94	0.0104387	-0.0169227	-0.0325755	-0.0196074
959.272	0.0168306	-0.0192612	-0.0212507	-0.0184796
959.603	0.0259865	-0.0033443	-0.0405749	-0.0146228
959.934	0.0195946	-0.0085494	-0.0146445	-0.0139298
960.265	0.0165714	-0.021826	-0.0390469	-0.0153761
960.596	0.0167442	-0.0141316	-0.0259694	-0.0198527
960.927	0.0135482	0.0264528	-0.0375189	-0.0169128
961.258	0.0134619	-0.0059846	-0.0439004	-0.0165211
961.589	0.0103523	-0.0138299	-0.0423275	-0.0224009
961.921	0.00413314	-0.0058337	-0.0423275	-0.025018
962.252	-0.008046	-0.0435515	-0.0226887	-0.0218758
962.583	0.0165714	-0.024768	-0.0291601	-0.0240022
962.914	0.0290961	-0.016621	-0.047226	-0.0267355
963.245	0.00110995	0.00216249	-0.0211608	-0.0230466
963.576	0.0103523	-0.0084739	-0.0456531	-0.0290384
963.907	0.00741547	-0.0140562	-0.0471361	-0.0323829
964.238	-0.0050228	-0.0249189	-0.0374291	-0.0281301
964.57	0.00413314	-0.0222032	-0.0617416	-0.0285261
964.901	0.0167442	-0.024768	-0.0309128	-0.0197494
965.232	0.0135482	-0.0191104	-0.0454733	-0.0271014
965.563	-0.008046	-0.0272574	-0.0423275	-0.0272004
965.894	0.0321193	-0.0274083	-0.0668199	-0.032116
966.225	0.00110995	-0.0380447	-0.0424624	-0.0275921
966.556	0.0197674	-0.030124	-0.0684377	-0.0264729
966.887	-0.0111556	-0.021826	-0.0650223	-0.0324475
967.219	0.0165714	-0.0274837	-0.0748641	-0.0328176
967.55	-0.0019133	-0.0164701	-0.0504617	-0.0317932
967.881	0.00421952	-0.0246172	-0.0570229	-0.0333944
968.212	0.0476672	-0.033066	-0.0521245	-0.029288
968.543	0.00413314	-0.0355553	-0.0602586	-0.0311777
968.874	0.00732909	-0.0300485	-0.0651121	-0.0348924
969.205	-0.0050228	-0.0383465	-0.0617866	-0.0329123
969.536	-0.0050228	-0.0139053	-0.0603485	-0.0376171
969.868	0.00110995	-0.0461163	-0.0812906	-0.0377591
970.199	0.0165714	-0.0328396	-0.06673	-0.0319438
970.53	-0.0017405	-0.0139053	-0.0602586	-0.0321591
970.861	0.022877	-0.0139053	-0.0699207	-0.0384478
971.192	0.010525	-0.0465689	-0.0765269	-0.0332352
971.523	0.00732909	-0.0194875	-0.0683928	-0.0308634
971.854	-0.0051092	-0.0031934	-0.0552703	-0.0332782
972.185	-0.0019133	-0.0328396	-0.0797626	-0.0382197
972.517	-0.0144379	-0.033066	-0.0585509	-0.0274543
972.848	0.0227906	-0.0327642	-0.0781448	-0.0308032
973.179	-0.0174611	-0.0627122	-0.076437	-0.0308979
973.51	0.0197674	-0.0274083	-0.0699207	-0.0360072
973.841	0.00750185	-0.0244663	-0.0765269	-0.0351679
974.172	0.0166578	-0.02771	-0.0683478	-0.0375482
974.503	0.0103523	-0.0409867	-0.074954	-0.0396574
974.834	0.0290097	-0.0408358	-0.0668199	-0.0378969
975.166	-0.0050228	-0.0219769	-0.0602586	-0.0336269
975.497	0.00421952	-0.0355553	-0.076437	-0.0391064
975.828	-0.0175475	-0.0596947	-0.06673	-0.0416977
976.159	0.0043059	-0.0326888	-0.0668199	-0.0323097
976.49	0.0136346	-0.035329	-0.0878069	-0.032611
976.821	0.0101795	-0.0192612	-0.0895595	-0.0357446
977.152	0.0134619	-0.0327642	-0.0749091	-0.0347202
977.483	0.00421952	-0.0409113	-0.0894247	-0.0354692
977.815	0.0445576	-0.0569791	-0.0846611	-0.0362138
978.146	-0.0235939	-0.0544897	-0.0976937	-0.0374707
978.477	0.00439227	-0.0434006	-0.0830882	-0.0458773
978.808	0.0165714	-0.0381956	-0.0748641	-0.041603
979.139	0.00421952	-0.0219015	-0.0617866	-0.0370145
979.47	-0.0050228	-0.0409113	-0.101019	-0.0439661
979.801	0.0227906	-0.0328396	-0.0994463	-0.0397865
980.132	0.0136346	-0.0518494	-0.0780549	-0.0330888
980.464	0.0103523	-0.016621	-0.0766168	-0.0307128
980.795	0.0259865	-0.0244663	-0.0847509	-0.028298
981.126	0.00724272	-0.0437024	-0.0830432	-0.0362224
981.457	0.0195946	-0.0301994	-0.0683029	-0.0343199
981.788	0.0167442	-0.0222032	-0.0878967	-0.0310098
982.119	0.0165714	-0.0410621	-0.0813355	-0.0368294
982.45	0.00421952	-0.0490583	-0.0880316	-0.0334504
982.781	0.0136346	-0.0435515	-0.0895595	-0.0434926
983.113	0.0290097	-0.0409113	-0.101064	-0.0469964
983.444	0.00421952	-0.0544897	-0.0798075	-0.0402212
983.775	-0.0019133	-0.0328396	-0.0962107	-0.0423821
984.106	-0.0081324	-0.021826	-0.104255	-0.0485331
984.437	0.0104387	-0.0223541	-0.0863238	-0.0444181
984.768	0.0259002	-0.0355553	-0.105783	-0.044771
985.099	0.00724272	-0.0464181	-0.105918	-0.0452832
985.43	0.00732909	-0.0571299	-0.0928402	-0.0484987
985.762	0.0166578	-0.0463426	-0.105918	-0.0414652
986.093	0.0322057	-0.0410621	-0.100884	-0.0436002
986.424	0.010525	-0.0652015	-0.118816	-0.0463766
986.755	-0.0019996	-0.0196384	-0.107446	-0.0423261
987.086	0.00421952	-0.0276346	-0.100929	-0.0401825
987.417	0.00110995	-0.0544897	-0.0928402	-0.045662
987.748	-0.0175475	-0.0624859	-0.0976487	-0.0535607
988.079	-0.0019996	-0.0437024	-0.114007	-0.0512707
988.411	0.0227906	-0.0220524	-0.0945928	-0.0497383
988.742	0.0197674	-0.0461918	-0.0846161	-0.0412199
989.073	0.010525	-0.0596193	-0.100929	-0.0451498
989.404	-0.0049364	-0.0354799	-0.0813804	-0.0438929
989.735	0.00421952	-0.0438533	-0.0878518	-0.0460236
990.066	0.0166578	-0.0354799	-0.100974	-0.0377118
990.397	0.00421952	-0.0383465	-0.0943681	-0.0385081
990.728	0.0134619	-0.0409867	-0.0862789	-0.0433032
991.06	0.0136346	-0.0380447	-0.10412	-0.0451541
991.391	0.00119632	-0.0381956	-0.105873	-0.0433075
991.722	0.0134619	-0.0437024	-0.0993115	-0.0437595
992.053	0.0445576	-0.0274837	-0.107491	-0.0474053
992.384	0.0381657	-0.0383465	-0.0896045	-0.0464325
992.715	0.00413314	-0.0571299	-0.102727	-0.0479434
993.046	0.0197674	-0.0407604	-0.0927952	-0.0454942
993.377	-0.0019996	-0.0301994	-0.107446	-0.0472676
993.709	-0.0051956	-0.0303503	-0.13023	-0.0403934
994.04	0.0165714	-0.041213	-0.109198	-0.0491529
994.371	0.00110995	-0.0274083	-0.105873	-0.0487354
994.702	0.0197674	-0.0514723	-0.100974	-0.0476335
995.033	0.0135482	-0.0489074	-0.131803	-0.0473838
995.364	0.0165714	-0.0515477	-0.133691	-0.0575724
995.695	0.0260729	-0.0597702	-0.11886	-0.0495231
996.026	-0.0328362	-0.0651261	-0.120523	-0.0509651
996.358	0.0197674	-0.0544142	-0.107491	-0.050978
996.689	0.00110995	-0.054716	-0.109198	-0.0513094
997.02	0.00421952	-0.0572808	-0.140117	-0.0480123
997.351	-0.0050228	-0.0595439	-0.125377	-0.0526912
997.682	0.0102659	-0.0841359	-0.131983	-0.0529709
998.013	-0.0082188	-0.070482	-0.126995	-0.056238
998.344	-0.0051956	-0.0813448	-0.128657	-0.0572323
998.675	-0.0141788	-0.0489074	-0.118905	-0.0488947
999.007	0.0352289	-0.0599965	-0.138544	-0.0568665
999.338	-0.0111556	-0.0516231	-0.120478	-0.0576369
999.669	-0.0082188	-0.0380447	-0.11886	-0.0510297
1000	-0.0051092	-0.0543388	-0.120433	-0.0555751
1000.33	0.00741547	-0.0381201	-0.131983	-0.0590918
1000.66	0.0104387	-0.0436269	-0.125332	-0.0554374
1000.99	0.0133755	-0.048832	-0.136881	-0.0568837
1001.32	0.00421952	-0.0649752	-0.127039	-0.0540858
1001.66	0.00724272	-0.0544897	-0.143263	-0.0553039
1001.99	0.00715634	-0.0462672	-0.132073	-0.0486967
1002.32	0.00110995	-0.0624859	-0.135219	-0.057581
1002.65	0.0104387	-0.0249943	-0.133421	-0.0538663
1002.98	0.0167442	-0.0380447	-0.143398	-0.0574691
1003.31	0.0043059	-0.0461918	-0.122186	-0.0567072
1003.64	-0.0113283	-0.0411376	-0.148296	-0.059858
1003.97	0.0134619	-0.0732732	-0.148341	-0.0518862
1004.3	0.0537999	-0.0492846	-0.135219	-0.047797
1004.64	0.00724272	-0.0354799	-0.122186	-0.0513912
1004.97	0.0133755	-0.0304257	-0.136881	-0.0606027
1005.3	0.0229633	-0.0381956	-0.133646	-0.0525706
1005.63	0.0102659	-0.0601474	-0.122276	-0.0476808
1005.96	-0.0174611	-0.0301994	-0.138409	-0.0515462
1006.29	0.0260729	-0.0599965	-0.148251	-0.0541762
1006.62	0.0043059	-0.0677664	-0.133646	-0.0619198
1006.95	-0.0051956	-0.062335	-0.120568	-0.0561089
1007.28	0.0104387	-0.0544897	-0.133466	-0.0548993
1007.62	0.0258138	-0.0463426	-0.149959	-0.0566426
1007.95	0.0043059	-0.0653524	-0.140162	-0.0572711
1008.28	-0.0019996	-0.0543388	-0.135174	-0.0630605
1008.61	-0.0298994	-0.0546405	-0.146499	-0.0641065
1008.94	-0.011242	-0.0595439	-0.130275	-0.0519293
1009.27	-0.0174611	-0.0466444	-0.15643	-0.0602239
1009.6	-0.011242	-0.0595439	-0.143488	-0.0637363
1009.93	-0.0082188	-0.0597702	-0.146678	-0.0602497
1010.26	0.00119632	-0.0598456	-0.156475	-0.0614291
1010.6	-0.0018269	-0.0409113	-0.149959	-0.0583472
1010.93	0.00110995	-0.0652015	-0.15315	-0.0625784
1011.26	-0.0082188	-0.0650507	-0.156475	-0.0628711
1011.59	0.0227906	-0.0653524	-0.159801	-0.0599699
1011.92	0.00110995	-0.0760643	-0.16771	-0.0629873
1012.25	0.019681	-0.0516986	-0.156251	-0.0663276
1012.58	-0.0050228	-0.0705575	-0.161194	-0.0674123
1012.91	-0.0019133	-0.0704066	-0.135174	-0.0611924
1013.25	0.0104387	-0.0733486	-0.148161	-0.0657938
1013.58	-0.0050228	-0.0679927	-0.169283	-0.0676792
1013.91	0.013721	-0.0788554	-0.166227	-0.0670636
1014.24	-0.0083052	-0.0707838	-0.169508	-0.0656216
1014.57	0.0227906	-0.0381956	-0.159621	-0.0625698
1014.9	0.044644	-0.0568282	-0.15634	-0.0639731
1015.23	-0.0051956	-0.0301994	-0.154678	-0.0620275
1015.56	0.00724272	-0.0624859	-0.149869	-0.059363
1015.89	0.00102357	-0.0625613	-0.159621	-0.0630605
1016.23	-0.0236803	-0.0761397	-0.16443	-0.0625698
1016.56	0.019681	-0.0543388	-0.175979	-0.0702489
1016.89	0.00421952	-0.0625613	-0.166227	-0.0681656
1017.22	0.0165714	-0.0760643	-0.159711	-0.0686218
1017.55	-0.0237666	-0.0491337	-0.16798	-0.0647177
1017.88	-0.0082188	-0.0650507	-0.182585	-0.0604004
1018.21	0.0168306	-0.065277	-0.189012	-0.065372
1018.54	0.0043059	-0.0785536	-0.172654	-0.0639429
1018.87	-0.0019996	-0.0759888	-0.180833	-0.075496
1019.21	0.00102357	-0.0676155	-0.166272	-0.0703479
1019.54	0.0012827	-0.0784028	-0.177687	-0.0719879
1019.87	0.00421952	-0.0841359	-0.184068	-0.0726206
1020.2	0.00119632	-0.0652015	-0.185641	-0.0705545
1020.53	0.00413314	-0.0816465	-0.188967	-0.0639687
1020.86	0.00119632	-0.0681435	-0.177642	-0.067451
1021.19	0.019681	-0.0651261	-0.190675	-0.0724356
1021.52	0.0290097	-0.0732732	-0.161374	-0.0727239
1021.85	0.0199401	-0.0787045	-0.170901	-0.0698357
1022.19	-0.0083052	-0.070482	-0.169508	-0.0691556
1022.52	0.0258138	-0.0815711	-0.177642	-0.0770886
1022.85	-0.029813	-0.0976389	-0.184024	-0.076034
1023.18	-0.0018269	-0.0973371	-0.177417	-0.0730425
1023.51	-0.0143515	-0.0814956	-0.201955	-0.071876
1023.84	-0.0048501	-0.0598456	-0.184068	-0.0791763
1024.17	-0.011242	-0.0867761	-0.177597	-0.0746351
1024.5	-0.0267035	-0.0896427	-0.193865	-0.0767357
1024.83	-0.0050228	-0.0892655	-0.200292	-0.0690566
1025.17	0.0166578	-0.0786291	-0.176114	-0.0739335
1025.5	-0.0205707	-0.0624859	-0.175844	-0.073757
1025.83	0.00421952	-0.0516231	-0.180833	-0.0736408
1026.16	0.0043059	-0.0597702	-0.197056	-0.0694095
1026.49	0.0320329	-0.0622595	-0.174317	-0.0675457
1026.82	0.0352289	-0.0651261	-0.177462	-0.0696463
1027.15	-0.0082188	-0.0651261	-0.198629	-0.0679805
1027.48	0.0104387	-0.0949986	-0.180923	-0.0742047
1027.81	0.0103523	-0.0977897	-0.187214	-0.0698012
1028.15	0.010525	-0.0571299	-0.184113	-0.0717511
1028.48	-0.0174611	-0.0706329	-0.192247	-0.0719535
1028.81	0.00110995	-0.0731223	-0.195393	-0.0790601
1029.14	0.0136346	-0.0732732	-0.198764	-0.0765764
1029.47	0.00741547	-0.0787045	-0.203572	-0.0823142
1029.8	-0.0113283	-0.0571299	-0.193955	-0.0799166
1030.13	0.010525	-0.0870024	-0.202179	-0.0805838
1030.46	0.00421952	-0.0649752	-0.184113	-0.0764042
1030.79	0.00110995	-0.0759888	-0.208516	-0.0794991
1031.13	-0.002086	-0.0734995	-0.198674	-0.0775191
1031.46	0.0166578	-0.0896427	-0.206853	-0.081944
1031.79	-0.0051092	-0.0760643	-0.202044	-0.0816212
1032.12	-0.0051092	-0.0897181	-0.206808	-0.0795852
1032.45	-0.0051092	-0.0759888	-0.19391	-0.0865498
1032.78	-0.0143515	-0.097488	-0.21328	-0.0791591
1033.11	-0.0175475	-0.0678418	-0.203662	-0.0790816
1033.44	-0.0111556	-0.10571	-0.210179	-0.0780571
1033.77	0.00421952	-0.111066	-0.206943	-0.078918
1034.11	0.0134619	-0.0840604	-0.210134	-0.0790385
1034.44	-0.0174611	-0.0784028	-0.208696	-0.0842985
1034.77	-0.0142652	-0.0894918	-0.205235	-0.0816599
1035.1	0.00421952	-0.083985	-0.210179	-0.0854866
1035.43	0.0043059	-0.0891901	-0.208516	-0.0837777
1035.76	-0.0141788	-0.0921321	-0.218313	-0.0780442
1036.09	-0.0142652	-0.0841359	-0.19072	-0.0855081
1036.42	-0.0297267	-0.0814956	-0.213594	-0.0855899
1036.75	-0.008046	-0.0840604	-0.200472	-0.0827705
1037.09	0.00421952	-0.0977897	-0.201999	-0.080614
1037.42	-0.0051092	-0.073424	-0.208426	-0.0856587
1037.75	-0.0082188	-0.0919058	-0.205235	-0.0820516
1038.08	0.0135482	-0.0761397	-0.206943	-0.0797143
1038.41	0.022877	-0.0757625	-0.215077	-0.084927
1038.74	-0.008046	-0.0706329	-0.20528	-0.0801405
1039.07	0.00119632	-0.0652015	-0.211707	-0.0846085
1039.4	-0.0144379	-0.0975634	-0.224829	-0.0854995
1039.74	0.0197674	-0.0789308	-0.203617	-0.081406
1040.07	0.00102357	-0.0923584	-0.221773	-0.0801749
1040.4	-0.0082188	-0.105484	-0.218358	-0.0780055
1040.73	-0.0048501	-0.0922075	-0.221414	-0.0835151
1041.06	-0.0082188	-0.0948477	-0.21683	-0.0815179
1041.39	0.00741547	-0.0866253	-0.203662	-0.0823142
1041.72	-0.0175475	-0.0923584	-0.221549	-0.0812984
1042.05	-0.0113283	-0.0842113	-0.211976	-0.0802954
1042.38	-0.0235075	-0.0759888	-0.231435	-0.0775664
1042.72	-0.0113283	-0.0787045	-0.227975	-0.0832052
1043.05	-0.0082188	-0.108351	-0.218313	-0.080416
1043.38	-0.0019133	-0.0922829	-0.231256	-0.0792538
1043.71	0.0134619	-0.0811185	-0.214897	-0.0771403
1044.04	-0.0050228	-0.0597702	-0.208516	-0.0865067
1044.37	0.0134619	-0.070482	-0.216785	-0.0789998
1044.7	-0.008046	-0.0975634	-0.244378	-0.0828479
1045.03	0.00732909	-0.119138	-0.22802	-0.0880305
1045.36	0.00119632	-0.0813448	-0.229772	-0.0927869
1045.7	0.00110995	-0.0814202	-0.229728	-0.0940481
1046.03	-0.0082188	-0.0867761	-0.221728	-0.0916763
1046.36	-0.0206571	-0.086927	-0.231345	-0.0928041
1046.69	-0.0236803	-0.116498	-0.218358	-0.0924769
1047.02	-0.0113283	-0.108275	-0.223166	-0.0957827
1047.35	0.028837	-0.0922075	-0.224964	-0.0934454
1047.68	0.00110995	-0.0814956	-0.224784	-0.0911469
1048.01	-0.0142652	-0.102919	-0.244423	-0.0950682
1048.34	-0.0050228	-0.102995	-0.228244	-0.0864637
1048.68	-0.0173747	-0.105635	-0.215032	-0.0907724
1049.01	-0.0111556	-0.113782	-0.237727	-0.0949692
1049.34	0.00119632	-0.11084	-0.236154	-0.0960797
1049.67	-0.0049364	-0.0950741	-0.234626	-0.0983267
1050	-0.0051092	-0.108426	-0.218448	-0.0999839
1050.33	0.00724272	-0.140562	-0.246086	-0.099618
1050.66	-0.0113283	-0.0870024	-0.232963	-0.0975131
1050.99	-0.0420786	-0.0922075	-0.246086	-0.0913793
1051.32	-0.0328362	-0.0892655	-0.226582	-0.102442
1051.66	-0.0079596	-0.129925	-0.237907	-0.0942934
1051.99	-0.0019133	-0.100279	-0.236199	-0.0956407
1052.32	-0.0235939	-0.0786291	-0.226447	-0.0904754
1052.65	-0.0081324	-0.110991	-0.245996	-0.0990412
1052.98	-0.008046	-0.083985	-0.242895	-0.0983224
1053.31	-0.0143515	-0.108124	-0.234491	-0.0996782
1053.64	-0.0051092	-0.0919812	-0.23939	-0.0992263
1053.97	-0.0297267	-0.0922075	-0.244468	-0.0954126
1054.3	-0.0329226	-0.108351	-0.236379	-0.0992435
1054.64	0.0198538	-0.121854	-0.241097	-0.101077
1054.97	-0.0051956	-0.108351	-0.233143	-0.0976939
1055.3	-0.0328362	-0.0894918	-0.237862	-0.0980813
1055.63	-0.002086	-0.0977143	-0.242895	-0.0984902
1055.96	-0.0019996	-0.103146	-0.236244	-0.0965102
1056.29	-0.029813	-0.0922829	-0.234626	-0.103363
1056.62	-0.0237666	-0.0894164	-0.236289	-0.103049
1056.95	0.00110995	-0.0895673	-0.239525	-0.105881
1057.28	0.0134619	-0.110916	-0.232873	-0.102412
1057.62	-0.0235939	-0.0733486	-0.246086	-0.0968804
1057.95	-0.029813	-0.12721	-0.244423	-0.0992822
1058.28	-0.0203979	-0.113933	-0.24285	-0.100685
1058.61	-0.0543441	-0.0921321	-0.252602	-0.102209
1058.94	-0.0173747	-0.0839096	-0.259073	-0.0991789
1059.27	-0.0327499	-0.130152	-0.234761	-0.0966824
1059.6	-0.0327499	-0.12472	-0.247704	-0.0957182
1059.93	-0.0205707	-0.0977143	-0.257545	-0.0946205
1060.26	-0.0110692	-0.100279	-0.245861	-0.0987872
1060.6	0.0227906	-0.100279	-0.25422	-0.0979866
1060.93	0.0103523	-0.0867761	-0.236379	-0.0972118
1061.26	-0.0051956	-0.100279	-0.254355	-0.0989938
1061.59	-0.0204843	-0.0921321	-0.255658	-0.0993898
1061.92	-0.0082188	-0.132716	-0.257411	-0.100879
1062.25	-0.0235939	-0.11084	-0.23139	-0.0996524
1062.58	-0.0051092	-0.113782	-0.25404	-0.106746
1062.91	-0.0235075	-0.105786	-0.25759	-0.104762
1063.25	-0.0359458	-0.119214	-0.260826	-0.101396
1063.58	-0.0298994	-0.0975634	-0.26887	-0.098727
1063.91	-0.0267898	-0.0921321	-0.239614	-0.104542
1064.24	-0.011242	-0.108351	-0.259028	-0.0998289
1064.57	-0.0082188	-0.105937	-0.250939	-0.100578
1064.9	-0.0266171	-0.113631	-0.260826	-0.11031
1065.23	-0.0082188	-0.102844	-0.272106	-0.108782
1065.56	-0.0017405	-0.121627	-0.275387	-0.10852
1065.89	-0.0297267	-0.100354	-0.26887	-0.106733
1066.23	-0.0204843	-0.10556	-0.260826	-0.107534
1066.56	-0.0173747	-0.116347	-0.258894	-0.117081
1066.89	0.00102357	-0.124796	-0.289947	-0.115101
1067.22	-0.0051092	-0.121929	-0.263882	-0.109312
1067.55	-0.0266171	-0.124419	-0.270443	-0.110667
1067.88	-0.0329226	-0.119364	-0.283521	-0.114744
1068.21	-0.0328362	-0.127134	-0.278577	-0.108554
1068.54	-0.0203979	-0.146144	-0.26887	-0.109643
1068.87	-0.0236803	-0.116724	-0.267253	-0.110203
1069.21	-0.0235939	-0.116271	-0.26559	-0.115243
1069.54	-0.0297267	-0.113556	-0.275297	-0.112553
1069.87	-0.0235939	-0.119289	-0.26896	-0.105868
1070.2	-0.0237666	-0.111066	-0.270533	-0.111429
1070.53	-0.0049364	-0.113782	-0.28024	-0.111416
1070.86	-0.033009	-0.108275	-0.267163	-0.10694
1071.19	-0.0113283	-0.140864	-0.26878	-0.104159
1071.52	-0.011242	-0.121778	-0.264062	-0.10412
1071.85	-0.0329226	-0.111066	-0.286667	-0.108898
1072.19	-0.029813	-0.0946969	-0.27696	-0.112105
1072.52	-0.0142652	-0.124569	-0.270533	-0.105571
1072.85	0.00724272	-0.127285	-0.272241	-0.104654
1073.18	-0.0017405	-0.116422	-0.263972	-0.112531
1073.51	-0.0019996	-0.119364	-0.262354	-0.108033
1073.84	-0.0082188	-0.110916	-0.270578	-0.111205
1074.17	-0.0357731	-0.118987	-0.249321	-0.107956
1074.5	-0.0204843	-0.108351	-0.273859	-0.11452
1074.83	-0.0328362	-0.130152	-0.273679	-0.106492
1075.17	-0.0269626	-0.116498	-0.273679	-0.110289
1075.5	-0.0081324	-0.110991	-0.283431	-0.11517
1075.83	-0.0206571	-0.113631	-0.272151	-0.108735
1076.16	-0.0235939	-0.105484	-0.281813	-0.111963
1076.49	-0.0235075	-0.121703	-0.296598	-0.111675
1076.82	-0.038969	-0.121854	-0.278622	-0.112428
1077.15	-0.0543441	-0.129925	-0.273634	-0.113771
1077.48	-0.0174611	-0.127436	-0.277094	-0.111218
1077.81	-0.0235075	-0.0975634	-0.283521	-0.111636
1078.15	-0.0173747	-0.138148	-0.290037	-0.111731
1078.48	-0.0297267	-0.100279	-0.277094	-0.11904
1078.81	-0.0203979	-0.119214	-0.26887	-0.12105
1079.14	-0.0082188	-0.0947723	-0.285184	-0.115028
1079.47	-0.0172884	-0.116347	-0.290037	-0.121209
1079.8	-0.0206571	-0.145993	-0.273724	-0.113582
1080.13	-0.0205707	-0.116347	-0.277004	-0.120047
1080.46	-0.0297267	-0.113707	-0.272061	-0.117279
1080.79	-0.0361186	-0.102995	-0.286712	-0.115488
1081.13	-0.0420786	-0.140864	-0.290172	-0.121558
1081.46	-0.0235939	-0.135432	-0.285139	-0.115915
1081.79	-0.0236803	-0.137997	-0.278577	-0.121338
1082.12	-0.0205707	-0.119138	-0.272106	-0.11452
1082.45	-0.0390554	-0.113556	-0.296463	-0.10774
1082.78	0.00724272	-0.0975634	-0.275342	-0.115652
1083.11	0.00741547	-0.12985	-0.281858	-0.111257
1083.44	-0.0357731	-0.124419	-0.29507	-0.117378
1083.77	-0.0144379	-0.121703	-0.273859	-0.113526
1084.11	-0.008046	-0.138072	-0.288329	-0.111261
1084.44	-0.0203116	-0.13249	-0.293318	-0.113483
1084.77	-0.0143515	-0.110916	-0.285228	-0.112174
1085.1	-0.017202	-0.129925	-0.304688	-0.115579
1085.43	-0.0327499	-0.140637	-0.296509	-0.119272
1085.76	-0.0296403	-0.121778	-0.290082	-0.122264
1086.09	-0.0140924	-0.121929	-0.28024	-0.115075
1086.42	-0.0235075	-0.132566	-0.307968	-0.123555
1086.75	-0.008046	-0.118987	-0.304643	-0.126602
1087.09	-0.0451018	-0.151651	-0.296643	-0.119453
1087.42	-0.0329226	-0.143428	-0.280195	-0.121885
1087.75	-0.0173747	-0.143277	-0.298081	-0.12145
1088.08	-0.0327499	-0.151575	-0.30307	-0.129241
1088.41	-0.0173747	-0.140713	-0.293183	-0.12405
1088.74	-0.0328362	-0.130001	-0.301362	-0.119134
1089.07	-0.0175475	-0.140864	-0.2917	-0.112992
1089.4	0.0104387	-0.121778	-0.291655	-0.113749
1089.74	-0.0142652	-0.0867761	-0.296598	-0.116358
1090.07	-0.0237666	-0.105786	-0.299744	-0.123766
1090.4	-0.0144379	-0.121778	-0.293453	-0.12439
1090.73	-0.0173747	-0.140637	-0.299924	-0.116478
1091.06	-0.0203979	-0.140788	-0.312867	-0.121205
1091.39	-0.0051092	-0.148709	-0.293408	-0.119677
1091.72	-0.0390554	-0.127134	-0.301362	-0.122754
1092.05	-0.0203979	-0.132867	-0.298306	-0.123723
1092.38	-0.0235939	-0.138072	-0.296509	-0.122268
1092.72	-0.0235939	-0.140562	-0.288509	-0.122186
1093.05	-0.0175475	-0.13249	-0.301452	-0.123964
1093.38	-0.042165	-0.113782	-0.304733	-0.122255
1093.71	-0.0266171	-0.135281	-0.306215	-0.129185
1094.04	-0.0267898	-0.132641	-0.304822	-0.126994
1094.37	-0.0019133	-0.146219	-0.296553	-0.129245
1094.7	-0.0173747	-0.146219	-0.30644	-0.133868
1095.03	-0.0267898	-0.127436	-0.316147	-0.131144
1095.36	-0.0361186	-0.132867	-0.301407	-0.131677
1095.7	-0.033009	-0.129925	-0.309676	-0.125358
1096.03	0.0166578	-0.121929	-0.307923	-0.125862
1096.36	-0.0235939	-0.127511	-0.299924	-0.12439
1096.69	-0.0235939	-0.12721	-0.306305	-0.126973
1097.02	-0.0111556	-0.140637	-0.298261	-0.122987
1097.35	-0.0267035	-0.0974126	-0.309631	-0.122548
1097.68	-0.0173747	-0.135432	-0.30644	-0.120761
1098.01	-0.0113283	-0.129925	-0.299834	-0.127937
1098.34	-0.0142652	-0.148633	-0.313001	-0.124459
1098.68	-0.0267898	-0.141014	-0.309496	-0.126159
1099.01	-0.0113283	-0.121929	-0.30644	-0.128918
1099.34	-0.0174611	-0.127134	-0.319383	-0.131699
1099.67	-0.0206571	-0.145993	-0.314529	-0.125238
1100	-0.0111556	-0.121778	-0.312822	-0.130946
1100.33	-0.0390554	-0.148709	-0.301362	-0.12829
1100.66	-0.033009	-0.140713	-0.324326	-0.131406
1100.99	0.00110995	-0.130076	-0.324326	-0.126809
1101.32	-0.038969	-0.127285	-0.320956	-0.128445
1101.66	-0.0143515	-0.111142	-0.314574	-0.134299
1101.99	-0.0482113	-0.143504	-0.304688	-0.127743
1102.32	-0.0298994	-0.140713	-0.316102	-0.129525
1102.65	-0.0206571	-0.121778	-0.322619	-0.133334
1102.98	-0.0236803	-0.113782	-0.327562	-0.134299
1103.31	-0.0174611	-0.146068	-0.321001	-0.128729
1103.64	-0.0359458	-0.151424	-0.319293	-0.136369
1103.97	-0.0359458	-0.137922	-0.319383	-0.135482
1104.3	-0.0329226	-0.116498	-0.320911	-0.130571
1104.64	-0.0422513	-0.162514	-0.321046	-0.131359
1104.97	-0.0174611	-0.143504	-0.324371	-0.130907
1105.3	-0.0358594	-0.140788	-0.329045	-0.141444
1105.63	-0.0359458	-0.132566	-0.327472	-0.137381
1105.96	-0.0453609	-0.135281	-0.327562	-0.136834
1106.29	-0.0175475	-0.12736	-0.325809	-0.134914
1106.62	-0.0082188	-0.132716	-0.316237	-0.134053
1106.95	-0.042165	-0.156856	-0.324192	-0.127351
1107.28	-0.0236803	-0.14886	-0.314485	-0.130666
1107.62	-0.0143515	-0.130152	-0.327517	-0.130649
1107.95	-0.0206571	-0.151424	-0.319473	-0.125896
1108.28	-0.0235939	-0.12208	-0.313001	-0.129133
1108.61	-0.0144379	-0.132641	-0.319383	-0.126577
1108.94	-0.0267035	-0.137922	-0.329135	-0.127399
1109.27	-0.0451018	-0.14886	-0.324281	-0.132564
1109.6	0.00110995	-0.124419	-0.332281	-0.130024
1109.93	-0.0175475	-0.119063	-0.34046	-0.132052
1110.26	-0.0360322	-0.135281	-0.322529	-0.129172
1110.6	-0.0514073	-0.132641	-0.325764	-0.128561
1110.93	-0.0388826	-0.127134	-0.312867	-0.133515
1111.26	-0.0298994	-0.127134	-0.319518	-0.135203
1111.59	-0.0175475	-0.135357	-0.322619	-0.136468
1111.92	-0.0482113	-0.135357	-0.319383	-0.146145
1112.25	-0.0204843	-0.116271	-0.314485	-0.14045
1112.58	-0.0235075	-0.145993	-0.316057	-0.137355
1112.91	-0.0419922	-0.127285	-0.329225	-0.14184
1113.25	-0.0359458	-0.151726	-0.333989	-0.139959
1113.58	-0.0267898	-0.143353	-0.320956	-0.13587
1113.91	-0.0143515	-0.122005	-0.338932	-0.139899
1114.24	-0.0172884	-0.143655	-0.338842	-0.144642
1114.57	-0.0360322	-0.129774	-0.348594	-0.143196
1114.9	-0.0454473	-0.135281	-0.343785	-0.138767
1115.23	-0.0361186	-0.119063	-0.346976	-0.141814
1115.56	-0.042165	-0.165078	-0.337314	-0.144509
1115.89	-0.029813	-0.15414	-0.350392	-0.145559
1116.23	-0.0422513	-0.167643	-0.322753	-0.140445
1116.56	-0.0267898	-0.137846	-0.321091	-0.143304
1116.89	-0.0544305	-0.127059	-0.33246	-0.146269
1117.22	-0.0359458	-0.146144	-0.337269	-0.149407
1117.55	-0.0360322	-0.15414	-0.334168	-0.154168
1117.88	-0.0513209	-0.159496	-0.330843	-0.154848
1118.21	-0.0235939	-0.162514	-0.342302	-0.145882
1118.54	0.00110995	-0.154442	-0.352054	-0.144492
1118.87	-0.0544305	-0.135206	-0.335741	-0.144724
1119.21	-0.0265307	-0.157082	-0.34064	-0.146076
1119.54	-0.029813	-0.157007	-0.324371	-0.14379
1119.87	-0.0606496	-0.15678	-0.342168	-0.147191
1120.2	-0.0359458	-0.165003	-0.337404	-0.148641
1120.53	-0.0482977	-0.146068	-0.364997	-0.150884
1120.86	-0.0297267	-0.151575	-0.342302	-0.147578
1121.19	-0.0328362	-0.151726	-0.348774	-0.147195
1121.52	-0.0454473	-0.162514	-0.335651	-0.143773
1121.85	-0.0451018	-0.14901	-0.332416	-0.14339
1122.19	-0.0357731	-0.159798	-0.34055	-0.145008
1122.52	-0.0391418	-0.140788	-0.335741	-0.147104
1122.85	-0.033009	-0.138223	-0.34055	-0.147587
1123.18	-0.0144379	-0.140713	-0.338932	-0.142908
1123.51	-0.0079596	-0.148784	-0.347111	-0.147087
1123.84	-0.0174611	-0.146446	-0.343965	-0.143088
1124.17	-0.029813	-0.146219	-0.343875	-0.150746
1124.5	-0.0204843	-0.151726	-0.343875	-0.145172
1124.83	-0.0390554	-0.14886	-0.366615	-0.144272
1125.17	-0.0206571	-0.14901	-0.334123	-0.14648
1125.5	-0.0451018	-0.154291	-0.329225	-0.148086
1125.83	-0.0359458	-0.162438	-0.353537	-0.150165
1126.16	-0.0420786	-0.17051	-0.347021	-0.153199
1126.49	-0.0111556	-0.156931	-0.360099	-0.147113
1126.82	-0.0451882	-0.157007	-0.342257	-0.140742
1127.15	-0.0420786	-0.15414	-0.3552	-0.153931
1127.48	-0.0514073	-0.159722	-0.34055	-0.148762
1127.81	-0.0422513	-0.151651	-0.351919	-0.149455
1128.15	-0.0204843	-0.173301	-0.351965	-0.152128
1128.48	-0.0575401	-0.173225	-0.34392	-0.151348
1128.81	-0.0297267	-0.165305	-0.353582	-0.156101
1129.14	-0.0419922	-0.15414	-0.35183	-0.148232
1129.47	-0.042165	-0.173074	-0.351965	-0.156583
1129.8	-0.0110692	-0.14901	-0.345268	-0.145172
1130.13	-0.0142652	-0.165003	-0.335561	-0.15134
1130.46	-0.0328362	-0.154291	-0.342212	-0.150281
1130.79	-0.0422513	-0.162514	-0.337314	-0.152485
1131.13	-0.0419922	-0.146219	-0.335651	-0.149338
1131.46	-0.0390554	-0.151575	-0.348639	-0.142292
1131.79	-0.0420786	-0.154366	-0.342212	-0.148193
1132.12	-0.0638456	-0.159722	-0.34392	-0.147487
1132.45	-0.0174611	-0.1515	-0.352054	-0.139757
1132.78	-0.0358594	-0.154442	-0.355245	-0.148176
1133.11	-0.0761975	-0.162061	-0.347021	-0.14818
1133.44	-0.0359458	-0.146219	-0.356863	-0.150505
1133.77	-0.0297267	-0.138072	-0.337179	-0.145163
1134.11	-0.0329226	-0.143579	-0.350257	-0.147419
1134.44	-0.0453609	-0.173301	-0.347066	-0.148555
1134.77	-0.0142652	-0.145993	-0.335696	-0.148189
1135.1	-0.0359458	-0.140562	-0.353672	-0.149709
1135.43	-0.0390554	-0.143428	-0.358391	-0.152954
1135.76	-0.029813	-0.159798	-0.363244	-0.147815
1136.09	-0.0298994	-0.173225	-0.345538	-0.15403
1136.42	-0.0422513	-0.132867	-0.358526	-0.153707
1136.75	-0.0235939	-0.173074	-0.353582	-0.163784
1137.09	-0.0328362	-0.162438	-0.356818	-0.156806
1137.42	-0.0296403	-0.172999	-0.353537	-0.159725
1137.75	-0.0419922	-0.146219	-0.358481	-0.150587
1138.08	-0.0235939	-0.165078	-0.355245	-0.159802
1138.41	-0.0267898	-0.173074	-0.3552	-0.157986
1138.74	-0.0545169	-0.130001	-0.368323	-0.160625
1139.07	-0.0452745	-0.159647	-0.350347	-0.157246
1139.4	-0.0482113	-0.151651	-0.361671	-0.15542
1139.74	-0.0420786	-0.14886	-0.343695	-0.15032
1140.07	-0.0235939	-0.156931	-0.358481	-0.154155
1140.4	-0.029813	-0.162438	-0.335606	-0.151504
1140.73	-0.0173747	-0.146295	-0.368233	-0.148366
1141.06	-0.042165	-0.167643	-0.337314	-0.154844
1141.39	-0.0451018	-0.159798	-0.358436	-0.153707
1141.72	-0.0390554	-0.149086	-0.360144	-0.156113
1142.05	-0.0390554	-0.129925	-0.356863	-0.157521
1142.38	-0.0482113	-0.1515	-0.371513	-0.156036
1142.72	-0.0451882	-0.143353	-0.345313	-0.154271
1143.05	-0.0360322	-0.154442	-0.368368	-0.153441
1143.38	-0.0174611	-0.143579	-0.347066	-0.149558
1143.71	-0.0483841	-0.181448	-0.364862	-0.152463
1144.04	-0.0515801	-0.149086	-0.373131	-0.153707
1144.37	-0.0514073	-0.16802	-0.369806	-0.152618
1144.7	-0.008046	-0.154442	-0.358481	-0.162028
1145.03	-0.042165	-0.172999	-0.368143	-0.157065
1145.36	-0.0451018	-0.176016	-0.348774	-0.163573
1145.7	-0.0699784	-0.159873	-0.36648	-0.157857
1146.03	-0.0359458	-0.149086	-0.373086	-0.15901
1146.36	-0.0545169	-0.170283	-0.37803	-0.161563
1146.69	-0.0267035	-0.162287	-0.360054	-0.160715
1147.02	-0.0482113	-0.162438	-0.363379	-0.157943
1147.35	-0.033009	-0.140788	-0.371513	-0.15372
1147.68	-0.0234211	-0.157007	-0.358436	-0.153557
1148.01	-0.038969	-0.15678	-0.381131	-0.155588
1148.34	-0.0390554	-0.164852	-0.364862	-0.154426
1148.68	-0.0482113	-0.154291	-0.369896	-0.152063
1149.01	-0.0327499	-0.148935	-0.374749	-0.152988
1149.34	-0.0326635	-0.1515	-0.363289	-0.158141
1149.67	-0.0297267	-0.164852	-0.363379	-0.155847
1150	-0.0297267	-0.157233	-0.358436	-0.15533
1150.33	-0.0298994	-0.178581	-0.369985	-0.158266
1150.66	-0.0638456	-0.164928	-0.368233	-0.163857
1150.99	-0.0081324	-0.154216	-0.369985	-0.161352
1151.32	-0.0576264	-0.162212	-0.368278	-0.1622
1151.66	-0.0514937	-0.148784	-0.373086	-0.157586
1151.99	-0.0360322	-0.162363	-0.371513	-0.155167
1152.32	-0.0019133	-0.156856	-0.373131	-0.159191
1152.65	-0.0513209	-0.143504	-0.381265	-0.173314
1152.98	-0.0545169	-0.181372	-0.379737	-0.163819
1153.31	-0.0451018	-0.162287	-0.381265	-0.15966
1153.64	-0.0452745	-0.140788	-0.369941	-0.170714
1153.97	-0.0266171	-0.156931	-0.381355	-0.161554
1154.3	-0.0206571	-0.175715	-0.384501	-0.167344
1154.64	-0.0605633	-0.181297	-0.379737	-0.168734
1154.97	-0.0360322	-0.159496	-0.381355	-0.167675
1155.3	-0.0543441	-0.167568	-0.361716	-0.173245
1155.63	-0.063932	-0.181448	-0.37803	-0.175656
1155.96	-0.0296403	-0.167869	-0.381176	-0.1717
1156.29	-0.0636728	-0.189595	-0.374704	-0.169031
1156.62	-0.0142652	-0.186578	-0.37803	-0.166315
1156.95	-0.038969	-0.162438	-0.387692	-0.171132
1157.28	-0.0235939	-0.173376	-0.360189	-0.173413
1157.62	-0.0763703	-0.170283	-0.379603	-0.167589
1157.95	-0.0483841	-0.173225	-0.384456	-0.17195
1158.28	-0.0451018	-0.17315	-0.381221	-0.173254
1158.61	-0.0730016	-0.178355	-0.37794	-0.168683
1158.94	-0.0297267	-0.175866	-0.391107	-0.176047
1159.27	-0.0577128	-0.17051	-0.386164	-0.169543
1159.6	-0.0667824	-0.17051	-0.382883	-0.179685
1159.93	-0.0574537	-0.178506	-0.397444	-0.1751
1160.26	-0.0667824	-0.178732	-0.373086	-0.173581
1160.6	-0.0545169	-0.178506	-0.387602	-0.176999
1160.93	-0.0576264	-0.186728	-0.379737	-0.173116
1161.26	-0.0637592	-0.181222	-0.386119	-0.177877
1161.59	-0.0761975	-0.165003	-0.387872	-0.181238
1161.92	-0.0730016	-0.186578	-0.384501	-0.181596
1162.25	-0.0698056	-0.186728	-0.371648	-0.182276
1162.58	-0.0543441	-0.165229	-0.386119	-0.175182
1162.91	-0.0422513	-0.19744	-0.386074	-0.171876
1163.25	-0.0577128	-0.181448	-0.386164	-0.170736
1163.58	-0.0482113	-0.162212	-0.3894	-0.177885
1163.91	-0.0267898	-0.143353	-0.386164	-0.168454
1164.24	-0.0792207	-0.154291	-0.384546	-0.170124
1164.57	-0.0390554	-0.175866	-0.394298	-0.180554
1164.9	-0.0605633	-0.17051	-0.386209	-0.176138
1165.23	-0.0452745	-0.154216	-0.391062	-0.164662
1165.56	-0.0360322	-0.151424	-0.387827	-0.171661
1165.89	-0.0512345	-0.194724	-0.384456	-0.174489
1166.23	-0.0419922	-0.183937	-0.369851	-0.170305
1166.56	-0.0482113	-0.184239	-0.389534	-0.176723
1166.89	-0.0391418	-0.162287	-0.384501	-0.179112
1167.22	-0.0577128	-0.167568	-0.387827	-0.180016
1167.55	-0.0636728	-0.164928	-0.386119	-0.174054
1167.88	-0.0605633	-0.151575	-0.376322	-0.175845
1168.21	-0.0762839	-0.175715	-0.387782	-0.178027
1168.54	-0.0670415	-0.170359	-0.394163	-0.188104
1168.87	-0.0730879	-0.183786	-0.402432	-0.177829
1169.21	-0.069892	-0.170434	-0.386164	-0.18197
1169.54	-0.0606496	-0.17051	-0.374704	-0.178122
1169.87	-0.069892	-0.181222	-0.396006	-0.179052
1170.2	-0.0854399	-0.165003	-0.386119	-0.173422
1170.53	-0.0267898	-0.173225	-0.384546	-0.181432
1170.86	-0.0452745	-0.178581	-0.39277	-0.179396
1171.19	-0.042165	-0.162438	-0.400814	-0.180507
1171.52	-0.0699784	-0.181146	-0.386029	-0.178987
1171.85	-0.0544305	-0.178506	-0.376367	-0.176529
1172.19	-0.0577128	-0.183937	-0.395826	-0.178397
1172.52	-0.0606496	-0.17843	-0.381221	-0.178169
1172.85	-0.0668688	-0.167794	-0.389534	-0.177605
1173.18	-0.060736	-0.175866	-0.39277	-0.179775
1173.51	-0.0822439	-0.178355	-0.379692	-0.180188
1173.84	-0.0420786	-0.165154	-0.36666	-0.183025
1174.17	-0.0574537	-0.192235	-0.384501	-0.191337
1174.5	-0.0608224	-0.184013	-0.386254	-0.183261
1174.83	-0.0574537	-0.186578	-0.386164	-0.183761
1175.17	-0.063932	-0.197666	-0.384591	-0.183434
1175.5	-0.0574537	-0.192009	-0.397534	-0.182461
1175.83	-0.0791343	-0.19216	-0.382973	-0.185087
1176.16	-0.0513209	-0.175715	-0.387782	-0.184665
1176.49	-0.0451018	-0.183786	-0.387692	-0.183042
1176.82	-0.0576264	-0.189595	-0.390972	-0.181273
1177.15	-0.0545169	-0.184013	-0.407241	-0.18358
1177.48	-0.0574537	-0.175715	-0.382928	-0.191909
1177.81	-0.0390554	-0.194951	-0.400814	-0.183373
1178.15	-0.0451882	-0.205361	-0.392635	-0.180606
1178.48	-0.0546032	-0.19744	-0.395916	-0.180356
1178.81	-0.0576264	-0.178808	-0.395916	-0.187351
1179.14	-0.0328362	-0.192084	-0.386164	-0.189679
1179.47	-0.0732607	-0.200156	-0.384501	-0.190355
1179.8	-0.0761111	-0.205663	-0.400814	-0.188203
1180.13	-0.0791343	-0.178581	-0.404005	-0.190523
1180.46	-0.0699784	-0.208303	-0.390927	-0.194793
1180.79	-0.0513209	-0.183862	-0.412139	-0.190708
1181.13	-0.0482113	-0.191782	-0.3925	-0.189933
1181.46	-0.0574537	-0.183786	-0.397489	-0.189766
1181.79	-0.0730016	-0.175866	-0.384546	-0.186925
1182.12	-0.0822439	-0.192084	-0.387872	-0.191926
1182.45	-0.0792207	-0.194951	-0.400814	-0.185465
1182.78	-0.0574537	-0.184164	-0.400724	-0.184475
1183.11	-0.0793071	-0.170359	-0.394298	-0.188401
1183.44	-0.0420786	-0.178581	-0.395826	-0.193394
1183.77	-0.0730016	-0.183786	-0.41542	-0.188397
1184.11	-0.0451018	-0.202645	-0.392545	-0.190575
1184.44	-0.0390554	-0.183937	-0.402342	-0.185724
1184.77	-0.0420786	-0.183862	-0.397579	-0.181475
1185.1	-0.0391418	-0.194649	-0.404005	-0.181712
1185.43	-0.0668688	-0.200231	-0.39268	-0.184768
1185.76	-0.0451882	-0.154291	-0.389445	-0.189688
1186.09	-0.0699784	-0.170359	-0.394388	-0.189563
1186.42	-0.0423377	-0.200156	-0.395961	-0.181428
1186.75	-0.060736	-0.178506	-0.394298	-0.185788
1187.09	-0.0636728	-0.194724	-0.389534	-0.189593
1187.42	-0.0606496	-0.181146	-0.394298	-0.189628
1187.75	-0.0730879	-0.170585	-0.399241	-0.189593
1188.08	-0.0452745	-0.181146	-0.408814	-0.189563
1188.41	-0.0604769	-0.186502	-0.387737	-0.189115
1188.74	-0.0730016	-0.167643	-0.408948	-0.189877
1189.07	-0.0451018	-0.200156	-0.399197	-0.189929
1189.4	-0.0794798	-0.208303	-0.397534	-0.184661
1189.74	-0.0668688	-0.22173	-0.399241	-0.195998
1190.07	-0.101161	-0.19993	-0.412094	-0.191517
1190.4	-0.0482113	-0.194875	-0.412139	-0.194574
1190.73	-0.0824167	-0.200307	-0.402522	-0.192697
1191.06	-0.0668688	-0.221655	-0.40405	-0.194401
1191.39	-0.0453609	-0.192084	-0.410656	-0.194595
1191.72	-0.0730879	-0.172999	-0.394253	-0.199136
1192.05	-0.0823303	-0.186653	-0.40396	-0.19506
1192.38	-0.0667824	-0.181523	-0.402342	-0.197604
1192.72	-0.091659	-0.200005	-0.400724	-0.194014
1193.05	-0.0730016	-0.205814	-0.410656	-0.191862
1193.38	-0.0761111	-0.208303	-0.38931	-0.197221
1193.71	-0.0824167	-0.192311	-0.395916	-0.191866
1194.04	-0.0636728	-0.183862	-0.400814	-0.190243
1194.37	-0.0636728	-0.205663	-0.396006	-0.192223
1194.7	-0.0822439	-0.175941	-0.39268	-0.198379
1195.03	-0.0635865	-0.189369	-0.394343	-0.193175
1195.36	-0.104184	-0.189444	-0.410521	-0.194488
1195.7	-0.0667824	-0.19216	-0.408859	-0.193196
1196.03	-0.069892	-0.186351	-0.400814	-0.196231
1196.36	-0.0545169	-0.189067	-0.405668	-0.200518
1196.69	-0.0700647	-0.192009	-0.418611	-0.199997
1197.02	-0.0576264	-0.189369	-0.407331	-0.200763
1197.35	-0.0730879	-0.186653	-0.402432	-0.198516
1197.68	-0.0729152	-0.208077	-0.405578	-0.200273
1198.01	-0.094855	-0.19744	-0.413712	-0.198994
1198.34	-0.0792207	-0.210943	-0.397444	-0.200122
1198.68	-0.0574537	-0.210868	-0.410476	-0.201934
1199.01	-0.0543441	-0.202721	-0.413937	-0.194371
1199.34	-0.0576264	-0.197516	-0.412229	-0.199351
1199.67	-0.0700647	-0.170585	-0.400904	-0.193325
1200	-0.0761975	-0.202645	-0.404095	-0.199691

## Sheet: Figure 2E
	▵F/F0
Time(s)	C1	C2	C3	C4
0.331126	-0.0002569	0.00979828	-0.0056166	0.0388355
0.662252	-0.0051622	0.0124395	-0.0050867	0.0513903
0.993377	-0.0082621	0.00174783	-0.0078904	0.0357007
1.3245	-0.0044852	0.00723208	-0.0027334	0.0297778
1.65563	-0.0064367	0.00202462	-0.0026186	0.0268005
1.98675	-0.0050461	0.00288784	-0.0092812	0.0283128
2.31788	-0.0038147	-0.0052142	-0.0111224	0.0346296
2.64901	-0.0093241	0.00228734	-0.011979	0.0258396
2.98013	-0.0111562	0.00158363	-0.0047247	0.0272574
3.31126	-0.0063935	-0.0019771	0.00199981	0.0237918
3.64238	-0.0035426	-0.0048483	0.0151132	0.0127807
3.97351	0.00018121	0.00271426	0.00950137	0.0017223
4.30464	-0.0093075	0.00075794	0.00161596	0.00204365
4.63576	-0.0096627	0.00042955	0.0018279	0.0022122
4.96689	-0.0044387	0.00032634	0.00229415	0.00156635
5.29801	-0.0088495	-0.0052471	0.00325712	0.00118356
5.62914	0.00484427	-0.0002976	0.00269108	0.00082912
5.96026	-0.0035094	4.016e-05	0.00305667	0.00359685
6.29139	-0.000612	-0.0023337	0.0032218	0.00354645
6.62252	0.001303	-0.0007152	0.00332114	0.00443962
6.95364	-0.0012293	-0.0024181	0.00328052	0.00343933
7.28477	-0.0001938	-0.0038955	0.00322136	0.00220905
7.61589	-0.0009539	-0.0034217	0.00304033	0.00111897
7.94702	-0.0016442	-0.0024158	0.00325845	0.00199954
8.27815	-0.003297	-0.0035897	0.00252374	0.00229884
8.60927	-0.006513	-0.0038929	0.00253302	0.0022185
8.9404	-0.0063272	-0.003867	0.00260145	0.0095357
9.27152	0.00702147	-0.0089853	0.0028805	0.0192235
9.60265	0.00267703	-0.0023611	0.00278425	0.0207673
9.93377	0.0017245	0.00426321	0.00310038	0.00287236
10.2649	0.0049372	-0.0008551	0.00357855	0.00556605
10.596	-0.0012194	0.00461037	0.0023617	-0.0079024
10.9272	-0.0001872	0.00101676	0.00218333	-0.0029403
11.2583	-0.0035127	0.00355012	0.00215154	-0.0022945
11.5894	0.00039694	0.00775361	0.0015855	-0.0096982
11.9205	-0.0026664	0.00573162	0.00179037	-0.0020898
12.2517	0.00075206	0.00670274	0.00105169	-0.0014471
12.5828	-0.0017736	0.00393012	0.00207648	-0.0017685
12.9139	0.00116029	0.00067898	0.00190649	-0.006777
13.245	0.00231859	0.00303406	0.0023021	-0.0029042
13.5762	0.00146563	-0.0035386	0.00187337	-0.001592
13.9073	0.00833244	0.00139676	0.00153295	-0.0095722
14.2384	0.00192032	0.00430543	0.00168926	-0.0027514
14.5695	0.00192364	0.00325925	0.00095014	-0.0023813
14.9007	0.00523258	-0.0062174	0.0009965	-0.0027105
15.2318	0.00340719	0.00469013	0.00062826	-0.0027577
15.5629	0.00959362	0.00633212	0.00089274	-0.0016125
15.894	0.00358309	-0.0010615	0.00086271	-0.0020678
16.2252	0.00676592	-0.0033369	0.00113116	-0.0008911
16.5563	0.0071841	0.0003412	0.00192106	-0.0016204
16.8874	0.00955379	-1.277e-06	0.00117134	-0.002575
17.2185	0.00979275	-0.0004094	0.00167292	-0.0020363
17.5497	0.00247789	0.00475581	0.00081061	-0.0021875
17.8808	0.00447587	0.00618199	0.00102873	-0.0026727
18.2119	0.00133951	0.0019738	0.00225148	-0.0020678
18.543	0.00250444	0.00640718	8.799e-05	-0.0033926
18.8742	0.00383532	0.00183306	0.00656521	-0.0022442
19.2053	0.00743633	0.00789436	0.00470196	-0.0096509
19.5364	0.00344037	0.00622891	0.00960292	-0.0017165
19.8675	0.00819636	0.00254146	0.00115236	-0.0028412
20.1987	0.00678583	0.00195035	0.00029551	-0.0010769
20.5298	0.00544831	0.00466667	0.00567774	-0.0023844
20.8609	-0.0011961	0.00169701	0.00123596	-0.002345
21.1921	0.00602248	0.00027552	0.00491831	-0.0023056
21.5232	0.00055625	0.00398642	-0.0006317	-0.001863
21.8543	0.00451238	0.010362	0.00625172	-0.0015479
22.1854	0.00415726	0.0100712	0.00084742	-0.0016094
22.5166	0.00090805	0.0119806	0.00769994	-0.0006674
22.8477	0.00072219	0.0134584	0.00328907	-0.0017228
23.1788	-2.487e-05	0.0123981	0.00073262	-0.0088318
23.5099	-0.0013919	0.0122104	-0.0015412	-0.0068942
23.8411	-0.0020391	0.0107749	-0.0033559	-0.0054923
24.1722	-0.0005788	0.0170567	-0.0014088	-0.0067052
24.5033	-0.0025171	0.0103339	-0.0053207	-0.0013021
24.8344	0.00909247	0.00893116	0.00539074	-0.0032554
25.1656	0.00642739	0.0110282	0.00537308	-0.0074503
25.4967	0.00406433	0.00925956	0.0141021	0.00822824
25.8278	0.00795408	0.0090156	0.0140094	-0.0075559
26.1589	0.00882032	0.00386913	0.014005	-0.0001994
26.4901	0.0365531	0.00200195	0.0140182	-0.0083578
26.8212	0.0871995	0.00806794	0.00751891	-0.0029937
27.1523	0.0933826	0.00194096	0.00417859	-0.0045624
27.4834	0.101962	0.0059615	0.00285041	-0.0072685
27.8146	0.107179	0.00081503	0.00864553	-0.0056235
28.1457	0.105653	0.00195035	0.0404348	-0.004207
28.4768	0.111116	-5.969e-06	0.022341	-0.0035206
28.8079	0.111318	0.0031748	0.0257629	-0.0030024
29.1391	0.101398	0.00842449	0.0308095	-0.0027359
29.4702	0.105374	0.00872004	0.0279882	-0.0024129
29.8013	0.105108	0.0109578	0.0317721	-0.0023201
30.1325	0.109748	0.00231628	0.0346243	-0.0020026
30.4636	0.111318	0.00538915	0.0361079	-0.001907
30.7947	0.106824	0.0080351	0.0384082	-0.0018072
31.1258	0.113615	0.00559557	0.0362845	-0.0016451
31.457	0.115311	0.00415062	0.0414327	-0.0015716
31.7881	0.111826	0.00436173	0.0431635	-0.0014629
32.1192	0.113323	0.00833066	0.0616944	-0.0012872
32.4503	0.118301	0.0124779	0.0653988	-0.0009571
32.7815	0.123299	0.00678719	0.0702336	-1.034e-05
33.1126	0.129237	0.00795535	0.076543	-0.0007718
33.4437	0.129386	0.0150112	0.0833426	-0.0008698
33.7748	0.133913	0.00722818	0.0834441	-0.0007181
34.106	0.129137	0.00938622	0.0893297	-0.0006064
34.4371	0.141905	0.0101134	0.0866187	-0.0004467
34.7682	0.142964	0.0134631	0.0926235	-0.000511
35.0993	0.137451	0.0159307	0.0996923	-0.0004708
35.4305	0.139432	0.013327	0.106112	-0.0003942
35.7616	0.138506	0.0127265	0.112373	-0.0003308
36.0927	0.146654	-0.0036613	0.118647	0.00079302
36.4238	0.153671	-0.0111441	0.118899	0.00093479
36.755	0.148858	-0.0031218	0.126524	0.00542428
37.0861	0.154042	-0.0007385	0.134396	0.00350246
37.4172	0.154487	-0.0115991	0.135434	0.00145463
37.7483	0.155735	-0.0046512	0.141143	0.00807071
38.0795	0.159449	-0.012209	0.150459	0.0220118
38.4106	0.154394	-0.0064808	0.147951	0.0124814
38.7417	0.159694	-0.0039803	0.162032	0.00791319
39.0728	0.157889	-0.0011701	0.159961	0.0160573
39.404	0.161244	-3.481e-05	0.163789	0.0204837
39.7351	0.155446	0.0118297	0.164014	0.0213029
40.0662	0.158314	0.0140206	0.162182	0.0160573
40.3974	0.155931	0.0110557	0.167268	0.0263595
40.7285	0.160972	0.0167886	0.176845	0.0464913
41.0596	0.1684	0.018196	0.181583	0.0342988
41.3907	0.162263	0.0279119	0.180134	0.0203105
41.7219	0.159605	0.0287845	0.181022	0.0361891
42.053	0.167484	0.0325141	0.177852	0.0467118
42.3841	0.174331	0.0361547	0.181702	0.0523985
42.7152	0.17668	0.032228	0.196453	0.0567619
43.0464	0.17668	0.0408836	0.202122	0.0662922
43.3775	0.185359	0.0525418	0.201222	0.0649375
43.7086	0.18906	0.055441	0.214706	0.0953873
44.0397	0.184981	0.055624	0.191702	0.099672
44.3709	0.19669	0.052659	0.206706	0.105059
44.702	0.199143	0.0589924	0.218154	0.123096
45.0331	0.20209	0.0577398	0.214609	0.135367
45.3642	0.209402	0.0617885	0.217081	0.155121
45.6954	0.206969	0.0741691	0.221333	0.168558
46.0265	0.206345	0.0732262	0.222662	0.193132
46.3576	0.210228	0.0796956	0.22347	0.191951
46.6887	0.204848	0.0749807	0.238306	0.183491
47.0199	0.206	0.0740659	0.24526	0.173158
47.351	0.210075	0.077744	0.26066	0.18116
47.6821	0.213102	0.0764163	0.250744	0.179947
48.0132	0.215877	0.0878587	0.253216	0.186154
48.3444	0.22129	0.0882433	0.254263	0.209074
48.6755	0.23051	0.0953227	0.260338	0.22125
49.0066	0.228565	0.0954447	0.265318	0.21632
49.3377	0.23049	0.103856	0.273076	0.209593
49.6689	0.225389	0.10957	0.279085	0.214162
50	0.221104	0.112413	0.283646	0.235412
50.3311	0.219893	0.118634	0.281611	0.252834
50.6623	0.219006	0.123663	0.293748	0.24677
50.9934	0.220633	0.1206	0.289196	0.252598
51.3245	0.218993	0.128838	0.293254	0.257875
51.6556	0.213683	0.129082	0.291298	0.250976
51.9868	0.218071	0.137724	0.30038	0.260663
52.3179	0.218167	0.146098	0.308398	0.252125
52.649	0.217247	0.142481	0.324492	0.26383
52.9801	0.220692	0.145934	0.332175	0.264806
53.3113	0.226892	0.155518	0.328139	0.273234
53.6424	0.22275	0.159553	0.342153	0.26917
53.9735	0.227735	0.158131	0.342387	0.275723
54.3046	0.223407	0.161833	0.350931	0.297776
54.6358	0.225355	0.16142	0.354295	0.291743
54.9669	0.226026	0.164887	0.350909	0.271848
55.298	0.225253	0.165642	0.354282	0.290136
55.6291	0.220988	0.165084	0.365007	0.292767
55.9603	0.230662	0.166989	0.361987	0.287632
56.2914	0.233759	0.172928	0.371228	0.299556
56.6225	0.234373	0.178924	0.367033	0.291082
56.9536	0.233825	0.178178	0.369267	0.307386
57.2848	0.226627	0.17844	0.365086	0.31104
57.6159	0.236079	0.179486	0.378619	0.315923
57.947	0.239205	0.180875	0.380151	0.31731
58.2781	0.236454	0.178586	0.391618	0.310977
58.6093	0.237878	0.1767	0.381118	0.319704
58.9404	0.239726	0.165384	0.376544	0.314128
59.2715	0.239464	0.178042	0.381184	0.348531
59.6026	0.24123	0.176142	0.383065	0.362441
59.9338	0.244496	0.181114	0.386204	0.356313
60.2649	0.243364	0.19061	0.398205	0.366883
60.596	0.240171	0.186725	0.392479	0.361653
60.9272	0.242737	0.190746	0.402373	0.368632
61.2583	0.25738	0.193655	0.416171	0.353383
61.5894	0.259534	0.194738	0.417354	0.37624
61.9205	0.263161	0.200166	0.433037	0.369545
62.2517	0.268919	0.195616	0.427567	0.365087
62.5828	0.275345	0.218899	0.427311	0.369687
62.9139	0.278793	0.217341	0.427699	0.376209
63.245	0.28097	0.217121	0.431382	0.371026
63.5762	0.273828	0.22663	0.433408	0.381738
63.9073	0.276679	0.227212	0.436653	0.390732
64.2384	0.279606	0.220527	0.440433	0.391788
64.5695	0.280751	0.227625	0.446778	0.406454
64.9007	0.277678	0.231922	0.437095	0.405997
65.2318	0.285703	0.226724	0.433854	0.429074
65.5629	0.291359	0.22967	0.443493	0.429941
65.894	0.290555	0.228174	0.445418	0.429468
66.2252	0.282212	0.223332	0.450464	0.439313
66.5563	0.281996	0.228451	0.467432	0.439077
66.8874	0.284359	0.231195	0.457445	0.444969
67.2185	0.280887	0.230369	0.46394	0.450072
67.5497	0.280589	0.231359	0.465075	0.452719
67.8808	0.289175	0.241981	0.477826	0.490352
68.2119	0.293141	0.236998	0.471384	0.519793
68.543	0.293556	0.241451	0.473556	0.526835
68.8742	0.294017	0.237824	0.461114	0.496716
69.2053	0.284714	0.24306	0.470854	0.536255
69.5364	0.281445	0.245091	0.45986	0.566925
69.8675	0.289115	0.254906	0.456942	0.573226
70.1987	0.28181	0.261534	0.457101	0.608874
70.5298	0.278979	0.262796	0.446698	0.624879
70.8609	0.286095	0.26525	0.449197	0.624548
71.1921	0.284366	0.267056	0.450341	0.648019
71.5232	0.287748	0.275665	0.45069	0.652241
71.8543	0.294976	0.276706	0.445003	0.65495
72.1854	0.289052	0.271518	0.439082	0.677051
72.5166	0.292928	0.277579	0.429876	0.662386
72.8477	0.300104	0.284809	0.427302	0.674436
73.1788	0.300482	0.278832	0.423929	0.674909
73.5099	0.314876	0.280671	0.428092	0.699688
73.8411	0.322855	0.274417	0.420308	0.71103
74.1722	0.320243	0.282444	0.415111	0.70591
74.5033	0.325882	0.271593	0.418886	0.719016
74.8344	0.330551	0.27718	0.421721	0.722419
75.1656	0.33318	0.275093	0.406943	0.706036
75.4967	0.323452	0.278128	0.405115	0.723206
75.8278	0.326711	0.273906	0.414917	0.7124
76.1589	0.329659	0.276702	0.415125	0.715771
76.4901	0.327013	0.279986	0.41591	0.6969
76.8212	0.329815	0.283429	0.411433	0.703059
77.1523	0.336409	0.286906	0.404532	0.710856
77.4834	0.336134	0.290818	0.411981	0.693781
77.8146	0.3363	0.288946	0.414286	0.701814
78.1457	0.335367	0.29664	0.413186	0.702129
78.4768	0.337229	0.298484	0.423527	0.706902
78.8079	0.335374	0.296124	0.418502	0.727034
79.1391	0.32702	0.289007	0.411248	0.744488
79.4702	0.327777	0.296664	0.410515	0.778151
79.8013	0.320834	0.296077	0.417341	0.833333
80.1325	0.313154	0.296434	0.395565	0.837129
80.4636	0.316602	0.301791	0.402921	0.874258
80.7947	0.311126	0.3009	0.393812	0.913561
81.1258	0.30705	0.302298	0.400325	0.926698
81.457	0.303443	0.303204	0.397702	0.942089
81.7881	0.31175	0.307204	0.402903	0.971735
82.1192	0.309264	0.301857	0.403408	0.985408
82.4503	0.302673	0.30212	0.395425	0.991945
82.7815	0.304322	0.302867	0.397699	0.998262
83.1126	0.298886	0.301224	0.399278	1.00307
83.4437	0.29646	0.295716	0.401578	1.00308
83.7748	0.297319	0.29436	0.393898	1.0212
84.106	0.302434	0.288829	0.389712	1.03222
84.4371	0.303609	0.293084	0.394598	1.0514
84.7682	0.304684	0.292244	0.391575	1.05143
85.0993	0.299586	0.294553	0.392255	1.06841
85.4305	0.303602	0.287816	0.391891	1.10903
85.7616	0.296473	0.281825	0.388465	1.12179
86.0927	0.296898	0.282505	0.38512	1.16414
86.4238	0.296738	0.278231	0.384248	1.17256
86.755	0.298285	0.277391	0.377254	1.19996
87.0861	0.29171	0.275918	0.377325	1.19692
87.4172	0.286573	0.263373	0.382736	1.19908
87.7483	0.281923	0.265574	0.381391	1.17241
88.0795	0.27798	0.266076	0.377859	1.18474
88.4106	0.280927	0.260409	0.377363	1.17946
88.7417	0.283446	0.264748	0.374261	1.16081
89.0728	0.28018	0.258316	0.373228	1.14591
89.404	0.286659	0.271363	0.370543	1.14352
89.7351	0.282557	0.265907	0.373936	1.13865
90.0662	0.28036	0.257786	0.369583	1.12055
90.3974	0.278176	0.257692	0.364499	1.10316
90.7285	0.278402	0.263036	0.370545	1.07441
91.0596	0.282305	0.263181	0.364324	1.07833
91.3907	0.271186	0.254774	0.362492	1.06497
91.7219	0.276075	0.250223	0.359871	1.05308
92.053	0.271432	0.251378	0.360724	1.01513
92.3841	0.268674	0.251659	0.357012	1.01589
92.7152	0.262507	0.244097	0.355697	0.9929
93.0464	0.26339	0.245738	0.35756	0.99921
93.3775	0.260327	0.249811	0.356125	0.994098
93.7086	0.257642	0.242942	0.355361	0.993487
94.0397	0.253151	0.231463	0.353942	0.9898
94.3709	0.250795	0.235713	0.35022	0.97602
94.702	0.254303	0.238608	0.355253	0.963641
95.0331	0.254489	0.237378	0.350076	0.954877
95.3642	0.250991	0.240273	0.346241	0.949047
95.6954	0.242607	0.228066	0.342299	0.940703
96.0265	0.249474	0.228812	0.346606	0.944486
96.3576	0.252909	0.239189	0.342756	0.917465
96.6887	0.253311	0.237913	0.343784	0.926181
97.0199	0.247031	0.231444	0.340539	0.939194
97.351	0.24503	0.234409	0.340082	0.931724
97.6821	0.24199	0.234657	0.340762	0.951585
98.0132	0.242026	0.232176	0.337104	0.953776
98.3444	0.239793	0.227278	0.339078	0.950975
98.6755	0.233215	0.227254	0.333625	0.950568
99.0066	0.230344	0.217721	0.333834	0.946557
99.3377	0.227264	0.228662	0.337877	0.961115
99.6689	0.230812	0.232011	0.328779	0.955428
100	0.225492	0.227728	0.327598	0.941373
100.331	0.231708	0.219087	0.332364	0.940858
100.662	0.230958	0.220832	0.32594	0.953908
100.993	0.23127	0.212078	0.322057	0.94026
101.325	0.232992	0.209568	0.323258	0.94718
101.656	0.229049	0.219087	0.316509	0.947215
101.987	0.231525	0.21333	0.316699	0.940367
102.318	0.224363	0.210426	0.312601	0.925666
102.649	0.223085	0.209186	0.312575	0.927761
102.98	0.220165	0.20795	0.310716	0.92126
103.311	0.219753	0.208393	0.310107	0.920314
103.642	0.224406	0.206875	0.308559	0.925606
103.974	0.216388	0.203132	0.31027	0.908797
104.305	0.218807	0.207035	0.314317	0.909516
104.636	0.208824	0.205604	0.310882	0.897628
104.967	0.220825	0.203634	0.308599	0.916831
105.298	0.218353	0.202524	0.306729	0.914364
105.629	0.215057	0.198996	0.302462	0.896454
105.96	0.214579	0.204856	0.299351	0.878185
106.291	0.215953	0.200877	0.298126	0.867746
106.623	0.214118	0.199381	0.296309	0.860227
106.954	0.206999	0.205403	0.297029	0.860383
107.285	0.214815	0.200787	0.297015	0.853271
107.616	0.211675	0.20469	0.294324	0.839647
107.947	0.213756	0.198748	0.294636	0.854648
108.278	0.209684	0.195887	0.288598	0.856396
108.609	0.21501	0.198795	0.291854	0.85551
108.94	0.210785	0.199879	0.291317	0.845406
109.272	0.214048	0.197127	0.2876	0.836894
109.603	0.201569	0.199841	0.285684	0.842461
109.934	0.200221	0.198475	0.287684	0.831722
110.265	0.209315	0.197349	0.285867	0.824359
110.596	0.199315	0.193453	0.280615	0.822384
110.927	0.209534	0.202747	0.282611	0.829208
111.258	0.205595	0.198581	0.278586	0.820217
111.589	0.204848	0.202878	0.280621	0.805156
111.921	0.206006	0.199149	0.275398	0.795267
112.252	0.202053	0.19328	0.27287	0.800343
112.583	0.198482	0.197216	0.271559	0.798715
112.914	0.195605	0.196856	0.272603	0.788407
113.245	0.200268	0.196668	0.271232	0.785917
113.576	0.194088	0.196302	0.273564	0.791257
113.907	0.202037	0.194707	0.271749	0.809694
114.238	0.197158	0.194566	0.267775	0.801457
114.57	0.194603	0.194519	0.272764	0.804881
114.901	0.189146	0.193588	0.266393	0.80427
115.232	0.19363	0.19355	0.267857	0.794657
115.563	0.193627	0.19326	0.268208	0.798667
115.894	0.190172	0.193203	0.266738	0.788324
116.225	0.196813	0.192237	0.2633	0.778698
116.556	0.194297	0.19105	0.262826	0.774245
116.887	0.195741	0.190745	0.25841	0.781464
117.219	0.196202	0.190114	0.258565	0.785953
117.55	0.194227	0.189647	0.258099	0.791532
117.881	0.189355	0.189525	0.253353	0.801684
118.212	0.193391	0.18945	0.253518	0.79583
118.543	0.191838	0.188838	0.253432	0.791077
118.874	0.194055	0.188366	0.24763	0.790538
119.205	0.188605	0.1879	0.247138	0.789617
119.536	0.181115	0.187747	0.245173	0.800331
119.868	0.187483	0.187651	0.248586	0.793735
120.199	0.193149	0.187527	0.244644	0.804665
120.53	0.185701	0.187475	0.244286	0.780901
120.861	0.187198	0.187276	0.240692	0.774017
121.192	0.192482	0.187252	0.240442	0.772233
121.523	0.182678	0.186804	0.241144	0.768017
121.854	0.187938	0.18629	0.236237	0.779169
122.185	0.186182	0.185929	0.237937	0.766498
122.517	0.184045	0.185854	0.23229	0.75192
122.848	0.183776	0.185786	0.231274	0.755454
123.179	0.182243	0.184609	0.231572	0.739927
123.51	0.182114	0.184304	0.230535	0.746134
123.841	0.19067	0.184238	0.227967	0.750066
124.172	0.18214	0.184123	0.227601	0.745778
124.503	0.185549	0.18402	0.226744	0.743429
124.834	0.185273	0.183945	0.225552	0.749711
125.166	0.18676	0.183354	0.224441	0.745239
125.497	0.187978	0.183279	0.222514	0.749797
125.828	0.184387	0.183056	0.223349	0.75624
126.159	0.190039	0.182981	0.218132	0.758535
126.49	0.191002	0.182645	0.218081	0.74608
126.821	0.185997	0.182596	0.222059	0.743731
127.152	0.18211	0.182533	0.222753	0.750346
127.483	0.185406	0.182521	0.222885	0.743688
127.815	0.185851	0.182432	0.218295	0.735768
128.146	0.186398	0.182068	0.218693	0.731868
128.477	0.19068	0.181843	0.219042	0.740725
128.808	0.186163	0.181777	0.21709	0.741306
129.139	0.185333	0.181763	0.217671	0.729045
129.47	0.178373	0.181759	0.215381	0.729185
129.801	0.177477	0.181658	0.214527	0.738451
130.132	0.173454	0.181627	0.214538	0.746942
130.464	0.168725	0.181576	0.209937	0.737783
130.795	0.173697	0.181369	0.203705	0.750745
131.126	0.174606	0.181043	0.204087	0.753644
131.457	0.178569	0.181017	0.202383	0.735865
131.788	0.180043	0.181003	0.199352	0.744453
132.119	0.180454	0.180795	0.1968	0.743246
132.45	0.176949	0.180675	0.194852	0.741156
132.781	0.176106	0.180473	0.19674	0.740225
133.113	0.17606	0.180358	0.196782	0.739701
133.444	0.169933	0.18033	0.193674	0.73936
133.775	0.17527	0.180297	0.18966	0.738113
134.106	0.174221	0.180203	0.187463	0.737943
134.437	0.169525	0.179957	0.189698	0.737574
134.768	0.166999	0.179758	0.18932	0.735788
135.099	0.172339	0.179699	0.190645	0.735717
135.43	0.168848	0.179678	0.187044	0.734753
135.762	0.176226	0.179633	0.190393	0.734143
136.093	0.173149	0.179598	0.188901	0.731875
136.424	0.171802	0.179579	0.186567	0.731761
136.755	0.171915	0.179422	0.184412	0.731279
137.086	0.171523	0.179406	0.182752	0.731237
137.417	0.175575	0.179392	0.182991	0.721974
137.748	0.176893	0.179347	0.181242	0.721186
138.079	0.177875	0.178911	0.18147	0.721092
138.411	0.177859	0.178794	0.180108	0.720635
138.742	0.179511	0.178765	0.177317	0.720525
139.073	0.178446	0.178721	0.175765	0.719958
139.404	0.18067	0.178601	0.176182	0.719753
139.735	0.170288	0.178571	0.17556	0.719296
140.066	0.176183	0.178559	0.171866	0.718918
140.397	0.173395	0.178336	0.173039	0.718524
140.728	0.172834	0.17832	0.173915	0.71843
141.06	0.16521	0.178296	0.175222	0.718367
141.391	0.16758	0.17828	0.172244	0.718256
141.722	0.17225	0.178193	0.173063	0.716697
142.053	0.170029	0.178156	0.173059	0.71624
142.384	0.171629	0.177991	0.173109	0.715925
142.715	0.168828	0.17794	0.170952	0.715925
143.046	0.176534	0.17786	0.170454	0.71498
143.377	0.164258	0.177851	0.174505	0.714807
143.709	0.166707	0.17783	0.170705	0.71446
144.04	0.171486	0.177825	0.173235	0.714413
144.371	0.164805	0.177797	0.174772	0.71394
144.702	0.163992	0.177712	0.177368	0.713326
145.033	0.163319	0.177651	0.179264	0.712585
145.364	0.166518	0.177579	0.176767	0.711987
145.695	0.163587	0.177572	0.172246	0.711656
146.026	0.172353	0.177536	0.175635	0.711325
146.358	0.163461	0.177515	0.174641	0.710664
146.689	0.174799	0.17748	0.17654	0.710144
147.02	0.165562	0.177346	0.174917	0.70923
147.351	0.165702	0.177344	0.172054	0.70912
147.682	0.165071	0.177323	0.17431	0.708836
148.013	0.164172	0.177192	0.173761	0.708663
148.344	0.166243	0.177189	0.173961	0.708253
148.675	0.163873	0.177131	0.172584	0.70819
149.007	0.16461	0.1771	0.172917	0.707954
149.338	0.167633	0.176957	0.172527	0.707671
149.669	0.168307	0.176931	0.170175	0.707072
150	0.165675	0.17688	0.168283	0.707009
150.331	0.167736	0.176753	0.171098	0.706899
150.662	0.16747	0.176614	0.169696	0.706647
150.993	0.167709	0.176549	0.169228	0.706064
151.325	0.168762	0.176474	0.167645	0.704126
151.656	0.166588	0.176441	0.167566	0.704079
151.987	0.159326	0.176338	0.16967	0.704063
152.318	0.162953	0.176317	0.167972	0.703134
152.649	0.162841	0.17626	0.165619	0.702661
152.98	0.165071	0.176059	0.168211	0.701543
153.311	0.162731	0.175965	0.170621	0.701338
153.642	0.160803	0.175829	0.173074	0.701149
153.974	0.157049	0.175829	0.167367	0.701102
154.305	0.167929	0.175779	0.163157	0.70096
154.636	0.162804	0.175747	0.163802	0.700094
154.967	0.161417	0.175714	0.1617	0.700031
155.298	0.161643	0.175711	0.161404	0.699999
155.629	0.156412	0.175625	0.159237	0.699983
155.96	0.1553	0.175531	0.162592	0.699668
156.291	0.15993	0.17539	0.159214	0.699637
156.623	0.157033	0.175362	0.159678	0.699637
156.954	0.158911	0.175294	0.156799	0.698991
157.285	0.156707	0.175235	0.154212	0.698723
157.616	0.15836	0.175139	0.155062	0.69866
157.947	0.154799	0.174829	0.155241	0.698644
158.278	0.153219	0.174801	0.154506	0.698471
158.609	0.156273	0.174733	0.151055	0.697967
158.94	0.154006	0.174677	0.154751	0.697825
159.272	0.157066	0.174635	0.153265	0.697179
159.603	0.156807	0.174602	0.154664	0.697053
159.934	0.1623	0.174562	0.15547	0.697022
160.265	0.159485	0.174471	0.152346	0.696927
160.596	0.154666	0.174234	0.153152	0.696612
160.927	0.159625	0.174217	0.147631	0.696581
161.258	0.158735	0.174205	0.148892	0.696471
161.589	0.158841	0.174116	0.147384	0.696203
161.921	0.159017	0.173966	0.146549	0.695683
162.252	0.158865	0.173856	0.144141	0.695636
162.583	0.156193	0.173804	0.146108	0.695289
162.914	0.156203	0.17372	0.142313	0.695069
163.245	0.150843	0.173112	0.144448	0.694753
163.576	0.148098	0.173079	0.143997	0.694423
163.907	0.148593	0.173065	0.147721	0.694423
164.238	0.150401	0.172958	0.147922	0.694045
164.57	0.151115	0.172498	0.147185	0.693919
164.901	0.15216	0.172395	0.146456	0.693745
165.232	0.15313	0.17224	0.144882	0.693383
165.563	0.159615	0.172219	0.145158	0.693131
165.894	0.156276	0.17201	0.147931	0.692784
166.225	0.152177	0.171986	0.147805	0.692721
166.556	0.15829	0.171757	0.14392	0.692721
166.887	0.158284	0.171717	0.144461	0.692643
167.219	0.155961	0.171524	0.145523	0.692517
167.55	0.162489	0.171454	0.142441	0.692296
167.881	0.154972	0.171107	0.146587	0.691855
168.212	0.152306	0.170893	0.143843	0.691713
168.543	0.152884	0.170781	0.142096	0.691493
168.874	0.156671	0.170645	0.141876	0.691099
169.205	0.16377	0.170398	0.142178	0.690847
169.536	0.158636	0.169018	0.141439	0.6908
169.868	0.152655	0.168881	0.141339	0.690784
170.199	0.153349	0.168635	0.139193	0.690327
170.53	0.157932	0.16862	0.140023	0.690012
170.861	0.159047	0.168613	0.138502	0.689917
171.192	0.156266	0.168613	0.138805	0.689807
171.523	0.155778	0.168322	0.13778	0.689035
171.854	0.162625	0.168286	0.136895	0.688846
172.185	0.160863	0.168088	0.137246	0.688437
172.517	0.148656	0.1679	0.137491	0.688374
172.848	0.148639	0.167095	0.134835	0.688232
173.179	0.151988	0.16701	0.137586	0.688122
173.51	0.146668	0.166842	0.135888	0.688059
173.841	0.149386	0.166812	0.136392	0.687822
174.172	0.153295	0.166239	0.139436	0.687791
174.503	0.156296	0.165898	0.143699	0.687791
174.834	0.155957	0.165754	0.140083	0.687728
175.166	0.153548	0.165568	0.141156	0.687712
175.497	0.153442	0.165473	0.140149	0.68746
175.828	0.153192	0.165402	0.137646	0.687444
176.159	0.153735	0.164507	0.140783	0.687303
176.49	0.153643	0.16409	0.139763	0.687208
176.821	0.153551	0.163846	0.141781	0.68642
177.152	0.153453	0.163563	0.138054	0.686247
177.483	0.153499	0.16286	0.14037	0.686184
177.815	0.153264	0.162719	0.138032	0.685885
178.146	0.153158	0.162533	0.137341	0.685759
178.477	0.153	0.16248	0.137637	0.685302
178.808	0.152753	0.162404	0.1385	0.685097
179.139	0.152645	0.162094	0.136368	0.684593
179.47	0.152602	0.161243	0.136765	0.684451
179.801	0.152491	0.161187	0.138275	0.683742
180.132	0.152341	0.160455	0.140171	0.683538
180.464	0.15215	0.159887	0.134465	0.68316
180.795	0.152269	0.159835	0.13484	0.683128
181.126	0.152037	0.159613	0.135021	0.682451
181.457	0.151833	0.159408	0.13357	0.682372
181.788	0.151708	0.159294	0.136895	0.682277
182.119	0.151639	0.159062	0.137591	0.682167
182.45	0.151293	0.158845	0.134599	0.682025
182.781	0.151224	0.158667	0.130478	0.681821
183.113	0.151242	0.158594	0.132696	0.681537
183.444	0.151003	0.158569	0.133928	0.681443
183.775	0.150986	0.158391	0.13169	0.681411
184.106	0.150943	0.158211	0.13378	0.681364
184.437	0.15104	0.158052	0.129263	0.681096
184.768	0.150799	0.157923	0.129054	0.681064
185.099	0.150666	0.157769	0.130065	0.680797
185.43	0.150346	0.157735	0.127239	0.680434
185.762	0.150391	0.15762	0.127687	0.680387
186.093	0.15011	0.157423	0.125835	0.680041
186.424	0.149769	0.157245	0.129345	0.679804
186.755	0.149639	0.157103	0.125292	0.679694
187.086	0.149607	0.157101	0.128652	0.679521
187.417	0.149407	0.156808	0.121545	0.679064
187.748	0.149521	0.156652	0.122358	0.679048
188.079	0.149431	0.156449	0.121969	0.67845
188.411	0.149342	0.156208	0.12257	0.678418
188.742	0.149033	0.156159	0.12153	0.678387
189.073	0.148738	0.155359	0.122757	0.678072
189.404	0.148658	0.155025	0.125022	0.677709
189.735	0.148386	0.154795	0.122133	0.677678
190.066	0.148215	0.154642	0.124343	0.677063
190.397	0.147943	0.154488	0.121616	0.677032
190.728	0.147887	0.154478	0.12325	0.676575
191.06	0.147623	0.154261	0.123221	0.676244
191.391	0.147701	0.153949	0.122501	0.676181
191.722	0.147546	0.153941	0.121757	0.675819
192.053	0.147567	0.153717	0.119974	0.675441
192.384	0.147553	0.153644	0.116463	0.675331
192.715	0.147505	0.153617	0.115532	0.675315
193.046	0.147383	0.153466	0.118366	0.674968
193.377	0.147507	0.153239	0.121027	0.674889
193.709	0.147393	0.153229	0.119649	0.674212
194.04	0.147519	0.153197	0.119722	0.673645
194.371	0.147264	0.152922	0.119872	0.673188
194.702	0.146863	0.152922	0.121298	0.672322
195.033	0.146545	0.152775	0.122177	0.671912
195.364	0.146528	0.152563	0.123003	0.671566
195.695	0.146661	0.152544	0.118181	0.671408
196.026	0.146597	0.152487	0.121512	0.670983
196.358	0.146601	0.15248	0.123621	0.670542
196.689	0.14645	0.15238	0.121475	0.670526
197.02	0.146161	0.152341	0.120071	0.670195
197.351	0.146285	0.152312	0.118119	0.670038
197.682	0.146268	0.152243	0.118298	0.669943
198.013	0.146138	0.152234	0.118656	0.669439
198.344	0.146232	0.152226	0.116826	0.668998
198.675	0.146013	0.152161	0.119589	0.668777
199.007	0.145859	0.152065	0.119969	0.66862
199.338	0.145656	0.151982	0.119835	0.668494
199.669	0.14516	0.15197	0.120247	0.668478
200	0.144996	0.151865	0.119941	0.667454
200.331	0.144919	0.151836	0.120609	0.667281
200.662	0.145113	0.151831	0.118846	0.666304
200.993	0.145153	0.151758	0.121466	0.666068
201.325	0.145024	0.15167	0.119576	0.666068
201.656	0.144866	0.151482	0.11906	0.665721
201.987	0.144395	0.151399	0.120462	0.664461
202.318	0.144299	0.151131	0.118382	0.663941
202.649	0.144563	0.151019	0.118647	0.663815
202.98	0.144544	0.150938	0.118051	0.663579
203.311	0.144383	0.150899	0.117296	0.662965
203.642	0.144286	0.150892	0.115229	0.662602
203.974	0.144322	0.150877	0.117203	0.662571
204.305	0.144268	0.15076	0.11592	0.662571
204.636	0.144223	0.150589	0.114697	0.662382
204.967	0.144118	0.150587	0.113744	0.662004
205.298	0.144008	0.150553	0.11426	0.661374
205.629	0.14405	0.150519	0.118797	0.661342
205.96	0.143968	0.150228	0.118141	0.661137
206.291	0.143809	0.150204	0.116759	0.660948
206.623	0.143814	0.149982	0.119832	0.659279
206.954	0.143609	0.14975	0.116366	0.659011
207.285	0.143219	0.149658	0.117969	0.657609
207.616	0.143057	0.149631	0.118342	0.656254
207.947	0.143022	0.149621	0.119459	0.656065
208.278	0.14262	0.149619	0.116117	0.655876
208.609	0.142761	0.149609	0.11838	0.655372
208.94	0.142676	0.149314	0.118302	0.654868
209.272	0.142542	0.149297	0.118049	0.6546
209.603	0.142616	0.149199	0.118768	0.654395
209.934	0.142267	0.149157	0.116309	0.654317
210.265	0.142233	0.149075	0.117543	0.652789
210.596	0.142208	0.148945	0.117638	0.652174
210.927	0.141762	0.148933	0.115671	0.652158
211.258	0.14132	0.148833	0.117967	0.651828
211.589	0.141232	0.148799	0.119148	0.651103
211.921	0.140886	0.148755	0.117397	0.650394
212.252	0.141082	0.148726	0.117494	0.649922
212.583	0.140794	0.148518	0.11781	0.648677
212.914	0.140735	0.14847	0.116207	0.64863
213.245	0.140238	0.14843	0.11981	0.647448
213.576	0.139715	0.148389	0.116143	0.646897
213.907	0.139619	0.148362	0.118327	0.645023
214.238	0.139608	0.148321	0.117951	0.641576
214.57	0.139297	0.148291	0.117572	0.641302
214.901	0.139558	0.148174	0.119276	0.641258
215.232	0.139464	0.148157	0.116759	0.640526
215.563	0.139158	0.147835	0.118671	0.640429
215.894	0.138867	0.14776	0.115232	0.639714
216.225	0.138918	0.147677	0.118899	0.639512
216.556	0.138694	0.147638	0.117569	0.63937
216.887	0.138359	0.147513	0.116263	0.638947
217.219	0.138181	0.147238	0.113931	0.638312
217.55	0.137943	0.147001	0.112576	0.638118
217.881	0.137804	0.146728	0.115808	0.638074
218.212	0.137626	0.146669	0.117051	0.638065
218.543	0.137539	0.146667	0.116413	0.638003
218.874	0.137326	0.146608	0.114095	0.637368
219.205	0.137271	0.146567	0.11553	0.63593
219.536	0.137159	0.146108	0.113995	0.635921
219.868	0.137125	0.145974	0.114395	0.635533
220.199	0.13686	0.14594	0.116062	0.635286
220.53	0.136556	0.145791	0.11696	0.635189
220.861	0.136228	0.145684	0.117278	0.634686
221.192	0.135753	0.14564	0.114468	0.634651
221.523	0.135996	0.14546	0.113594	0.634033
221.854	0.135958	0.145808	0.113633	0.633469
222.185	0.13575	0.1463	0.116848	0.633337
222.517	0.135361	0.146788	0.114439	0.632701
222.848	0.135338	0.145504	0.113355	0.632296
223.179	0.135753	0.14576	0.114958	0.634408
223.51	0.135077	0.147661	0.116035	0.634119
223.841	0.13469	0.146893	0.110726	0.633372
224.172	0.134715	0.146283	0.111649	0.633217
224.503	0.13449	0.146961	0.113333	0.63265
224.834	0.134362	0.146177	0.114156	0.632618
225.166	0.134033	0.146314	0.113938	0.632483
225.497	0.133524	0.146806	0.113006	0.632219
225.828	0.13281	0.14608	0.106843	0.6322
226.159	0.133267	0.146642	0.112457	0.632187
226.49	0.132578	0.146576	0.110101	0.632155
226.821	0.132888	0.146627	0.111196	0.631845
227.152	0.132693	0.146791	0.112446	0.631684
227.483	0.132502	0.146836	0.111042	0.631292
227.815	0.132826	0.146718	0.112461	0.631143
228.146	0.132454	0.146536	0.111174	0.630699
228.477	0.132267	0.146234	0.11206	0.630454
228.808	0.132211	0.146827	0.112125	0.629688
229.139	0.131986	0.146614	0.114815	0.629237
229.47	0.131439	0.146104	0.112388	0.628696
229.801	0.131069	0.14541	0.110616	0.627351
230.132	0.130826	0.145314	0.108911	0.627331
230.464	0.13089	0.145212	0.109337	0.627273
230.795	0.13077	0.145194	0.114487	0.62719
231.126	0.130132	0.145136	0.118587	0.626262
231.457	0.129783	0.144644	0.10609	0.626095
231.788	0.129505	0.144636	0.110551	0.626075
232.119	0.129542	0.144578	0.111928	0.626005
232.45	0.129197	0.144158	0.10773	0.625953
232.781	0.128994	0.144002	0.111141	0.625824
233.113	0.128886	0.143812	0.116192	0.625593
233.444	0.128265	0.143622	0.110354	0.625303
233.775	0.128066	0.143526	0.113962	0.625148
234.106	0.127544	0.143318	0.11511	0.624871
234.437	0.127909	0.146141	0.118948	0.624685
234.768	0.127575	0.146075	0.113765	0.623191
235.099	0.12726	0.146026	0.107697	0.623184
235.43	0.127245	0.146003	0.111633	0.622128
235.762	0.126733	0.145741	0.110912	0.621986
236.093	0.12682	0.142603	0.110616	0.621471
236.424	0.12651	0.142495	0.110518	0.621136
236.755	0.125659	0.142441	0.110288	0.620846
237.086	0.125583	0.142379	0.109206	0.620692
237.417	0.12534	0.142348	0.109173	0.620686
237.748	0.125938	0.142067	0.109009	0.619758
238.079	0.125674	0.142056	0.109009	0.619578
238.411	0.126058	0.144985	0.108976	0.619011
238.742	0.125273	0.144898	0.108583	0.618844
239.073	0.124972	0.144801	0.116324	0.618541
239.404	0.124433	0.144658	0.113962	0.618245
239.735	0.124392	0.143229	0.113831	0.61753
240.066	0.124812	0.143092	0.108025	0.617318
240.397	0.124815	0.142716	0.107828	0.617182
240.728	0.124644	0.142642	0.107271	0.616197
241.06	0.124535	0.141005	0.10632	0.615508
241.391	0.123826	0.14073	0.106188	0.61507
241.722	0.123496	0.140641	0.106156	0.614916
242.053	0.123532	0.14057	0.112617	0.613473
242.384	0.123164	0.14057	0.112486	0.613196
242.715	0.123709	0.140409	0.108484	0.612829
243.046	0.123559	0.140021	0.108419	0.61234
243.377	0.123424	0.140016	0.108156	0.611
243.709	0.123216	0.140006	0.103827	0.610247
244.04	0.123159	0.13993	0.103728	0.609423
244.371	0.12288	0.139908	0.10363	0.609159
244.702	0.122779	0.141974	0.103302	0.608991
245.033	0.122751	0.141919	0.103138	0.608431
245.364	0.122303	0.141628	0.103007	0.608424
245.695	0.122113	0.141603	0.102974	0.608115
246.026	0.122349	0.141602	0.102843	0.607813
246.358	0.122397	0.141387	0.106024	0.60769
246.689	0.121973	0.141083	0.105696	0.60731
247.02	0.122249	0.141012	0.105532	0.606248
247.351	0.122249	0.140383	0.105073	0.606164
247.682	0.121868	0.140121	0.105073	0.605443
248.013	0.121844	0.139787	0.102613	0.604857
248.344	0.12188	0.139734	0.102416	0.604786
248.675	0.121472	0.139673	0.102351	0.602848
249.007	0.120785	0.139601	0.102285	0.600517
249.338	0.120776	0.139537	0.102121	0.600426
249.669	0.120656	0.139869	0.102121	0.6084
250	0.120895	0.139295	0.102056	0.609042
250.331	0.120543	0.139286	0.104909	0.609558
250.662	0.120802	0.139178	0.104647	0.608223
250.993	0.120652	0.139163	0.10386	0.607613
251.325	0.120514	0.139067	0.10386	0.608373
251.656	0.120183	0.138999	0.100678	0.608705
251.987	0.120475	0.13892	0.100087	0.608232
252.318	0.12011	0.138903	0.0999235	0.60866
252.649	0.120502	0.138787	0.0998907	0.60823
252.98	0.119983	0.139425	0.0997923	0.608688
253.311	0.119162	0.139314	0.0984475	0.607777
253.642	0.118687	0.138743	0.0983819	0.60754
253.974	0.118747	0.138638	0.0983819	0.607977
254.305	0.118774	0.138496	0.0982507	0.607803
254.636	0.118559	0.138469	0.0981523	0.607659
254.967	0.118858	0.138335	0.0976603	0.608771
255.298	0.118763	0.138332	0.0974635	0.608123
255.629	0.119105	0.138271	0.0974635	0.608281
255.96	0.11889	0.138168	0.0972667	0.607658
256.291	0.118306	0.13814	0.101498	0.607557
256.623	0.118318	0.138075	0.101203	0.607374
256.954	0.117983	0.137961	0.101006	0.607644
257.285	0.117887	0.137891	0.100973	0.608089
257.616	0.117435	0.138433	0.100776	0.607034
257.947	0.117231	0.138362	0.100776	0.607202
258.278	0.117278	0.138358	0.0992019	0.606966
258.609	0.117305	0.137158	0.0992019	0.606992
258.94	0.117362	0.137147	0.0990051	0.60706
259.272	0.116938	0.137124	0.0988411	0.606458
259.603	0.11666	0.137071	0.0963483	0.605835
259.934	0.116778	0.136998	0.0963155	0.605249
260.265	0.116765	0.136985	0.0963155	0.60528
260.596	0.116138	0.136929	0.0959875	0.605541
260.927	0.116279	0.136928	0.0971027	0.604873
261.258	0.115955	0.136878	0.0969387	0.604582
261.589	0.115415	0.136778	0.0966763	0.604726
261.921	0.115501	0.137847	0.0966107	0.604604
262.252	0.115671	0.137795	0.0966107	0.604577
262.583	0.115606	0.137747	0.0946427	0.604596
262.914	0.115872	0.13774	0.0946427	0.604016
263.245	0.115912	0.137734	0.0945771	0.604331
263.576	0.115891	0.1377	0.0945115	0.60381
263.907	0.115266	0.137591	0.0943146	0.603105
264.238	0.115273	0.137528	0.0942163	0.60277
264.57	0.115185	0.137513	0.0941179	0.602409
264.901	0.114775	0.137447	0.0959219	0.602549
265.232	0.114669	0.137339	0.0955939	0.603509
265.563	0.114045	0.137318	0.0953643	0.603474
265.894	0.114336	0.136693	0.0953315	0.603786
266.225	0.11439	0.136674	0.0952987	0.602912
266.556	0.114365	0.136672	0.0952331	0.60265
266.887	0.114121	0.136493	0.0947411	0.601964
267.219	0.113964	0.136479	0.0947411	0.601642
267.55	0.114015	0.136273	0.0947411	0.601388
267.881	0.114108	0.136246	0.0941179	0.60152
268.212	0.113557	0.13508	0.0940851	0.601169
268.543	0.11372	0.13506	0.0938226	0.600611
268.874	0.114109	0.135019	0.0937898	0.60099
269.205	0.114574	0.134909	0.0936586	0.600838
269.536	0.114842	0.134868	0.093593	0.600879
269.868	0.112938	0.134847	0.0920186	0.600245
270.199	0.113054	0.134827	0.0919858	0.600023
270.53	0.112991	0.13473	0.0918546	0.600508
270.861	0.112774	0.13464	0.0914938	0.600545
271.192	0.113046	0.134619	0.0914282	0.600789
271.523	0.112876	0.134614	0.0913298	0.600724
271.854	0.112374	0.135876	0.0910018	0.600276
272.185	0.11285	0.135872	0.092773	0.599741
272.517	0.112646	0.135696	0.0927074	0.598767
272.848	0.112209	0.135594	0.0923794	0.59941
273.179	0.113017	0.135533	0.090969	0.600022
273.51	0.112147	0.135428	0.0909034	0.599736
273.841	0.111358	0.135381	0.090641	0.59934
274.172	0.110837	0.135339	0.090477	0.599759
274.503	0.111421	0.135231	0.0904114	0.598624
274.834	0.111647	0.135152	0.0922482	0.598832
275.166	0.111826	0.135109	0.092117	0.599028
275.497	0.111814	0.134604	0.0897554	0.59898
275.828	0.111153	0.134563	0.089329	0.598671
276.159	0.110201	0.134517	0.0890994	0.598494
276.49	0.11029	0.134287	0.0888042	0.597761
276.821	0.110276	0.134247	0.0888042	0.597816
277.152	0.110063	0.134181	0.088345	0.596393
277.483	0.11037	0.134126	0.088345	0.596571
277.815	0.110238	0.133987	0.0882794	0.595971
278.146	0.110046	0.133974	0.088017	0.596922
278.477	0.109807	0.133116	0.0879514	0.597238
278.808	0.109979	0.133016	0.087689	0.596819
279.139	0.110132	0.132984	0.087689	0.596609
279.47	0.109864	0.132798	0.0881154	0.595161
279.801	0.10981	0.132669	0.0881154	0.595057
280.132	0.109095	0.132619	0.0880498	0.595523
280.464	0.108897	0.132524	0.0871314	0.595406
280.795	0.109201	0.132516	0.0870002	0.595888
281.126	0.109109	0.132505	0.0869674	0.595584
281.457	0.108754	0.132483	0.088673	0.595399
281.788	0.10916	0.13237	0.0885746	0.596073
282.119	0.109113	0.132155	0.0865082	0.59571
282.45	0.10889	0.133928	0.0863442	0.59495
282.781	0.10854	0.133888	0.0863442	0.594932
283.113	0.108745	0.133888	0.085721	0.594324
283.444	0.108203	0.133678	0.0874922	0.594071
283.775	0.107299	0.133638	0.0872626	0.59464
284.106	0.107584	0.133593	0.0853274	0.594976
284.437	0.107566	0.133379	0.0852946	0.594856
284.768	0.107601	0.133356	0.0852618	0.593029
285.099	0.107144	0.1333	0.084901	0.592816
285.43	0.107427	0.133261	0.0869346	0.592366
285.762	0.108073	0.13313	0.0869346	0.591976
286.093	0.107403	0.131631	0.0867706	0.592928
286.424	0.107144	0.131599	0.0847698	0.591899
286.755	0.107503	0.131407	0.0847042	0.591907
287.086	0.106728	0.131379	0.0846386	0.59186
287.417	0.106589	0.131317	0.084245	0.591877
287.748	0.106514	0.13125	0.0841794	0.591349
288.079	0.105589	0.131088	0.0836218	0.592116
288.411	0.104833	0.131084	0.0854258	0.590546
288.742	0.105116	0.130989	0.085393	0.589944
289.073	0.10513	0.131985	0.0829002	0.588866
289.404	0.104949	0.131915	0.0827034	0.588784
289.735	0.105077	0.131775	0.0826378	0.589624
290.066	0.104899	0.131767	0.0825394	0.589629
290.397	0.105437	0.131764	0.0834906	0.589288
290.728	0.104972	0.131702	0.0834578	0.58907
291.06	0.104576	0.13086	0.0829658	0.587652
291.391	0.104816	0.130842	0.082933	0.586993
291.722	0.104208	0.130775	0.0820474	0.587063
292.053	0.103689	0.130655	0.0817522	0.586328
292.384	0.103104	0.130557	0.081621	0.587419
292.715	0.103195	0.130355	0.0813586	0.587119
293.046	0.102617	0.13035	0.0805386	0.586849
293.377	0.103101	0.129473	0.0805058	0.586432
293.709	0.102747	0.129421	0.0824738	0.586317
294.04	0.102517	0.129399	0.0823098	0.58576
294.371	0.102143	0.128966	0.0822114	0.585558
294.702	0.101628	0.12883	0.0798825	0.585502
295.033	0.101701	0.128709	0.0797841	0.584606
295.364	0.101127	0.130123	0.0794889	0.584227
295.695	0.101671	0.130057	0.0789313	0.584699
296.026	0.100689	0.130005	0.0788329	0.584793
296.358	0.100024	0.129878	0.0780457	0.583946
296.689	0.0999335	0.129819	0.0777833	0.584498
297.02	0.0997858	0.129816	0.0802434	0.584498
297.351	0.0999147	0.129766	0.0791609	0.583735
297.682	0.10021	0.129579	0.0758481	0.583688
298.013	0.100348	0.128387	0.0756185	0.583759
298.344	0.0994907	0.128312	0.0749297	0.582944
298.675	0.0995663	0.127965	0.0746345	0.581569
299.007	0.099086	0.127319	0.0773897	0.581551
299.338	0.0981359	0.127194	0.0772913	0.581312
299.669	0.0982556	0.127336	0.0771929	0.58179
300	0.0979598	0.127332	0.0763688	0.581819
900.331	-0.0014254	-0.0120612	0.00150368	-0.0380308
900.662	-0.0008068	-0.016993	0.00969467	-0.0388562
900.993	0.00060765	-0.0187287	0.00425394	-0.0350318
901.325	-0.0011223	-0.0167004	0.00141399	-0.0258021
901.656	0.00048535	-0.0092158	-0.0081222	-0.0377402
901.987	-0.000151	-0.0143098	0.00183251	-0.0306959
902.318	0.00049244	-0.0128262	0.00024812	-0.0364499
902.649	-0.0011099	-0.010172	0.00715367	-0.0329859
902.98	-0.0002254	-0.0086015	0.00066664	-0.0281037
903.311	-0.0017037	-0.0162483	0.0044632	-0.0288593
903.642	0.00010071	-0.0119309	0.00024812	-0.0292894
903.974	-0.0004275	-0.005104	-0.0027114	-0.021164
904.305	0.00075477	-0.006208	0.00861848	-0.0160144
904.636	-7.832e-05	-0.0037045	-0.0035484	-0.0151193
904.967	0.00132198	-0.0044347	0.00275923	-0.0170374
905.298	-0.0002751	-0.0051098	0.00132431	-0.0156889
905.629	-0.0002272	-0.0058545	0.00072643	-0.0109811
905.96	-0.0017569	-0.0057995	-0.0008281	-0.0125155
906.291	0.00016098	-0.0106501	0.00368595	-0.0127712
906.623	0.00079022	-0.0056575	0.00132431	-0.0099698
906.954	-2.869e-05	-0.0085841	-0.0055513	-0.0087841
907.285	-0.000424	-0.0078452	-0.0048339	-0.0149566
907.616	-0.0020121	-0.0057473	0.00222114	-0.0070405
907.947	-0.0017179	-0.0037682	-0.0054916	-0.0018444
908.278	-0.0018402	0.00222408	-5.082e-05	-0.0185136
908.609	-0.0022266	-0.0035422	-0.0029804	-0.0106672
908.94	-0.0002272	-0.0061182	0.00536002	-0.0116669
909.272	4.5761e-05	-0.0029917	-0.002532	-0.0079936
909.603	0.00057752	-0.0007924	0.00213145	0.00024799
909.934	-0.0018686	0.0023139	-0.0061791	-0.0025186
910.265	0.00027619	0.00239793	-0.0038175	-0.0063546
910.596	0.00061651	-0.001311	-0.0037278	-0.002135
910.927	0.00112523	0.00400033	-0.0015156	0.00824551
911.258	0.0007725	7.983e-05	-0.0001704	0.00204975
911.589	-0.0008742	0.00734999	-0.0028609	0.00409563
911.921	0.00155595	0.00291371	-0.0009178	0.00603689
912.252	0.0010047	0.00393078	-0.0008281	0.0168824
912.583	0.00132375	0.00772958	-0.0029804	0.0152085
912.914	0.00200263	0.0102157	0.00434362	0.0189747
913.245	0.00408712	0.0151852	0.00252008	0.0157083
913.576	0.00202745	0.0115226	0.00553939	0.0209857
913.907	0.0024759	0.0134785	0.0018923	0.00957068
914.238	0.00106851	0.00760788	0.00108516	0.0235315
914.57	-0.0014768	0.00296008	-0.0019043	0.0115933
914.901	-0.0035649	0.00188795	0.00440341	0.0198582
915.232	2.2718e-05	0.00887414	0.00132431	0.0135811
915.563	0.00015566	0.00891761	-0.0024125	0.0150225
915.894	0.0013078	0.0102215	0.011877	0.0231362
916.225	-0.0018934	0.0123948	0.00329732	0.025868
916.556	0.00055625	0.00804542	0.00452298	0.0234966
916.887	0.00106496	0.0120673	-0.0030701	0.0232873
917.219	0.00196186	0.0142174	-0.0036381	0.0247171
917.55	0.00100824	0.0135567	-2.093e-05	0.0301922
917.881	-3.223e-05	0.0125599	-0.0011569	0.0295064
918.212	-0.0006189	0.00266741	0.00165315	0.0260656
918.543	0.00038786	0.00508114	-0.0027114	0.0280766
918.874	-0.0011507	0.00297746	-0.0089294	0.0334586
919.205	-0.0004718	0.00519415	-0.006508	0.0381083
919.536	0.00036482	0.0121601	-0.0079728	0.0409795
919.868	-0.0007661	0.0162776	-0.0041164	0.037097
920.199	0.00031696	0.0109517	-0.008481	0.0364228
920.53	0.00073882	0.0126324	-0.0049535	0.0498489
920.861	0.00130071	0.0153677	-0.0066873	0.0370273
921.192	-0.0006118	0.0153619	0.00045738	0.0450713
921.523	-0.0016683	0.0137393	-0.0047741	0.0471869
921.854	-0.0009646	0.0194563	-0.0043855	0.049256
922.185	0.00112878	0.0145796	0.00150368	0.0526155
922.517	0.00125817	0.0197171	0.00027802	0.0415259
922.848	0.00203099	0.0169469	-0.0029804	0.0514298
923.179	0.0031211	0.0232725	-0.0069265	0.0465825
923.51	0.00075123	0.0202502	0.000846	0.0550333
923.841	0.00325404	0.0166804	0.00213145	0.058881
924.172	0.00130957	0.0178829	0.00171293	0.0597644
924.503	0.00209658	0.0123948	-0.0050132	0.0547776
924.834	0.00361563	0.0184073	-0.0044453	0.0622869
925.166	0.00259288	0.0155764	-0.0049236	0.0621823
925.497	0.00208948	0.0176656	-0.0107828	0.064914
925.828	0.00157191	0.0248111	-0.00029	0.0643095
926.159	0.00107383	0.0191318	-0.0146392	0.0682734
926.49	0.001914	0.0192071	-0.0006188	0.070296
926.821	0.00156659	0.0174135	-0.008481	0.0659369
927.152	0.00023365	0.0132177	-0.0118291	0.073516
927.483	0.0034951	0.0184508	-0.0069265	0.0711097
927.815	0.00398609	0.0223887	-0.0097066	0.0730626
928.146	0.00370071	0.0220439	-0.0062688	0.083478
928.477	0.0020434	0.0241447	-0.0119188	0.077259
928.808	0.00258757	0.0242258	-0.0062987	0.0832688
929.139	0.00120854	0.0226756	-0.0028609	0.0886043
929.47	0.0005527	0.0232348	-0.0025619	0.0841406
929.801	0.00332494	0.0219772	-0.0024125	0.0921497
930.132	0.00316541	0.0289228	-0.0046246	0.0933354
930.464	0.00351282	0.0219019	-0.0053421	0.0948814
930.795	0.0007849	0.0241649	-0.0145196	0.0938817
931.126	0.00520913	0.028352	-0.0089892	0.0959974
931.457	0.00294916	0.0317422	-0.0060894	0.0937771
931.788	0.00440263	0.0309831	-0.0066275	0.102995
932.119	0.00683986	0.0306701	-0.0037876	0.110214
932.45	0.00378757	0.0321334	-0.0117992	0.0969854
932.781	0.00509215	0.028042	-0.0064482	0.106738
933.113	0.00410485	0.0287867	-0.0101251	0.10389
933.444	0.00254148	0.0247937	-0.0080027	0.101298
933.775	0.00365108	0.0237158	-0.0102746	0.106575
934.106	0.0005013	0.0198011	-0.0113807	0.0937888
934.437	0.00120322	0.0206298	-0.0098561	0.0997985
934.768	0.00506379	0.0278333	-0.0032196	0.11362
935.099	0.00563099	0.0248285	-0.0151474	0.110074
935.43	0.00196186	0.0246575	-0.0065379	0.106227
935.762	0.00182715	0.0239795	-0.0082418	0.109633
936.093	0.0055406	0.028352	-0.0038773	0.110563
936.424	0.00411017	0.0312207	-0.0074646	0.12328
936.755	0.00303956	0.0269728	-0.0057307	0.102937
937.086	0.00594828	0.0270307	-0.0125167	0.110714
937.417	0.00497339	0.027361	-0.0115302	0.119781
937.748	0.00642686	0.0298153	-0.0149979	0.114445
938.079	0.00255034	0.0257992	-0.0144897	0.112504
938.411	0.00345079	0.0251414	-0.0010672	0.117316
938.742	0.00144606	0.0232609	-0.0108725	0.119606
939.073	0.00446113	0.0231073	-0.0060894	0.107052
939.404	0.00189628	0.0215455	-0.0149979	0.112539
939.735	0.00245817	0.0256746	-0.0108426	0.124035
940.066	0.0031211	0.0242345	-0.012427	0.122989
940.397	0.00310337	0.0244866	-0.0148783	0.116712
940.728	0.00144251	0.0207168	-0.0103643	0.111028
941.06	0.00018047	0.0223597	-0.012427	0.114445
941.391	0.00021415	0.0168281	-0.0148185	0.123094
941.722	-0.0002201	0.021418	-0.0141011	0.107924
942.053	0.00308033	0.0228929	-0.0078831	0.119769
942.384	0.00170662	0.0201488	-0.0073151	0.11949
942.715	-0.0004789	0.02156	-0.013264	0.119002
943.046	4.3988e-05	0.0236463	-0.0117992	0.113876
943.377	0.0004109	0.0222409	-0.0181368	0.123675
943.709	0.00278786	0.0223481	-0.0123672	0.118688
944.04	0.00027973	0.0189405	-0.0201995	0.114585
944.371	-0.0001758	0.0218932	-0.0175688	0.127918
944.702	0.00106142	0.0185088	-0.0133537	0.110179
945.033	-0.0004098	0.0190361	-0.0091087	0.135613
945.364	0.00061474	0.0201749	-0.0164926	0.121385
945.695	-0.0011259	0.0188999	-0.0184058	0.125267
946.026	-0.001133	0.00932065	-0.0135032	0.116898
946.358	5.8168e-05	0.00826924	-0.018645	0.119362
946.689	-0.0004895	0.011136	-0.0156257	0.113352
947.02	-0.0009947	0.00932065	-0.0186749	0.116038
947.351	-0.0017427	0.00985645	-0.019213	0.107947
947.682	-0.0018349	0.010334	-0.0162534	0.119048
948.013	1.9173e-05	0.00933847	-0.0149979	0.119176
948.344	0.00206644	0.0118119	-0.0172699	0.124988
948.675	-0.0023401	0.0103447	-0.0171204	0.127336
949.007	-0.0006544	0.0100358	-0.0192728	0.121385
949.338	-3.755e-05	0.0102224	-0.0230992	0.121966
949.669	-0.0019767	0.00815757	-0.0125466	0.128464
950	-0.0004346	0.00987546	-0.0170606	0.12235
950.331	-0.0030562	0.00937054	-0.0181069	0.135764
950.662	-0.0005285	0.0115743	-0.0172997	0.135253
950.993	0.00151519	0.0100952	-0.01724	0.12994
951.325	0.00056511	0.0105301	-0.0147886	0.125325
951.656	-0.0014503	0.0102449	-0.0170008	0.118723
951.987	-0.0009327	0.0102639	-0.0186151	0.131882
952.318	-0.0010497	0.012697	-0.0201696	0.12364
952.649	0.00071223	0.0102936	-0.019781	0.130138
952.98	0.00104724	0.012583	-0.0150876	0.136334
953.311	-0.0014946	0.00899394	-0.0113508	0.133242
953.642	0.00065197	0.0116908	-0.0227405	0.132951
953.974	-0.000798	0.0102295	-0.0186749	0.137984
954.305	-0.0002361	0.0127101	-0.0174193	0.127906
954.636	-0.0014875	0.010675	-0.0212458	0.139716
954.967	-0.0011401	0.00978041	-0.0181368	0.128627
955.298	-0.0004169	0.0074103	-0.0135331	0.117874
955.629	-0.0008015	0.00741742	-0.0188542	0.120106
955.96	-0.0026733	0.00809579	-0.0155659	0.123872
956.291	-0.0027637	0.0115684	-0.0145196	0.131021
956.623	-0.0007022	0.00974477	-0.011022	0.127697
956.954	-0.0022532	0.00912581	-0.0157452	0.129824
957.285	-0.0020972	0.0084023	-0.0212757	0.135473
957.616	-0.0012039	0.00944183	-0.0167915	0.12672
957.947	-0.0032565	0.00890602	-0.0187048	0.121687
958.278	-0.003494	0.00676638	-0.0236672	0.138426
958.609	-0.0014449	0.00907948	-0.0134135	0.123419
958.94	-0.0018331	0.00853298	-0.018914	0.14182
959.272	-0.0015726	0.00896067	-0.0156855	0.122826
959.603	-0.0045256	0.00506632	-0.0200799	0.13402
959.934	-0.0050467	0.00517086	-0.0208571	0.125849
960.265	-0.0031785	0.00698379	-0.0169111	0.126662
960.596	-0.004148	0.00569359	-0.0249825	0.128708
960.927	-0.0034319	0.0065466	-0.0261484	0.130649
961.258	-0.0038963	0.00479663	-0.0240558	0.133811
961.589	-0.0056866	0.00664283	-0.0205582	0.125779
961.921	-0.0034195	0.0073699	-0.0282111	0.143936
962.252	-0.0017498	0.00710022	-0.0248032	0.135799
962.583	-0.0022142	0.00648245	-0.0263577	0.145215
962.914	-0.0015655	0.00776789	-0.0155659	0.134113
963.245	-9.781e-05	0.00851398	-0.0230992	0.13037
963.576	-0.0009752	0.0076883	-0.0200799	0.126581
963.907	-0.0014573	0.00811242	-0.0269257	0.135601
964.238	-0.0031235	0.00947865	-0.0209767	0.144215
964.57	-0.0039477	0.00664283	-0.018346	0.129406
964.901	-0.0018172	0.00752554	-0.0201098	0.141855
965.232	-0.0042774	0.00751484	-0.0186151	0.139507
965.563	-0.0030987	0.00704438	-0.0263577	0.139414
965.894	-0.0050503	0.00839755	-0.0232487	0.139995
966.225	-0.0024198	0.00613435	-0.0259093	0.141809
966.556	0.00011312	0.00609396	-0.0226508	0.136543
966.887	-0.0005409	0.00564489	-0.030782	0.157804
967.219	-0.0024517	0.0076087	-0.0248929	0.131091
967.55	-0.0052594	0.00627098	-0.0226807	0.134172
967.881	-0.0045929	0.00753385	-0.0176884	0.145377
968.212	-0.0038201	0.00777859	-0.0247733	0.133311
968.543	-0.0021983	0.00781898	-0.0225312	0.149272
968.874	-0.0049138	0.00689826	-0.0238167	0.143645
969.205	-0.0052204	0.00697073	-0.0228003	0.148016
969.536	-0.0048181	0.00528254	-0.0204685	0.142622
969.868	-0.0041782	0.00347436	-0.0252815	0.154828
970.199	-0.0032777	0.00690301	-0.0273741	0.157071
970.53	-0.0033805	0.00611653	-0.020618	0.130196
970.861	-0.00485	0.00671768	-0.0247733	0.152154
971.192	-0.0040169	0.00548925	-0.0290183	0.153131
971.523	-0.0052151	0.00594902	-0.0310809	0.141018
971.854	-0.0055005	0.0037476	-0.0211561	0.146947
972.185	-0.0047968	0.00564726	-0.0284802	0.143332
972.517	-0.0049528	0.00712755	-0.0236672	0.141971
972.848	-0.0027034	0.0065965	-0.0199304	0.146819
973.179	-0.0039602	0.00890246	-0.0313799	0.148946
973.51	-0.0044441	0.0067058	-0.0349373	0.142204
973.841	-0.0041941	0.0054845	-0.0255505	0.154456
974.172	-0.0025404	0.00372503	-0.0361032	0.140577
974.503	-0.006922	0.00323675	-0.0216643	0.137124
974.834	-0.0077587	0.0032522	-0.0275833	0.136671
975.166	-0.0062591	0.00359791	-0.0271947	0.149225
975.497	-0.0075974	0.00187289	-0.0341302	0.151771
975.828	-0.0074751	0.00146421	-0.0319479	0.135659
976.159	-0.0079838	0.00462199	-0.0313201	0.147202
976.49	-0.0040807	0.00386284	-0.0255804	0.155223
976.821	-0.0050999	0.00382364	-0.0313799	0.14561
977.152	-0.0090952	-0.0008109	-0.0257	0.146993
977.483	-0.0058124	0.00076803	-0.0283905	0.148167
977.815	-0.0072251	0.00169231	-0.027673	0.138194
978.146	-0.0085226	0.00185626	-0.0306026	0.146075
978.477	-0.0069646	0.00086188	-0.0316489	0.15019
978.808	-0.0081114	0.00163291	-0.0260886	0.148783
979.139	-0.0072322	0.00164954	-0.025431	0.144971
979.47	-0.0075637	0.00225069	-0.0325458	0.151131
979.801	-0.0060181	0.00050666	-0.0325757	0.142774
980.132	-0.0081061	0.00091297	-0.031619	0.132219
980.464	-0.0072198	-0.0012504	-0.0391225	0.140216
980.795	-0.0092813	-0.0005269	-0.0339209	0.1401
981.126	-0.0067058	0.00072288	-0.0299749	0.138228
981.457	-0.0085723	0.00149154	-0.0262082	0.147633
981.788	-0.0092175	-0.0009427	-0.0335622	0.141878
982.119	-0.0071755	-0.0004307	-0.0415738	0.143762
982.45	-0.0097244	0.00010511	-0.0334725	0.147144
982.781	-0.0077534	-0.0005863	-0.0306026	0.136799
983.113	-0.0108216	-0.0003642	-0.027404	0.144738
983.444	-0.0097421	-0.002505	-0.0320077	0.148063
983.775	-0.0099371	-0.0025763	-0.0353558	0.14783
984.106	-0.0099283	-0.0020868	-0.0382256	0.141344
984.437	-0.0083844	-0.0026131	-0.0323066	0.145436
984.768	-0.0090952	-0.0018658	-0.0283606	0.142413
985.099	-0.009728	-0.0018088	-0.0339508	0.128243
985.43	-0.0098006	-0.0010556	-0.0309315	0.147075
985.762	-0.0100913	-0.0013882	-0.0332333	0.140077
986.093	-0.0105008	-0.0021771	-0.0199005	0.147493
986.424	-0.0126774	-0.0026927	-0.0352362	0.14454
986.755	-0.0116423	-0.0024111	-0.0365217	0.143076
987.086	-0.0111336	-0.0027652	-0.0297656	0.136403
987.417	-0.0098662	-0.0030052	-0.0332931	0.16171
987.748	-0.008941	-0.0010295	-0.0391823	0.143215
988.079	-0.0112913	-0.0015807	-0.0290183	0.15112
988.411	-0.0086254	0.00037241	-0.0336518	0.147086
988.742	-0.0101215	-0.0009653	-0.0336518	0.150783
989.073	-0.0072553	0.00027499	-0.0340704	0.15785
989.404	-0.0085102	-0.0025442	-0.0330839	0.162372
989.735	-0.0084234	-0.0002905	-0.0392719	0.158141
990.066	-0.0073297	-0.0016971	-0.0361928	0.147714
990.397	-0.0059436	8.8763e-06	-0.0316489	0.173752
990.728	-0.0082514	-0.0031525	-0.0368206	0.16515
991.06	-0.0109528	-0.000938	-0.0325159	0.154363
991.391	-0.0082071	-0.0020595	-0.0348775	0.15427
991.722	-0.0095613	-0.0013229	-0.0330839	0.162767
992.053	-0.0103873	-0.0011376	-0.0304233	0.154886
992.384	-0.0106373	-0.0011114	-0.0365815	0.166917
992.715	-0.0099797	-0.0017399	-0.0264175	0.155781
993.046	-0.0089551	9.679e-05	-0.0427098	0.159373
993.377	-0.0092192	-0.0006481	-0.0297058	0.170463
993.709	-0.0084517	-0.0004461	-0.0293471	0.159478
994.04	-0.0113321	-0.0020809	-0.0416635	0.150957
994.371	-0.0128281	-0.0066429	-0.0291976	0.147772
994.702	-0.0123105	-0.0034008	-0.0326354	0.152468
995.033	-0.0107011	-0.0065348	-0.0384947	0.152852
995.364	-0.013491	-0.0052541	-0.0336817	0.155374
995.695	-0.0117185	-0.0051769	-0.0380164	0.149132
996.026	-0.0119294	-0.0037441	-0.0330839	0.160931
996.358	-0.0133882	-0.0052089	-0.035595	0.146703
996.689	-0.0137144	-0.0027818	-0.0422315	0.159454
997.02	-0.0128033	-0.0050901	-0.0364918	0.140321
997.351	-0.0128051	-0.002524	-0.0355651	0.155026
997.682	-0.0123708	-0.0059895	-0.0396905	0.144331
998.013	-0.0125711	-0.0073925	-0.0331735	0.153945
998.344	-0.0119135	-0.0072452	-0.0460579	0.152119
998.675	-0.012307	-0.0068853	-0.0391225	0.147098
999.007	-0.0117912	-0.0066215	-0.0416037	0.162558
999.338	-0.012798	-0.0041136	-0.043218	0.154514
999.669	-0.010242	-0.0043488	-0.0331735	0.157002
1000	-0.0117274	-0.0039081	-0.0275833	0.151503
1000.33	-0.0126119	-0.0056331	-0.0297656	0.161617
1000.66	-0.0151306	-0.0051127	-0.0384947	0.147935
1000.99	-0.0127519	-0.0050985	-0.0395111	0.138054
1001.32	-0.0139164	-0.006536	-0.0386143	0.150039
1001.66	-0.0141717	-0.0081256	-0.0405873	0.154479
1001.99	-0.0128901	-0.0078119	-0.0462971	0.153945
1002.32	-0.0154709	-0.0092233	-0.044055	0.143855
1002.65	-0.0152724	-0.0086922	-0.0389132	0.139333
1002.98	-0.0145528	-0.0082919	-0.0490772	0.138356
1003.31	-0.0164281	-0.0095619	-0.0441148	0.15105
1003.64	-0.0140972	-0.0076765	-0.0389132	0.151992
1003.97	-0.0146113	-0.0075874	-0.0392122	0.148493
1004.3	-0.0157049	-0.0084083	-0.0433674	0.161872
1004.64	-0.015907	-0.0076444	-0.0400193	0.145238
1004.97	-0.0164919	-0.0079212	-0.0469846	0.145029
1005.3	-0.0146272	-0.0074104	-0.0407368	0.15506
1005.63	-0.0155631	-0.0064611	-0.0401389	0.156734
1005.96	-0.0129859	-0.0095536	-0.0357145	0.150573
1006.29	-0.0149427	-0.0082646	-0.038973	0.151143
1006.62	-0.0187218	-0.0085604	-0.04265	0.140635
1006.95	-0.0170627	-0.0114794	-0.0354754	0.148063
1007.28	-0.015751	-0.0127185	-0.0369701	0.15148
1007.62	-0.0180163	-0.0118583	-0.0421717	0.155026
1007.95	-0.0167135	-0.011237	-0.0401987	0.147505
1008.28	-0.0167348	-0.0120995	-0.0360434	0.152189
1008.61	-0.015634	-0.0109281	-0.0401987	0.147388
1008.94	-0.0194343	-0.0112299	-0.0395111	0.158629
1009.27	-0.0155188	-0.0109483	-0.0449219	0.141611
1009.6	-0.0167915	-0.0108343	-0.0442643	0.149016
1009.93	-0.0174562	-0.0117538	-0.0489875	0.151399
1010.26	-0.0150473	-0.0120461	-0.0446529	0.15427
1010.6	-0.0178107	-0.0100454	-0.0420521	0.160268
1010.93	-0.0160293	-0.010523	-0.0466259	0.151782
1011.26	-0.0176441	-0.0109531	-0.0475825	0.149527
1011.59	-0.0159442	-0.0095548	-0.038704	0.160419
1011.92	-0.0148647	-0.0088408	-0.0403481	0.162698
1012.25	-0.0178089	-0.0081541	-0.0298852	0.154723
1012.58	-0.0166816	-0.0130357	-0.0407368	0.155781
1012.91	-0.0170432	-0.0105456	-0.0433375	0.148028
1013.25	-0.0187962	-0.0132828	-0.0370299	0.148365
1013.58	-0.0185144	-0.0151397	-0.046028	0.150446
1013.91	-0.0188582	-0.0157111	-0.0376278	0.141983
1014.24	-0.0176671	-0.012248	-0.0485391	0.143122
1014.57	-0.0184559	-0.0146597	-0.0438458	0.147551
1014.9	-0.0167933	-0.0120389	-0.0442045	0.152794
1015.23	-0.0203667	-0.0137461	-0.0438756	0.139716
1015.56	-0.018447	-0.0131236	-0.0444137	0.143971
1015.89	-0.0176157	-0.0157705	-0.051409	0.15119
1016.23	-0.0194946	-0.0167732	-0.0472836	0.146098
1016.56	-0.019312	-0.0168089	-0.0413047	0.132509
1016.89	-0.0213557	-0.0131592	-0.0417233	0.152608
1017.22	-0.0200033	-0.0149294	-0.0589423	0.149051
1017.55	-0.0181368	-0.0122908	-0.0398997	0.153596
1017.88	-0.0192429	-0.0160473	-0.0467156	0.155828
1018.21	-0.0192358	-0.0160355	-0.0505121	0.143273
1018.54	-0.0200724	-0.0158632	-0.0488979	0.149655
1018.87	-0.0198048	-0.015982	-0.0422913	0.158246
1019.21	-0.0182148	-0.0135857	-0.0416934	0.142797
1019.54	-0.0200068	-0.0150601	-0.0474928	0.150957
1019.87	-0.0198065	-0.0133778	-0.0450415	0.159524
1020.2	-0.0183353	-0.0143354	-0.0401688	0.154421
1020.53	-0.0205191	-0.011692	-0.0438159	0.159838
1020.86	-0.020707	-0.0149306	-0.0511399	0.157804
1021.19	-0.0174473	-0.0137117	-0.0483	0.151492
1021.52	-0.0187749	-0.0133873	-0.0503029	0.152038
1021.85	-0.0207655	-0.0157028	-0.0445034	0.147586
1022.19	-0.0203879	-0.0150827	-0.0452807	0.149283
1022.52	-0.0190621	-0.0146015	-0.0464465	0.152922
1022.85	-0.0193687	-0.0137342	-0.0460579	0.154061
1023.18	-0.0174314	-0.0146027	-0.0420222	0.148063
1023.51	-0.019608	-0.017884	-0.0494659	0.160384
1023.84	-0.0231442	-0.0167008	-0.0469248	0.148818
1024.17	-0.0215401	-0.0166889	-0.0421119	0.143982
1024.5	-0.0201841	-0.0146455	-0.0477619	0.158094
1024.83	-0.0198225	-0.0152668	-0.0479711	0.15198
1025.17	-0.0219868	-0.0182226	-0.0512894	0.150527
1025.5	-0.02313	-0.0207638	-0.0481505	0.16071
1025.83	-0.0208878	-0.0175074	-0.0417233	0.15026
1026.16	-0.0218538	-0.0176096	-0.0532923	0.156328
1026.49	-0.0230343	-0.0169467	-0.0455497	0.155467
1026.82	-0.0183974	-0.0191445	-0.0476124	0.148748
1027.15	-0.0213504	-0.0176904	-0.0430685	0.154909
1027.48	-0.0199873	-0.01674	-0.0440251	0.144343
1027.81	-0.0201398	-0.0157515	-0.048868	0.151399
1028.15	-0.0195495	-0.016039	-0.0487484	0.161686
1028.48	-0.0185321	-0.0174041	-0.0485092	0.166638
1028.81	-0.0189203	-0.0174753	-0.0463868	0.161919
1029.14	-0.020193	-0.0142285	-0.0483299	0.166557
1029.47	-0.0222367	-0.018503	-0.0504524	0.14246
1029.8	-0.0207105	-0.0158228	-0.0496751	0.151027
1030.13	-0.0222668	-0.0143104	-0.0475526	0.157688
1030.46	-0.0202071	-0.0153939	-0.0507214	0.166778
1030.79	-0.0205616	-0.0161614	-0.0474032	0.158536
1031.13	-0.0212707	-0.0167316	-0.0481804	0.166952
1031.46	-0.0231495	-0.017018	-0.0436963	0.163372
1031.79	-0.0201859	-0.0184163	-0.0496153	0.153561
1032.12	-0.0207034	-0.0174254	-0.0462074	0.162279
1032.45	-0.0205102	-0.0159202	-0.0497947	0.166685
1032.78	-0.0229936	-0.0174219	-0.0445931	0.148295
1033.11	-0.0216003	-0.0187786	-0.045191	0.155851
1033.44	-0.0239224	-0.0183236	-0.0450116	0.156885
1033.77	-0.0221232	-0.0191338	-0.0513492	0.158083
1034.11	-0.0237894	-0.0189307	-0.0509008	0.159292
1034.44	-0.0232701	-0.018244	-0.0476423	0.170253
1034.77	-0.0238461	-0.0178413	-0.0499143	0.159466
1035.1	-0.0237238	-0.0184448	-0.046327	0.15613
1035.43	-0.0208967	-0.0188154	-0.0565508	0.160931
1035.76	-0.0211466	-0.0192693	-0.0572981	0.146784
1036.09	-0.0240358	-0.0191814	-0.0459981	0.153828
1036.42	-0.0241227	-0.0205654	-0.0495256	0.1542
1036.75	-0.0228748	-0.0200593	-0.0469547	0.161826
1037.09	-0.0252021	-0.0210002	-0.0428592	0.163546
1037.42	-0.0236565	-0.0223475	-0.0473733	0.159536
1037.75	-0.0222686	-0.018762	-0.053382	0.159943
1038.08	-0.0221959	-0.0186812	-0.050273	0.153607
1038.41	-0.0250125	-0.0205238	-0.0557137	0.160489
1038.74	-0.024112	-0.0200249	-0.0482402	0.162337
1039.07	-0.0219779	-0.0179149	-0.0506616	0.157118
1039.4	-0.0231708	-0.0208648	-0.0522759	0.158292
1039.74	-0.0232027	-0.021239	-0.0460878	0.155339
1040.07	-0.024284	-0.0206367	-0.0555344	0.154282
1040.4	-0.025071	-0.0225007	-0.0478815	0.150585
1040.73	-0.0262178	-0.0248399	-0.0630378	0.14325
1041.06	-0.0260334	-0.0233597	-0.0552952	0.151062
1041.39	-0.0269162	-0.0259947	-0.0502132	0.142692
1041.72	-0.0249469	-0.0251975	-0.0556539	0.147528
1042.05	-0.0283023	-0.0247104	-0.056491	0.150945
1042.38	-0.0280842	-0.026445	-0.0532325	0.143273
1042.72	-0.0250178	-0.0252082	-0.0551457	0.14783
1043.05	-0.0254396	-0.0237541	-0.0576568	0.149481
1043.38	-0.0249522	-0.0224579	-0.0518275	0.15563
1043.71	-0.0252464	-0.0215075	-0.0473733	0.145424
1044.04	-0.0252695	-0.0211927	-0.0509307	0.157385
1044.37	-0.0273717	-0.02539	-0.0546375	0.154258
1044.7	-0.0273256	-0.0239026	-0.0569095	0.138914
1045.03	-0.0278503	-0.0248043	-0.0542788	0.144715
1045.36	-0.0260937	-0.0251061	-0.0546375	0.154514
1045.7	-0.0273646	-0.0260565	-0.048001	0.1479
1046.03	-0.0264783	-0.0270996	-0.0509008	0.145459
1046.36	-0.0263401	-0.0284266	-0.0568198	0.1474
1046.69	-0.0270544	-0.0257072	-0.0507812	0.155444
1047.02	-0.0284193	-0.0240867	-0.0499143	0.140716
1047.35	-0.028265	-0.0258379	-0.052814	0.149632
1047.68	-0.0279814	-0.0262691	-0.0593608	0.149144
1048.01	-0.027315	-0.0251429	-0.0492267	0.152701
1048.34	-0.0278432	-0.0253603	-0.0523058	0.144075
1048.68	-0.0277227	-0.0263119	-0.0549963	0.138961
1049.01	-0.0265492	-0.0271114	-0.0513492	0.147877
1049.34	-0.0273947	-0.0251987	-0.0492267	0.158978
1049.67	-0.0254556	-0.0253781	-0.0489576	0.157676
1050	-0.0265634	-0.0268679	-0.0562817	0.141018
1050.33	-0.0276358	-0.0266956	-0.0583743	0.142971
1050.66	-0.0278999	-0.027197	-0.054219	0.149132
1050.99	-0.0298036	-0.0289042	-0.0543984	0.149702
1051.32	-0.0289705	-0.0265923	-0.0526944	0.140763
1051.66	-0.0277741	-0.0283826	-0.0520367	0.150573
1051.99	-0.0309876	-0.0263772	-0.0494957	0.144471
1052.32	-0.0305321	-0.0261503	-0.0556838	0.152875
1052.65	-0.0303726	-0.0284789	-0.0598391	0.149388
1052.98	-0.0290006	-0.028966	-0.0535912	0.141669
1053.31	-0.0291921	-0.0289184	-0.0606762	0.145366
1053.64	-0.0299312	-0.0277708	-0.0540397	0.153689
1053.97	-0.0289404	-0.0254304	-0.0596	0.149609
1054.3	-0.0286461	-0.0259068	-0.0542788	0.154444
1054.64	-0.0284317	-0.0286464	-0.0523357	0.150097
1054.97	-0.0268169	-0.027159	-0.057059	0.152829
1055.3	-0.0270261	-0.0243647	-0.0549664	0.146865
1055.63	-0.0283714	-0.0267907	-0.0561322	0.150608
1055.96	-0.0275082	-0.025169	-0.0578362	0.155095
1056.29	-0.030915	-0.0273716	-0.0534717	0.150806
1056.62	-0.028102	-0.0272303	-0.0612441	0.144203
1056.95	-0.0303885	-0.0274892	-0.0535613	0.141611
1057.28	-0.030206	-0.0279668	-0.0544881	0.146191
1057.62	-0.0320795	-0.0297275	-0.0528439	0.14611
1057.95	-0.0294881	-0.030312	-0.0531129	0.14432
1058.28	-0.0291885	-0.0300649	-0.0525748	0.148725
1058.61	-0.0311224	-0.0300316	-0.0585836	0.139984
1058.94	-0.0306509	-0.0305532	-0.0526645	0.149841
1059.27	-0.0308653	-0.0298487	-0.0642037	0.142541
1059.6	-0.0305853	-0.0286096	-0.0552653	0.142855
1059.93	-0.0305906	-0.0275926	-0.056192	0.149597
1060.26	-0.0299525	-0.0296788	-0.0616627	0.149992
1060.6	-0.0315956	-0.0306375	-0.0618121	0.140077
1060.93	-0.0305268	-0.0302253	-0.056491	0.150306
1061.26	-0.0294952	-0.0285442	-0.0602576	0.15162
1061.59	-0.0317303	-0.0300423	-0.0500637	0.147051
1061.92	-0.0303956	-0.0325859	-0.0616328	0.142018
1062.25	-0.0301191	-0.0319895	-0.0607061	0.139612
1062.58	-0.0333522	-0.0314335	-0.0550262	0.150539
1062.91	-0.0307891	-0.0300732	-0.0569992	0.1474
1063.25	-0.0326857	-0.0328829	-0.0616627	0.144482
1063.58	-0.0307838	-0.0319253	-0.0569992	0.149783
1063.91	-0.0316382	-0.0298926	-0.0541293	0.154479
1064.24	-0.0328949	-0.0313967	-0.0658777	0.155374
1064.57	-0.0307342	-0.031942	-0.0630976	0.151097
1064.9	-0.030658	-0.0318576	-0.0575074	0.157885
1065.23	-0.0324624	-0.0295861	-0.0596299	0.157548
1065.56	-0.031702	-0.028549	-0.0571486	0.153247
1065.89	-0.0331625	-0.0307611	-0.0572383	0.143204
1066.23	-0.0330633	-0.0310569	-0.051678	0.143459
1066.56	-0.0321593	-0.0333379	-0.0633965	0.141274
1066.89	-0.0334834	-0.0325431	-0.0607957	0.150248
1067.22	-0.0333043	-0.0308775	-0.0583444	0.151899
1067.55	-0.0336677	-0.031645	-0.0693455	0.154781
1067.88	-0.0339956	-0.0336991	-0.0566404	0.13552
1068.21	-0.0325404	-0.0322022	-0.0693754	0.137903
1068.54	-0.0345292	-0.032694	-0.0585537	0.140367
1068.87	-0.0351637	-0.032833	-0.0583743	0.133951
1069.21	-0.0345575	-0.0347362	-0.058165	0.143436
1069.54	-0.0339513	-0.034324	-0.0659076	0.145273
1069.87	-0.0334018	-0.0312743	-0.0535315	0.141367
1070.2	-0.0344441	-0.0326287	-0.0678508	0.141727
1070.53	-0.0328346	-0.0338785	-0.0630079	0.145598
1070.86	-0.0345611	-0.0362688	-0.0582547	0.142692
1071.19	-0.0331058	-0.0347065	-0.0609452	0.139356
1071.52	-0.033042	-0.0323958	-0.0609452	0.145087
1071.85	-0.0349634	-0.0368176	-0.056192	0.14783
1072.19	-0.0358621	-0.0355001	-0.0579857	0.138519
1072.52	-0.0365587	-0.0341778	-0.0709896	0.134764
1072.85	-0.0371259	-0.035133	-0.0621709	0.134416
1073.18	-0.0360163	-0.0367689	-0.0614235	0.13244
1073.51	-0.0370816	-0.0346756	-0.0610947	0.135636
1073.84	-0.0357823	-0.0362854	-0.0596299	0.135927
1074.17	-0.0341303	-0.0371396	-0.0637553	0.141123
1074.5	-0.0352169	-0.0363579	-0.062141	0.13559
1074.83	-0.0349528	-0.0342182	-0.0506915	0.143494
1075.17	-0.0334869	-0.0351093	-0.0553251	0.135938
1075.5	-0.0338184	-0.0338404	-0.0656386	0.144947
1075.83	-0.0339105	-0.0330765	-0.0589722	0.133637
1076.16	-0.0344441	-0.0340483	-0.0601082	0.135195
1076.49	-0.0349032	-0.0349429	-0.0670137	0.13953
1076.82	-0.0347241	-0.0347481	-0.053382	0.150573
1077.15	-0.0348447	-0.0343822	-0.0670735	0.147098
1077.48	-0.0353286	-0.0364042	-0.0631574	0.145668
1077.81	-0.0337333	-0.0345438	-0.0572383	0.136822
1078.15	-0.0356671	-0.0378821	-0.0653695	0.139926
1078.48	-0.0358851	-0.0373035	-0.066655	0.135009
1078.81	-0.0362202	-0.0379974	-0.0643232	0.136101
1079.14	-0.0353481	-0.0370398	-0.0581053	0.138984
1079.47	-0.0368228	-0.0369614	-0.0617822	0.128731
1079.8	-0.0376559	-0.0385189	-0.0695846	0.132137
1080.13	-0.0359826	-0.0381708	-0.0640841	0.140088
1080.46	-0.0360589	-0.03718	-0.0579558	0.129801
1080.79	-0.0359117	-0.0357258	-0.0688373	0.140228
1081.13	-0.0376719	-0.036763	-0.0626492	0.130208
1081.46	-0.0366846	-0.0354372	-0.0625296	0.13044
1081.79	-0.0361741	-0.0388385	-0.0709299	0.13538
1082.12	-0.0368299	-0.037275	-0.0659674	0.133602
1082.45	-0.0368459	-0.0410328	-0.0645624	0.126046
1082.78	-0.037273	-0.0406977	-0.0630976	0.129022
1083.11	-0.0397067	-0.0408843	-0.0630378	0.133149
1083.44	-0.0383738	-0.0369947	-0.0615132	0.142808
1083.77	-0.0365569	-0.03639	-0.0609153	0.131277
1084.11	-0.0357912	-0.0401916	-0.0675518	0.134172
1084.44	-0.0377711	-0.0389608	-0.0665653	0.138356
1084.77	-0.0366846	-0.0385367	-0.0596	0.129452
1085.1	-0.0364807	-0.0368735	-0.062141	0.14103
1085.43	-0.0382461	-0.0373926	-0.0613338	0.132474
1085.76	-0.0359809	-0.0375019	-0.0723648	0.140367
1086.09	-0.0388949	-0.0388717	-0.0609452	0.145482
1086.42	-0.0361758	-0.0383502	-0.061005	0.137961
1086.75	-0.0368334	-0.0376255	-0.0646222	0.140286
1087.09	-0.0362521	-0.0394753	-0.0552653	0.139217
1087.42	-0.0384216	-0.0385914	-0.0692259	0.131637
1087.75	-0.0370692	-0.0393933	-0.0608555	0.132858
1088.08	-0.0355555	-0.0373974	-0.0620812	0.140763
1088.41	-0.0376134	-0.0387838	-0.0633666	0.138647
1088.74	-0.0358603	-0.0373332	-0.0604071	0.136008
1089.07	-0.0374042	-0.0407975	-0.0662664	0.133997
1089.4	-0.0387549	-0.0402807	-0.0631873	0.140216
1089.74	-0.0387035	-0.0406609	-0.0641439	0.13967
1090.07	-0.0367803	-0.038652	-0.0692558	0.13788
1090.4	-0.0370798	-0.0404174	-0.065818	0.131289
1090.73	-0.0386999	-0.0404982	-0.0670137	0.135985
1091.06	-0.0352913	-0.0396939	-0.0687476	0.131893
1091.39	-0.037273	-0.0389418	-0.0691362	0.142774
1091.72	-0.0387513	-0.0409092	-0.0679105	0.139821
1092.05	-0.040811	-0.0416541	-0.0632471	0.131161
1092.38	-0.0403661	-0.0415816	-0.0670137	0.137461
1092.72	-0.040873	-0.0419464	-0.069196	0.130231
1093.05	-0.041263	-0.0432817	-0.0653994	0.132672
1093.38	-0.0400541	-0.0414343	-0.0704216	0.129557
1093.71	-0.0403324	-0.0400182	-0.0714381	0.130243
1094.04	-0.0381168	-0.0423396	-0.0628584	0.131882
1094.37	-0.040476	-0.0413167	-0.0707206	0.122303
1094.7	-0.0395171	-0.0435158	-0.0658777	0.136543
1095.03	-0.0387425	-0.0405873	-0.0667447	0.135729
1095.36	-0.0390757	-0.0430489	-0.0675817	0.144982
1095.7	-0.0390615	-0.0415603	-0.0667148	0.137845
1096.03	-0.0402899	-0.0418394	-0.0690465	0.132068
1096.36	-0.0384163	-0.042241	-0.0613039	0.128859
1096.69	-0.0416618	-0.0428564	-0.0642037	0.130603
1097.02	-0.0399744	-0.0422683	-0.0738894	0.134369
1097.35	-0.0420376	-0.0405587	-0.0704515	0.146028
1097.68	-0.0413906	-0.0420652	-0.0662664	0.132149
1098.01	-0.0403076	-0.0422588	-0.0692857	0.141983
1098.34	-0.0408943	-0.0439993	-0.0689269	0.139542
1098.68	-0.0405008	-0.044168	-0.0807949	0.137589
1099.01	-0.0408181	-0.0446301	-0.0687177	0.116084
1099.34	-0.0432057	-0.0462648	-0.0622605	0.124814
1099.67	-0.0425782	-0.0459678	-0.0715875	0.134532
1100	-0.0416281	-0.0454285	-0.0689568	0.122931
1100.33	-0.0414509	-0.0450447	-0.0707505	0.129685
1100.66	-0.039806	-0.0447216	-0.0639944	0.123803
1100.99	-0.0415395	-0.0455425	-0.0730224	0.128615
1101.32	-0.0422308	-0.0472699	-0.0673426	0.130161
1101.66	-0.0410627	-0.04389	-0.06806	0.128906
1101.99	-0.0402881	-0.0447691	-0.0656087	0.129998
1102.32	-0.042564	-0.0470727	-0.0674322	0.120362
1102.65	-0.0408766	-0.0456102	-0.072305	0.13194
1102.98	-0.0419667	-0.0436334	-0.0706907	0.123826
1103.31	-0.0423336	-0.0466391	-0.063815	0.120618
1103.64	-0.0399726	-0.0450828	-0.0745171	0.124291
1103.97	-0.0401747	-0.047182	-0.0714679	0.128627
1104.3	-0.0403714	-0.0449022	-0.0714978	0.120188
1104.64	-0.0428636	-0.0454415	-0.0663262	0.121989
1104.97	-0.0408571	-0.0484615	-0.066655	0.128964
1105.3	-0.0430054	-0.0449687	-0.0656087	0.128092
1105.63	-0.0430018	-0.0492017	-0.0671333	0.126906
1105.96	-0.0443401	-0.0483736	-0.0653098	0.120397
1106.29	-0.0465292	-0.0467258	-0.0712587	0.124953
1106.62	-0.043312	-0.0459999	-0.0779251	0.119316
1106.95	-0.044255	-0.0488381	-0.0687476	0.122408
1107.28	-0.0439998	-0.0488144	-0.0695846	0.118246
1107.62	-0.0430621	-0.0480564	-0.0749058	0.13266
1107.95	-0.0449215	-0.049646	-0.0718865	0.120978
1108.28	-0.0421776	-0.0478224	-0.0657283	0.118316
1108.61	-0.0448559	-0.0492991	-0.068628	0.113457
1108.94	-0.0441522	-0.0472699	-0.0745171	0.108761
1109.27	-0.0435602	-0.0479447	-0.0718566	0.121954
1109.6	-0.043562	-0.0482322	-0.0721555	0.133032
1109.93	-0.0429345	-0.0493205	-0.0770582	0.115329
1110.26	-0.0415998	-0.0459987	-0.0716174	0.134834
1110.6	-0.0433191	-0.0486777	-0.0705711	0.119746
1110.93	-0.04311	-0.0489997	-0.0633367	0.126197
1111.26	-0.0440884	-0.0467341	-0.0677312	0.122013
1111.59	-0.0451076	-0.0474671	-0.0661169	0.120513
1111.92	-0.043507	-0.0481324	-0.0683291	0.122001
1112.25	-0.0435673	-0.0498978	-0.0661468	0.129196
1112.58	-0.0455436	-0.0482976	-0.0701825	0.126569
1112.91	-0.0444057	-0.0507508	-0.075414	0.119502
1113.25	-0.0452902	-0.0495165	-0.0732915	0.115956
1113.58	-0.0441575	-0.0500974	-0.0665653	0.124093
1113.91	-0.0465292	-0.0537043	-0.0688373	0.120943
1114.24	-0.0447123	-0.049463	-0.0639645	0.124489
1114.57	-0.0440778	-0.0511108	-0.0650108	0.131068
1114.9	-0.044395	-0.0480837	-0.0747563	0.123047
1115.23	-0.0443755	-0.0515088	-0.0765798	0.117014
1115.56	-0.0458716	-0.0519341	-0.0747264	0.119118
1115.89	-0.0461304	-0.0503386	-0.0692857	0.120153
1116.23	-0.0438225	-0.050259	-0.0687177	0.126
1116.56	-0.0453044	-0.0479507	-0.0663262	0.118432
1116.89	-0.0447939	-0.051011	-0.0685084	0.122908
1117.22	-0.0466373	-0.051466	-0.0695248	0.117235
1117.55	-0.0439803	-0.0491185	-0.0748759	0.111527
1117.88	-0.0440033	-0.0474992	-0.0690465	0.12364
1118.21	-0.0423389	-0.050019	-0.0644129	0.121792
1118.54	-0.0449091	-0.0498539	-0.0735007	0.120711
1118.87	-0.0463821	-0.0489819	-0.0717071	0.118816
1119.21	-0.047123	-0.0505643	-0.0712288	0.119746
1119.54	-0.0464565	-0.0518106	-0.0676714	0.123745
1119.87	-0.0455241	-0.0512439	-0.0655489	0.108215
1120.2	-0.0451661	-0.0504788	-0.0730822	0.120188
1120.53	-0.0449233	-0.0520636	-0.0699732	0.123826
1120.86	-0.0446131	-0.0516633	-0.0724843	0.124721
1121.19	-0.045175	-0.0499905	-0.0665952	0.11627
1121.52	-0.0454444	-0.05127	-0.0718566	0.11527
1121.85	-0.0454213	-0.05103	-0.0712587	0.117967
1122.19	-0.0458716	-0.0507996	-0.0729029	0.12314
1122.52	-0.0449835	-0.0509338	-0.0774468	0.118618
1122.85	-0.0440352	-0.0522846	-0.0640841	0.118118
1123.18	-0.0470822	-0.0502245	-0.0724545	0.11255
1123.51	-0.0459318	-0.050619	-0.0711989	0.131707
1123.84	-0.0425587	-0.0520387	-0.0681796	0.129429
1124.17	-0.0450615	-0.0506831	-0.0659375	0.127116
1124.5	-0.0451165	-0.050758	-0.0749357	0.127127
1124.83	-0.0452441	-0.0485399	-0.066356	0.127522
1125.17	-0.0452849	-0.0488488	-0.0698238	0.133707
1125.5	-0.0443844	-0.0517476	-0.0625296	0.132567
1125.83	-0.044863	-0.0479637	-0.0761613	0.131033
1126.16	-0.0443933	-0.0498206	-0.0732018	0.122977
1126.49	-0.0453735	-0.0507425	-0.0713185	0.120931
1126.82	-0.0467171	-0.0500226	-0.0721854	0.127104
1127.15	-0.0457422	-0.051573	-0.0716174	0.127441
1127.48	-0.0463377	-0.0514803	-0.0712886	0.128743
1127.81	-0.0467135	-0.0525887	-0.0667447	0.123187
1128.15	-0.0492163	-0.053987	-0.0773272	0.123965
1128.48	-0.0476636	-0.0517488	-0.0684486	0.118095
1128.81	-0.0463927	-0.0540227	-0.0706309	0.122629
1129.14	-0.0460063	-0.0499858	-0.0751748	0.133416
1129.47	-0.0485091	-0.0530437	-0.0760716	0.117956
1129.8	-0.0473676	-0.0539336	-0.0723349	0.118886
1130.13	-0.0480465	-0.0516787	-0.0685981	0.129464
1130.46	-0.0460665	-0.0535938	-0.0689568	0.124372
1130.79	-0.0467844	-0.053652	-0.0708103	0.119606
1131.13	-0.0472063	-0.0546084	-0.0646521	0.113085
1131.46	-0.0490852	-0.0538362	-0.0751748	0.118118
1131.79	-0.0490196	-0.055383	-0.0794796	0.120885
1132.12	-0.0479419	-0.0540975	-0.0708701	0.119467
1132.45	-0.0492872	-0.0532647	-0.0755933	0.119757
1132.78	-0.0463927	-0.0523012	-0.0769386	0.132242
1133.11	-0.0459496	-0.0525555	-0.0754439	0.120594
1133.44	-0.046499	-0.0530485	-0.067492	0.111713
1133.77	-0.047699	-0.0565615	-0.0709896	0.119664
1134.11	-0.0484205	-0.0520612	-0.0770283	0.117514
1134.44	-0.0468854	-0.0566007	-0.0778354	0.122199
1134.77	-0.0473499	-0.0542829	-0.0689568	0.113957
1135.1	-0.0484382	-0.0545894	-0.0680301	0.11777
1135.43	-0.0487076	-0.0553663	-0.0723349	0.11176
1135.76	-0.0478462	-0.0533906	-0.0726936	0.106204
1136.09	-0.048385	-0.0545632	-0.0748759	0.114317
1136.42	-0.0480447	-0.0550468	-0.0775066	0.120257
1136.75	-0.0474013	-0.0534655	-0.0710494	0.126186
1137.09	-0.047403	-0.0554388	-0.0812433	0.125151
1137.42	-0.04766	-0.0558511	-0.0670436	0.118328
1137.75	-0.0497304	-0.0546583	-0.0705113	0.117572
1138.08	-0.0496683	-0.0547153	-0.0693156	0.112341
1138.41	-0.0485871	-0.0543339	-0.0718865	0.122303
1138.74	-0.0484506	-0.0545953	-0.0749058	0.123128
1139.07	-0.0492855	-0.054998	-0.0722452	0.122559
1139.4	-0.0479401	-0.0544527	-0.0716473	0.120269
1139.74	-0.0479348	-0.054309	-0.0777756	0.113655
1140.07	-0.0493404	-0.0561148	-0.079928	0.116642
1140.4	-0.0488849	-0.0562597	-0.0742182	0.115398
1140.73	-0.0503862	-0.0571662	-0.0753841	0.111597
1141.06	-0.0492766	-0.0572173	-0.0716174	0.116026
1141.39	-0.0477239	-0.0561433	-0.0760418	0.117293
1141.72	-0.0512051	-0.054233	-0.07936	0.127383
1142.05	-0.0498473	-0.0581012	-0.0693754	0.114282
1142.38	-0.0482397	-0.0582651	-0.0727833	0.0972993
1142.72	-0.0508205	-0.0580976	-0.0671333	0.118432
1143.05	-0.0493085	-0.0564213	-0.0829473	0.120036
1143.38	-0.0484329	-0.0551275	-0.073441	0.125953
1143.71	-0.0485091	-0.0540464	-0.0727534	0.119943
1144.04	-0.0493599	-0.0554887	-0.0725441	0.122989
1144.37	-0.0489008	-0.056988	-0.0803465	0.117979
1144.7	-0.0500618	-0.0564379	-0.0695248	0.113376
1145.03	-0.0486987	-0.0551953	-0.0763407	0.11634
1145.36	-0.0499874	-0.0570498	-0.0714978	0.122745
1145.7	-0.0490834	-0.0573551	-0.0693754	0.120408
1146.03	-0.0494751	-0.0571757	-0.0769984	0.109447
1146.36	-0.0510934	-0.0581772	-0.0795992	0.116607
1146.69	-0.0506273	-0.0557465	-0.0761314	0.119037
1147.02	-0.0491366	-0.0554887	-0.0742481	0.110121
1147.35	-0.0458751	-0.0557964	-0.0715576	0.111923
1147.68	-0.0513504	-0.0562122	-0.0711989	0.111353
1148.01	-0.0503224	-0.05719	-0.0737698	0.123965
1148.34	-0.0499112	-0.0579158	-0.0823195	0.115329
1148.68	-0.0503826	-0.0586512	-0.0775962	0.106703
1149.01	-0.0511501	-0.0598345	-0.0797486	0.118223
1149.34	-0.0505652	-0.0604939	-0.0770582	0.10575
1149.67	-0.0508825	-0.0587332	-0.0792105	0.109726
1150	-0.0516979	-0.0598405	-0.0741883	0.10818
1150.33	-0.0507939	-0.058574	-0.0824989	0.103425
1150.66	-0.0504465	-0.059465	-0.0695547	0.108412
1150.99	-0.050372	-0.0568288	-0.0741584	0.115468
1151.32	-0.051985	-0.0589376	-0.0729029	0.10811
1151.66	-0.0520081	-0.0604214	-0.0756531	0.108261
1151.99	-0.0539951	-0.0585396	-0.0686878	0.106273
1152.32	-0.0508541	-0.05762	-0.0792703	0.116793
1152.65	-0.0526178	-0.0610095	-0.0747862	0.107308
1152.98	-0.0531531	-0.0602004	-0.0776859	0.103239
1153.31	-0.0526036	-0.0622545	-0.0793002	0.107145
1153.64	-0.0532648	-0.0618589	-0.0762211	0.0991708
1153.97	-0.051237	-0.0607885	-0.075414	0.107075
1154.3	-0.0522544	-0.0604974	-0.0762211	0.103274
1154.64	-0.0508275	-0.0609192	-0.0701825	0.109133
1154.97	-0.050193	-0.0601196	-0.0736801	0.110272
1155.3	-0.0499821	-0.060558	-0.0778952	0.112585
1155.63	-0.0504394	-0.0583043	-0.0716174	0.108807
1155.96	-0.0510757	-0.0595862	-0.0726039	0.114329
1156.29	-0.0523626	-0.0589328	-0.0671931	0.108935
1156.62	-0.052336	-0.0580881	-0.0723947	0.119316
1156.95	-0.0513327	-0.0593177	-0.0772973	0.114643
1157.28	-0.0533853	-0.0592132	-0.072873	0.101844
1157.62	-0.0508807	-0.0592346	-0.0743079	0.112597
1157.95	-0.0506326	-0.0609833	-0.0756232	0.111586
1158.28	-0.0490976	-0.0617104	-0.0809444	0.10861
1158.61	-0.0532541	-0.0627737	-0.0811835	0.114724
1158.94	-0.0534013	-0.0615429	-0.0757727	0.10203
1159.27	-0.051159	-0.0602646	-0.0807351	0.104018
1159.6	-0.0558988	-0.0635471	-0.0823793	0.100845
1159.93	-0.0537788	-0.0623472	-0.0798383	0.117247
1160.26	-0.0517776	-0.0578291	-0.0802867	0.108377
1160.6	-0.05204	-0.059054	-0.0793301	0.109888
1160.93	-0.0518556	-0.0583127	-0.0806156	0.105785
1161.26	-0.0539561	-0.0608075	-0.077955	0.106924
1161.59	-0.0542273	-0.0607327	-0.080197	0.111202
1161.92	-0.0540766	-0.0615251	-0.0774767	0.10217
1162.25	-0.0541971	-0.0608859	-0.0754738	0.0990081
1162.58	-0.0537203	-0.062586	-0.077387	0.102426
1162.91	-0.0524459	-0.0631848	-0.0800177	0.102042
1163.25	-0.052375	-0.060008	-0.0774169	0.117467
1163.58	-0.0526089	-0.0590694	-0.0712288	0.1187
1163.91	-0.0524246	-0.0623163	-0.0775962	0.126023
1164.24	-0.0540766	-0.0600092	-0.067223	0.112469
1164.57	-0.0527419	-0.0615156	-0.0831267	0.109668
1164.9	-0.0558225	-0.0634568	-0.0796589	0.112062
1165.23	-0.0534491	-0.0629293	-0.0783735	0.110958
1165.56	-0.0528606	-0.0620561	-0.0787322	0.105715
1165.89	-0.0528784	-0.0613885	-0.077088	0.104495
1166.23	-0.0553138	-0.0636267	-0.0750552	0.108029
1166.56	-0.0560299	-0.065499	-0.0739492	0.105564
1166.89	-0.0541386	-0.0640746	-0.0767592	0.107331
1167.22	-0.0540961	-0.0655335	-0.0840534	0.103309
1167.55	-0.054151	-0.0642825	-0.0828875	0.102879
1167.88	-0.0546261	-0.0643775	-0.0727534	0.105634
1168.21	-0.0552748	-0.0645367	-0.0778952	0.0977991
1168.54	-0.0512689	-0.0634509	-0.0797486	0.105494
1168.87	-0.054681	-0.0629567	-0.0738894	0.104471
1169.21	-0.0585168	-0.0652246	-0.0792404	0.100891
1169.54	-0.0535856	-0.0626038	-0.0787322	0.118804
1169.87	-0.053419	-0.0623175	-0.0834256	0.113585
1170.2	-0.0530148	-0.0613813	-0.0827978	0.119141
1170.53	-0.0523147	-0.0625468	-0.0860862	0.111051
1170.86	-0.0544169	-0.0622236	-0.0803764	0.114096
1171.19	-0.0543513	-0.0622878	-0.0707505	0.101682
1171.52	-0.0524937	-0.0631289	-0.0784632	0.106494
1171.85	-0.0533197	-0.0635732	-0.0813629	0.0977526
1172.19	-0.0535696	-0.0645106	-0.0717669	0.0938934
1172.52	-0.0544577	-0.0643942	-0.0740986	0.0988918
1172.85	-0.0546084	-0.0630755	-0.0769386	0.106843
1173.18	-0.0551206	-0.0645047	-0.0775664	0.104564
1173.51	-0.055741	-0.0628224	-0.075115	0.115561
1173.84	-0.0533853	-0.0613956	-0.0816021	0.111713
1174.17	-0.0543425	-0.0621238	-0.0758923	0.113887
1174.5	-0.0544134	-0.0629543	-0.0749656	0.1114
1174.83	-0.0548069	-0.0650179	-0.0780746	0.0985082
1175.17	-0.0548122	-0.064488	-0.0841431	0.106668
1175.5	-0.0547448	-0.066377	-0.0764005	0.103111
1175.83	-0.0563401	-0.0656357	-0.0712886	0.110795
1176.16	-0.0551206	-0.0656737	-0.0786126	0.0976945
1176.49	-0.058515	-0.0658222	-0.0831267	0.0983106
1176.82	-0.0544169	-0.0662	-0.0848904	0.0980316
1177.15	-0.0530131	-0.066118	-0.078224	0.10847
1177.48	-0.0568985	-0.0659327	-0.0791806	0.0931959
1177.81	-0.0552979	-0.065467	-0.0740687	0.101903
1178.15	-0.0555762	-0.067186	-0.0787023	0.0975201
1178.48	-0.0540411	-0.0653933	-0.0839338	0.0980781
1178.81	-0.0559643	-0.0656677	-0.0801671	0.0993335
1179.14	-0.0547377	-0.0662083	-0.0764603	0.103332
1179.47	-0.0568985	-0.0663711	-0.0855481	0.0937306
1179.8	-0.0531992	-0.0634592	-0.0837843	0.110656
1180.13	-0.0554166	-0.0633261	-0.078224	0.0992987
1180.46	-0.0545924	-0.0642041	-0.0762809	0.100263
1180.79	-0.0567779	-0.0680569	-0.0783735	0.0995311
1181.13	-0.0572086	-0.0680438	-0.0802867	0.0948698
1181.46	-0.0574887	-0.0659374	-0.0804362	0.100484
1181.79	-0.0557038	-0.0682802	-0.0825587	0.108342
1182.12	-0.0561983	-0.0681709	-0.0758026	0.0921032
1182.45	-0.0559519	-0.0685903	-0.0794796	0.0950093
1182.78	-0.0559324	-0.0657901	-0.0837843	0.104088
1183.11	-0.0578361	-0.0678905	-0.078792	0.0924752
1183.44	-0.0567212	-0.066497	-0.0857573	0.0949279
1183.77	-0.0574373	-0.0653387	-0.0832462	0.0977875
1184.11	-0.0543974	-0.0673987	-0.0719463	0.0967762
1184.44	-0.056216	-0.0666609	-0.0772674	0.0924984
1184.77	-0.0565794	-0.0648242	-0.0834555	0.108052
1185.1	-0.0556719	-0.0674783	-0.0776859	0.0948001
1185.43	-0.0549061	-0.0661952	-0.0733214	0.104297
1185.76	-0.0565936	-0.0664079	-0.0803166	0.0963461
1186.09	-0.0562373	-0.0655715	-0.0714381	0.104913
1186.42	-0.0562125	-0.0658935	-0.0869232	0.0913593
1186.75	-0.0556914	-0.0678133	-0.0781343	0.101647
1187.09	-0.0568967	-0.0677456	-0.0778354	0.0974853
1187.42	-0.0572973	-0.0663604	-0.0794497	0.0970784
1187.75	-0.0560547	-0.0689538	-0.0838441	0.105611
1188.08	-0.0566875	-0.0696987	-0.0755634	0.0933121
1188.41	-0.057884	-0.0673797	-0.078792	0.0991127
1188.74	-0.0594261	-0.0700242	-0.0886272	0.0930564
1189.07	-0.0567956	-0.0671231	-0.0830669	0.0881742
1189.4	-0.059364	-0.0689253	-0.0849203	0.101263
1189.74	-0.0578946	-0.0711802	-0.0852491	0.0855006
1190.07	-0.0607679	-0.0722625	-0.0830669	0.0928123
1190.4	-0.0594881	-0.0725595	-0.0763706	0.0908943
1190.73	-0.0608547	-0.0702072	-0.0799878	0.0928356
1191.06	-0.0590503	-0.0727104	-0.0809444	0.08886
1191.39	-0.058655	-0.0718027	-0.0886571	0.0885927
1191.72	-0.0597061	-0.0715021	-0.0846513	0.0882323
1192.05	-0.058733	-0.0698389	-0.082469	0.0926844
1192.38	-0.0578095	-0.0703902	-0.0795992	0.0911152
1192.72	-0.0590627	-0.0691403	-0.0844121	0.0923822
1193.05	-0.0608104	-0.0717576	-0.0795693	0.0969971
1193.38	-0.0578858	-0.0709153	-0.0800476	0.095265
1193.71	-0.0579832	-0.0710721	-0.0809444	0.0890809
1194.04	-0.0571182	-0.0680402	-0.0787023	0.0939631
1194.37	-0.0581463	-0.0705244	-0.0840534	0.094463
1194.7	-0.0578219	-0.0716792	-0.0800476	0.0967646
1195.03	-0.0587312	-0.0692485	-0.0816917	0.0961252
1195.36	-0.0579265	-0.0711576	-0.0891055	0.0940096
1195.7	-0.0572884	-0.0702749	-0.0746965	0.0931262
1196.03	-0.0586107	-0.0709842	-0.0886571	0.100717
1196.36	-0.0599507	-0.0692687	-0.084173	0.0873489
1196.69	-0.0595555	-0.0709865	-0.0905703	0.100612
1197.02	-0.0586001	-0.0703949	-0.0803166	0.0871164
1197.35	-0.0589635	-0.0706147	-0.0834854	0.0886392
1197.68	-0.0590609	-0.070825	-0.0809444	0.0852449
1198.01	-0.0591248	-0.0717885	-0.081333	0.0863957
1198.34	-0.0609611	-0.0727959	-0.0853388	0.0823272
1198.68	-0.0584618	-0.0728446	-0.0857275	0.0861167
1199.01	-0.0602202	-0.0728731	-0.0860563	0.0813972
1199.34	-0.0600039	-0.0720641	-0.0859666	0.0844079
1199.67	-0.0595697	-0.0713964	-0.0767592	0.0927542
1200	-0.0605091	-0.0719607	-0.0844121	0.0861283

## Sheet: Figure 2G
	▵F/F0
Time(s)	C1	C2	C3	C4
0.184049	-0.0464405	-0.0091179	-0.0167267	-0.0444882
0.368098	-0.0108336	-0.022653	-0.0509204	-0.0414051
0.552147	-0.0386215	0.00917936	-0.0258868	-0.037981
0.736196	-0.0255167	0.050498	-0.0130801	-0.0264387
0.920245	-0.0154099	-0.0027356	0.00072284	-0.0681105
1.10429	-0.0331034	-0.025384	-0.0210729	-0.0293924
1.28834	-0.0224287	-0.0136913	-0.0048163	-0.0271397
1.47239	-0.0238161	-0.0006625	-0.0103038	-0.0896537
1.65644	-0.0411756	-0.0035388	-0.0028755	-0.0299026
1.84049	-0.0103756	0.0131081	-0.0510302	-0.0820138
2.02454	-0.0122115	-0.0103158	-0.0257064	-0.0589104
2.20859	-0.0104881	0.00839244	-0.0248902	-0.0855929
2.39264	-0.0020593	-0.0005131	-0.0397964	-0.089681
2.57669	-0.0555989	-0.0155573	-0.0365162	-0.0424288
2.76074	-0.0287101	-0.0281159	-0.0384078	-0.0083452
2.94479	-0.0403639	-0.0183487	-0.0229065	-0.0452963
3.12883	-0.0231374	0.00494266	-0.0231511	-0.0472122
3.31288	-0.0122746	0.0251404	0.0180471	-0.0456197
3.49693	-0.0226215	0.00348174	-0.0253353	-0.0774455
3.68098	-0.0107349	-0.0012424	0.0154558	-0.0839246
3.86503	-0.0167228	-0.0184636	-0.0459099	-0.0553532
4.04908	-0.028595	0.00879628	-0.0175159	-0.0293391
4.23313	-0.036977	0.0107239	0.0232464	-0.034768
4.41718	0.00751801	-0.0093786	-0.0082495	-0.0004824
4.60123	0.0082233	-0.0128878	0.011303	-0.0391446
4.78528	-0.0113112	-0.0281805	-0.002734	-0.0284702
4.96933	-0.0173197	-0.0290673	0.0148194	-0.0747389
5.15337	-0.0167183	0.00634671	-0.0220851	-0.0524561
5.33742	0.011034	-0.0255305	0.0259818	-0.0315307
5.52147	-0.0246661	-0.0170386	0.0206791	-0.021362
5.70552	-0.0112929	0.014239	0.00293551	-0.0284466
5.88957	-0.0133737	0.00897815	-0.0230076	-0.0376456
6.07362	-0.0114206	-0.0114302	-0.0162906	-0.0170465
6.25767	-0.0133924	0.0372776	-0.0337165	-0.0528493
6.44172	-0.0169368	0.0145156	-0.0024741	-0.0426192
6.62577	-0.0090652	0.0232035	-0.0445581	-0.0168889
6.80982	0.0163115	0.0024063	-0.0403164	-0.0583109
6.99387	-0.0249833	0.018977	-0.0161612	-0.0367713
7.17791	-0.0037953	0.00451204	-1.027e-05	-0.0362699
7.36196	-0.0176005	-0.0007462	0.00458728	-0.0472732
7.54601	0.0120692	-0.0177169	0.0217699	-0.000193
7.73006	-0.009246	-0.0246985	0.0063959	-0.036278
7.91411	-0.0142843	-0.0175018	-0.0281263	-0.0467755
8.09816	0.0177778	-0.0209025	0.0133554	-0.0305716
8.28221	-0.0038243	-0.0052002	-0.0121047	-0.0467886
8.46626	0.0331175	-0.0184603	-0.0110933	-0.0148711
8.65031	-0.0065497	0.025142	-0.0097414	-0.0506779
8.83436	0.00212873	-0.0302435	-0.0170453	-0.0712487
9.0184	0.0120809	0.00763023	0.0269742	0.0177122
9.20245	0.00029475	-0.0086295	-0.0390539	-0.0089291
9.3865	-0.0073261	-0.0064464	-0.0182252	-0.0005424
9.57055	-0.0403874	-0.0136286	-0.0201838	0.00527156
9.7546	0.00569099	0.0168181	0.00670093	-0.0236289
9.93865	-0.0110282	0.00366559	0.0117758	-0.0102138
10.1227	0.0326265	0.0303543	-0.0107142	0.0202735
10.3067	-0.0222248	0.018231	0.0305258	-0.0330199
10.4908	0.00164262	0.0212161	0.0262456	-0.0100757
10.6748	0.0279877	-0.0279153	-0.0031146	0.00161918
10.8589	0.018423	-0.0107657	0.0151299	0.0347765
11.0429	0.0132915	-0.0569899	-0.0030035	0.00681047
11.227	0.0184984	-0.025272	-0.0041795	-0.0198805
11.411	-0.010096	-0.0271769	-0.0021683	0.0251469
11.5951	0.0260954	-0.0054953	-0.0077801	0.0519365
11.7791	0.0354002	-0.0180467	-0.0055428	-0.0073987
11.9632	0.0484253	-0.0164102	0.0261106	0.0114496
12.1472	0.014566	0.0126969	0.00419277	0.0214712
12.3313	0.00947269	0.0258057	0.00045419	0.00258998
12.5153	-0.0148162	0.0182433	0.00992296	0.0257229
12.6994	0.0421253	0.00239051	0.0317405	0.0383519
12.8834	0.0415564	-0.0058909	-0.0029319	-0.0162355
13.0675	-0.015256	-0.0138005	-0.006438	0.064548
13.2515	-0.0048393	-0.0006738	-0.0162687	0.0377341
13.4356	0.0239491	-0.0023945	0.0275873	0.029461
13.6196	0.00588209	-0.0068662	0.0237061	0.0414928
13.8037	0.0335387	0.00775473	0.0125766	0.00952755
13.9877	0.0289266	-0.0049181	0.0125708	0.058312
14.1718	-0.0056143	-0.0109742	-0.0053591	0.0248041
14.3558	0.0180965	0.051978	0.0118716	0.053509
14.5399	0.0210811	-0.0111104	0.00124111	0.02105
14.7239	0.0159932	0.0102733	0.0364449	0.0556654
14.908	-0.0073849	0.00913638	0.0139285	0.050522
15.092	0.00829048	0.0514075	0.036876	0.0462368
15.2761	0.0393213	0.0145139	-0.007209	0.0376136
15.4601	0.0041084	-0.0003053	0.0368826	0.0357634
15.6442	0.0188508	-0.0274667	-0.0143298	0.0476185
15.8282	-0.0060984	-0.0253059	-0.0060412	0.062307
16.0123	0.0360536	-0.0191583	0.0119681	0.0639235
16.1963	0.0287116	0.00694945	0.0272995	0.0179165
16.3804	0.0338441	0.0292499	0.0579547	0.0587141
16.5644	0.0156448	-0.0035355	0.002777	0.0382279
16.7485	-0.0043724	0.0131085	0.0298968	0.0155691
16.9325	-0.005775	0.0115169	0.00881816	0.0600149
17.1166	-0.0044567	0.00526177	-0.0045511	0.0411206
17.3006	-0.0156579	0.00170179	0.0233555	0.0517397
17.4847	0.0131058	0.0303839	0.00396991	0.039459
17.6687	0.00997114	0.023795	0.00374783	0.0775064
17.8528	0.0200007	0.00037024	0.0142597	0.0668164
18.0368	0.0133885	0.00962983	0.0232129	0.0953024
18.2209	7.5839e-05	0.00833473	0.0306396	0.0477107
18.4049	0.0197416	0.0244966	0.0226798	0.0681074
18.589	0.0147701	0.0507769	0.0147991	0.0669126
18.773	0.00097433	-0.0185042	-0.0111315	0.0526686
18.9571	0.0256975	0.0203913	0.0209489	0.0615411
19.1411	0.0386803	-0.0269312	0.0120926	0.0709378
19.3252	0.00310043	-0.0151213	-0.0004079	0.0451204
19.5092	0.0303506	0.0104222	0.0116853	0.049855
19.6933	-0.0229222	0.015769	0.047628	0.0652863
19.8773	0.026724	0.027842	-0.0069399	0.0597978
20.0613	-0.012978	-0.0329198	0.0296458	0.0765322
20.2454	0.057524	0.0170456	0.0485833	0.0577429
20.4294	0.00532532	0.00756128	0.0263036	0.0543252
20.6135	0.0011159	0.0186173	0.0108583	0.0517676
20.7975	0.0098211	0.0304668	0.0145775	0.0755051
20.9816	0.00937737	0.020232	0.0336368	0.0550527
21.1656	0.0286434	-0.0066824	0.032569	0.0669808
21.3497	-0.0005368	-0.0029925	0.00828719	0.0810715
21.5337	0.00178143	-0.004821	0.0225801	0.0719649
21.7178	-0.0111091	-0.0259908	0.166517	0.0543751
21.9018	0.0023315	0.0403799	0.138006	0.0598467
22.0859	0.0213238	-0.0134433	0.175881	0.0811787
22.2699	-0.0038793	-0.0175838	0.14862	0.0633724
22.454	0.0024118	0.0344998	0.152752	0.109826
22.638	-0.0084124	0.0375719	0.201074	0.0958146
22.8221	0.0241396	0.0372514	0.191176	0.0745232
23.0061	0.0242367	0.0391331	0.166393	0.117115
23.1902	0.00637922	0.00537097	0.1519	0.0640021
23.3742	0.0282509	0.0324049	0.169562	0.0798451
23.5583	0.0405163	0.0160199	0.148012	0.100782
23.7423	0.0046342	0.0420502	0.129989	0.0490936
23.9264	-4.992e-05	-0.0102953	0.106695	0.0789912
24.1104	-0.0169492	0.0289252	0.129591	0.0771743
24.2945	0.00623031	-0.0037886	0.134331	0.0730254
24.4785	0.0017338	0.00110029	0.139032	0.0594344
24.6626	-0.0053781	-0.0048711	0.17645	0.0603481
24.8466	-0.0075728	-0.0132662	0.179546	0.0672653
25.0307	0.00873001	0.0146664	0.153861	0.0534919
25.2147	0.0394153	0.0167434	0.162687	0.110199
25.3988	0.0106977	-0.0080105	0.172198	0.100132
25.5828	0.0153698	-0.0079282	0.133944	0.0770857
25.7669	-0.0010381	0.0041163	0.157835	0.096325
25.9509	0.00275595	-0.0032411	0.152976	0.0766599
26.135	0.030755	0.00495052	0.198259	0.120493
26.319	0.0238748	0.0163352	0.127825	0.0996604
26.5031	-0.0178503	0.00773497	0.163572	0.0935367
26.6871	-0.0003412	0.00358714	0.135541	0.100299
26.8712	0.00600063	0.0149213	0.17439	0.0841128
27.0552	-0.0052788	0.00211481	0.150448	0.0845108
27.2393	-0.0209418	-0.026419	0.155457	0.0777888
27.4233	0.0463774	0.022702	0.183128	0.164569
27.6074	0.225642	0.066175	0.210631	0.291448
27.7914	0.194676	0.110187	0.264864	0.238352
27.9755	0.14823	0.0907114	0.218491	0.193771
28.1595	0.17691	0.0698555	0.25322	0.243908
28.3436	0.175616	0.0634743	0.215158	0.237353
28.5276	0.124526	0.106756	0.240662	0.219468
28.7117	0.172422	0.0689493	0.263427	0.215509
28.8957	0.155457	0.0952457	0.235558	0.24975
29.0798	0.148549	0.0803833	0.250295	0.202317
29.2638	0.14091	0.122477	0.232472	0.188994
29.4479	0.197199	0.0785339	0.258462	0.260231
29.6319	0.132127	0.103844	0.220117	0.231475
29.816	0.127818	0.0804702	0.261823	0.231139
30	0.14342	0.0704006	0.240256	0.248262
30.184	0.148292	0.0902626	0.220697	0.261075
30.3681	0.139834	0.0558552	0.277256	0.264403
30.5521	0.157799	0.0857058	0.222544	0.268863
30.7362	0.134793	0.064807	0.243036	0.245769
30.9202	0.18275	0.105361	0.250446	0.268634
31.1043	0.165379	0.0766112	0.245036	0.247775
31.2883	0.146398	0.080311	0.2484	0.261515
31.4724	0.168051	0.0977459	0.230857	0.283761
31.6564	0.159606	0.0906222	0.27491	0.286202
31.8405	0.168441	0.110375	0.266249	0.266375
32.0245	0.151335	0.0560976	0.231201	0.270615
32.2086	0.131838	0.0770926	0.243316	0.266883
32.3926	0.148195	0.0936586	0.281362	0.227157
32.5767	0.180558	0.0945076	0.257668	0.286398
32.7607	0.161875	0.0581216	0.259374	0.270345
32.9448	0.173148	0.103817	0.214139	0.28295
33.1288	0.152227	0.0860735	0.263327	0.307732
33.3129	0.150963	0.129516	0.268662	0.274472
33.4969	0.166359	0.0655316	0.244734	0.274162
33.681	0.153602	0.0772502	0.282084	0.259093
33.865	0.148491	0.0910405	0.253438	0.261332
34.0491	0.116144	0.0983048	0.252719	0.288311
34.2331	0.162746	0.0900054	0.25483	0.309241
34.4172	0.155493	0.128364	0.233917	0.256482
34.6012	0.142008	0.0930748	0.274442	0.292155
34.7853	0.193235	0.130536	0.277488	0.256546
34.9693	0.15037	0.0821494	0.272289	0.329181
35.1534	0.153375	0.0961393	0.275423	0.30235
35.3374	0.183528	0.13836	0.274812	0.281026
35.5215	0.153399	0.0752362	0.243537	0.288829
35.7055	0.164298	0.113775	0.253625	0.30366
35.8896	0.145478	0.105715	0.296865	0.314716
36.0736	0.142259	0.100076	0.298842	0.265012
36.2577	0.150173	0.0963264	0.300932	0.313385
36.4417	0.174159	0.114415	0.264564	0.291848
36.6258	0.165434	0.121012	0.28052	0.317057
36.8098	0.131836	0.0980241	0.24255	0.26941
36.9939	0.154093	0.0991557	0.284912	0.300027
37.1779	0.157958	0.0917115	0.262571	0.357074
37.362	0.127239	0.113693	0.255692	0.324899
37.546	0.151701	0.0915672	0.259697	0.307593
37.7301	0.125653	0.138258	0.306484	0.381035
37.9141	0.172296	0.0953547	0.249853	0.35919
38.0982	0.100236	0.106053	0.281126	0.349579
38.2822	0.148219	0.178657	0.301085	0.380428
38.4663	0.13914	0.0651832	0.28749	0.39271
38.6503	0.130761	0.0952615	0.242748	0.391622
38.8344	0.156693	0.0771	0.249278	0.37387
39.0184	0.149707	0.149069	0.28594	0.347505
39.2025	0.171634	0.100016	0.266419	0.335607
39.3865	0.189156	0.11272	0.291341	0.390401
39.5706	0.159779	0.108541	0.235799	0.389722
39.7546	0.184882	0.133205	0.267894	0.415599
39.9387	0.151898	0.107315	0.333221	0.416473
40.1227	0.193682	0.0758093	0.3016	0.417359
40.3067	0.193505	0.110211	0.282293	0.405714
40.4908	0.165025	0.121273	0.283038	0.438039
40.6748	0.183126	0.110612	0.288807	0.421556
40.8589	0.191583	0.113557	0.247932	0.416551
41.0429	0.228954	0.120193	0.283906	0.400395
41.227	0.189478	0.120922	0.275983	0.4015
41.411	0.190513	0.126383	0.239568	0.427975
41.5951	0.188769	0.126998	0.265658	0.376269
41.7791	0.182084	0.126998	0.2649	0.376998
41.9632	0.238902	0.129656	0.291549	0.397694
42.1472	0.231258	0.134083	0.277457	0.404509
42.3313	0.189725	0.134923	0.267501	0.371945
42.5153	0.21643	0.140918	0.278473	0.414205
42.6994	0.190129	0.146704	0.29403	0.401173
42.8834	0.211216	0.148732	0.286131	0.381524
43.0675	0.196734	0.149256	0.305513	0.390006
43.2515	0.210923	0.155057	0.303605	0.351787
43.4356	0.211402	0.155061	0.261067	0.378063
43.6196	0.208872	0.156215	0.276088	0.364217
43.8037	0.21422	0.174516	0.288089	0.427754
43.9877	0.175869	0.177303	0.252688	0.388929
44.1718	0.192147	0.17304	0.231251	0.352535
44.3558	0.221844	0.185644	0.274113	0.343086
44.5399	0.235007	0.196002	0.27702	0.400559
44.7239	0.214865	0.206604	0.285108	0.437236
44.908	0.234089	0.210042	0.282182	0.384621
45.092	0.241762	0.215815	0.31141	0.407284
45.2761	0.263476	0.217087	0.290088	0.363799
45.4601	0.197478	0.22068	0.293723	0.397195
45.6442	0.193034	0.226094	0.293244	0.39446
45.8282	0.240931	0.228714	0.273547	0.392472
46.0123	0.229004	0.238458	0.248293	0.428544
46.1963	0.221409	0.242793	0.309126	0.451928
46.3804	0.205143	0.248771	0.291915	0.475832
46.5644	0.219712	0.250785	0.31228	0.449878
46.7485	0.202465	0.251076	0.287776	0.456838
46.9325	0.224943	0.254623	0.332281	0.448972
47.1166	0.23778	0.255504	0.299937	0.470327
47.3006	0.237439	0.256448	0.285975	0.467538
47.4847	0.21695	0.259005	0.284439	0.451263
47.6687	0.241345	0.264931	0.305988	0.418759
47.8528	0.225507	0.290324	0.285754	0.476491
48.0368	0.252136	0.29038	0.30369	0.493021
48.2209	0.245368	0.298385	0.329398	0.475016
48.4049	0.215833	0.299949	0.288311	0.481325
48.589	0.238709	0.303583	0.340472	0.482519
48.773	0.226995	0.30483	0.321509	0.470016
48.9571	0.19604	0.30768	0.288184	0.505931
49.1411	0.246005	0.307753	0.293453	0.495001
49.3252	0.236437	0.30801	0.296352	0.484878
49.5092	0.218449	0.308746	0.30016	0.447642
49.6933	0.261011	0.309081	0.37474	0.451334
49.8773	0.241443	0.310591	0.320167	0.463187
50.0613	0.229246	0.311568	0.286152	0.44046
50.2454	0.240332	0.311698	0.292874	0.462872
50.4294	0.264436	0.313319	0.288509	0.486439
50.6135	0.233465	0.314626	0.279706	0.491922
50.7975	0.247937	0.320178	0.303172	0.493672
50.9816	0.267207	0.321361	0.298597	0.483559
51.1656	0.237172	0.323511	0.326688	0.540658
51.3497	0.214499	0.325859	0.306197	0.479001
51.5337	0.264336	0.327406	0.283356	0.491002
51.7178	0.280127	0.331641	0.300578	0.50271
51.9018	0.193554	0.333107	0.280218	0.514033
52.0859	0.236611	0.333905	0.318782	0.537446
52.2699	0.208512	0.337332	0.325685	0.537845
52.454	0.254596	0.337461	0.335896	0.526618
52.638	0.267139	0.338817	0.289166	0.527153
52.8221	0.243147	0.339224	0.32723	0.516724
53.0061	0.239199	0.341252	0.317867	0.530399
53.1902	0.228827	0.344607	0.290701	0.534752
53.3742	0.22672	0.347814	0.311864	0.503417
53.5583	0.224597	0.348709	0.3322	0.524412
53.7423	0.241143	0.349383	0.35069	0.509069
53.9264	0.239087	0.35477	0.331528	0.555783
54.1104	0.235882	0.356203	0.299909	0.53824
54.2945	0.255658	0.35924	0.311551	0.524008
54.4785	0.231604	0.362861	0.276326	0.56129
54.6626	0.249084	0.3647	0.307338	0.496434
54.8466	0.234999	0.367183	0.354532	0.573792
55.0307	0.218885	0.370728	0.338786	0.534917
55.2147	0.224061	0.354114	0.289155	0.535452
55.3988	0.253636	0.355514	0.289887	0.565955
55.5828	0.231179	0.357206	0.333989	0.562852
55.7669	0.25245	0.363238	0.289379	0.634384
55.9509	0.273428	0.365866	0.312377	0.559501
56.135	0.200961	0.375673	0.288017	0.621026
56.319	0.2391	0.378387	0.296082	0.585214
56.5031	0.259874	0.381029	0.308326	0.599342
56.6871	0.246661	0.394088	0.269837	0.649386
56.8712	0.275326	0.39936	0.307835	0.581413
57.0552	0.219757	0.409289	0.325639	0.641336
57.2393	0.248713	0.4111	0.278315	0.675141
57.4233	0.230579	0.419501	0.292095	0.705364
57.6074	0.268416	0.442829	0.30229	0.658699
57.7914	0.253395	0.412527	0.305313	0.634628
57.9755	0.237264	0.44519	0.286016	0.647571
58.1595	0.281122	0.451142	0.308062	0.645292
58.3436	0.279694	0.464549	0.292019	0.68377
58.5276	0.276309	0.472802	0.314917	0.644188
58.7117	0.231797	0.473465	0.337679	0.646731
58.8957	0.25962	0.475431	0.318762	0.673496
59.0798	0.248672	0.477442	0.256653	0.690345
59.2638	0.219678	0.487977	0.281887	0.703765
59.4479	0.272696	0.488136	0.323184	0.694993
59.6319	0.285324	0.490098	0.278116	0.700928
59.816	0.236948	0.49214	0.287214	0.718561
60	0.21673	0.494107	0.300064	0.726722
60.184	0.255027	0.494739	0.25695	0.636484
60.3681	0.229505	0.495711	0.317273	0.734619
60.5521	0.269617	0.498016	0.258764	0.740369
60.7362	0.253853	0.498922	0.283196	0.731516
60.9202	0.270566	0.502089	0.307618	0.69175
61.1043	0.260679	0.502753	0.280887	0.736373
61.2883	0.267379	0.505669	0.305586	0.737414
61.4724	0.236381	0.510464	0.29687	0.72511
61.6564	0.250109	0.514127	0.283925	0.761835
61.8405	0.221181	0.514516	0.328056	0.750272
62.0245	0.231691	0.5149	0.311394	0.766876
62.2086	0.225946	0.516677	0.27627	0.750425
62.3926	0.236733	0.521541	0.341996	0.760446
62.5767	0.239328	0.529622	0.283265	0.796833
62.7607	0.277613	0.531042	0.290709	0.78956
62.9448	0.257764	0.534445	0.307385	0.758697
63.1288	0.26145	0.535233	0.254337	0.783379
63.3129	0.21796	0.541762	0.302885	0.775238
63.4969	0.234573	0.524498	0.264225	0.767795
63.681	0.251857	0.541566	0.303583	0.714804
63.865	0.258158	0.554157	0.271416	0.756969
64.0491	0.257122	0.562477	0.28473	0.7814
64.2331	0.256357	0.567606	0.283152	0.766341
64.4172	0.238453	0.568918	0.305973	0.775279
64.6012	0.219083	0.56989	0.397738	0.772926
64.7853	0.231997	0.573578	0.378231	0.749478
64.9693	0.255462	0.587354	0.435535	0.777901
65.1534	0.240078	0.589012	0.376587	0.762351
65.3374	0.226569	0.589884	0.425261	0.811643
65.5215	0.233258	0.59849	0.391369	0.822311
65.7055	0.246272	0.601871	0.393879	0.770708
65.8896	0.216777	0.611052	0.373657	0.805868
66.0736	0.268179	0.61189	0.373197	0.739545
66.2577	0.253074	0.624098	0.405423	0.78455
66.4417	0.280931	0.631846	0.43175	0.809384
66.6258	0.260618	0.648302	0.382017	0.772211
66.8098	0.232394	0.604107	0.362579	0.781553
66.9939	0.247749	0.631068	0.360493	0.762458
67.1779	0.235059	0.638441	0.392353	0.811368
67.362	0.284467	0.644981	0.379787	0.809327
67.546	0.258104	0.646834	0.390166	0.756374
67.7301	0.270795	0.652545	0.395084	0.809179
67.9141	0.254916	0.656363	0.426008	0.750544
68.0982	0.26665	0.65835	0.428906	0.815054
68.2822	0.240466	0.65867	0.363396	0.798602
68.4663	0.266588	0.65936	0.433764	0.854594
68.6503	0.253314	0.65954	0.395642	0.808575
68.8344	0.262446	0.660422	0.399806	0.809165
69.0184	0.236346	0.664856	0.399292	0.838374
69.2025	0.246248	0.66516	0.426936	0.854826
69.3865	0.222313	0.666586	0.426458	0.829142
69.5706	0.27322	0.670088	0.414896	0.802267
69.7546	0.327619	0.671974	0.410486	0.818372
69.9387	0.274265	0.672164	0.397931	0.821583
70.1227	0.269226	0.674487	0.397963	0.813671
70.3067	0.30302	0.676053	0.410507	0.810806
70.4908	0.251028	0.680387	0.382738	0.807398
70.6748	0.26875	0.681784	0.412683	0.803082
70.8589	0.279494	0.687637	0.39406	0.825496
71.0429	0.251193	0.690353	0.43039	0.828556
71.227	0.286845	0.705412	0.397796	0.841844
71.411	0.293371	0.708983	0.41009	0.833805
71.5951	0.289548	0.713582	0.412192	0.841896
71.7791	0.287078	0.715778	0.422705	0.817472
71.9632	0.31645	0.713549	0.428627	0.874356
72.1472	0.344292	0.712328	0.396828	0.855156
72.3313	0.292011	0.711483	0.409202	0.874498
72.5153	0.294274	0.710112	0.426408	0.887633
72.6994	0.348554	0.709698	0.455392	0.87459
72.8834	0.322439	0.709363	0.422384	0.849981
73.0675	0.31001	0.707353	0.400225	0.828998
73.2515	0.305437	0.706399	0.417264	0.89434
73.4356	0.354134	0.701892	0.429253	0.861725
73.6196	0.37688	0.701094	0.429725	0.838068
73.8037	0.354275	0.698039	0.444721	0.907499
73.9877	0.331822	0.697821	0.41034	0.868255
74.1718	0.329997	0.697298	0.408086	0.850227
74.3558	0.357342	0.69626	0.428995	0.893947
74.5399	0.353003	0.695173	0.442478	0.893821
74.7239	0.331943	0.693352	0.453437	0.900647
74.908	0.335045	0.693314	0.428563	0.868137
75.092	0.327454	0.693288	0.450431	0.888234
75.2761	0.30844	0.68728	0.44845	1.13455
75.4601	0.365977	0.686561	0.455639	1.08252
75.6442	0.339418	0.686341	0.464138	1.07577
75.8282	0.342876	0.686137	0.438799	1.10198
76.0123	0.322607	0.684503	0.460914	1.07611
76.1963	0.348845	0.684487	0.469022	1.08245
76.3804	0.365364	0.692748	0.477175	1.10204
76.5644	0.332627	0.69273	0.440008	1.05643
76.7485	0.35534	0.692461	0.453368	1.04983
76.9325	0.404016	0.691884	0.492907	1.08903
77.1166	0.364416	0.691223	0.443	1.10243
77.3006	0.335455	0.691194	0.457043	1.05002
77.4847	0.369058	0.684388	0.478644	1.05625
77.6687	0.367948	0.683907	0.494102	1.0825
77.8528	0.356368	0.683886	0.479654	1.0757
78.0368	0.357339	0.683077	0.477752	1.09549
78.2209	0.381094	0.683048	0.468432	1.08266
78.4049	0.339255	0.682854	0.427541	1.06968
78.589	0.378435	0.691183	0.478808	1.08897
78.773	0.355096	0.68829	0.475261	1.13465
78.9571	0.372422	0.687988	0.463648	1.07591
79.1411	0.38218	0.687458	0.508785	1.04313
79.3252	0.373593	0.681899	0.458208	1.01038
79.5092	0.334036	0.681701	0.470831	1.04972
79.6933	0.383627	0.680654	0.480432	1.08855
79.8773	0.373267	0.680506	0.45026	1.06278
80.0613	0.373553	0.68028	0.479699	1.03654
80.2454	0.38352	0.679561	0.478695	1.0433
80.4294	0.352457	0.679278	0.511894	1.0235
80.6135	0.378588	0.678796	0.450112	1.02339
80.7975	0.342875	0.678643	0.470396	1.06257
80.9816	0.380665	0.678317	0.500506	0.990506
81.1656	0.401831	0.678024	0.486604	0.984173
81.3497	0.34921	0.67729	0.484733	1.04322
81.5337	0.336702	0.677174	0.523084	1.03656
81.7178	0.378698	0.674851	0.535762	1.05645
81.9018	0.376487	0.674605	0.526304	1.04345
82.0859	0.401449	0.674478	0.552388	1.04323
82.2699	0.369826	0.673796	0.504833	1.04984
82.454	0.380364	0.67624	0.519702	1.0631
82.638	0.429636	0.676217	0.502792	1.04327
82.8221	0.388713	0.675548	0.541051	1.06271
83.0061	0.414111	0.675473	0.470289	1.02396
83.1902	0.396902	0.675467	0.569199	1.04325
83.3742	0.362378	0.677129	0.530425	1.09549
83.5583	0.367478	0.676751	0.54088	1.11491
83.7423	0.383803	0.676285	0.515639	1.06968
83.9264	0.408778	0.673292	0.552455	1.07584
84.1104	0.399399	0.673227	0.512163	1.09556
84.2945	0.399161	0.673101	0.534327	1.10246
84.4785	0.387518	0.672984	0.549338	1.10847
84.6626	0.434531	0.672488	0.53014	1.1087
84.8466	0.420892	0.671541	0.5413	1.10854
85.0307	0.474856	0.671446	0.552249	1.10162
85.2147	0.439629	0.669325	0.547308	1.16751
85.3988	0.403893	0.66902	0.478463	1.19392
85.5828	0.444886	0.668812	0.525266	1.10854
85.7669	0.464691	0.668606	0.541492	1.16063
85.9509	0.484988	0.668422	0.55298	1.16772
86.135	0.424532	0.671177	0.53173	1.18684
86.319	0.470052	0.671028	0.494112	1.14124
86.5031	0.419357	0.670679	0.559905	1.16092
86.6871	0.449837	0.669557	0.543594	1.12192
86.8712	0.459658	0.66832	0.552604	1.16746
87.0552	0.44446	0.668123	0.541872	1.12837
87.2393	0.44478	0.667983	0.557898	1.14806
87.4233	0.459661	0.66692	0.563706	1.1871
87.6074	0.434625	0.666588	0.508012	1.20016
87.7914	0.485241	0.666528	0.569226	1.20701
87.9755	0.46488	0.6662	0.569316	1.20024
88.1595	0.490055	0.665681	0.541055	1.17421
88.3436	0.485078	0.665039	0.574832	1.22647
88.5276	0.480029	0.664804	0.507223	1.21314
88.7117	0.484719	0.66149	0.543427	1.24604
88.8957	0.444457	0.658763	0.558056	1.2068
89.0798	0.479918	0.658222	0.530276	1.18079
89.2638	0.515007	0.657956	0.52288	1.25932
89.4479	0.455042	0.656977	0.530412	1.27239
89.6319	0.525103	0.656511	0.534067	1.27906
89.816	0.515142	0.65574	0.530229	1.20025
90	0.505048	0.654701	0.543619	1.187
90.184	0.484936	0.664623	0.56497	1.18751
90.3681	0.470003	0.664442	0.556405	1.27207
90.5521	0.494886	0.664035	0.535825	1.20054
90.7362	0.525564	0.663979	0.519094	1.26568
90.9202	0.540726	0.663242	0.519489	1.22657
91.1043	0.499964	0.662545	0.563347	1.25263
91.2883	0.510109	0.661578	0.567296	1.23273
91.4724	0.540272	0.654621	0.580195	1.2592
91.6564	0.571138	0.654502	0.584286	1.16132
91.8405	0.530434	0.654061	0.571815	1.18686
92.0245	0.520373	0.653203	0.577258	1.20711
92.2086	0.51032	0.653146	0.577214	1.12852
92.3926	0.555764	0.653115	0.577162	1.22604
92.5767	0.580943	0.652827	0.577149	1.19375
92.7607	0.535368	0.651803	0.577057	1.20063
92.9448	0.560929	0.646751	0.577052	1.2658
93.1288	0.601255	0.646479	0.576994	1.17391
93.3129	0.621435	0.645839	0.576943	1.22608
93.4969	0.555649	0.644915	0.576932	1.1935
93.681	0.580709	0.640601	0.576868	1.15462
93.865	0.540823	0.640349	0.576848	1.17399
94.0491	0.560621	0.639474	0.576776	1.17416
94.2331	0.560775	0.639051	0.576766	1.18745
94.4172	0.565746	0.651601	0.576754	1.19359
94.6012	0.6064	0.651373	0.576715	1.1744
94.7853	0.631571	0.651112	0.576699	1.2198
94.9693	0.581366	0.651062	0.576574	1.13486
95.1534	0.58634	0.649294	0.576443	1.15419
95.3374	0.570775	0.649266	0.576397	1.14129
95.5215	0.56569	0.64479	0.576258	1.15447
95.7055	0.601302	0.643903	0.576184	1.1478
95.8896	0.560802	0.643813	0.576167	1.18701
96.0736	0.576022	0.643159	0.576144	1.10838
96.2577	0.601336	0.640876	0.576099	1.14804
96.4417	0.621171	0.636716	0.576001	1.11511
96.6258	0.631735	0.636661	0.575869	1.14123
96.8098	0.581154	0.636576	0.575844	1.14827
96.9939	0.626747	0.636557	0.57581	1.18096
97.1779	0.661688	0.636113	0.575705	1.13474
97.362	0.662247	0.632258	0.575649	1.14144
97.546	0.667238	0.631309	0.575594	1.141
97.7301	0.686783	0.630257	0.57526	1.16111
97.9141	0.666695	0.629661	0.575247	1.12193
98.0982	0.68683	0.63898	0.574882	1.11551
98.2822	0.626586	0.638672	0.574851	1.08267
98.4663	0.667396	0.638189	0.574824	1.16767
98.6503	0.646863	0.637735	0.574729	1.15446
98.8344	0.696973	0.637349	0.574673	1.19335
99.0184	0.676895	0.628553	0.574468	1.10862
99.2025	0.717089	0.628157	0.574451	1.17381
99.3865	0.702075	0.627175	0.573935	1.1086
99.5706	0.661636	0.625994	0.57377	1.14756
99.7546	0.70194	0.63569	0.573656	1.13455
99.9387	0.67708	0.635069	0.573621	1.14783
100.123	0.676882	0.634207	0.573405	1.12168
100.307	0.692426	0.633304	0.57318	1.10845
100.491	0.707575	0.63249	0.572686	1.12853
100.675	0.692003	0.63229	0.572587	1.07617
100.859	0.722552	0.629656	0.572551	1.12789
101.043	0.74252	0.629067	0.57251	1.19345
101.227	0.732468	0.625641	0.57234	1.12164
101.411	0.72242	0.625117	0.572229	1.10904
101.595	0.707041	0.625057	0.57195	1.11523
101.779	0.712259	0.624855	0.571917	1.09579
101.963	0.752843	0.623587	0.571856	1.10893
102.147	0.71225	0.623486	0.57183	1.06956
102.331	0.717402	0.623229	0.571785	1.10182
102.515	0.742646	0.622764	0.571755	1.02963
102.699	0.737638	0.62028	0.571755	1.06938
102.883	0.752611	0.618646	0.571673	1.06329
103.067	0.752905	0.617938	0.57166	1.06322
103.252	0.737384	0.617574	0.571634	1.04343
103.436	0.778245	0.616315	0.57162	1.03682
103.62	0.763225	0.615403	0.571594	1.09548
103.804	0.757847	0.614633	0.571579	1.06243
103.988	0.762957	0.61313	0.571548	1.08256
104.172	0.833955	0.611913	0.571536	1.03024
104.356	0.798679	0.610978	0.571512	1.0695
104.54	0.767576	0.610673	0.57151	1.08279
104.724	0.737777	0.625249	0.571505	1.05645
104.908	0.787943	0.625146	0.571392	1.08923
105.092	0.717095	0.624695	0.571349	1.10228
105.276	0.783388	0.624543	0.571296	1.08254
105.46	0.793029	0.6241	0.571258	1.05613
105.644	0.783406	0.623741	0.571248	1.10229
105.828	0.752815	0.622725	0.571188	1.16133
106.012	0.788457	0.618761	0.571169	1.08891
106.196	0.768052	0.618002	0.571149	1.04309
106.38	0.793396	0.617275	0.571111	1.14814
106.564	0.762703	0.61656	0.570977	1.09567
106.748	0.778092	0.616362	0.570945	1.14758
106.933	0.79325	0.616041	0.570943	1.10883
107.117	0.803502	0.615335	0.5705	1.13515
107.301	0.752855	0.609343	0.570255	1.06947
107.485	0.773227	0.608114	0.570106	1.07598
107.669	0.778303	0.607862	0.570093	1.0371
107.853	0.752758	0.606192	0.569839	1.09555
108.037	0.793205	0.606001	0.569692	1.09597
108.221	0.792967	0.605345	0.569557	1.08884
108.405	0.742218	0.604445	0.569396	1.06954
108.589	0.741657	0.60307	0.569309	1.09594
108.773	0.752205	0.602498	0.569131	1.06969
108.957	0.782513	0.600301	0.568994	1.10857
109.141	0.746967	0.604659	0.568982	1.06942
109.325	0.823046	0.607519	0.568823	1.11542
109.509	0.767669	0.607472	0.568803	1.14099
109.693	0.787269	0.60154	0.568777	1.10185
109.877	0.802853	0.600541	0.56874	1.04945
110.061	0.782305	0.598756	0.568533	1.08903
110.245	0.726711	0.592547	0.568054	1.08904
110.429	0.797917	0.600051	0.567826	1.11482
110.613	0.797486	0.596393	0.567766	1.06318
110.798	0.742426	0.60048	0.567299	1.04962
110.982	0.777689	0.609845	0.566828	1.03006
111.166	0.732103	0.608964	0.566787	1.05662
111.35	0.822916	0.608431	0.566574	1.05631
111.534	0.721604	0.608355	0.566524	1.09548
111.718	0.782835	0.607927	0.566519	1.07604
111.902	0.792905	0.606681	0.566442	1.05636
112.086	0.761915	0.604597	0.566349	1.04359
112.27	0.817815	0.604576	0.566293	1.04347
112.454	0.813181	0.604306	0.565927	1.02346
112.638	0.797295	0.603685	0.56586	1.08836
112.822	0.822901	0.602827	0.565727	1.08882
113.006	0.83309	0.602473	0.565663	1.1083
113.19	0.803031	0.610599	0.565636	1.08248
113.374	0.807923	0.610274	0.565586	1.14762
113.558	0.838121	0.609816	0.565493	1.15378
113.742	0.842806	0.607212	0.565484	1.16747
113.926	0.913894	0.606562	0.565474	1.213
114.11	0.853331	0.605846	0.565443	1.108
114.294	0.873435	0.605152	0.565355	1.12732
114.479	0.832881	0.605044	0.56535	1.12085
114.663	0.89382	0.604895	0.565277	1.10823
114.847	0.878223	0.603647	0.564861	1.10171
115.031	0.868114	0.601525	0.56475	1.18632
115.215	0.858463	0.59939	0.564744	1.12735
115.399	0.868153	0.599199	0.564673	1.07524
115.583	0.863412	0.592159	0.564387	1.15389
115.767	0.873822	0.591631	0.564174	1.16735
115.951	0.863363	0.590674	0.563882	1.16074
116.135	0.832947	0.590115	0.563815	1.14728
116.319	0.904039	0.592971	0.563312	1.12824
116.503	0.843173	0.587556	0.563254	1.17351
116.687	0.848307	0.584714	0.56309	1.18607
116.871	0.878607	0.58468	0.562792	1.21953
117.055	0.928938	0.582755	0.562708	1.16037
117.239	0.90376	0.582472	0.562529	1.16701
117.423	0.918907	0.585572	0.562025	1.20563
117.607	0.883627	0.584327	0.561953	1.21948
117.791	0.898508	0.583567	0.561784	1.14747
117.975	0.903839	0.582876	0.56156	1.18691
118.16	0.832661	0.584081	0.561354	1.20031
118.344	0.898842	0.582873	0.561293	1.13415
118.528	0.904177	0.582461	0.561288	1.18025
118.712	0.914122	0.58161	0.561285	1.15412
118.896	0.873446	0.589526	0.561242	1.18676
119.08	0.87879	0.588863	0.561146	1.17997
119.264	0.903453	0.587832	0.560983	1.18038
119.448	0.949443	0.584346	0.560967	1.15454
119.632	0.979391	0.582638	0.560752	1.19321
119.816	0.934286	0.5896	0.560675	1.19327
120	0.929436	0.583744	0.560581	1.16029
120.184	0.87309	0.580398	0.560463	1.1997
120.368	0.928678	0.589278	0.560404	1.14755
120.552	0.928932	0.58725	0.560361	1.15429
120.736	0.919076	0.584631	0.560324	1.18007
120.92	0.914128	0.584046	0.56016	1.14711
121.104	0.934056	0.581159	0.560101	1.17372
121.288	0.908787	0.588099	0.560027	1.16048
121.472	0.924185	0.581468	0.55998	1.13481
121.656	0.96477	0.577989	0.559903	1.17983
121.84	0.919089	0.571225	0.559733	1.18058
122.025	0.898879	0.571697	0.559523	1.15411
122.209	0.974353	0.571477	0.559523	1.1995
122.393	0.919188	0.574686	0.559493	1.15373
122.577	0.924102	0.581435	0.559375	1.18056
122.761	0.878658	0.571636	0.559323	1.14746
122.945	0.964759	0.571564	0.55929	1.1346
123.129	0.939135	0.578198	0.559108	1.12792
123.313	0.919257	0.577787	0.559085	1.09528
123.497	0.90381	0.584513	0.559073	1.11441
123.681	0.939227	0.571341	0.559008	1.15401
123.865	0.913662	0.5718	0.5589	1.10795
124.049	0.929155	0.574926	0.558732	1.1348
124.233	0.933797	0.574838	0.558686	1.13462
124.417	0.954061	0.574684	0.558602	1.09505
124.601	0.949369	0.581448	0.55843	1.13435
124.785	0.949457	0.57503	0.558388	1.13431
124.969	0.994715	0.574742	0.558305	1.12175
125.153	0.979261	0.574494	0.558118	1.14761
125.337	0.97442	0.57423	0.558116	1.12074
125.521	0.989303	0.571281	0.557789	1.06158
125.706	0.96973	0.561005	0.557467	1.13431
125.89	1.00947	0.560965	0.557355	1.0954
126.074	1.00992	0.558	0.557234	1.12813
126.258	1.03491	0.557914	0.557125	1.12106
126.442	1.02994	0.554884	0.557122	1.07489
126.626	1.0501	0.554871	0.556909	1.06202
126.81	1.04018	0.55472	0.556907	1.14071
126.994	1.09599	0.554539	0.556859	1.04224
127.178	1.0705	0.554514	0.556717	1.0753
127.362	1.04018	0.554432	0.556413	1.08189
127.546	1.0858	0.551439	0.556276	1.06244
127.73	1.08049	0.551375	0.556264	1.04219
127.914	1.03013	0.55136	0.556157	1.08151
128.098	1.10096	0.551167	0.556063	1.04926
128.282	1.10078	0.551159	0.555892	1.07537
128.466	1.03516	0.551152	0.555487	1.05513
128.65	1.08552	0.551131	0.555334	1.06863
128.834	1.07058	0.548145	0.55494	1.05531
129.018	1.06527	0.548138	0.554884	1.09508
129.202	1.06002	0.548093	0.554678	1.11511
129.387	1.0503	0.548069	0.554663	1.04228
129.571	1.07047	0.548037	0.554651	1.0163
129.755	1.06057	0.548036	0.554551	1.03635
129.939	1.00514	0.547707	0.554501	1.07509
130.123	1.06545	0.544959	0.554486	1.09492
130.307	1.02031	0.544839	0.554437	0.931455
130.491	0.969706	0.544766	0.554055	1.03572
130.675	1.03491	0.544564	0.553875	1.04883
130.859	1.00989	0.544502	0.553868	1.00976
131.043	1.04489	0.541781	0.553508	1.01624
131.227	1.06528	0.541632	0.553386	1.05574
131.411	1.01981	0.541619	0.553167	1.02933
131.595	1.00501	0.541595	0.553154	0.989938
131.779	0.979819	0.541497	0.553038	1.01591
131.963	1.02564	0.541494	0.552241	1.0036
132.147	1.02553	0.541465	0.552212	1.01595
132.331	1.02496	0.541384	0.552202	1.00344
132.515	1.01999	0.541369	0.552071	1.02972
132.699	1.02491	0.541242	0.55194	1.00977
132.883	0.949332	0.538494	0.551868	1.003
133.067	1.03516	0.538485	0.551585	1.01639
133.252	1.05599	0.538359	0.550805	1.02933
133.436	1.01036	0.538307	0.550472	0.976607
133.62	0.989656	0.538298	0.550397	0.983803
133.804	0.969384	0.538144	0.550386	1.00987
133.988	0.974701	0.538129	0.550288	0.98388
134.172	1.00509	0.538127	0.550209	0.970831
134.356	0.979916	0.535126	0.550095	0.996767
134.54	1.02528	0.535038	0.550093	0.99021
134.724	1.01495	0.535	0.550007	0.983646
134.908	0.979834	0.534975	0.549876	0.983575
135.092	0.949602	0.534939	0.549813	0.925062
135.276	0.949446	0.534765	0.549523	0.996549
135.46	0.969349	0.534756	0.549498	0.931419
135.644	0.974811	0.531897	0.549351	0.977165
135.828	0.944263	0.531894	0.5492	0.997165
136.012	0.944705	0.531876	0.549043	0.957818
136.196	0.964201	0.531866	0.549002	1.01
136.38	0.93388	0.531861	0.548983	0.976696
136.564	0.959165	0.531849	0.54893	0.957503
136.748	0.923956	0.531826	0.548857	0.983133
136.933	0.944152	0.531794	0.548512	0.970373
137.117	0.979928	0.531742	0.548269	1.01646
137.301	0.888682	0.531717	0.548178	0.951083
137.485	0.984805	0.531655	0.548076	0.970961
137.669	0.938982	0.53164	0.547756	1.00358
137.853	0.939029	0.531587	0.547709	0.983921
138.037	0.904249	0.531499	0.547651	0.996453
138.221	0.913735	0.531398	0.547579	0.963992
138.405	0.949471	0.53133	0.547471	0.996748
138.589	0.95433	0.528673	0.54734	0.970607
138.773	0.919284	0.528568	0.547127	0.983808
138.957	0.838552	0.528564	0.546783	1.02298
139.141	0.903669	0.528545	0.546757	0.970832
139.325	0.86319	0.528481	0.546644	1.0168
139.509	0.91398	0.528398	0.546501	0.989974
139.693	0.878819	0.528388	0.546233	0.990079
139.877	0.883731	0.528275	0.54561	0.905237
140.061	0.903713	0.527928	0.545473	0.924509
140.245	0.873511	0.52534	0.545297	0.95078
140.429	0.847807	0.525312	0.545291	1.02268
140.613	0.86376	0.525303	0.544471	1.03599
140.798	0.903797	0.525234	0.544453	0.983921
140.982	0.80318	0.525229	0.544325	0.997123
141.166	0.832913	0.525158	0.544269	0.983895
141.35	0.777873	0.52511	0.544109	0.924691
141.534	0.858743	0.525105	0.543966	0.930879
141.718	0.86824	0.525096	0.54388	0.944577
141.902	0.838209	0.525076	0.543813	0.931267
142.086	0.797979	0.525071	0.543759	0.94395
142.27	0.798002	0.525021	0.543653	0.977115
142.454	0.848695	0.525011	0.54361	0.951206
142.638	0.823216	0.525005	0.54356	0.938213
142.822	0.787696	0.524933	0.543236	1.0094
143.006	0.818373	0.524903	0.543151	0.944748
143.19	0.767137	0.524887	0.542939	0.989671
143.374	0.828409	0.52488	0.542734	1.01665
143.558	0.803099	0.521971	0.542716	0.964034
143.742	0.83841	0.521943	0.541882	1.00367
143.926	0.767055	0.521942	0.541256	0.964479
144.11	0.823116	0.52192	0.541097	0.996499
144.294	0.767106	0.521893	0.541043	0.97674
144.479	0.767438	0.521872	0.540925	0.976713
144.663	0.802605	0.521859	0.540814	1.00322
144.847	0.803198	0.521812	0.540415	0.983456
145.031	0.797625	0.521792	0.54026	0.964094
145.215	0.797553	0.521787	0.540083	0.95741
145.399	0.782977	0.521699	0.53999	0.976784
145.583	0.772689	0.521666	0.539865	0.996515
145.767	0.802996	0.521626	0.539652	0.93784
145.951	0.797844	0.521602	0.539598	0.944979
146.135	0.777437	0.521576	0.539236	0.95058
146.319	0.757497	0.518802	0.539205	0.990476
146.503	0.757544	0.518785	0.539025	0.971127
146.687	0.762193	0.518694	0.539012	1.00337
146.871	0.777768	0.51864	0.538884	0.990554
147.055	0.777371	0.518638	0.538849	0.996213
147.239	0.742029	0.518607	0.538762	0.964774
147.423	0.762356	0.518586	0.538678	0.951156
147.607	0.726832	0.51858	0.538188	0.957592
147.791	0.757845	0.518572	0.538072	0.951545
147.975	0.777618	0.518512	0.538037	0.957408
148.16	0.797684	0.518505	0.537361	0.977368
148.344	0.742102	0.518437	0.53712	0.964036
148.528	0.696679	0.518115	0.536575	1.02272
148.712	0.756967	0.515538	0.535235	0.983613
148.896	0.746993	0.515334	0.534777	0.950928
149.08	0.747357	0.515288	0.534591	0.984047
149.264	0.742088	0.515272	0.534231	0.951127
149.448	0.726758	0.515271	0.534052	0.925066
149.632	0.712012	0.515236	0.533723	0.944761
149.816	0.681398	0.515233	0.53352	0.957509
150	0.701596	0.51521	0.533163	0.937985
150.184	0.701529	0.515124	0.532294	0.937749
150.368	0.661713	0.515105	0.531961	1.02913
150.552	0.676555	0.51509	0.531664	0.97042
150.736	0.681832	0.51214	0.531524	0.970486
150.92	0.706591	0.51213	0.530549	0.977625
151.104	0.691923	0.512092	0.529717	0.964476
151.288	0.686459	0.51207	0.529033	0.970437
151.472	0.682012	0.512065	0.528015	1.00366
151.656	0.676678	0.512003	0.527992	0.944243
151.84	0.711619	0.51199	0.527098	1.02266
152.025	0.691491	0.511966	0.526789	0.983426
152.209	0.696377	0.511935	0.525624	0.970125
152.393	0.692166	0.511934	0.525509	1.00353
152.577	0.646146	0.511915	0.525189	0.957712
152.761	0.686764	0.511874	0.522895	0.983643
152.945	0.666626	0.511863	0.522653	0.997021
153.129	0.656716	0.511841	0.52056	0.990726
153.313	0.691902	0.511809	0.522895	0.912068
153.497	0.651274	0.511795	0.522653	0.970468
153.681	0.656822	0.511778	0.52056	0.93178
153.865	0.63575	0.511749	0.527113	0.977273
154.049	0.630749	0.511733	0.526997	0.958206
154.233	0.626252	0.511688	0.52577	0.911871
154.417	0.600766	0.508843	0.524537	0.918784
154.601	0.621252	0.508837	0.529082	0.924753
154.785	0.666193	0.508825	0.520116	0.911781
154.969	0.630849	0.508738	0.523415	0.91845
155.153	0.666977	0.508724	0.522458	0.964252
155.337	0.61581	0.508713	0.522905	0.878616
155.521	0.641096	0.508684	0.530928	0.917688
155.706	0.590775	0.508596	0.516194	0.865652
155.89	0.656579	0.508592	0.535791	0.897911
156.074	0.631415	0.508538	0.531177	0.885664
156.258	0.625868	0.508534	0.526973	0.878926
156.442	0.580444	0.508502	0.517697	0.865981
156.626	0.631162	0.508482	0.521354	0.885765
156.81	0.580581	0.508477	0.523729	0.814575
156.994	0.560152	0.508467	0.51203	0.852894
157.178	0.615899	0.508458	0.530868	0.833249
157.362	0.580613	0.50834	0.523764	0.827164
157.546	0.595901	0.508253	0.532252	0.787569
157.73	0.615818	0.505545	0.520383	0.840149
157.914	0.616124	0.505517	0.535287	0.806796
158.098	0.570395	0.505496	0.525745	0.825674
158.282	0.581052	0.50549	0.537695	0.786579
158.466	0.580014	0.505471	0.533339	0.80079
158.65	0.57908	0.505407	0.526136	0.83967
158.834	0.5764	0.50538	0.535934	0.811997
159.018	0.574552	0.505351	0.528501	0.789766
159.202	0.573327	0.505306	0.521529	0.833548
159.387	0.569041	0.505232	0.533288	0.820538
159.571	0.568	0.505228	0.539152	0.81413
159.755	0.56629	0.505225	0.527803	0.792914
159.939	0.564485	0.505212	0.517135	0.800653
160.123	0.563349	0.505195	0.523221	0.777331
160.307	0.558511	0.505042	0.525826	0.80789
160.491	0.553279	0.502295	0.528012	0.801222
160.675	0.551183	0.502269	0.527001	0.800937
160.859	0.546728	0.502163	0.540066	0.794945
161.043	0.541503	0.502152	0.533106	0.784112
161.227	0.541266	0.502134	0.51294	0.775159
161.411	0.538949	0.502098	0.526876	0.794017
161.595	0.536326	0.502091	0.513297	0.792032
161.779	0.535665	0.502078	0.537985	0.788677
161.963	0.533953	0.502016	0.521371	0.800374
162.147	0.533321	0.502009	0.528935	0.756249
162.331	0.53249	0.501963	0.526319	0.779052
162.515	0.530956	0.501915	0.527642	0.789327
162.699	0.529586	0.501893	0.532125	0.81456
162.883	0.528193	0.501788	0.527092	0.786887
163.067	0.524935	0.501764	0.530275	0.748548
163.252	0.524328	0.501719	0.51365	0.737636
163.436	0.523114	0.501631	0.525385	0.759079
163.62	0.520511	0.501579	0.518921	0.743326
163.804	0.519344	0.499051	0.526616	0.751257
163.988	0.518698	0.498892	0.527543	0.754609
164.172	0.518349	0.498843	0.517004	0.755681
164.356	0.518011	0.498821	0.514777	0.785143
164.54	0.517391	0.498726	0.524708	0.706624
164.724	0.51722	0.498703	0.523224	0.762144
164.908	0.516968	0.498701	0.521975	0.762301
165.092	0.516796	0.498691	0.535866	0.77779
165.276	0.516738	0.49867	0.516813	0.745111
165.46	0.515778	0.498663	0.52242	0.762766
165.644	0.51542	0.498578	0.529609	0.727601
165.828	0.51536	0.49856	0.531131	0.778431
166.012	0.514908	0.498555	0.52378	0.767031
166.196	0.514469	0.498548	0.529417	0.735288
166.38	0.514323	0.498452	0.52504	0.712613
166.564	0.512821	0.498369	0.51838	0.743973
166.748	0.5119	0.498369	0.516118	0.723246
166.933	0.511508	0.495734	0.520961	0.755071
167.117	0.510352	0.495677	0.524914	0.752109
167.301	0.509914	0.495667	0.532809	0.734102
167.485	0.509798	0.495657	0.525179	0.746594
167.669	0.509594	0.495648	0.529275	0.751796
167.853	0.509263	0.495618	0.517159	0.782642
168.037	0.508646	0.495603	0.523147	0.763482
168.221	0.508546	0.495549	0.520224	0.750047
168.405	0.508531	0.495526	0.521587	0.807825
168.589	0.508459	0.495491	0.510755	0.751476
168.773	0.507814	0.49549	0.520051	0.756474
168.957	0.507296	0.495478	0.510109	0.750051
169.141	0.507156	0.495448	0.510743	0.738694
169.325	0.507011	0.495441	0.520709	0.710889
169.509	0.506979	0.49541	0.523582	0.758882
169.693	0.506878	0.495373	0.525601	0.73561
169.877	0.506153	0.495369	0.519133	0.742503
170.061	0.505761	0.495364	0.521751	0.72941
170.245	0.50518	0.495299	0.524631	0.731446
170.429	0.505047	0.495284	0.532455	0.756664
170.613	0.504769	0.495271	0.515548	0.754807
170.798	0.504604	0.495269	0.513722	0.747134
170.982	0.504068	0.495258	0.50659	0.748844
171.166	0.503926	0.495201	0.518712	0.742239
171.35	0.502998	0.495178	0.519634	0.713939
171.534	0.502797	0.495127	0.528351	0.748174
171.718	0.502793	0.49512	0.513939	0.727295
171.902	0.502689	0.492389	0.516383	0.717994
172.086	0.502655	0.492362	0.511985	0.700704
172.27	0.502556	0.492292	0.514964	0.758186
172.454	0.502515	0.492279	0.513429	0.711422
172.638	0.502491	0.492277	0.523143	0.756131
172.822	0.502489	0.492216	0.510504	0.694629
173.006	0.502363	0.492216	0.51488	0.731531
173.19	0.501688	0.4922	0.498274	0.735
173.374	0.50148	0.492129	0.506911	0.743732
173.558	0.501367	0.492081	0.513444	0.766611
173.742	0.500792	0.492027	0.507965	0.698681
173.926	0.500626	0.492023	0.516768	0.733875
174.11	0.500413	0.492016	0.521118	0.742511
174.294	0.49993	0.492005	0.516509	0.739272
174.479	0.499255	0.491925	0.520341	0.713406
174.663	0.498881	0.491831	0.505715	0.740925
174.847	0.498784	0.49171	0.519178	0.754332
175.031	0.49811	0.4892	0.507439	0.718187
175.215	0.497449	0.48915	0.524091	0.75458
175.399	0.497236	0.489042	0.521007	0.772461
175.583	0.497065	0.489033	0.513333	0.756657
175.767	0.496849	0.488955	0.517941	0.762726
175.951	0.496025	0.488924	0.511677	0.758564
176.135	0.495996	0.488861	0.516861	0.737351
176.319	0.495867	0.488828	0.51153	0.767859
176.503	0.495701	0.4888	0.507705	0.718439
176.687	0.495398	0.488788	0.50503	0.750408
176.871	0.495217	0.488766	0.506837	0.730598
177.055	0.494858	0.488745	0.50834	0.704344
177.239	0.494434	0.488736	0.511654	0.720207
177.423	0.494355	0.488732	0.510279	0.74082
177.607	0.494296	0.488729	0.506796	0.76437
177.791	0.494113	0.488668	0.515751	0.727586
177.975	0.493275	0.488649	0.524927	0.755668
178.16	0.493193	0.488636	0.51582	0.744864
178.344	0.49233	0.488596	0.523637	0.736838
178.528	0.491848	0.488588	0.517021	0.725628
178.712	0.491535	0.488578	0.515045	0.758002
178.896	0.491138	0.488574	0.516866	0.728868
179.08	0.491071	0.488556	0.526083	0.738451
179.264	0.491005	0.488542	0.522553	0.71365
179.448	0.49076	0.488522	0.519146	0.725682
179.632	0.490279	0.485744	0.511143	0.764042
179.816	0.489923	0.485729	0.517134	0.727283
180	0.489886	0.485708	0.51057	0.727675
180.184	0.489307	0.485686	0.516668	0.716645
180.368	0.488958	0.485618	0.516515	0.728559
180.552	0.488949	0.485608	0.505843	0.667846
180.736	0.48881	0.485595	0.525414	0.706148
180.92	0.488686	0.485588	0.510838	0.701847
181.104	0.487592	0.485582	0.511399	0.732038
181.288	0.487457	0.485535	0.517619	0.701953
181.472	0.487442	0.485468	0.512699	0.720668
181.656	0.487127	0.485455	0.522326	0.679072
181.84	0.487031	0.485445	0.505008	0.749138
182.025	0.486358	0.485439	0.501339	0.781721
182.209	0.486021	0.485415	0.509242	0.704691
182.393	0.485737	0.485405	0.520889	0.722399
182.577	0.485284	0.485386	0.517204	0.718723
182.761	0.484607	0.485374	0.503746	0.738525
182.945	0.482213	0.485314	0.508586	0.762505
183.129	0.481508	0.482462	0.496734	0.701466
183.313	0.481142	0.482438	0.502864	0.738225
183.497	0.481106	0.48243	0.515421	0.705609
183.681	0.480995	0.482369	0.520647	0.730747
183.865	0.480857	0.48236	0.504592	0.719363
184.049	0.480771	0.482336	0.517079	0.700793
184.233	0.480412	0.482308	0.501319	0.68498
184.417	0.480412	0.48223	0.504617	0.715211
184.601	0.480169	0.482207	0.506246	0.742427
184.785	0.479731	0.482206	0.510153	0.704125
184.969	0.47969	0.482195	0.501572	0.712847
185.153	0.478637	0.482052	0.506349	0.695976
185.337	0.478057	0.482047	0.518055	0.735629
185.521	0.477551	0.481989	0.51493	0.684646
185.706	0.476807	0.479195	0.500385	0.755721
185.89	0.47654	0.479179	0.500201	0.731557
186.074	0.476347	0.479151	0.502726	0.75805
186.258	0.476212	0.479146	0.498149	0.718244
186.442	0.475329	0.479145	0.507568	0.670589
186.626	0.474854	0.479115	0.492746	0.737401
186.81	0.474136	0.479113	0.497787	0.702652
186.994	0.473774	0.479084	0.500115	0.770049
187.178	0.473696	0.479014	0.500034	0.723886
187.362	0.473206	0.478977	0.498893	0.701702
187.546	0.470915	0.478971	0.505441	0.741127
187.73	0.470174	0.478969	0.499856	0.802404
187.914	0.470109	0.478938	0.499965	0.788231
188.098	0.47006	0.478935	0.50077	0.809842
188.282	0.469612	0.478906	0.512866	0.750114
188.466	0.469557	0.47881	0.499263	0.791382
188.65	0.468974	0.478807	0.505188	0.76508
188.834	0.46875	0.478702	0.499393	0.820742
189.018	0.468549	0.47868	0.505422	0.797783
189.202	0.468476	0.478665	0.508689	0.823003
189.387	0.468333	0.478622	0.506987	0.772628
189.571	0.468037	0.475872	0.493019	0.766437
189.755	0.467687	0.47586	0.493217	0.779909
189.939	0.467679	0.475807	0.494194	0.76089
190.123	0.467545	0.475696	0.497809	0.777067
190.307	0.467499	0.475627	0.497203	0.785818
190.491	0.467445	0.475603	0.500497	0.744412
190.675	0.467369	0.475549	0.496885	0.671784
190.859	0.466734	0.475524	0.497684	0.692613
191.043	0.466719	0.475397	0.494015	0.771928
191.227	0.466043	0.475382	0.49121	0.776167
191.411	0.465775	0.472637	0.481949	0.798421
191.595	0.465333	0.472512	0.495892	0.749247
191.779	0.465329	0.472512	0.502535	0.760963
191.963	0.464423	0.472504	0.491859	0.771196
192.147	0.463554	0.472492	0.485659	0.787353
192.331	0.463337	0.472463	0.487653	0.767595
192.515	0.462398	0.472328	0.494674	0.803403
192.699	0.462331	0.472308	0.48973	0.790692
192.883	0.462274	0.472252	0.493271	0.728354
193.067	0.46194	0.47221	0.487681	0.758144
193.252	0.461863	0.472145	0.480429	0.796019
193.436	0.461037	0.472058	0.493169	0.752105
193.62	0.460424	0.472019	0.494905	0.749235
193.804	0.459751	0.469338	0.498375	0.74415
193.988	0.458789	0.469322	0.488763	0.769706
194.172	0.458645	0.469261	0.507675	0.718153
194.356	0.458256	0.469259	0.498023	0.693779
194.54	0.457418	0.469111	0.493948	0.756637
194.724	0.456689	0.469067	0.487457	0.706063
194.908	0.456136	0.469036	0.496837	0.751552
195.092	0.455331	0.468957	0.493326	0.745896
195.276	0.454496	0.468925	0.48785	0.722749
195.46	0.45409	0.468878	0.48988	0.74024
195.644	0.453268	0.468798	0.486253	0.699675
195.828	0.453101	0.465992	0.493612	0.707494
196.012	0.452461	0.465992	0.491705	0.711839
196.196	0.452333	0.465943	0.481326	0.710514
196.38	0.452154	0.465924	0.491424	0.715337
196.564	0.451887	0.465871	0.486919	0.725315
196.748	0.450721	0.465863	0.499931	0.700938
196.933	0.450331	0.465855	0.490275	0.712246
197.117	0.450159	0.465827	0.487917	0.718041
197.301	0.4499	0.465827	0.488586	0.691089
197.485	0.449856	0.465812	0.495079	0.690753
197.669	0.448972	0.46579	0.490139	0.663893
197.853	0.448792	0.465789	0.49987	0.723396
198.037	0.447882	0.465768	0.486722	0.683622
198.221	0.446714	0.465744	0.491064	0.688356
198.405	0.445959	0.465721	0.487708	0.695731
198.589	0.4458	0.465702	0.495709	0.675375
198.773	0.445631	0.465539	0.496394	0.675616
198.957	0.445489	0.465525	0.495058	0.652113
199.141	0.444922	0.465479	0.484936	0.716522
199.325	0.444919	0.462713	0.489317	0.67823
199.509	0.444709	0.462659	0.484718	0.672996
199.693	0.442962	0.462533	0.485935	0.627711
199.877	0.442961	0.462514	0.486309	0.644056
200.061	0.442808	0.462507	0.488191	0.662698
200.245	0.442641	0.462497	0.481252	0.69681
200.429	0.442576	0.462494	0.484018	0.688634
200.613	0.442524	0.462489	0.483273	0.689565
200.798	0.441151	0.462465	0.485165	0.638298
200.982	0.440543	0.462453	0.487657	0.619067
201.166	0.440157	0.462443	0.493091	0.655264
201.35	0.440141	0.462383	0.487982	0.63607
201.534	0.440115	0.462344	0.493659	0.682775
201.718	0.438795	0.4623	0.485902	0.663886
201.902	0.43707	0.459473	0.494362	0.6135
202.086	0.436522	0.459427	0.484518	0.635064
202.27	0.436142	0.459424	0.483174	0.619917
202.454	0.435483	0.45937	0.495188	0.685392
202.638	0.434811	0.459369	0.473275	0.638424
202.822	0.433029	0.459291	0.492769	0.631144
203.006	0.432579	0.45929	0.480391	0.638043
203.19	0.432044	0.459237	0.488015	0.643825
203.374	0.43179	0.459218	0.486341	0.630625
203.558	0.431385	0.45921	0.483247	0.638637
203.742	0.430814	0.459205	0.493682	0.678533
203.926	0.428262	0.459193	0.485934	0.599255
204.11	0.425153	0.459186	0.488076	0.632838
204.294	0.424274	0.459178	0.479914	0.592589
204.479	0.423221	0.459174	0.489189	0.623416
204.663	0.420552	0.45909	0.48377	0.603944
204.847	0.420175	0.459074	0.486424	0.598127
205.031	0.420118	0.459045	0.483383	0.652595
205.215	0.41991	0.459015	0.471565	0.605514
205.399	0.416954	0.458998	0.480926	0.62214
205.583	0.414044	0.458992	0.478999	0.651923
205.767	0.409164	0.458987	0.471334	0.562858
205.951	0.409117	0.45897	0.477119	0.604706
206.135	0.408284	0.458955	0.489838	0.604257
206.319	0.408081	0.458909	0.478014	0.619573
206.503	0.409566	0.456132	0.48017	0.613654
206.687	0.408406	0.456052	0.482844	0.626576
206.871	0.406137	0.456023	0.484235	0.545273
207.055	0.403999	0.456016	0.479059	0.630531
207.239	0.402305	0.455981	0.475509	0.57889
207.423	0.398554	0.455943	0.477832	0.581585
207.607	0.395285	0.455919	0.477633	0.619574
207.791	0.393811	0.455896	0.48061	0.636872
207.975	0.393798	0.455741	0.464418	0.564986
208.16	0.391728	0.455728	0.47674	0.6132
208.344	0.387593	0.455718	0.47158	0.615647
208.528	0.387278	0.455677	0.483553	0.592426
208.712	0.385185	0.452846	0.471372	0.592213
208.896	0.384792	0.452807	0.467033	0.581911
209.08	0.383988	0.452798	0.478436	0.638129
209.264	0.383887	0.452767	0.472685	0.611732
209.448	0.383335	0.452736	0.467623	0.555921
209.632	0.382569	0.452689	0.484429	0.582288
209.816	0.382505	0.452657	0.474945	0.572215
210	0.38074	0.452647	0.46939	0.599149
210.184	0.39027	0.452641	0.478952	0.589832
210.368	0.410345	0.452604	0.465208	0.603225
210.552	0.395201	0.452583	0.481689	0.597066
210.736	0.405302	0.452583	0.472447	0.615393
210.92	0.412872	0.452576	0.48328	0.599316
211.104	0.373806	0.452545	0.481315	0.626771
211.288	0.391847	0.45248	0.483515	0.598138
211.472	0.406916	0.452345	0.483096	0.591209
211.656	0.390146	0.452318	0.472259	0.57326
211.84	0.421074	0.449549	0.473023	0.586056
212.025	0.398012	0.449541	0.473797	0.614591
212.209	0.37514	0.449384	0.464563	0.644422
212.393	0.37438	0.449356	0.471989	0.545496
212.577	0.373998	0.449356	0.469876	0.636021
212.761	0.373781	0.449336	0.472434	0.594452
212.945	0.373676	0.44931	0.46718	0.585827
213.129	0.373162	0.449284	0.477088	0.580295
213.313	0.372478	0.449161	0.478846	0.626691
213.497	0.371814	0.449075	0.474961	0.628429
213.681	0.371191	0.44638	0.475079	0.57391
213.865	0.371168	0.44631	0.471318	0.635062
214.049	0.370941	0.446195	0.460075	0.582916
214.233	0.370809	0.446037	0.46777	0.626015
214.417	0.370564	0.446023	0.462783	0.566238
214.601	0.370022	0.446014	0.469268	0.57488
214.785	0.369895	0.445976	0.471301	0.585348
214.969	0.369609	0.445897	0.466546	0.6101
215.153	0.369223	0.445894	0.465911	0.631287
215.337	0.369036	0.445871	0.462139	0.58391
215.521	0.36903	0.445867	0.464664	0.578477
215.706	0.364709	0.445847	0.466877	0.579937
215.89	0.36444	0.442872	0.457386	0.620445
216.074	0.363931	0.442765	0.448483	0.595314
216.258	0.3666	0.442763	0.466212	0.578847
216.442	0.366402	0.442756	0.462798	0.604673
216.626	0.363425	0.442739	0.469236	0.583556
216.81	0.363415	0.442737	0.468582	0.640338
216.994	0.363348	0.442734	0.470215	0.597442
217.178	0.367821	0.442721	0.464234	0.543194
217.362	0.367139	0.442716	0.459219	0.591471
217.546	0.36571	0.442707	0.461775	0.550586
217.73	0.365373	0.442704	0.458823	0.553254
217.914	0.368876	0.442653	0.460628	0.618997
218.098	0.362943	0.442592	0.470796	0.607603
218.282	0.362598	0.442545	0.463563	0.536283
218.466	0.36252	0.439748	0.460537	0.558058
218.65	0.362357	0.439699	0.472428	0.586194
218.834	0.362354	0.439676	0.461415	0.536803
219.018	0.361804	0.43966	0.459825	0.568307
219.202	0.361791	0.439635	0.463952	0.556659
219.387	0.361657	0.439621	0.461918	0.569436
219.571	0.361366	0.43959	0.459442	0.532581
219.755	0.360996	0.439544	0.455826	0.554636
219.939	0.360848	0.439521	0.457466	0.581553
220.123	0.360803	0.439518	0.454706	0.525383
220.307	0.360759	0.439496	0.467327	0.549109
220.491	0.360426	0.43948	0.453335	0.549951
220.675	0.360342	0.43947	0.448499	0.602684
220.859	0.360242	0.439456	0.452658	0.539999
221.043	0.360074	0.439426	0.451529	0.579194
221.227	0.360046	0.439422	0.447088	0.607654
221.411	0.359687	0.439381	0.457345	0.609576
221.595	0.359138	0.439355	0.46795	0.611968
221.779	0.358809	0.439276	0.461281	0.541454
221.963	0.358502	0.436444	0.459142	0.541462
222.147	0.357508	0.436407	0.463293	0.56611
222.331	0.357447	0.436374	0.439929	0.511083
222.515	0.357007	0.436344	0.462811	0.540752
222.699	0.355231	0.436211	0.462671	0.527953
222.883	0.355219	0.436202	0.457287	0.519949
223.067	0.35518	0.436193	0.454007	0.531263
223.252	0.354265	0.436176	0.446952	0.535612
223.436	0.354103	0.436173	0.454154	0.566585
223.62	0.353606	0.43616	0.453215	0.553363
223.804	0.353133	0.436159	0.451773	0.584654
223.988	0.357887	0.436142	0.437225	0.513602
224.172	0.357545	0.436084	0.449359	0.528867
224.356	0.356486	0.436043	0.444401	0.541244
224.54	0.356443	0.436033	0.445679	0.580267
224.724	0.358369	0.436026	0.448149	0.53127
224.908	0.358349	0.436004	0.448578	0.521499
225.092	0.356044	0.435982	0.451519	0.572952
225.276	0.353118	0.435971	0.446613	0.536935
225.46	0.352743	0.435941	0.452569	0.537936
225.644	0.354298	0.435937	0.44549	0.516782
225.828	0.356846	0.435917	0.454654	0.515138
226.012	0.352282	0.433094	0.451188	0.525225
226.196	0.352149	0.433085	0.456278	0.542806
226.38	0.352026	0.433083	0.444163	0.575261
226.564	0.351997	0.433058	0.448077	0.510887
226.748	0.351788	0.433046	0.439133	0.515098
226.933	0.35159	0.432948	0.449873	0.536522
227.117	0.351551	0.432936	0.462016	0.533027
227.301	0.351486	0.432935	0.456956	0.510983
227.485	0.351416	0.432935	0.446149	0.530435
227.669	0.351278	0.432924	0.451205	0.544145
227.853	0.351057	0.432894	0.445378	0.509159
228.037	0.350449	0.432861	0.44506	0.474451
228.221	0.350391	0.432835	0.448483	0.52976
228.405	0.350381	0.432785	0.452247	0.556119
228.589	0.350171	0.432722	0.45089	0.534494
228.773	0.350105	0.432691	0.442556	0.543052
228.957	0.349803	0.432682	0.436607	0.535125
229.141	0.34971	0.432568	0.444465	0.524877
229.325	0.348444	0.429823	0.446727	0.505649
229.509	0.348421	0.429813	0.440126	0.5448
229.693	0.347973	0.429798	0.450279	0.52593
229.877	0.347681	0.429649	0.436009	0.487648
230.061	0.347646	0.429623	0.448037	0.525115
230.245	0.347555	0.429616	0.440898	0.493915
230.429	0.345771	0.429613	0.443518	0.491536
230.613	0.345719	0.429604	0.436441	0.579648
230.798	0.3455	0.429592	0.434251	0.575418
230.982	0.348879	0.42959	0.445043	0.528437
231.166	0.348681	0.429563	0.438222	0.540427
231.35	0.348498	0.429562	0.441605	0.490634
231.534	0.346326	0.429539	0.434477	0.479586
231.718	0.346275	0.42951	0.423064	0.488558
231.902	0.346155	0.429504	0.434482	0.545967
232.086	0.349552	0.429456	0.442	0.494273
232.27	0.348942	0.429436	0.433269	0.569092
232.454	0.346043	0.429433	0.426521	0.514201
232.638	0.347107	0.42943	0.434008	0.526444
232.822	0.3471	0.429424	0.42619	0.549324
233.006	0.346465	0.429422	0.447218	0.565408
233.19	0.345451	0.429342	0.429647	0.521618
233.374	0.345023	0.426569	0.426415	0.498319
233.558	0.344704	0.426559	0.426293	0.52472
233.742	0.344491	0.426553	0.422775	0.504738
233.926	0.349695	0.426535	0.424269	0.542494
234.11	0.344454	0.426514	0.431592	0.490809
234.294	0.344242	0.426511	0.426273	0.528311
234.479	0.344171	0.426404	0.435951	0.510848
234.663	0.344032	0.426389	0.422918	0.561904
234.847	0.343397	0.426367	0.428816	0.470484
235.031	0.34329	0.42635	0.436873	0.4757
235.215	0.342565	0.426348	0.436509	0.537603
235.399	0.342304	0.426347	0.428625	0.547679
235.583	0.342009	0.426339	0.42644	0.526629
235.767	0.342007	0.426333	0.434627	0.537704
235.951	0.34121	0.426324	0.433454	0.567848
236.135	0.341194	0.426322	0.431872	0.510944
236.319	0.340649	0.426315	0.434422	0.531836
236.503	0.340345	0.426302	0.428746	0.526996
236.687	0.340115	0.42615	0.430038	0.532834
236.871	0.340034	0.426138	0.428666	0.499469
237.055	0.339628	0.42329	0.421125	0.479704
237.239	0.339388	0.423262	0.422297	0.502023
237.423	0.337293	0.423257	0.429035	0.471768
237.607	0.336683	0.423255	0.422405	0.484436
237.791	0.336596	0.423253	0.425213	0.527243
237.975	0.33645	0.423233	0.422533	0.528151
238.16	0.336399	0.423225	0.436185	0.517548
238.344	0.338306	0.423213	0.434173	0.571235
238.528	0.337964	0.423169	0.425057	0.495097
238.712	0.334482	0.42311	0.4221	0.475341
238.896	0.333973	0.423093	0.429135	0.48358
239.08	0.333959	0.423086	0.423007	0.524473
239.264	0.333927	0.423065	0.424425	0.528991
239.448	0.337874	0.423062	0.42358	0.506719
239.632	0.337742	0.423048	0.436715	0.519912
239.816	0.337437	0.422904	0.428242	0.518305
240	0.332909	0.422877	0.419998	0.525033
240.184	0.332807	0.422868	0.435212	0.52132
240.368	0.336152	0.422867	0.41654	0.515779
240.552	0.335888	0.422862	0.426111	0.481971
240.736	0.335604	0.422857	0.416782	0.508527
240.92	0.335461	0.41999	0.416289	0.511811
241.104	0.335014	0.419984	0.423536	0.512339
241.288	0.334657	0.419982	0.429708	0.486398
241.472	0.339246	0.419966	0.42018	0.501095
241.656	0.339237	0.419963	0.415195	0.503933
241.84	0.338585	0.419955	0.412738	0.524519
242.025	0.33276	0.41995	0.4375	0.527877
242.209	0.332585	0.419833	0.422802	0.47951
242.393	0.332085	0.419822	0.415473	0.527491
242.577	0.331785	0.419813	0.416185	0.50625
242.761	0.331571	0.419785	0.41554	0.453813
242.945	0.33157	0.41977	0.419419	0.505141
243.129	0.331542	0.419766	0.421727	0.494479
243.313	0.331019	0.419757	0.423697	0.486351
243.497	0.330661	0.419751	0.416221	0.538907
243.681	0.330515	0.419676	0.424627	0.506447
243.865	0.33031	0.419589	0.430649	0.51236
244.049	0.329043	0.419566	0.412803	0.530109
244.233	0.328991	0.419431	0.415829	0.460158
244.417	0.328526	0.41938	0.411761	0.520122
244.601	0.327754	0.416724	0.420817	0.502616
244.785	0.32766	0.416687	0.418754	0.552538
244.969	0.327187	0.416674	0.422737	0.508283
245.153	0.327124	0.416671	0.411003	0.49777
245.337	0.326863	0.416669	0.416841	0.500788
245.521	0.326078	0.416666	0.410431	0.481706
245.706	0.325338	0.416664	0.417769	0.520283
245.89	0.324456	0.416659	0.418447	0.52527
246.074	0.324318	0.416549	0.429136	0.526821
246.258	0.3243	0.416525	0.418798	0.529225
246.442	0.323649	0.416519	0.421283	0.48029
246.626	0.32308	0.416503	0.416457	0.526469
246.81	0.314847	0.416502	0.411807	0.498161
246.994	0.311761	0.416497	0.414355	0.492468
247.178	0.311549	0.416489	0.418876	0.490458
247.362	0.311309	0.416485	0.428825	0.479445
247.546	0.321814	0.416471	0.42802	0.498251
247.73	0.319714	0.41646	0.421691	0.564187
247.914	0.319601	0.413431	0.408575	0.489972
248.098	0.319576	0.413427	0.412753	0.513072
248.282	0.316486	0.413426	0.412849	0.472512
248.466	0.316056	0.413421	0.406031	0.455911
248.65	0.315786	0.413414	0.393695	0.451617
248.834	0.314934	0.413412	0.416718	0.544064
249.018	0.322931	0.413409	0.410889	0.504749
249.202	0.322678	0.413408	0.411942	0.541108
249.387	0.322121	0.413403	0.40419	0.498809
249.571	0.319369	0.413391	0.419745	0.486587
249.755	0.317271	0.41339	0.410046	0.514057
249.939	0.317218	0.413386	0.41023	0.527562
250.123	0.30535	0.413376	0.398202	0.505567
250.307	0.299081	0.413358	0.406448	0.514509
250.491	0.296209	0.413296	0.407294	0.478725
250.675	0.291242	0.413261	0.399849	0.506113
250.859	0.282964	0.413233	0.401538	0.511733
251.043	0.27192	0.413229	0.392801	0.499332
251.227	0.268729	0.413226	0.41184	0.536914
251.411	0.265401	0.41322	0.40504	0.497398
251.595	0.264277	0.413212	0.411512	0.507589
251.779	0.262138	0.413212	0.40781	0.516196
251.963	0.256989	0.41321	0.405022	0.483997
252.147	0.256978	0.413205	0.401831	0.500579
252.331	0.256306	0.413202	0.399223	0.496796
252.515	0.253416	0.413192	0.393001	0.472385
252.699	0.251696	0.413191	0.402819	0.533932
252.883	0.251024	0.413158	0.387711	0.513802
253.067	0.250103	0.413128	0.40748	0.51063
253.252	0.248781	0.413022	0.405227	0.494822
253.436	0.248664	0.413022	0.403593	0.501197
253.62	0.247933	0.410165	0.39738	0.532028
253.804	0.247369	0.410145	0.401432	0.475852
253.988	0.246914	0.410143	0.403819	0.478203
254.172	0.245621	0.410138	0.405947	0.477196
254.356	0.245401	0.410138	0.401691	0.532819
254.54	0.243642	0.410136	0.392404	0.501232
254.724	0.242983	0.410128	0.399553	0.455589
254.908	0.242785	0.410125	0.398317	0.468235
255.092	0.242179	0.410115	0.400341	0.48661
255.276	0.241809	0.410104	0.404773	0.498544
255.46	0.241653	0.410103	0.400092	0.499144
255.644	0.226301	0.410096	0.396186	0.519665
255.828	0.226264	0.410095	0.403266	0.559099
256.012	0.226135	0.410004	0.397978	0.462632
256.196	0.225898	0.409991	0.401051	0.440407
256.38	0.225826	0.409988	0.398942	0.495613
256.564	0.225223	0.409974	0.395576	0.453061
256.748	0.224951	0.409967	0.39529	0.499733
256.933	0.239299	0.409963	0.393207	0.488093
257.117	0.239011	0.409952	0.394413	0.517524
257.301	0.238151	0.409946	0.410324	0.456701
257.485	0.237392	0.409943	0.404117	0.42924
257.669	0.236681	0.409922	0.399118	0.464761
257.853	0.223326	0.409892	0.393022	0.464776
258.037	0.222862	0.409795	0.405296	0.466424
258.221	0.222702	0.409772	0.402056	0.499901
258.405	0.22265	0.40977	0.40234	0.483094
258.589	0.222464	0.406878	0.401884	0.510341
258.773	0.222021	0.406861	0.400119	0.478003
258.957	0.233672	0.40686	0.389434	0.474847
259.141	0.230703	0.406849	0.412925	0.476589
259.325	0.228441	0.406824	0.406541	0.476319
259.509	0.227777	0.406771	0.402832	0.497512
259.693	0.227486	0.406747	0.391943	0.489849
259.877	0.227394	0.406714	0.406229	0.477956
260.061	0.241243	0.406681	0.392777	0.483401
260.245	0.24107	0.406669	0.39856	0.515038
260.429	0.2404	0.406663	0.402934	0.481828
260.613	0.239654	0.40666	0.397638	0.460547
260.798	0.227259	0.406658	0.393703	0.475659
260.982	0.227254	0.406655	0.399288	0.468301
261.166	0.227079	0.406645	0.402332	0.440954
261.35	0.226994	0.406577	0.396025	0.471392
261.534	0.226323	0.406576	0.38354	0.496063
261.718	0.235656	0.406574	0.393124	0.497671
261.902	0.235236	0.406495	0.396186	0.47766
262.086	0.234457	0.406475	0.393738	0.47285
262.27	0.221884	0.406389	0.38652	0.481197
262.454	0.221842	0.403624	0.388288	0.430385
262.638	0.221715	0.403615	0.384948	0.370822
262.822	0.22156	0.403611	0.386931	0.35719
263.006	0.224556	0.403601	0.386719	0.395455
263.19	0.224389	0.403595	0.388563	0.367443
263.374	0.224367	0.403594	0.396924	0.361172
263.558	0.224312	0.403591	0.383015	0.346665
263.742	0.223765	0.403581	0.38278	0.410414
263.926	0.223463	0.403574	0.384508	0.375942
264.11	0.22346	0.403572	0.385678	0.399548
264.294	0.221211	0.403569	0.384375	0.38163
264.479	0.220372	0.403561	0.394682	0.392508
264.663	0.220066	0.403556	0.390065	0.416085
264.847	0.220051	0.403531	0.393102	0.349903
265.031	0.219744	0.403502	0.382756	0.359381
265.215	0.219717	0.403484	0.381856	0.355877
265.399	0.219238	0.403406	0.37796	0.32016
265.583	0.21894	0.403406	0.390138	0.388052
265.767	0.218376	0.403403	0.380267	0.353695
265.951	0.21762	0.403398	0.37441	0.317731
266.135	0.216765	0.403394	0.368772	0.321751
266.319	0.215837	0.403388	0.372982	0.367137
266.503	0.215554	0.403388	0.373838	0.318959
266.687	0.215019	0.403386	0.378057	0.334072
266.871	0.214868	0.403374	0.377805	0.328143
267.055	0.214601	0.403368	0.37545	0.369761
267.239	0.214592	0.403366	0.378418	0.346507
267.423	0.214367	0.40336	0.372836	0.343726
267.607	0.211352	0.403356	0.363745	0.340075
267.791	0.211246	0.403322	0.375008	0.31942
267.975	0.211184	0.403321	0.367553	0.319277
268.16	0.211157	0.403302	0.371675	0.317836
268.344	0.21106	0.403276	0.378912	0.273087
268.528	0.210976	0.403269	0.380837	0.322492
268.712	0.213757	0.40326	0.38083	0.351583
268.896	0.213616	0.403198	0.385359	0.341963
269.08	0.213088	0.403195	0.373674	0.395704
269.264	0.212539	0.403115	0.376627	0.405604
269.448	0.210231	0.400336	0.374313	0.334188
269.632	0.210037	0.400318	0.371943	0.26949
269.816	0.209772	0.400317	0.38577	0.319232
270	0.214328	0.40031	0.377064	0.349477
270.184	0.214092	0.400305	0.38166	0.333523
270.368	0.213814	0.400304	0.38093	0.34436
270.552	0.212373	0.400285	0.37521	0.302026
270.736	0.212287	0.400272	0.367888	0.325145
270.92	0.211817	0.40027	0.366939	0.359659
271.104	0.211611	0.400259	0.376455	0.356836
271.288	0.209697	0.400235	0.377456	0.311008
271.472	0.209198	0.400223	0.381411	0.370368
271.656	0.209134	0.400213	0.373008	0.313281
271.84	0.210485	0.400119	0.363045	0.329716
272.025	0.210301	0.400117	0.371923	0.304416
272.209	0.208691	0.400116	0.374145	0.309416
272.393	0.208689	0.400116	0.373654	0.278061
272.577	0.208634	0.400114	0.372447	0.313667
272.761	0.208294	0.40011	0.369178	0.331697
272.945	0.208089	0.400106	0.371147	0.354963
273.129	0.208085	0.400098	0.373785	0.322993
273.313	0.20796	0.400097	0.379523	0.325926
273.497	0.207669	0.400094	0.368449	0.3084
273.681	0.2075	0.400082	0.363165	0.286815
273.865	0.207431	0.400041	0.371692	0.373963
274.049	0.206356	0.400035	0.370499	0.361713
274.233	0.205944	0.399956	0.376878	0.347234
274.417	0.205891	0.399947	0.367644	0.32002
274.601	0.205727	0.399931	0.373354	0.315186
274.785	0.205698	0.399866	0.374604	0.316742
274.969	0.205353	0.399754	0.358244	0.338386
275.153	0.205312	0.397032	0.366674	0.321257
275.337	0.204807	0.396988	0.375743	0.312614
275.521	0.204541	0.396932	0.369187	0.352315
275.706	0.204427	0.396875	0.360098	0.321376
275.89	0.204339	0.396857	0.374677	0.342895
276.074	0.204046	0.396837	0.368115	0.320245
276.258	0.203792	0.396832	0.364212	0.284952
276.442	0.20368	0.396758	0.373697	0.309879
276.626	0.203563	0.396654	0.371708	0.286747
276.81	0.203127	0.396651	0.366525	0.309423
276.994	0.202787	0.396501	0.374999	0.353595
277.178	0.2026	0.396457	0.356197	0.345261
277.362	0.202316	0.396242	0.364345	0.29061
277.546	0.202303	0.393754	0.369204	0.283765
277.73	0.202082	0.39374	0.36788	0.283798
277.914	0.201912	0.393713	0.363079	0.305874
278.098	0.201566	0.393698	0.357813	0.285934
278.282	0.197269	0.393666	0.366396	0.306137
278.466	0.196967	0.393665	0.357528	0.293871
278.65	0.196764	0.393622	0.366814	0.314073
278.834	0.196478	0.393588	0.361981	0.341481
279.018	0.195884	0.393577	0.362204	0.313339
279.202	0.195808	0.393561	0.35828	0.304012
279.387	0.195048	0.393556	0.360024	0.273029
279.571	0.194821	0.393552	0.366137	0.292683
279.755	0.194734	0.393495	0.36831	0.287683
279.939	0.194501	0.393471	0.364485	0.338257
280.123	0.19438	0.393457	0.351335	0.316382
280.307	0.199866	0.393437	0.360875	0.297406
280.491	0.199377	0.393405	0.359287	0.309478
280.675	0.19919	0.393349	0.354839	0.303869
280.859	0.199051	0.39334	0.356124	0.286104
281.043	0.198914	0.393273	0.371072	0.325038
281.227	0.194274	0.390478	0.360758	0.309143
281.411	0.193711	0.39045	0.368195	0.310375
281.595	0.201503	0.390421	0.363657	0.298291
281.779	0.201149	0.390387	0.362123	0.298325
281.963	0.200685	0.390372	0.353982	0.298892
282.147	0.199974	0.390362	0.359436	0.282928
282.331	0.19876	0.390347	0.350182	0.279833
282.515	0.198612	0.390325	0.352998	0.301026
282.699	0.198441	0.390323	0.364672	0.278038
282.883	0.197964	0.390295	0.354053	0.256761
283.067	0.195444	0.390288	0.359706	0.255493
283.252	0.195435	0.390278	0.361905	0.252193
283.436	0.195425	0.390277	0.3482	0.287303
283.62	0.195267	0.390256	0.359975	0.265081
283.804	0.195099	0.390175	0.354345	0.26
283.988	0.195087	0.390169	0.356216	0.279123
284.172	0.193645	0.390165	0.347808	0.226386
284.356	0.193389	0.390138	0.356065	0.28297
284.54	0.193011	0.390109	0.358519	0.249807
284.724	0.192827	0.39001	0.347677	0.306652
284.908	0.192709	0.390009	0.348232	0.280042
285.092	0.192137	0.389875	0.353924	0.287087
285.276	0.192076	0.389734	0.348142	0.239002
285.46	0.191837	0.388641	0.351351	0.249428
285.644	0.191414	0.387193	0.346251	0.216167
285.828	0.191349	0.387191	0.335795	0.231141
286.012	0.190845	0.387187	0.349731	0.209019
286.196	0.1904	0.387182	0.352723	0.257952
286.38	0.19039	0.38718	0.353663	0.256936
286.564	0.190348	0.387169	0.345879	0.22873
286.748	0.189147	0.387063	0.344057	0.225521
286.933	0.188931	0.386994	0.345192	0.28282
287.117	0.188858	0.386989	0.349688	0.212252
287.301	0.18876	0.386983	0.3552	0.260426
287.485	0.18834	0.386974	0.344321	0.197775
287.669	0.187835	0.386972	0.342324	0.250378
287.853	0.187812	0.386969	0.345558	0.237205
288.037	0.183416	0.386965	0.354393	0.23157
288.221	0.183351	0.386952	0.335692	0.261416
288.405	0.18284	0.386843	0.348371	0.249912
288.589	0.182521	0.386827	0.342618	0.222498
288.773	0.17847	0.386809	0.345166	0.266694
288.957	0.177852	0.386797	0.351023	0.265999
289.141	0.177712	0.386784	0.345455	0.227659
289.325	0.176873	0.386709	0.356742	0.223974
289.509	0.175749	0.386305	0.352929	0.229131
289.693	0.185586	0.386942	0.352175	0.18868
289.877	0.185417	0.386921	0.343593	0.195482
290.061	0.184926	0.386847	0.344761	0.224709
290.245	0.184758	0.38681	0.343341	0.210045
290.429	0.184395	0.386723	0.333171	0.23365
290.613	0.184179	0.386714	0.348065	0.242479
290.798	0.184082	0.38671	0.351113	0.230652
290.982	0.183841	0.386662	0.352768	0.244495
291.166	0.183681	0.38666	0.341908	0.221231
291.35	0.18637	0.386583	0.343751	0.231022
291.534	0.186313	0.386456	0.351448	0.246088
291.718	0.185691	0.386358	0.348034	0.232663
291.902	0.180637	0.38604	0.34119	0.179297
292.086	0.180539	0.385764	0.341011	0.255289
292.27	0.180397	0.384597	0.335271	0.218747
292.454	0.180187	0.384419	0.340868	0.220249
292.638	0.179682	0.384383	0.339409	0.22943
292.822	0.178919	0.384363	0.344639	0.223891
293.006	0.182093	0.384294	0.338033	0.198038
293.19	0.181836	0.384248	0.346268	0.232889
293.374	0.181689	0.384207	0.344614	0.226409
293.558	0.180949	0.384183	0.345076	0.219866
293.742	0.180744	0.384135	0.3338	0.200402
293.926	0.17538	0.384112	0.33328	0.246631
294.11	0.175251	0.384133	0.336653	0.219524
294.294	0.174657	0.38317	0.346518	0.272804
294.479	0.174558	0.383389	0.34036	0.251363
294.663	0.17281	0.383368	0.336108	0.197323
294.847	0.171528	0.38331	0.342473	0.21842
295.031	0.171355	0.383299	0.347942	0.211917
295.215	0.171011	0.38321	0.338205	0.208672
295.399	0.171006	0.383002	0.342968	0.220594
295.583	0.170322	0.380841	0.341016	0.196152
295.767	0.169661	0.380357	0.339178	0.184055
295.951	0.169651	0.380247	0.330155	0.228179
296.135	0.168924	0.380107	0.332609	0.220551
296.319	0.167435	0.379905	0.32686	0.192078
296.503	0.167392	0.379871	0.339959	0.237571
296.687	0.167029	0.379058	0.331104	0.206294
296.871	0.166091	0.378827	0.33189	0.240235
297.055	0.165822	0.378751	0.335779	0.193576
297.239	0.165385	0.378701	0.342362	0.205227
297.423	0.165304	0.377886	0.333697	0.173084
297.607	0.165021	0.376407	0.332259	0.234803
297.791	0.163318	0.37632	0.339998	0.180297
297.975	0.161503	0.376288	0.327259	0.227957
298.16	0.156699	0.375758	0.328811	0.154818
298.344	0.156315	0.376112	0.335272	0.210406
298.528	0.154371	0.376066	0.332341	0.223834
298.712	0.151962	0.377959	0.326038	0.189441
298.896	0.159996	0.377828	0.327228	0.200584
299.08	0.159565	0.377722	0.332857	0.182753
299.264	0.158406	0.377819	0.326075	0.245683
299.448	0.158118	0.377626	0.331822	0.253727
299.632	0.148734	0.37766	0.328177	0.173252
299.816	0.147342	0.377647	0.324889	0.215753
300	0.144494	0.377237	0.326524	0.215289
900.184	0.00818091	-0.0111086	-0.0451288	-0.0005185
900.368	0.00503008	-0.0126207	-0.0093523	-0.0028253
900.552	0.00334009	-0.0397345	-0.029892	-0.0055871
900.736	0.00737685	-0.0205115	-0.0312525	-0.0132374
900.92	0.00609957	0.00188832	-0.0184289	-0.0116637
901.104	0.0131585	-0.0243405	-0.0237834	-0.0096404
901.288	0.0106753	-0.0015027	0.0225997	-0.000465
901.472	0.0013871	-0.0049154	-0.0408018	-0.0118329
901.656	0.0175536	-0.0528441	-0.053568	-0.0086353
901.84	0.00811304	-0.021305	-0.0315297	-0.0102731
902.025	0.00980975	-0.0103491	-0.0342534	-0.0019203
902.209	0.00975102	0.00615741	0.0198647	-0.006861
902.393	0.00735188	-0.006102	-0.0170728	-0.0061472
902.577	0.00784336	-0.0271749	-0.0432001	-0.0109537
902.761	0.00782887	-0.0277486	-0.013101	-0.0104425
902.945	0.00352224	0.00820029	0.00431974	0.00274569
903.129	0.0123911	-0.0244755	-0.0024802	-0.0131092
903.313	0.00787261	-0.0148477	-0.0529078	-0.0102896
903.497	0.00498683	-0.0013674	-0.0211886	-0.0025462
903.681	-0.0030451	0.00525594	-0.0035294	-0.0073667
903.865	9.9133e-05	-0.0071381	-0.0141084	-0.0017638
904.049	0.00564173	-0.0275828	0.0187895	-0.0056659
904.233	0.00493994	-0.0232627	0.0114668	-0.0029894
904.417	0.00027787	-0.0112693	-0.0099071	-0.0078399
904.601	0.00273407	0.0295609	0.0110408	-0.0015192
904.785	0.00418923	-0.0209273	-0.0001228	-0.0073247
904.969	-0.0002834	-0.0327567	-0.023031	-0.0029338
905.153	0.00168587	-0.01442	0.0148048	-0.0062805
905.337	0.00279054	-0.0164699	0.00628874	-0.0052176
905.521	0.00093146	-0.0438832	-0.0185619	-0.0058926
905.706	0.00476382	0.0114306	-0.0039274	-0.0041551
905.89	0.00424113	-0.0245031	0.0178856	-0.00413
906.074	-2.333e-05	-0.0233369	-0.0224229	0.0007526
906.258	0.00505689	0.0219545	0.00476611	-0.0063279
906.442	0.00795628	0.019625	0.00119724	-0.0053615
906.626	0.0033728	-0.017976	-0.0449065	0.00574787
906.81	-0.0003164	0.0365824	-0.0289418	0.00156987
906.994	0.00650023	-0.0039949	0.0124175	-0.0019938
907.178	-0.0009648	-0.0295087	-0.006509	0.00385285
907.362	0.00714175	-0.0075673	-0.0225591	-0.0074418
907.546	-0.0052337	-0.0178037	-0.0095233	-0.0052138
907.73	0.00415994	0.0313933	-0.0169177	0.00061372
907.914	-0.0099626	0.00437796	0.00796094	-0.0032151
908.098	-0.0052177	-0.0199279	0.00837997	-0.0043469
908.282	-0.0082409	0.0214968	-0.0340423	-0.0143221
908.466	-0.0043019	-0.0179362	-0.0089596	-0.0065591
908.65	-0.012652	-0.0107781	-0.0064487	-0.0073108
908.834	-0.0174654	-0.0042352	0.0257709	-0.0065217
909.018	-0.0118039	-0.0024768	-0.0162065	-0.0083651
909.202	-0.0071148	0.0060693	-0.0117732	-0.0074273
909.387	-0.0074529	0.00252336	-0.0102935	-0.0119872
909.571	-0.0092097	0.0180411	-0.0427556	-0.0041101
909.755	-0.0053858	0.0257595	0.0162718	-0.0045386
909.939	-0.002956	0.0186212	-0.0052183	0.00036768
910.123	0.00372954	-0.0117014	0.00081264	0.00570656
910.307	-0.0061311	-0.0250113	0.00255737	0.00229787
910.491	-0.0099829	0.00149851	0.0245798	-0.0047706
910.675	0.00630606	0.0384092	0.00148589	-0.0005723
910.859	-0.0049831	0.00207304	-0.0076101	-0.0019086
911.043	-0.0006115	-0.0105946	-0.0153275	0.0117462
911.227	0.0007264	0.0214722	-0.0019951	-0.0016439
911.411	-0.0051527	0.0014847	-0.0373121	-0.0002671
911.595	-0.0126853	0.0190458	0.0311165	-0.0078651
911.779	-0.0046307	-0.0231061	-0.0324742	-0.0069006
911.963	-0.011115	-0.0193214	-0.011925	-0.0001301
912.147	-0.0068688	0.0300798	-0.0011602	0.0027154
912.331	-0.0105971	-0.0138954	0.019517	0.00878931
912.515	-0.0023598	0.0405736	0.0263277	0.010419
912.699	-0.0031931	0.0268452	0.0548419	0.00873325
912.883	-0.0034366	0.0076215	0.0370282	-0.001722
913.067	-0.0065287	0.0296856	0.0162213	0.00884591
913.252	-0.0026025	0.0109866	0.0221192	0.006465
913.436	-0.0018827	0.00803584	-0.0080473	8.26e-05
913.62	-0.011906	0.00685066	0.00557353	0.0135431
913.804	-0.0014279	0.0235076	-0.0147588	0.00946823
913.988	-0.005978	-0.0039004	0.0273286	0.00253307
914.172	-0.0081246	-0.0160045	0.00606081	0.00129899
914.356	-0.0073198	0.00196932	-0.0064946	0.00847638
914.54	-0.0026957	-0.0098105	0.0203239	0.00178028
914.724	-0.0070457	-0.0257828	0.00369688	0.00395133
914.908	-0.0058465	0.00026027	0.0259459	0.00741425
915.092	-0.0069152	-0.0099915	0.0143894	0.00448992
915.276	-0.0085719	-0.004784	-0.007203	-0.0059296
915.46	-0.0018748	0.0531936	-0.0013867	0.00409978
915.644	-0.0079422	0.0422374	0.017024	0.00761601
915.828	-0.0071956	0.0230771	-0.0134498	0.00534613
916.012	0.00184318	-0.0201728	0.0513605	0.0112935
916.196	-0.0039502	-0.0071004	0.0183502	0.0127519
916.38	-0.0050698	-0.0117907	0.00926351	0.00269338
916.564	0.00646209	-0.0013941	0.0204431	0.0114185
916.748	0.00199069	0.011368	-0.0172375	0.00455143
916.933	-0.0029165	0.025218	-0.048418	0.00418427
917.117	0.00394323	-0.0055713	-0.0100884	0.00864856
917.301	0.00238457	0.0310192	0.0252353	0.00651623
917.485	-0.0007264	0.00884739	0.0309435	0.0035881
917.669	0.00533899	0.0120211	0.0466932	0.00455448
917.853	0.00166986	0.0171838	0.0234871	0.00660557
918.037	0.00233099	0.0288875	-0.0145636	0.00677597
918.221	0.00031721	-0.0114727	0.0256202	0.0148229
918.405	0.00183253	0.0505425	0.00744435	0.00383083
918.589	-0.0041713	0.00825257	0.0277292	0.00536443
918.773	-0.0015454	0.0116465	0.0400406	0.00863135
918.957	0.0003651	-0.0411755	0.0195518	0.00983073
919.141	0.00702931	0.00575359	0.018586	0.00757464
919.325	0.00169211	0.00245742	0.0175286	0.0110604
919.509	0.0148977	0.0412353	0.0296094	0.00947325
919.693	0.0087103	-0.0260564	0.0468227	0.00665698
919.877	0.00848566	0.058549	0.0310301	0.0137707
920.061	0.00680458	0.00651341	0.0275444	0.0107133
920.245	0.00706091	-0.0095431	0.0195477	0.00440771
920.429	0.00887892	0.00624935	0.0325073	0.0124522
920.613	0.00925926	0.0334617	0.0289181	0.00528893
920.798	0.0148532	0.0215829	0.0533708	0.0219157
920.982	0.0118861	0.0242205	0.0223895	0.00878707
921.166	0.0060993	0.00645681	-0.0047589	0.0157267
921.35	0.00913775	0.0291106	0.0323747	0.0066322
921.534	0.0085126	0.0130082	0.0203228	0.00488361
921.718	0.00690593	0.0339911	0.0141131	0.00926154
921.902	0.0103259	-0.0090996	0.0159858	0.0106507
922.086	0.0111777	0.0341532	0.0418166	0.0065676
922.27	0.00346573	0.0461717	0.0391184	0.0116752
922.454	0.0127821	-0.0008362	0.0279778	0.0117866
922.638	0.00923219	0.0411422	0.0272496	0.0106827
922.822	0.0128	0.0388212	0.0186345	0.0036862
923.006	0.0111859	0.0151903	0.0235687	0.00221941
923.19	0.00668605	-0.0099428	0.0292543	0.00472506
923.374	0.0112771	0.0497405	-0.0039967	0.00675263
923.558	0.0166898	0.0441788	0.0093948	0.0117648
923.742	0.0119412	0.00372416	0.0318786	0.00996639
923.926	0.0170092	0.0585463	0.028587	0.010387
924.11	0.0133335	0.0439829	0.00658267	0.0135939
924.294	0.00337486	0.0655927	0.0245361	0.00962824
924.479	0.011184	0.034879	0.0275583	0.0163835
924.663	0.0120099	0.0825953	0.0245973	0.00426536
924.847	0.00529691	0.0409261	0.00193191	0.0169371
925.031	0.00476647	0.0599226	0.0160304	0.00486031
925.215	0.00385929	0.00375114	0.0233649	0.00864022
925.399	0.010393	0.0422652	0.0268131	0.0108491
925.583	0.00771058	0.00839136	0.0296122	0.00776085
925.767	0.00283524	0.0202895	0.0186004	0.00498013
925.951	0.00271654	0.0140822	0.00519534	0.00609319
926.135	0.00245542	0.0118063	0.0180652	0.00636214
926.319	-0.0026239	-0.0029092	0.0278051	0.0052646
926.503	-0.0025046	0.0127003	-0.0199032	0.00715951
926.687	-0.0057979	0.0029688	0.00601723	0.00991606
926.871	-0.0022264	0.0653012	0.0369665	0.00363122
927.055	-0.0007722	0.0267072	0.0315203	0.00290903
927.239	-0.0027461	0.0306069	0.0420757	0.00492609
927.423	0.00211971	0.0119767	0.0133565	0.0088623
927.607	0.00121965	0.0447656	0.00336289	0.00887146
927.791	-0.0005598	0.0124029	0.0162265	0.01111
927.975	-0.0007309	0.0179124	0.00609405	0.00278417
928.16	-0.0048943	0.0275558	0.0233121	0.00934776
928.344	-0.0056648	0.00314739	0.0168299	0.00704738
928.528	-0.0024363	-0.0134644	-0.0096801	0.00842719
928.712	0.0007926	0.00439267	0.0147736	0.00648624
928.896	-0.0101299	0.0151371	0.0311845	0.00545599
929.08	-0.0075787	0.0279582	0.0216262	0.00039651
929.264	-0.0095823	0.051644	0.0610205	0.0111272
929.448	-0.0052773	0.00634067	0.0076739	0.0042089
929.632	-0.0069096	0.0428434	-0.0027585	0.0129629
929.816	-1.204e-05	0.0342978	0.0299355	0.00603983
930	-0.001708	0.0436768	0.0646659	0.0171218
930.184	-0.0006559	0.0218798	0.0182864	0.0145273
930.368	-0.0101709	0.0318272	0.0340679	0.00976927
930.552	-0.0025617	-0.0010525	0.0267139	0.00635683
930.736	-0.0055202	-0.0060165	0.0257179	0.00595313
930.92	-0.008814	-0.0149831	0.0161544	0.00839553
931.104	-0.0104156	0.0161249	0.0135299	-0.0041473
931.288	-0.0143784	0.0565669	-0.0103611	0.00830782
931.472	-0.018942	0.023491	0.0220026	0.0115423
931.656	-0.0043275	-0.0095702	0.0294557	0.0161947
931.84	-0.0096661	-0.0148689	0.0389291	0.0122031
932.025	-0.0062012	0.0141907	0.0164602	0.0143909
932.209	-0.005002	0.0273502	0.0459386	0.0143117
932.393	-0.0078702	0.0271424	0.0310876	0.00717317
932.577	-0.0071557	-0.031878	0.029449	0.0138926
932.761	-0.0053752	0.0579802	0.0457953	0.0120521
932.945	-0.0066188	-0.0057108	0.0255033	0.0064926
933.129	-0.0069076	0.0104773	0.0364215	0.0118358
933.313	-0.0160179	-0.0133926	0.0466925	0.00832511
933.497	-0.0116321	0.0133692	0.0715836	0.0116852
933.681	-0.0125903	0.00889242	0.0297688	0.0138093
933.865	-0.0056105	-0.0147818	0.0777124	0.00913655
934.049	-0.0041088	-0.0075074	0.00643578	0.0153348
934.233	-0.0082248	0.0469755	0.0157006	0.0135265
934.417	-0.008222	0.0333719	0.0425976	0.0209458
934.601	-0.0108695	0.0150611	0.0436577	0.0176655
934.785	-0.0143931	0.0151116	0.0458003	0.0111843
934.969	-0.0148901	0.00991512	0.00796607	0.00743441
935.153	-0.0126884	0.0384116	0.0220562	0.0154681
935.337	-0.0132647	0.0128921	0.0489659	0.0122029
935.521	-0.0171909	0.0496279	0.040163	0.0200228
935.706	-0.0133425	0.0109539	0.0274897	0.0101688
935.89	-0.0136779	0.0631115	0.0237776	0.0221256
936.074	-0.008638	0.0521398	0.0393837	0.031812
936.258	-0.0064456	0.0185756	0.0600997	0.0152468
936.442	-0.0196701	0.0336406	0.0228235	0.0181813
936.626	-0.0220211	0.0152886	0.0109436	0.0136979
936.81	-0.0235838	0.0548613	0.0412562	0.0132613
936.994	-0.0224775	0.00767643	0.0356892	0.0170949
937.178	-0.01171	0.0157034	0.014325	0.013872
937.362	-0.0270483	0.0266255	-0.0004597	0.0153651
937.546	-0.0309311	0.0536807	0.0198466	0.019896
937.73	-0.0266164	0.0138667	0.0480312	0.0142011
937.914	-0.0282092	0.0422386	0.0165023	0.0156686
938.098	-0.0208073	0.054542	0.0632452	0.0180872
938.282	-0.0230649	0.0374277	0.0679519	0.0165031
938.466	-0.0236845	0.0310973	0.0303689	0.0282389
938.65	-0.024092	0.0267045	0.0362238	0.0267293
938.834	-0.0240637	0.0432452	0.0267553	0.0240436
939.018	-0.0271112	0.0465832	0.0607984	0.0228641
939.202	-0.0327574	0.0445603	0.0244209	0.0208496
939.387	-0.0280409	0.0266733	0.0497881	0.00765906
939.571	-0.028931	0.0359661	0.036498	0.0192971
939.755	-0.0335709	0.027487	0.049214	0.0202926
939.939	-0.0301594	0.0420172	0.0814689	0.0196125
940.123	-0.0245225	0.0457878	0.0531986	0.0210739
940.307	-0.0256864	0.0432853	0.0534643	0.0241806
940.491	-0.0362082	0.0206839	0.0791329	0.0168252
940.675	-0.0337553	0.0175488	0.0691741	0.0238243
940.859	-0.0355268	0.035555	0.0510736	0.0299662
941.043	-0.0361784	0.0475583	0.0147195	0.0186639
941.227	-0.0349281	0.0603348	0.0561873	0.0226005
941.411	-0.0389657	0.0345248	0.0590988	0.0230215
941.595	-0.0332574	0.0379186	0.0850058	0.0217204
941.779	-0.0339457	0.0432718	0.0410751	0.0221242
941.963	-0.0354797	0.0225623	0.0791094	0.0293374
942.147	-0.0304357	0.0253036	0.0339397	0.0300256
942.331	-0.0343291	0.018788	0.0230128	0.0261408
942.515	-0.0333445	0.0224818	0.0485251	0.026441
942.699	-0.0338761	0.0115276	0.054388	0.029486
942.883	-0.0319132	0.0607667	0.0580172	0.0307819
943.067	-0.0324319	0.044366	0.048279	0.0300644
943.252	-0.033057	0.038093	0.0740262	0.0278182
943.436	-0.0297113	0.0364536	0.0622636	0.0294879
943.62	-0.032041	0.0484536	0.042988	0.0302566
943.804	-0.0247409	0.0724148	0.0633122	0.0352992
943.988	-0.030731	0.0270093	0.0142201	0.0280465
944.172	-0.0341465	0.0457722	0.082466	0.027624
944.356	-0.0367758	0.0293827	0.0479879	0.0165454
944.54	-0.0405711	0.0529904	0.00869238	0.0337397
944.724	-0.044299	0.0417966	0.0613758	0.0314696
944.908	-0.0379601	0.0758063	0.0689976	0.0414833
945.092	-0.0306313	0.0479068	0.0312812	0.041941
945.276	-0.0380808	0.056202	0.0868812	0.0393725
945.46	-0.0379295	0.0390548	0.0702897	0.0480522
945.644	-0.0357526	0.0596269	0.0659318	0.0453927
945.828	-0.0328243	0.0826309	0.0643745	0.0417864
946.012	-0.0322617	0.10021	0.0613566	0.0383881
946.196	-0.0356028	0.0859272	0.0697897	0.0485115
946.38	-0.0312454	0.0635568	0.0470604	0.0485597
946.564	-0.0343102	0.0441228	0.0461164	0.0447702
946.748	-0.0341087	0.0698188	0.0436129	0.0455637
946.933	-0.0254432	0.0951742	0.0269961	0.0438033
947.117	-0.0387834	0.0652791	0.0383385	0.0452105
947.301	-0.0324808	0.0817727	0.0551426	0.0424297
947.485	-0.038668	0.0791455	0.130756	0.0416388
947.669	-0.0413226	0.0535219	0.102307	0.034378
947.853	-0.0433162	0.0781203	0.0699363	0.0404235
948.037	-0.0515472	0.0679421	0.0680406	0.0353041
948.221	-0.050137	0.0568999	0.0462748	0.0387929
948.405	-0.0479867	0.0738092	0.0976616	0.0456656
948.589	-0.0448038	0.106661	0.0253307	0.042639
948.773	-0.0436025	0.0576045	0.0879467	0.041859
948.957	-0.0466464	0.0438909	0.0251404	0.043889
949.141	-0.0383638	0.0862948	0.041923	0.045227
949.325	-0.0430038	0.0889866	0.105643	0.0456333
949.509	-0.0373057	0.100153	0.0738485	0.0465327
949.693	-0.0454389	0.0638794	0.0670819	0.0492582
949.877	-0.0416436	0.0890805	0.110619	0.0434606
950.061	-0.046773	0.0677603	0.0692519	0.0462412
950.245	-0.047319	0.1023	0.0842061	0.0437351
950.429	-0.0413996	0.111071	0.0684725	0.0416487
950.613	-0.0472266	0.0979219	0.0623613	0.0446347
950.798	-0.0518845	0.102109	0.056125	0.0487085
950.982	-0.0455399	0.0829309	0.0563104	0.043499
951.166	-0.0477426	0.0616691	0.0591013	0.0416564
951.35	-0.0427069	0.0807387	0.0736222	0.0396522
951.534	-0.0509498	0.0317519	0.0542113	0.0388984
951.718	-0.0508453	0.0683969	0.0378217	0.0381633
951.902	-0.0437196	0.072647	0.0740046	0.0350409
952.086	-0.0468681	0.0622476	0.0426028	0.0408425
952.27	-0.0431178	0.0810495	0.0981637	0.0440123
952.454	-0.0391687	0.115376	0.0625294	0.0458723
952.638	-0.0363463	0.0902412	0.0603692	0.0406399
952.822	-0.0398173	0.0352407	0.0418673	0.0482213
953.006	-0.0494866	0.0913906	0.0725092	0.0432693
953.19	-0.0434207	0.0992164	0.0687213	0.0458472
953.374	-0.0438284	0.0892417	0.0802779	0.0485121
953.558	-0.0441098	0.0567554	0.072972	0.045223
953.742	-0.0453402	0.0943906	0.0974963	0.0389815
953.926	-0.0532844	0.097781	0.0521095	0.0383731
954.11	-0.0460177	0.0524579	0.0482454	0.0400036
954.294	-0.0470529	0.0635212	0.0440613	0.0342491
954.479	-0.0481785	0.0922035	0.0552013	0.0278737
954.663	-0.0433009	0.100428	0.0871994	0.0438284
954.847	-0.0426675	0.0887923	0.0684951	0.0385498
955.031	-0.0442185	0.085567	0.0877283	0.0389678
955.215	-0.0393771	0.0704886	0.0674708	0.0550193
955.399	-0.0447053	0.123457	0.0907219	0.0372638
955.583	-0.0399897	0.105692	0.0646182	0.0528383
955.767	-0.0351284	0.133386	0.0846971	0.0538236
955.951	-0.0344255	0.0739367	0.0697272	0.0426806
956.135	-0.0337926	0.100423	0.105148	0.0520347
956.319	-0.032382	0.0904029	0.0682016	0.0539104
956.503	-0.0409511	0.119486	0.0830579	0.0480154
956.687	-0.035166	0.074773	0.0691759	0.0526973
956.871	-0.0439079	0.0973607	0.094216	0.0508802
957.055	-0.0493658	0.0938473	0.086316	0.0412543
957.239	-0.0474547	0.101813	0.0453681	0.0473134
957.423	-0.0556736	0.115601	0.0596182	0.0497044
957.607	-0.0479175	0.106819	0.0429204	0.0424905
957.791	-0.0484187	0.0979695	0.063978	0.0549317
957.975	-0.0462837	0.111604	0.0744129	0.0442891
958.16	-0.0404543	0.0859663	0.0654714	0.0512978
958.344	-0.0413335	0.0911018	0.045201	0.0499309
958.528	-0.0363949	0.104903	0.0350618	0.0530624
958.712	-0.0444718	0.155615	0.044534	0.047328
958.896	-0.0386315	0.0924553	0.0911874	0.0453717
959.08	-0.0373407	0.119099	0.097309	0.0538631
959.264	-0.0417521	0.0834815	0.115955	0.0522663
959.448	-0.0477981	0.0835891	0.0902661	0.0414113
959.632	-0.04383	0.103654	0.0493157	0.0525186
959.816	-0.0428093	0.107864	0.0553035	0.0468039
960	-0.0465517	0.0944827	0.0665631	0.0462494
960.184	-0.0552848	0.118113	0.063197	0.0452697
960.368	-0.0426082	0.0789302	0.0439101	0.0471617
960.552	-0.0431155	0.117728	0.084945	0.0402685
960.736	-0.0480105	0.153074	0.0754384	0.0555061
960.92	-0.0350844	0.131634	0.0785729	0.0559211
961.104	-0.0403622	0.151858	0.10855	0.0546683
961.288	-0.0425705	0.144903	0.0923001	0.0609529
961.472	-0.0380705	0.132901	0.0789787	0.0597751
961.656	-0.044582	0.0829207	0.0951699	0.0515257
961.84	-0.0445912	0.151728	0.0334686	0.0501281
962.025	-0.0391596	0.111167	0.0933206	0.0481965
962.209	-0.0420352	0.118398	0.0922447	0.056924
962.393	-0.046378	0.129381	0.0485868	0.0518961
962.577	-0.0507384	0.100551	0.0374717	0.0590101
962.761	-0.0435992	0.135503	0.0777674	0.0466512
962.945	-0.0560043	0.130087	0.0606279	0.0413979
963.129	-0.0558045	0.0978168	0.0779427	0.0576132
963.313	-0.0553865	0.107552	0.0647501	0.0483082
963.497	-0.0471879	0.128893	0.0977714	0.052203
963.681	-0.0501802	0.119556	0.118511	0.050784
963.865	-0.0437887	0.133526	0.0750767	0.0579809
964.049	-0.0567836	0.1116	0.0721435	0.0564434
964.233	-0.0465687	0.111316	0.0957371	0.0441044
964.417	-0.0501292	0.153007	0.0776368	0.0574088
964.601	-0.0456029	0.130129	0.0507352	0.055268
964.785	-0.0501487	0.10416	0.103512	0.0589039
964.969	-0.0430146	0.122377	0.122053	0.0552391
965.153	-0.054173	0.141009	0.099878	0.0457452
965.337	-0.0541836	0.109834	0.0661795	0.0459585
965.521	-0.0536957	0.128839	0.0297379	0.0489436
965.706	-0.0557225	0.103795	0.0686317	0.0437145
965.89	-0.0567539	0.129501	0.0764223	0.0471182
966.074	-0.0585423	0.111573	0.135039	0.0422863
966.258	-0.0589245	0.0820442	0.0697093	0.0424653
966.442	-0.0566506	0.166861	0.104678	0.0434419
966.626	-0.0605494	0.0697327	0.0848362	0.0397636
966.81	-0.0576513	0.118054	0.0477989	0.0399597
966.994	-0.060046	0.0937989	0.0894047	0.0410101
967.178	-0.0529081	0.153364	0.0701527	0.0463433
967.362	-0.0547244	0.126296	0.116592	0.0461498
967.546	-0.0546166	0.137771	0.069422	0.0488793
967.73	-0.0505157	0.118738	0.0720199	0.0499249
[truncated: 1,262 more rows]

## Sheet: Figure 2I
	▵F/F0
Time(s)	C1	C2	C3	C4
0.26	-0.00195	-0.02398	-0.01771	0.036221
0.52	0.000897	-0.024	-0.01504	-0.00136
0.78	0.004167	-0.0192	-0.01202	-0.00118
1.04	-0.0009	-0.0195	-0.01503	0.054442
1.3	0.003778	-0.01313	-0.00643	0.062722
1.55	0.001035	-0.0241	-0.01692	0.067603
1.81	0.000875	-0.01542	-0.01525	-0.01396
2.07	0.006014	-0.01505	-0.00434	0.024943
2.33	-0.00518	-0.01357	-0.01186	0.000105
2.59	-0.00303	-0.0149	-0.0073	0.009701
2.85	0.002687	-0.01786	-0.01609	-0.01495
3.11	0.00229	-0.0156	-0.00401	0.045856
3.37	-0.00311	-0.01942	-0.01138	-0.01847
3.63	-0.00044	-0.01126	-0.007	0.032462
3.89	-0.0012	-0.01589	-0.01135	-0.01794
4.15	0.004963	-0.01018	-0.00692	-0.00724
4.4	-0.00221	-0.01113	0.000534	0.075759
4.66	-0.00283	-0.01347	-0.00245	-0.0119
4.92	-0.00014	-0.00967	0.002009	0.00115
5.18	0.0008	-0.00495	-0.00852	0.03365
5.44	-0.00227	-0.00862	0.004398	0.013658
5.7	-0.00315	-0.00853	-0.00815	0.070195
5.96	0.003689	-0.01125	2.98e-05	-0.02253
6.22	-0.00116	-0.00633	0.000904	0.034096
6.48	-0.00116	-0.00717	-0.00466	-0.00198
6.74	0.001358	-0.00727	0.000269	0.07181
6.99	-0.00413	-0.00448	-0.00604	0.026661
7.25	-0.00741	-0.00998	-0.00334	0.033363
7.51	-0.00483	-0.00594	-0.00335	-0.01102
7.77	-0.00619	0.008692	-0.00581	0.008131
8.03	-0.00844	-0.00128	-0.00414	0.023896
8.29	-0.00845	-0.00304	-0.00348	0.046718
8.55	-0.01044	-0.00714	-0.00374	-0.03282
8.81	-0.00835	0.000534	0.000277	0.064385
9.07	-0.00765	0.004021	0.002643	0.034507
9.33	-0.01115	0.0021	0.001072	0.040152
9.59	-0.01065	0.003859	-0.0025	-0.00239
9.84	-0.0049	-0.00396	0.004219	-0.00874
10.1	-0.01351	-0.00338	0.000209	-0.01432
10.36	-0.00802	-0.0023	0.001203	-0.03499
10.62	-0.00349	0.001189	-0.00483	-0.0106
10.88	-0.00353	0.010974	0.00218	-5.4e-06
11.14	-0.00346	0.005893	-0.00586	0.052996
11.4	-0.00552	0.004743	0.0012	0.028439
11.66	-0.00444	0.001154	-0.00046	0.014693
11.92	-0.01217	0.00743	-0.00531	0.028817
12.18	-0.00244	0.004301	0.002584	0.002899
12.44	-0.0023	0.005121	0.000625	0.036344
12.69	-0.00417	0.007055	0.003605	-0.05485
12.95	-0.00167	-0.00291	0.002067	-0.00269
13.21	0.00507	0.002927	0.006561	-0.01139
13.47	-0.00068	0.005955	0.003568	0.027602
13.73	0.001961	0.002814	0.008289	-0.00015
13.99	0.001489	0.007176	0.0039	0.001332
14.25	0.002486	0.010965	0.002394	-0.09013
14.51	-0.00186	0.003141	0.005745	-0.02037
14.77	-0.00087	0.005659	0.009791	0.024656
15.03	0.004282	0.015258	0.007063	-0.02994
15.28	0.004931	0.002868	0.001709	-0.00802
15.54	0.008937	0.015274	0.014578	-0.00815
15.8	0.007971	0.015259	0.007239	-0.04307
16.06	0.005435	0.002268	0.006043	-0.04098
16.32	0.007115	0.012404	0.006716	-0.02054
16.58	0.007241	0.01289	0.00424	-0.04869
16.84	0.00594	0.005655	0.004241	-0.07267
17.1	0.00648	0.008768	0.011171	0.000443
17.36	0.004742	0.011005	0.002229	-0.01126
17.62	0.002547	0.017997	0.00729	-0.05109
17.88	0.00035	0.004283	0.006497	0.018571
18.13	0.005422	0.017031	0.003156	-0.03726
18.39	0.007701	0.012432	0.000597	-0.05441
18.65	0.009879	0.01393	0.016877	-0.00581
18.91	0.005484	0.021009	0.008762	-0.1063
19.17	0.009975	0.016028	0.012802	-0.04503
19.43	0.011175	0.036915	0.019474	-0.08682
19.69	0.011068	0.014169	0.00994	-0.04917
19.95	0.008603	0.021884	0.01428	-0.00265
20.21	0.010636	0.022827	0.016085	-0.02116
20.47	0.011526	0.016565	0.014256	-0.02736
20.73	0.021242	0.031924	0.028977	-0.0744
20.98	0.015616	0.025242	0.020124	-0.05248
21.24	0.01315	0.033253	0.025263	-0.0827
21.5	0.019439	0.026643	0.027444	-0.06565
21.76	0.013184	0.023889	0.029891	-0.08638
22.02	0.019794	0.032544	0.035812	-0.01841
22.28	0.020763	0.034174	0.025013	-0.0618
22.54	0.02383	0.033317	0.03187	-0.04606
22.8	0.016049	0.037512	0.034868	-0.0376
23.06	0.020067	0.028092	0.027626	-0.06162
23.32	0.019515	0.037516	0.033848	-0.06368
23.58	0.015817	0.043163	0.031661	-0.06958
23.83	0.014686	0.033077	0.028118	-0.05933
24.09	0.014459	0.028161	0.029255	-0.10091
24.35	0.01094	0.032551	0.02849	-0.0927
24.61	0.012707	0.031221	0.032334	-0.10918
24.87	0.016357	0.041856	0.038789	-0.09043
25.13	0.017038	0.042858	0.029123	-0.09535
25.39	0.015102	0.037592	0.033667	-0.06421
25.65	0.008591	0.036445	0.035855	-0.0969
25.91	0.020834	0.027933	0.038005	-0.11039
26.17	0.023693	0.040198	0.041035	-0.01213
26.42	0.023059	0.044044	0.041548	-0.05858
26.68	0.024851	0.041985	0.052419	-0.0652
26.94	0.017914	0.03594	0.03923	-0.03761
27.2	0.019445	0.036607	0.0489	-0.06823
27.46	0.022982	0.037824	0.046053	-0.04709
27.72	0.022245	0.038902	0.04989	-0.11076
27.98	0.029817	0.044184	0.049938	-0.09003
28.24	0.03091	0.048791	0.048729	-0.03667
28.5	0.026934	0.039919	0.042524	-0.07512
28.76	0.023379	0.042423	0.045073	-0.01722
29.02	0.026079	0.043691	0.046436	-0.0888
29.27	0.026826	0.039017	0.046088	-0.03499
29.53	0.027755	0.046129	0.048168	-0.07069
29.79	0.025797	0.052447	0.049353	-0.04071
30.05	0.02927	0.049203	0.046069	-0.07117
30.31	0.031751	0.048686	0.041216	-0.06401
30.57	0.031569	0.054816	0.042212	-0.09276
30.83	0.032152	0.050793	0.038513	-0.03927
31.09	0.033954	0.066165	0.053574	-0.04415
31.35	0.035158	0.060441	0.052913	-0.05326
31.61	0.036287	0.069256	0.053759	-0.01753
31.87	0.037272	0.051553	0.048053	-0.03117
32.12	0.038076	0.045634	0.051953	-0.05785
32.38	0.039253	0.073466	0.063976	-0.09709
32.64	0.041237	0.066864	0.056405	-0.05485
32.9	0.040185	0.058848	0.064669	-0.08327
33.16	0.040786	0.067837	0.061307	-0.01713
33.42	0.046288	0.079855	0.0711	0.007342
33.68	0.052881	0.075477	0.074463	-0.05552
33.94	0.050982	0.084667	0.074663	-0.07456
34.2	0.055178	0.081307	0.080856	-0.00447
34.46	0.057334	0.086295	0.080327	-0.0852
34.71	0.059103	0.089117	0.075131	-0.07843
34.97	0.065938	0.089583	0.089541	-0.07855
35.23	0.066226	0.09469	0.084343	-0.02585
35.49	0.071459	0.094364	0.086691	-0.06827
35.75	0.07491	0.096931	0.089704	-0.06593
36.01	0.077224	0.100675	0.090712	-0.04686
36.27	0.084349	0.106966	0.091181	-0.06962
36.53	0.085804	0.106185	0.101073	0.021516
36.79	0.090855	0.114023	0.097387	-0.04093
37.05	0.092037	0.13127	0.103634	0.005934
37.31	0.098811	0.131848	0.108936	-0.02775
37.56	0.099448	0.133898	0.106298	-0.05496
37.82	0.104234	0.130511	0.104299	-0.00025
38.08	0.125949	0.170506	0.15247	0.052406
38.34	0.132703	0.173541	0.152921	0.060373
38.6	0.146882	0.184756	0.15239	0.056607
38.86	0.149612	0.190062	0.164459	0.01615
39.12	0.153478	0.195702	0.16409	0.08876
39.38	0.159687	0.198744	0.167244	0.065726
39.64	0.166048	0.302023	0.258232	0.044553
39.9	0.172592	0.296749	0.259101	0.042921
40.16	0.194267	0.325398	0.275793	0.119268
40.41	0.205668	0.319109	0.27415	0.078233
40.67	0.227047	0.356751	0.312529	0.109069
40.93	0.235274	0.3721	0.319136	-0.00798
41.19	0.241028	0.368897	0.320323	0.111422
41.45	0.287206	0.410127	0.3817	0.027505
41.71	0.291631	0.420716	0.38746	0.018819
41.97	0.321728	0.444325	0.434167	0.030737
42.23	0.332314	0.452106	0.433846	0.155338
42.49	0.324133	0.445626	0.441869	0.065721
42.75	0.325019	0.435536	0.434147	0.108799
43.01	0.359553	0.462605	0.492893	0.155785
43.26	0.365201	0.466185	0.514018	0.154062
43.52	0.362677	0.473077	0.505762	0.165538
43.78	0.369954	0.476793	0.515887	0.179067
44.04	0.371355	0.470377	0.517501	0.126764
44.3	0.372577	0.490613	0.57824	0.200706
44.56	0.376194	0.512186	0.610978	0.151485
44.82	0.378351	0.521823	0.614953	0.183383
45.08	0.379225	0.512761	0.604412	0.160037
45.34	0.378274	0.526247	0.617042	0.117667
45.6	0.376677	0.520152	0.616064	0.18841
45.85	0.388509	0.531263	0.614597	0.220869
46.11	0.387138	0.532997	0.617891	0.203216
46.37	0.388757	0.527021	0.618592	0.218131
46.63	0.385362	0.526562	0.623079	0.162003
46.89	0.384586	0.523422	0.613741	0.13676
47.15	0.384172	0.525935	0.604732	0.192251
47.41	0.388801	0.513704	0.624709	0.19099
47.67	0.385979	0.523759	0.620912	0.147085
47.93	0.393042	0.521833	0.634148	0.217643
48.19	0.397858	0.527371	0.629304	0.237496
48.45	0.40004	0.524798	0.640264	0.152212
48.7	0.409717	0.536399	0.639151	0.15027
48.96	0.412314	0.538468	0.639954	0.231939
49.22	0.413074	0.565366	0.633643	0.174145
49.48	0.420985	0.559291	0.6531	0.279422
49.74	0.409061	0.56755	0.642047	0.266427
50	0.415974	0.592496	0.646043	0.242413
50.26	0.415716	0.590545	0.659503	0.330717
50.52	0.41619	0.605029	0.656499	0.249629
50.78	0.418793	0.619273	0.662339	0.236276
51.04	0.424743	0.615569	0.6602	0.285604
51.3	0.424891	0.616611	0.657516	0.274796
51.55	0.44118	0.641336	0.679222	0.292274
51.81	0.439831	0.64739	0.684041	0.259068
52.07	0.440225	0.656295	0.688421	0.274169
52.33	0.431947	0.666017	0.691405	0.342594
52.59	0.440354	0.677996	0.696638	0.300002
52.85	0.438335	0.686299	0.703173	0.276055
53.11	0.437367	0.691302	0.71036	0.370489
53.37	0.441435	0.69784	0.710626	0.298089
53.63	0.442851	0.700991	0.71349	0.405027
53.89	0.436003	0.711762	0.726108	0.391474
54.15	0.431789	0.718686	0.709722	0.403405
54.4	0.43064	0.718545	0.721448	0.309743
54.66	0.434164	0.729895	0.713524	0.338228
54.92	0.428636	0.723358	0.713863	0.381425
55.18	0.439579	0.739095	0.714046	0.320226
55.44	0.436347	0.735859	0.714016	0.399449
55.7	0.436746	0.742846	0.714607	0.376271
55.96	0.44001	0.733738	0.722989	0.38946
56.22	0.443777	0.744684	0.709977	0.340545
56.48	0.443539	0.762489	0.714203	0.316717
56.74	0.452973	0.7639	0.721091	0.281636
56.99	0.453126	0.765596	0.717403	0.269438
57.25	0.467925	0.776831	0.720779	0.401452
57.51	0.461639	0.798833	0.72084	0.46591
57.77	0.471212	0.8061	0.722291	0.391119
58.03	0.479124	0.808146	0.729798	0.357269
58.29	0.48646	0.82035	0.7339	0.432308
58.55	0.48949	0.823578	0.736731	0.502095
58.81	0.489773	0.821693	0.744335	0.370105
59.07	0.497093	0.831462	0.743112	0.466992
59.33	0.491463	0.827839	0.743375	0.389364
59.59	0.491451	0.841357	0.761957	0.398096
59.84	0.496226	0.841878	0.751933	0.417022
60.1	0.496448	0.871737	0.757649	0.452129
60.36	0.49718	0.870861	0.760581	0.416673
60.62	0.500024	0.866275	0.752009	0.434395
60.88	0.504727	0.878626	0.756227	0.414887
61.14	0.501882	0.884331	0.746526	0.410587
61.4	0.51524	0.88861	0.752705	0.41105
61.66	0.521274	0.882651	0.757776	0.392499
61.92	0.520544	0.891908	0.761588	0.405469
62.18	0.524697	0.898016	0.766739	0.31174
62.44	0.532189	0.907626	0.768935	0.445333
62.69	0.535368	0.909303	0.764069	0.498786
62.95	0.532267	0.914916	0.75807	0.520477
63.21	0.534685	0.913148	0.76033	0.489083
63.47	0.536238	0.912597	0.769889	0.496436
63.73	0.54525	0.90352	0.771911	0.399587
63.99	0.555385	0.908221	0.775132	0.477559
64.25	0.56466	0.911788	0.780859	0.465368
64.51	0.576732	0.902563	0.784505	0.477681
64.77	0.583865	0.897865	0.786655	0.472464
65.03	0.594393	0.909855	0.797425	0.474169
65.28	0.610033	0.907375	0.800804	0.468286
65.54	0.619492	0.900894	0.804354	0.426391
65.8	0.6222	0.912631	0.801248	0.381242
66.06	0.628873	0.910321	0.802549	0.424513
66.32	0.635515	0.900018	0.810047	0.458933
66.58	0.645858	0.902144	0.8076	0.558629
66.84	0.653362	0.908516	0.814829	0.432258
67.1	0.664465	0.908468	0.810597	0.492727
67.36	0.665119	0.920398	0.812984	0.446253
67.62	0.683088	0.903612	0.813457	0.413937
67.88	0.68996	0.903342	0.820171	0.413174
68.13	0.694214	0.914972	0.819597	0.437527
68.39	0.705838	0.909692	0.812921	0.416118
68.65	0.704595	0.904254	0.813574	0.461246
68.91	0.707093	0.917388	0.813898	0.426891
69.17	0.711475	0.89115	0.801837	0.466802
69.43	0.720536	0.909874	0.818475	0.524987
69.69	0.719291	0.908093	0.816307	0.571707
69.95	0.723135	0.923408	0.820813	0.499431
70.21	0.729873	0.916164	0.828345	0.475365
70.47	0.737114	0.924366	0.837787	0.501431
70.73	0.74073	0.923712	0.838033	0.458255
70.98	0.746437	0.92065	0.852792	0.45182
71.24	0.758014	0.9117	0.849369	0.494292
71.5	0.736416	0.924513	0.839577	0.591783
71.76	0.739891	0.908319	0.845034	0.578819
72.02	0.750987	0.921471	0.855227	0.532553
72.28	0.753346	0.914134	0.856558	0.486895
72.54	0.756153	0.910126	0.85122	0.565617
72.8	0.760474	0.908831	0.864743	0.485008
73.06	0.769384	0.912185	0.865936	0.579207
73.32	0.771858	0.913923	0.861742	0.625743
73.58	0.784696	0.895545	0.860763	0.582791
73.83	0.788975	0.901488	0.866815	0.598114
74.09	0.80077	0.922839	0.884901	0.61578
74.35	0.79088	0.907042	0.870169	0.693323
74.61	0.795877	0.897345	0.86948	0.667633
74.87	0.809284	0.897278	0.874685	0.717369
75.13	0.810249	0.908419	0.875892	0.760778
75.39	0.817897	0.884175	0.880998	0.705817
75.65	0.826856	0.889565	0.892196	0.738448
75.91	0.827766	0.878854	0.889754	0.735555
76.17	0.8336	0.884545	0.896894	0.828483
76.42	0.842347	0.885806	0.907303	0.762019
76.68	0.844675	0.875009	0.915324	0.882639
76.94	0.839968	0.878082	0.915364	0.770338
77.2	0.836586	0.863365	0.914141	0.816352
77.46	0.853729	0.86231	0.923728	0.932404
77.72	0.842399	0.862271	0.909504	0.879755
77.98	0.840237	0.847003	0.916514	0.860504
78.24	0.842589	0.852233	0.914477	0.884445
78.5	0.850076	0.856483	0.925941	0.979001
78.76	0.846318	0.845662	0.926832	0.99351
79.02	0.845611	0.858667	0.929725	1.02755
79.27	0.836651	0.85194	0.935093	1.04806
79.53	0.837879	0.858405	0.938981	1.06207
79.79	0.84806	0.844535	0.934539	1.10536
80.05	0.853951	0.835715	0.951123	1.0888
80.31	0.847399	0.832306	0.944623	1.09209
80.57	0.85642	0.841291	0.958676	1.10404
80.83	0.864547	0.848187	0.955484	1.14197
81.09	0.862919	0.847592	0.958892	1.07574
81.35	0.865697	0.848418	0.958308	1.02911
81.61	0.875506	0.846523	0.969267	1.036
81.87	0.876676	0.851138	0.968279	1.06129
82.12	0.881118	0.83062	0.964124	0.992903
82.38	0.893925	0.837241	0.970873	1.05921
82.64	0.909504	0.836666	0.976656	1.06061
82.9	0.902578	0.836575	0.977083	1.07746
83.16	0.913018	0.830142	0.986791	0.942136
83.42	0.927795	0.818538	0.991526	0.997454
83.68	0.936208	0.829423	0.995876	0.995962
83.94	0.938495	0.81748	1.00173	0.992604
84.2	0.948591	0.81916	0.988445	0.928217
84.46	0.948939	0.809726	1.00077	0.945256
84.71	0.966492	0.804957	1.00523	0.930034
84.97	0.975102	0.794127	1.01231	0.914962
85.23	0.980276	0.787117	1.01244	1.03626
85.49	1.00744	0.789212	1.01965	1.03638
85.75	1.0145	0.784695	1.01499	0.890372
86.01	1.03261	0.798113	1.02139	0.843949
86.27	1.03951	0.793375	1.03152	0.806098
86.53	1.03584	0.785034	1.02844	0.868191
86.79	1.04792	0.78159	1.04246	0.8497
87.05	1.04885	0.787059	1.05125	0.960177
87.31	1.06584	0.787561	1.05862	0.904446
87.56	1.06922	0.776036	1.0528	0.937124
87.82	1.07415	0.775996	1.05995	0.863677
88.08	1.09021	0.78056	1.07399	0.944939
88.34	1.10167	0.78996	1.07417	0.946329
88.6	1.11157	0.795982	1.0797	0.837588
88.86	1.12323	0.792068	1.07644	0.846432
89.12	1.13444	0.776641	1.07485	0.800273
89.38	1.14536	0.776628	1.07906	0.826075
89.64	1.15762	0.778453	1.07774	0.805118
89.9	1.1576	0.766186	1.07568	0.950685
90.16	1.17088	0.776229	1.08186	0.906784
90.41	1.19512	0.787254	1.09248	0.935207
90.67	1.19541	0.775735	1.10431	0.87627
90.93	1.20132	0.781788	1.09732	0.919353
91.19	1.20997	0.791438	1.09778	0.984669
91.45	1.2216	0.789938	1.108	0.952936
91.71	1.23558	0.800234	1.10601	1.02146
91.97	1.25739	0.799962	1.12639	1.07575
92.23	1.25056	0.79252	1.12161	0.982336
92.49	1.26504	0.797096	1.12295	1.05148
92.75	1.27158	0.774304	1.13263	1.02218
93.01	1.27372	0.781127	1.12641	1.12348
93.26	1.29248	0.777577	1.13561	1.18262
93.52	1.30941	0.783477	1.13145	1.2435
93.78	1.30329	0.772949	1.1353	1.26874
94.04	1.31263	0.786235	1.13392	1.26731
94.3	1.31897	0.777336	1.1343	1.21062
94.56	1.33202	0.772366	1.1383	1.16867
94.82	1.3485	0.767742	1.13763	1.23144
95.08	1.36704	0.763971	1.15136	1.22779
95.34	1.38139	0.759774	1.14163	1.25732
95.6	1.37618	0.762074	1.15182	1.19436
95.85	1.3863	0.76099	1.15185	1.29585
96.11	1.39885	0.743111	1.14901	1.31955
96.37	1.42304	0.746202	1.16088	1.38226
96.63	1.44077	0.741584	1.16359	1.43865
96.89	1.46006	0.74325	1.16351	1.33902
97.15	1.47303	0.737537	1.17526	1.46008
97.41	1.48141	0.715038	1.17622	1.38177
97.67	1.49538	0.726354	1.18532	1.32549
97.93	1.49221	0.720642	1.17022	1.31673
98.19	1.50642	0.721324	1.17724	1.23639
98.45	1.51645	0.7267	1.17858	1.35682
98.7	1.53223	0.726973	1.18597	1.24249
98.96	1.53978	0.729968	1.18816	1.1605
99.22	1.54867	0.724887	1.18179	1.16218
99.48	1.54555	0.721419	1.17291	1.19688
99.74	1.56226	0.718201	1.16703	1.27561
100	1.5859	0.708288	1.18197	1.21536
100.26	1.59409	0.713462	1.18619	1.25402
100.52	1.61027	0.714598	1.19316	1.25263
100.78	1.62293	0.705554	1.19066	1.25893
101.04	1.62414	0.704103	1.19018	1.23419
101.3	1.65376	0.70233	1.20456	1.30381
101.55	1.67061	0.690925	1.21643	1.34656
101.81	1.67815	0.700303	1.20353	1.3171
102.07	1.70144	0.695347	1.21089	1.37363
102.33	1.70415	0.679583	1.21457	1.3669
102.59	1.71894	0.687179	1.22159	1.41676
102.85	1.72419	0.69661	1.21392	1.37222
103.11	1.72243	0.671205	1.20135	1.3618
103.37	1.72452	0.680996	1.21227	1.3261
103.63	1.73581	0.682374	1.206	1.34571
103.89	1.73628	0.693351	1.21049	1.1927
104.14	1.75156	0.691746	1.21432	1.29505
104.4	1.76112	0.68605	1.22013	1.3673
104.66	1.7752	0.69066	1.22381	1.44922
104.92	1.79484	0.703805	1.22454	1.49158
105.18	1.79215	0.702489	1.22806	1.46195
105.44	1.78501	0.694613	1.23318	1.51079
105.7	1.79421	0.690728	1.23392	1.64421
105.96	1.80041	0.676644	1.23739	1.57652
106.22	1.79646	0.68762	1.23239	1.5923
106.48	1.80285	0.677258	1.23796	1.68039
106.74	1.79851	0.673558	1.24312	1.71907
106.99	1.8054	0.669853	1.25429	1.73775
107.25	1.79952	0.667443	1.25166	1.82401
107.51	1.79829	0.658167	1.24222	1.81549
107.77	1.79477	0.661511	1.23385	1.83744
108.03	1.77316	0.654744	1.23283	1.82746
108.29	1.78635	0.670142	1.23573	1.85145
108.55	1.79899	0.671051	1.25045	1.90654
108.81	1.79816	0.663321	1.2543	1.96739
109.07	1.79519	0.663809	1.24693	1.99778
109.33	1.80852	0.658943	1.26102	2.07862
109.59	1.80753	0.662874	1.25579	1.97468
109.84	1.813	0.660307	1.26193	1.95207
110.1	1.80709	0.661891	1.25095	1.99979
110.36	1.82506	0.658387	1.24727	1.91885
110.62	1.82222	0.651242	1.24995	1.98679
110.88	1.82488	0.658243	1.26182	1.8701
111.14	1.83413	0.663849	1.26067	1.90519
111.4	1.8378	0.649773	1.25798	1.95276
111.66	1.83633	0.651975	1.26053	1.98942
111.92	1.82771	0.653569	1.26814	2.07743
112.18	1.84688	0.6511	1.27609	2.02532
112.44	1.83238	0.652459	1.27372	2.18453
112.69	1.82282	0.66424	1.26954	2.10341
112.95	1.8449	0.658289	1.27903	2.15076
113.21	1.84669	0.657511	1.28543	2.00946
113.47	1.83376	0.663117	1.27858	2.26297
113.73	1.84031	0.668615	1.28123	2.08227
113.99	1.85537	0.667454	1.28843	2.09741
114.25	1.84881	0.657512	1.28985	2.11858
114.51	1.84761	0.664032	1.28766	2.09442
114.77	1.85018	0.660265	1.29168	2.13457
115.03	1.85066	0.647052	1.2938	2.0689
115.28	1.85494	0.648608	1.29948	2.16746
115.54	1.85715	0.65912	1.28798	2.16711
115.8	1.84927	0.6625	1.29395	2.10646
116.06	1.84863	0.660356	1.30134	2.32026
116.32	1.84509	0.646246	1.30636	2.29666
116.58	1.82558	0.656841	1.28705	2.26149
116.84	1.83512	0.649277	1.29477	2.22219
117.1	1.83627	0.64438	1.30549	2.15737
117.36	1.83488	0.641524	1.29527	2.10664
117.62	1.83739	0.64004	1.30706	2.28306
117.88	1.84172	0.633694	1.31526	2.31541
118.13	1.84036	0.63345	1.31317	2.21385
118.39	1.83178	0.627752	1.31088	2.16269
118.65	1.82999	0.635069	1.31844	2.24893
118.91	1.84095	0.639232	1.30666	2.08705
119.17	1.83905	0.62422	1.32231	2.13707
119.43	1.84142	0.626408	1.33231	1.98705
119.69	1.83052	0.633786	1.33147	1.98142
119.95	1.8352	0.629967	1.332	1.94376
120.21	1.83287	0.618459	1.33797	1.91658
120.47	1.82672	0.626796	1.33331	1.94661
120.73	1.8217	0.612245	1.33519	1.88609
120.98	1.81222	0.619406	1.32322	1.83514
121.24	1.82023	0.620176	1.33047	1.88457
121.5	1.79641	0.611455	1.32321	1.92786
121.76	1.79351	0.614898	1.32899	1.83568
122.02	1.78977	0.608026	1.33367	1.86263
122.28	1.79814	0.586062	1.34154	1.88737
122.54	1.77885	0.614652	1.34559	1.84062
122.8	1.77673	0.608167	1.34084	1.80427
123.06	1.76332	0.615265	1.3549	1.88291
123.32	1.7592	0.614821	1.34069	1.76578
123.57	1.74189	0.607388	1.33099	1.73371
123.83	1.73349	0.601801	1.33565	1.70894
124.09	1.74406	0.608707	1.35378	1.66403
124.35	1.72874	0.601288	1.34323	1.63752
124.61	1.71225	0.598929	1.32997	1.67347
124.87	1.69894	0.595724	1.32666	1.68061
125.13	1.70333	0.591324	1.33778	1.72673
125.39	1.68757	0.587044	1.33634	1.58944
125.65	1.66491	0.588596	1.32595	1.56473
125.91	1.67203	0.584716	1.34086	1.6456
126.17	1.67043	0.592888	1.3386	1.64396
126.42	1.65579	0.586044	1.32834	1.7085
126.68	1.65252	0.591296	1.32777	1.62382
126.94	1.64271	0.585072	1.33181	1.64565
127.2	1.64581	0.590991	1.33729	1.6023
127.46	1.62223	0.587155	1.32475	1.6014
127.72	1.62739	0.58632	1.33601	1.59778
127.98	1.63076	0.594148	1.3249	1.59503
128.24	1.62217	0.585287	1.32708	1.58246
128.5	1.61251	0.591275	1.32826	1.66456
128.76	1.61237	0.582597	1.33049	1.62875
129.02	1.61577	0.594475	1.31863	1.53795
129.27	1.59796	0.591779	1.31472	1.53685
129.53	1.59316	0.582373	1.31859	1.5366
129.79	1.58545	0.576918	1.31505	1.53398
130.05	1.58777	0.567204	1.31302	1.53144
130.31	1.57277	0.577836	1.30801	1.57407
130.57	1.57298	0.573534	1.30848	1.57193
130.83	1.56899	0.581395	1.31184	1.55723
131.09	1.57403	0.571965	1.31694	1.553
131.35	1.57668	0.558244	1.31038	1.50076
131.61	1.57507	0.562415	1.32208	1.4977
131.87	1.54886	0.561035	1.30071	1.49419
132.12	1.53952	0.552142	1.29409	1.48438
132.38	1.55144	0.565675	1.3075	1.48356
132.64	1.54266	0.554063	1.3003	1.48254
132.9	1.54817	0.55174	1.30013	1.47672
133.16	1.55084	0.534715	1.30518	1.46518
133.42	1.53454	0.545547	1.29514	1.52912
133.68	1.53801	0.54589	1.3064	1.51748
133.94	1.54227	0.53689	1.31349	1.51496
134.2	1.52692	0.54414	1.30479	1.51085
134.46	1.52127	0.540675	1.29294	1.50568
134.71	1.51771	0.541394	1.28731	1.44832
134.97	1.51078	0.532524	1.28986	1.43065
135.23	1.52446	0.535679	1.29107	1.42663
135.49	1.50281	0.533075	1.27252	1.45931
135.75	1.50442	0.531609	1.27621	1.45406
136.01	1.51989	0.534294	1.26948	1.41371
136.27	1.50881	0.535213	1.27844	1.40871
136.53	1.49901	0.529199	1.27987	1.40833
136.79	1.48209	0.538505	1.26205	1.39708
137.05	1.48611	0.533455	1.25258	1.45139
137.31	1.49628	0.530606	1.26163	1.4499
137.56	1.47817	0.537614	1.25324	1.369
137.82	1.47933	0.516918	1.25491	1.36301
138.08	1.47325	0.530241	1.25818	1.36023
138.34	1.47339	0.516953	1.24835	1.3879
138.6	1.46601	0.518235	1.23836	1.38423
138.86	1.4597	0.504937	1.26044	1.37344
139.12	1.45915	0.503852	1.24351	1.34797
139.38	1.44423	0.510372	1.24202	1.34737
139.64	1.4396	0.500223	1.23186	1.34417
139.9	1.44306	0.509725	1.22796	1.35079
140.16	1.44146	0.509631	1.23019	1.34594
140.41	1.43866	0.511039	1.22277	1.34319
140.67	1.44562	0.500921	1.23582	1.3536
140.93	1.44358	0.49568	1.24266	1.33488
141.19	1.4341	0.500111	1.23077	1.34062
141.45	1.44003	0.494779	1.23679	1.33182
141.71	1.44693	0.490006	1.23149	1.3278
141.97	1.44345	0.486936	1.23452	1.34103
142.23	1.44016	0.49919	1.22562	1.33848
142.49	1.43118	0.499191	1.22393	1.33521
142.75	1.43212	0.492927	1.21375	1.31875
143	1.44414	0.48869	1.21441	1.31165
143.26	1.44994	0.487695	1.21959	1.30877
143.52	1.44557	0.487527	1.22221	1.32777
143.78	1.44772	0.485586	1.23196	1.32298
144.04	1.44624	0.485052	1.234	1.30415
144.3	1.4355	0.484954	1.22597	1.30364
144.56	1.43745	0.484704	1.22009	1.29986
144.82	1.42934	0.484697	1.21251	1.29559
145.08	1.43125	0.483569	1.21373	1.31939
145.34	1.42974	0.482854	1.20887	1.31939
145.6	1.44281	0.482473	1.22212	1.27719
145.85	1.43508	0.479976	1.21285	1.2748
146.11	1.43375	0.479221	1.21492	1.27138
146.37	1.4275	0.477907	1.20417	1.26942
146.63	1.42476	0.477646	1.20468	1.26828
146.89	1.41838	0.476506	1.19363	1.25712
147.15	1.42475	0.475635	1.19275	1.25458
147.41	1.41593	0.47476	1.19865	1.25197
147.67	1.4173	0.472317	1.20361	1.25711
147.93	1.42463	0.472215	1.19378	1.25495
148.19	1.41119	0.470342	1.19025	1.25275
148.45	1.40856	0.469655	1.19309	1.25866
148.7	1.41264	0.469399	1.18526	1.2557
148.96	1.3964	0.467413	1.18957	1.25022
149.22	1.38657	0.466335	1.16981	1.24181
149.48	1.37255	0.465099	1.16258	1.2353
149.74	1.36478	0.463871	1.1536	1.25253
150	1.36132	0.462935	1.14657	1.23497
150.26	1.3567	0.461304	1.15394	1.2331
150.52	1.34864	0.460738	1.15147	1.23938
150.78	1.34876	0.458832	1.14621	1.23241
151.04	1.34986	0.454507	1.14911	1.23674
151.3	1.35241	0.454293	1.15112	1.24144
151.55	1.36133	0.452389	1.15829	1.23503
151.81	1.35615	0.451352	1.15544	1.23289
152.07	1.35606	0.449855	1.15176	1.2264
152.33	1.36736	0.449796	1.15992	1.22374
152.59	1.3543	0.448981	1.15226	1.18626
152.85	1.34264	0.448211	1.14564	1.19592
153.11	1.34673	0.447921	1.15007	1.22224
153.37	1.34655	0.447771	1.13302	1.21903
153.63	1.34663	0.447314	1.14489	1.21083
153.89	1.34028	0.446318	1.13421	1.1936
154.14	1.3209	0.443663	1.13468	1.19544
154.4	1.32044	0.443521	1.13334	1.19518
154.66	1.3196	0.442561	1.13137	1.19272
154.92	1.31402	0.44163	1.11695	1.19789
155.18	1.3075	0.441333	1.10871	1.19752
155.44	1.31839	0.440554	1.11548	1.18751
155.7	1.31043	0.439902	1.11496	1.18217
155.96	1.3032	0.439876	1.09821	1.18216
156.22	1.32363	0.439725	1.10825	1.18161
156.48	1.31294	0.437388	1.10724	1.17837
156.74	1.32836	0.436179	1.10339	1.17154
156.99	1.3287	0.431338	1.1168	1.17067
157.25	1.32285	0.431284	1.10563	1.16946
157.51	1.31943	0.431223	1.10725	1.17852
157.77	1.31694	0.428928	1.10372	1.17667
158.03	1.31394	0.426613	1.10036	1.17382
158.29	1.32307	0.426298	1.09617	1.16461
158.55	1.3182	0.424811	1.09402	1.16674
158.81	1.30768	0.423642	1.08526	1.16976
159.07	1.30983	0.422887	1.09219	1.16859
159.33	1.31265	0.422708	1.08065	1.16912
159.59	1.3014	0.421194	1.08029	1.16549
159.84	1.30057	0.421055	1.08678	1.16037
160.1	1.28853	0.420703	1.08011	1.16621
160.36	1.2986	0.418744	1.07975	1.1699
160.62	1.30773	0.41841	1.07721	1.16512
160.88	1.29376	0.417144	1.07268	1.16161
161.14	1.29385	0.416646	1.07356	1.16148
161.4	1.2826	0.41553	1.06101	1.16923
161.66	1.2796	0.414929	1.07357	1.16762
161.92	1.27595	0.414108	1.05567	1.16645
162.18	1.27267	0.412154	1.07441	1.157
162.44	1.27728	0.411713	1.06572	1.15292
162.69	1.26933	0.407858	1.07001	1.15782
162.95	1.27682	0.407337	1.06837	1.15212
163.21	1.27722	0.407293	1.06671	1.14872
163.47	1.2615	0.407289	1.05829	1.14779
163.73	1.26107	0.407136	1.05077	1.14725
163.99	1.2603	0.407125	1.05178	1.14672
164.25	1.2514	0.406588	1.05451	1.14881
164.51	1.25433	0.406536	1.05648	1.14824
164.77	1.25969	0.405761	1.04789	1.14799
165.03	1.25137	0.405308	1.04493	1.14503
165.28	1.25773	0.404511	1.04642	1.14416
165.54	1.24704	0.403894	1.04573	1.14415
165.8	1.2469	0.402752	1.06079	1.14572
166.06	1.24768	0.402381	1.04708	1.1444
166.32	1.24662	0.400996	1.04455	1.14452
166.58	1.23215	0.400793	1.03573	1.14424
166.84	1.22573	0.400513	1.04746	1.1444
167.1	1.22739	0.399624	1.03368	1.14435
167.36	1.2172	0.399288	1.02719	1.14081
167.62	1.22779	0.395009	1.04325	1.14159
167.88	1.22558	0.395001	1.03986	1.14084
168.13	1.22177	0.394196	1.03031	1.14074
168.39	1.21173	0.393979	1.02917	1.14424
168.65	1.21351	0.391238	1.02948	1.14383
168.91	1.21945	0.391125	1.03654	1.14312
169.17	1.21514	0.390618	1.01456	1.14045
169.43	1.20279	0.390049	1.0283	1.1389
169.69	1.21059	0.389182	1.03199	1.13854
169.95	1.20454	0.388002	1.01776	1.13554
170.21	1.19614	0.387947	1.00937	1.13544
170.47	1.1969	0.387743	1.01826	1.13647
170.73	1.19751	0.387068	1.0137	1.13609
170.98	1.17941	0.386478	1.0198	1.13814
171.24	1.18803	0.385917	1.00689	1.13817
171.5	1.18461	0.385327	1.01493	1.13745
171.76	1.1949	0.385176	1.02996	1.13551
172.02	1.18157	0.385119	0.999666	1.13492
172.28	1.18328	0.384451	1.01504	1.13567
172.54	1.1793	0.384368	0.997776	1.13535
172.8	1.18209	0.383526	1.01721	1.1354
173.06	1.17206	0.383047	1.00795	1.13461
173.32	1.17393	0.38114	0.997783	1.13383
173.57	1.17136	0.380711	1.00439	1.13744
173.83	1.18156	0.380366	1.00985	1.13552
174.09	1.1746	0.380017	1.00621	1.11466
174.35	1.16412	0.379487	0.991827	1.13366
174.61	1.16943	0.379443	1.00553	1.13031
174.87	1.16898	0.379375	0.999211	1.12806
175.13	1.17585	0.378961	1.0032	1.13566
175.39	1.17796	0.37804	1.01703	1.13565
175.65	1.16131	0.377374	0.983082	1.13669
175.91	1.16726	0.374433	0.999305	1.13532
176.17	1.15687	0.371711	0.993153	1.13539
176.42	1.14732	0.371483	0.985749	1.13518
176.68	1.15598	0.370313	0.983088	1.13693
176.94	1.14091	0.3694	0.983717	1.13665
177.2	1.13869	0.366002	0.989246	1.13654
177.46	1.14088	0.365014	0.978836	1.12451
177.72	1.13913	0.364439	0.984218	1.12268
177.98	1.12832	0.363176	0.974675	1.12553
178.24	1.12427	0.362911	0.979071	1.12396
178.5	1.11479	0.360297	0.970341	1.12033
178.76	1.12354	0.359955	0.976395	1.13187
179.02	1.12093	0.358959	0.970834	1.12821
179.27	1.1148	0.353014	0.961845	1.12035
179.53	1.11304	0.351772	0.973971	1.12224
179.79	1.10686	0.350387	0.965824	1.12217
180.05	1.10784	0.34741	0.969182	1.12111
180.31	1.11146	0.345123	0.96012	1.12518
180.57	1.09539	0.342772	0.960481	1.12575
180.83	1.10827	0.342687	0.955484	1.12463
181.09	1.11339	0.342634	0.97687	1.12147
181.35	1.11403	0.339267	0.971679	1.12075
181.61	1.09634	0.336887	0.964004	1.11994
181.87	1.09474	0.333536	0.965103	1.12188
182.12	1.0962	0.331618	0.962978	1.12291
182.38	1.10198	0.330693	0.970867	1.12065
182.64	1.10174	0.330425	0.962448	1.11925
182.9	1.08843	0.328985	0.948951	1.11871
183.16	1.08029	0.328063	0.958949	1.12174
183.42	1.08314	0.32766	0.938164	1.12092
183.68	1.08441	0.327003	0.94421	1.12109
183.94	1.07747	0.326458	0.942745	1.11742
184.2	1.06869	0.326212	0.937078	1.11775
184.46	1.08026	0.325681	0.957298	1.11793
184.71	1.07084	0.324935	0.939218	1.11471
184.97	1.0697	0.322824	0.940388	1.11409
185.23	1.06554	0.322783	0.930877	1.11406
185.49	1.06542	0.318771	0.922306	1.11298
185.75	1.06762	0.317315	0.94005	1.1127
186.01	1.06494	0.316356	0.938193	1.11272
186.27	1.0647	0.315415	0.92866	1.11232
186.53	1.07072	0.311098	0.92934	1.1101
186.79	1.0668	0.311046	0.930983	1.11048
187.05	1.06444	0.310984	0.931691	1.09386
187.31	1.06733	0.310563	0.937044	1.09299
187.56	1.06003	0.308895	0.925167	1.09289
187.82	1.0673	0.308222	0.933485	1.09243
188.08	1.05857	0.307704	0.928838	1.09045
188.34	1.06146	0.307073	0.920175	1.09018
188.6	1.07287	0.307019	0.927867	1.08978
188.86	1.07395	0.306582	0.936521	1.08915
189.12	1.08135	0.304929	0.930835	1.0953
189.38	1.08906	0.303893	0.931508	1.09085
189.64	1.0907	0.302407	0.938026	1.09489
189.9	1.08397	0.299814	0.923172	1.08205
190.16	1.08361	0.298577	0.932025	1.08181
190.41	1.08295	0.297665	0.924296	1.08184
190.67	1.07232	0.297506	0.916302	1.08882
190.93	1.08231	0.297091	0.924518	1.0883
191.19	1.07021	0.296935	0.911316	1.0959
191.45	1.07944	0.291498	0.919623	1.0854
191.71	1.07249	0.28961	0.904736	1.08442
191.97	1.0734	0.289432	0.904749	1.08682
192.23	1.06393	0.289302	0.905552	1.0694
192.49	1.07037	0.289097	0.907249	1.08216
192.75	1.07559	0.288792	0.90556	1.07909
193	1.06057	0.287898	0.901532	1.07983
193.26	1.06422	0.287421	0.897511	1.07854
193.52	1.06182	0.287209	0.896044	1.07314
193.78	1.06173	0.286971	0.891156	1.07831
194.04	1.06575	0.286536	0.901045	1.08049
194.3	1.07601	0.28626	0.895083	1.0784
194.56	1.00287	0.284736	0.88508	1.07821
194.82	1.00304	0.284184	0.880489	1.079
195.08	1.00362	0.281915	0.878695	1.07773
195.34	1.00385	0.278909	0.878522	1.07035
195.6	1.0091	0.275717	0.878367	1.06839
195.85	1.00922	0.273819	0.878191	1.07648
196.11	1.01109	0.271818	0.878054	1.07644
196.37	1.01172	0.269956	0.877066	1.07337
196.63	1.01184	0.268061	0.876826	1.07336
196.89	1.01245	0.267804	0.876028	1.07326
197.15	1.01304	0.267063	0.875725	1.07208
197.41	1.01489	0.265161	0.872819	1.07139
197.67	1.01503	0.261524	0.87013	1.07497
197.93	1.01526	0.260867	0.8698	1.07472
198.19	1.0156	0.259458	0.86378	1.07427
198.45	1.01791	0.258055	0.862126	1.07053
198.7	1.01915	0.256385	0.852072	1.07033
198.96	1.01971	0.255543	0.851606	1.07015
199.22	1.02097	0.254949	0.851092	1.07125
199.48	1.02175	0.252572	0.848705	1.07095
199.74	1.0218	0.252276	0.843403	1.07069
200	1.02224	0.252254	0.8434	1.06923
200.26	1.02278	0.249759	0.842348	1.06916
200.52	1.02435	0.247178	0.842032	1.06907
200.78	1.02504	0.245378	0.835693	1.07125
201.04	1.02586	0.244402	0.83318	1.06898
201.3	1.0268	0.240475	0.82696	1.0682
201.55	1.02731	0.240073	0.823485	1.06818
201.81	1.02738	0.239668	0.82192	1.06744
202.07	1.02801	0.239551	0.820169	1.06964
202.33	1.02809	0.237184	0.817567	1.06699
202.59	1.0209	0.236554	0.813088	1.06699
202.85	1.01941	0.234129	0.791142	1.06663
203.11	1.01797	0.232298	0.789505	1.06598
203.37	1.01716	0.230309	0.786303	1.06578
203.63	1.01379	0.229304	0.784847	1.06575
203.89	1.01304	0.229271	0.783685	1.06564
204.14	1.01303	0.227794	0.781356	1.06714
204.4	1.01275	0.226242	0.77983	1.06705
204.66	1.01272	0.222218	0.779197	1.06638
204.92	1.01272	0.220691	0.773638	1.06442
205.18	1.01254	0.219523	0.768955	1.06432
205.44	1.01226	0.219508	0.768621	1.06421
205.7	1.01207	0.218799	0.765577	1.06419
205.96	1.01199	0.217708	0.765227	1.0656
206.22	1.01193	0.216784	0.763766	1.06545
206.48	1.01185	0.216189	0.757851	1.06513
206.74	1.01165	0.214597	0.755849	1.06509
206.99	1.01057	0.211307	0.754729	1.06445
207.25	1.01035	0.210637	0.750861	1.06334
207.51	1.01024	0.210514	0.746814	1.06334
207.77	1.00927	0.210094	0.744194	1.06311
208.03	1.00922	0.20575	0.742482	1.06533
208.29	1.00904	0.205283	0.740469	1.06337
208.55	1.00823	0.204078	0.733097	1.06222
208.81	1.00814	0.201495	0.728044	1.062
209.07	1.00808	0.201451	0.726725	1.06189
209.33	1.00804	0.201017	0.721785	1.06308
209.59	1.00759	0.19959	0.721369	1.06296
209.84	1.00728	0.197758	0.719925	1.06168
210.1	1.00686	0.196652	0.716733	1.06153
210.36	1.00632	0.194768	0.713376	1.06277
210.62	1.00631	0.19441	0.712309	1.06225
210.88	1.00569	0.194226	0.711963	1.06176
211.14	1.00544	0.194119	0.710479	1.06171
211.4	1.00528	0.193654	0.707811	1.06112
211.66	1.0049	0.192517	0.701447	1.06081
211.92	1.00385	0.192093	0.701116	1.06179
212.18	1.00383	0.191405	0.70008	1.05983
212.43	1.00228	0.189766	0.697149	1.05983
212.69	1.00116	0.188207	0.693262	1.05978
212.95	1.001	0.187954	0.692548	1.05966
213.21	1.00087	0.184861	0.692104	1.05901
213.47	0.99987	0.18392	0.689042	1.05888
213.73	0.998999	0.182574	0.688561	1.05887
213.99	0.998011	0.18167	0.685425	1.06126
214.25	0.997827	0.180939	0.684556	1.05933
214.51	0.99774	0.180816	0.683412	1.05919
214.77	0.997468	0.180262	0.678469	1.06059
215.03	0.997042	0.180253	0.676788	1.06018
215.28	0.995894	0.179805	0.672871	1.05724
215.54	0.995603	0.179429	0.670559	1.05682
215.8	0.994313	0.17872	0.667093	1.05674
216.06	0.993877	0.177507	0.666801	1.05834
216.32	0.991848	0.175541	0.666642	1.0582
216.58	0.99128	0.173706	0.666217	1.05767
216.84	0.981094	0.172896	0.665263	1.0575
217.1	0.97266	0.172033	0.663949	1.05801
217.36	0.967559	0.171537	0.663767	1.05769
217.62	0.965966	0.170799	0.661627	1.05539
217.88	0.965285	0.167947	0.660427	1.05537
218.13	0.963599	0.166791	0.659543	1.05529
218.39	0.963436	0.166264	0.657697	1.05526
218.65	0.955937	0.165952	0.655357	1.05745
218.91	0.955527	0.165638	0.655331	1.05659
219.17	0.951675	0.162083	0.654852	1.05658
219.43	0.950964	0.161269	0.654149	1.05617
219.69	0.949125	0.158428	0.654034	1.05369
219.95	0.947459	0.156695	0.653006	1.05368
220.21	0.946437	0.155607	0.652836	1.05365
220.47	0.945653	0.155457	0.652744	1.05516
220.73	0.944306	0.155358	0.652048	1.05475
220.98	0.943937	0.154508	0.651007	1.05433
221.24	0.941521	0.15292	0.649844	1.05424
221.5	0.940089	0.152872	0.648287	1.05262
221.76	0.93953	0.149461	0.646983	1.05255
222.02	0.936078	0.147179	0.646297	1.05254
222.28	0.934724	0.145996	0.64581	1.05219
222.54	0.932735	0.145893	0.643625	1.05167
222.8	0.93007	0.143462	0.642764	1.05143
223.06	0.927957	0.142527	0.642758	1.05101
223.32	0.927751	0.140101	0.641474	1.05078
223.57	0.927706	0.138596	0.641099	1.05059
223.83	0.927315	0.13845	0.640718	1.05045
224.09	0.924581	0.138376	0.639298	1.0534
224.35	0.919455	0.138116	0.639135	1.05336
224.61	0.917486	0.137113	0.638066	1.04732
224.87	0.917049	0.136975	0.6366	1.04702
225.13	0.915963	0.136445	0.635681	1.0466
225.39	0.9157	0.13595	0.635441	1.04646
225.65	0.915493	0.134272	0.634902	1.0504
225.91	0.915191	0.133633	0.6341	1.04882
226.17	0.913239	0.132634	0.633389	1.04799
226.42	0.913117	0.132321	0.630999	1.04768
226.68	0.912929	0.132268	0.63037	1.04738
226.94	0.912724	0.132002	0.628222	1.04409
227.2	0.911846	0.131424	0.627293	1.04352
227.46	0.911649	0.130414	0.626668	1.04319
227.72	0.911294	0.130313	0.626378	1.04269
227.98	0.909808	0.130259	0.62476	1.04247
228.24	0.908938	0.129751	0.620435	1.04128
228.5	0.908757	0.128037	0.619635	1.04584
228.76	0.908471	0.127065	0.618474	1.04512
229.02	0.908134	0.126939	0.617467	1.04425
229.27	0.906844	0.126154	0.617246	1.04085
229.53	0.906732	0.125696	0.615478	1.04054
229.79	0.906085	0.124324	0.614433	1.04051
230.05	0.905822	0.119458	0.613632	1.04044
230.31	0.905736	0.118637	0.612798	1.04116
230.57	0.905588	0.118384	0.611584	1.03871
230.83	0.905266	0.117055	0.611452	1.0387
231.09	0.904817	0.114843	0.608433	1.03847
231.35	0.90396	0.112433	0.607429	1.03818
231.61	0.903649	0.109123	0.601013	1.0381
231.86	0.903306	0.107752	0.600971	1.03778
232.12	0.90291	0.107708	0.599668	1.03773
232.38	0.902902	0.10727	0.599157	1.03703
232.64	0.902669	0.106764	0.595878	1.04017
232.9	0.902615	0.106698	0.595856	1.03984
233.16	0.902464	0.098882	0.591843	1.03929
233.42	0.902362	0.097085	0.591307	1.03876
233.68	0.901086	0.094733	0.590996	1.03397
233.94	0.900846	0.091782	0.589037	1.03393
234.2	0.900731	0.091636	0.588829	1.03389
234.46	0.900414	0.09072	0.58827	1.03348
234.71	0.899058	0.089086	0.586132	1.03331
234.97	0.898768	0.088214	0.583684	1.03304
235.23	0.897676	0.087592	0.582282	1.03226
235.49	0.897058	0.086264	0.582245	1.03148
235.75	0.89694	0.085665	0.581598	1.03136
236.01	0.896926	0.085643	0.58078	1.03111
236.27	0.896603	0.085505	0.580561	1.03696
236.53	0.895764	0.084914	0.57841	1.03631
236.79	0.895737	0.084647	0.577722	1.03605
237.05	0.895694	0.084646	0.576566	1.03563
237.31	0.894108	0.083867	0.576264	1.03208
237.56	0.893065	0.083847	0.57424	1.03552
237.82	0.892441	0.083611	0.574098	1.03518
238.08	0.891951	0.082383	0.566021	1.03503
238.34	0.891371	0.082375	0.565388	1.03446
238.6	0.889155	0.081927	0.564193	1.03405
238.86	0.888352	0.081906	0.563875	1.02669
239.12	0.884517	0.08094	0.563528	1.02659
239.38	0.882332	0.075659	0.562319	1.02645
239.64	0.881078	0.074064	0.561701	1.02608
239.9	0.868801	0.071987	0.560844	1.0296
240.16	0.868192	0.0716	0.559582	1.02904
240.41	0.867857	0.070175	0.558186	1.02897
240.67	0.866352	0.068354	0.558025	1.02766
240.93	0.86566	0.068338	0.557995	1.02736
241.19	0.86296	0.068041	0.556838	1.02726
241.45	0.862761	0.067499	0.556434	1.02427
241.71	0.860725	0.067063	0.55599	1.02397
241.97	0.860604	0.066703	0.555857	1.02392
242.23	0.858762	0.066183	0.555665	1.02359
242.49	0.85817	0.065957	0.554682	1.02594
242.75	0.857744	0.06569	0.553354	1.02583
243	0.857624	0.063631	0.553152	1.02519
243.26	0.857141	0.062389	0.552495	1.02473
243.52	0.856686	0.062328	0.551644	1.02441
243.78	0.856235	0.059342	0.550132	1.02439
244.04	0.855592	0.058018	0.549463	1.02271
244.3	0.855332	0.056915	0.54818	1.02249
244.56	0.854935	0.054004	0.547629	1.02217
244.82	0.85315	0.053315	0.547468	1.02215
245.08	0.852431	0.052054	0.547291	1.02312
245.34	0.849214	0.047727	0.547277	1.02292
245.6	0.847425	0.047174	0.54629	1.02275
245.85	0.843175	0.045368	0.546001	1.02178
246.11	0.840727	0.044977	0.545942	1.02174
246.37	0.840561	0.044413	0.545809	1.02139
246.63	0.83821	0.043304	0.541937	1.02273
246.89	0.83763	0.041098	0.539246	1.02273
247.15	0.836394	0.038545	0.53711	1.02098
247.41	0.835769	0.0379	0.535786	1.02079
247.67	0.833923	0.034885	0.533892	1.02054
247.93	0.833357	0.031118	0.532897	1.02128
248.19	0.832862	0.033281	0.532251	1.02126
248.45	0.832396	0.031305	0.528582	1.02125
248.7	0.832081	0.032222	0.527743	1.02125
248.96	0.831296	0.031191	0.526188	1.02024
249.22	0.828417	0.031278	0.523856	1.01978
249.48	0.826827	0.030587	0.522231	1.01917
249.74	0.826316	0.032019	0.52204	1.01842
250	0.826071	0.031804	0.52141	1.01835
250.26	0.823114	0.031215	0.520992	1.02051
250.52	0.820936	0.031348	0.520652	1.02051
250.78	0.820734	0.031319	0.520236	1.01644
251.04	0.819156	0.032019	0.516363	1.0159
251.29	0.819126	0.031479	0.514512	1.01578
251.55	0.818199	0.030998	0.512628	1.01551
251.81	0.817937	0.032311	0.510826	1.0179
252.07	0.816913	0.031163	0.509345	1.01777
252.33	0.816361	0.030947	0.508647	1.01757
252.59	0.812628	0.030865	0.507298	1.01368
252.85	0.812077	0.031799	0.506478	1.01367
253.11	0.811117	0.030656	0.505793	1.01357
253.37	0.810658	0.030719	0.5053	1.01354
253.63	0.810529	0.030906	0.503803	1.01745
253.89	0.810419	0.03159	0.503267	1.01736
254.14	0.809962	0.031279	0.503184	1.01694
254.4	0.80988	0.029922	0.500097	1.0153
254.66	0.809863	0.030902	0.498769	1.01457
254.92	0.80984	0.031071	0.498758	1.01273
255.18	0.809192	0.032102	0.497127	1.01236
255.44	0.809039	0.031036	0.496957	1.01093
255.7	0.808876	0.031194	0.496276	1.01074
255.96	0.808143	0.031771	0.495959	1.01066
256.22	0.807905	0.030784	0.494109	1.01321
256.48	0.80768	0.030763	0.493768	1.0132
256.74	0.806816	0.031234	0.492588	1.01278
256.99	0.80576	0.030922	0.491643	1.01018
257.25	0.805452	0.031072	0.49075	1.00898
257.51	0.805244	0.03063	0.489277	1.00891
257.77	0.803906	0.029723	0.486415	1.00887
258.03	0.802874	0.029993	0.48554	1.00887
258.29	0.802768	0.029867	0.482409	1.00999
258.55	0.802629	0.030614	0.481758	1.00995
258.81	0.80232	0.030268	0.481604	1.0091
259.07	0.801963	0.029165	0.481594	1.00835
259.33	0.800882	0.030427	0.481408	1.00828
259.59	0.800768	0.029922	0.47871	1.00822
259.84	0.800393	0.030594	0.478365	1.00762
260.1	0.800334	0.030098	0.477382	1.00846
260.36	0.800118	0.030435	0.477053	1.0084
260.62	0.799362	0.030502	0.473218	1.00653
260.88	0.798601	0.030568	0.47266	1.00639
261.14	0.798438	0.031063	0.472383	1.00628
261.4	0.798092	0.031925	0.469529	1.00627
261.66	0.796933	0.031463	0.467211	1.00714
261.92	0.796561	0.031038	0.466699	1.00704
262.18	0.796019	0.031141	0.466207	1.00699
262.43	0.796016	0.031346	0.465723	1.00687
262.69	0.795938	0.030699	0.465639	1.0067
262.95	0.795636	0.030164	0.465508	1.00562
263.21	0.7953	0.029918	0.465411	1.00553
263.47	0.795269	0.030521	0.46454	1.00552
263.73	0.795252	0.030688	0.464508	1.00549
263.99	0.795059	0.030879	0.4644	1.00547
264.25	0.795015	0.031185	0.463219	1.0062
264.51	0.794762	0.030972	0.463054	1.00586
264.77	0.794478	0.031678	0.462512	1.00447
265.03	0.794362	0.031919	0.46116	1.00444
265.28	0.79394	0.031276	0.46073	1.0044
265.54	0.793191	0.031557	0.460345	1.00521
265.8	0.792559	0.03255	0.458836	1.00478
266.06	0.792349	0.032142	0.458317	1.0046
266.32	0.792225	0.032052	0.458154	1.00358
266.58	0.79176	0.03249	0.455702	1.00337
266.84	0.791298	0.032451	0.455531	1.0033
267.1	0.791253	0.033	0.454	1.0043
267.36	0.791231	0.03278	0.453636	1.00413
267.62	0.791079	0.0321	0.452508	1.00389
267.88	0.790974	0.032443	0.451818	1.00382
268.13	0.790512	0.033311	0.450669	1.00324
268.39	0.790007	0.032206	0.450351	1.00318
268.65	0.789965	0.032384	0.449806	1.00318
268.91	0.789804	0.033904	0.449695	1.00327
269.17	0.78972	0.033269	0.449486	1.00275
269.43	0.789696	0.032858	0.448726	1.00263
269.69	0.789309	0.026666	0.446303	1.00257
269.95	0.789101	0.022961	0.44548	1.00238
270.21	0.788964	0.023158	0.442375	1.00311
270.47	0.788054	0.022805	0.440517	1.0031
270.73	0.78798	0.021894	0.437748	1.00302
270.98	0.787909	0.021441	0.436971	1.00297
271.24	0.78767	0.021078	0.436151	1.00159
271.5	0.787557	0.022291	0.436145	1.00151
271.76	0.787546	0.021592	0.435323	1.00135
272.02	0.787	0.021012	0.435293	1.00127
272.28	0.786735	0.022179	0.434472	1.00208
272.54	0.786694	0.022324	0.434316	1.00126
272.8	0.78614	0.022062	0.433336	1.00102
273.06	0.786113	0.021345	0.431799	1.0018
273.32	0.786073	0.02185	0.43148	1.00165
273.57	0.784595	0.021539	0.429261	1.00044
273.83	0.784454	0.021331	0.426826	1.00037
274.09	0.78439	0.020367	0.426156	1.00033
274.35	0.784296	0.02194	0.425962	1.00081
274.61	0.783981	0.020689	0.425584	1.00081
274.87	0.783816	0.020785	0.424772	1.00073
275.13	0.783103	0.022028	0.423744	1.00071
275.39	0.782732	0.021546	0.420136	1.00026
275.65	0.782537	0.020995	0.419608	1.00021
275.91	0.781922	0.020415	0.419289	0.999988
276.17	0.781493	0.020334	0.419121	1.00079
276.42	0.781352	0.019116	0.418737	1.00063
276.68	0.780814	0.019088	0.418429	1.0006
276.94	0.779607	0.019633	0.418423	0.999654
277.2	0.777781	0.019697	0.417463	0.999613
277.46	0.777072	0.019959	0.415113	0.99953
277.72	0.776298	0.019316	0.414815	0.999938
277.98	0.776034	0.02047	0.412271	0.999782
278.24	0.769151	0.020126	0.411901	0.999674
278.5	0.768376	0.020029	0.409918	0.998754
278.76	0.76837	0.02013	0.409073	0.998691
279.02	0.768309	0.019917	0.407905	0.998621
279.27	0.767105	0.019515	0.40727	0.999016
279.53	0.767064	0.020907	0.405181	0.999011
279.79	0.766695	0.019585	0.404401	0.998888
280.05	0.764396	0.019923	0.404229	0.998866
280.31	0.764086	0.019294	0.403758	0.998527
280.57	0.762893	0.020007	0.403563	0.998434
280.83	0.762856	0.019872	0.40326	0.998355
281.09	0.762496	0.020156	0.402567	0.998575
281.35	0.762092	0.019942	0.401393	0.998541
281.61	0.761801	0.020739	0.400376	0.998349
281.86	0.758406	0.020734	0.400229	0.998336
282.12	0.75792	0.021328	0.39882	0.998349
282.38	0.757271	0.020316	0.398066	0.998297
282.64	0.75707	0.021209	0.397675	0.998271
282.9	0.756682	0.021032	0.394499	0.998218
283.16	0.755942	0.020818	0.393684	0.997908
283.42	0.75549	0.021164	0.392815	0.997669
283.68	0.755318	0.021112	0.389963	0.997633
283.94	0.755104	0.021084	0.389151	0.998111
284.2	0.754805	0.020653	0.389016	0.997984
284.46	0.753291	0.021617	0.388819	0.997954
284.71	0.752398	0.020939	0.387612	0.996937
284.97	0.751909	0.020914	0.386816	0.996927
285.23	0.751672	0.020378	0.38664	0.996874
285.49	0.751227	0.021144	0.383297	0.996823
285.75	0.750828	0.021435	0.382972	0.997581
286.01	0.750603	0.021089	0.381842	0.997423
286.27	0.750528	0.020776	0.380486	0.996581
286.53	0.749085	0.020524	0.379641	0.996271
286.79	0.749003	0.021192	0.379427	0.996004
287.05	0.748454	0.021522	0.378954	0.995882
287.31	0.748035	0.020597	0.376073	0.995752
287.56	0.748032	0.021491	0.37598	0.996685
287.82	0.747326	0.020759	0.375693	0.996675
288.08	0.747048	0.021092	0.375265	0.995525
288.34	0.746811	0.0222	0.375142	0.995461
288.6	0.746599	0.020025	0.375105	0.995352
288.86	0.746433	0.020766	0.374782	0.995623
289.12	0.745606	0.021469	0.37459	0.994885
289.38	0.744562	0.020229	0.374412	0.994872
289.64	0.741816	0.02131	0.373098	0.994811
289.9	0.741123	0.021236	0.371802	0.995335
290.16	0.739351	0.022036	0.371226	0.995271
290.41	0.739162	0.021481	0.370582	0.995009
290.67	0.738572	0.021208	0.369741	0.994945
290.93	0.736858	0.021159	0.369236	0.994943
291.19	0.736853	0.021073	0.368752	0.995244
291.45	0.736767	0.020032	0.368729	0.995165
291.71	0.734383	0.021074	0.368632	0.995041
291.97	0.732074	0.02041	0.367392	0.994478
292.23	0.731629	0.021111	0.366593	0.994392
292.49	0.729877	0.022788	0.365546	0.994174
292.75	0.729523	0.020522	0.339967	0.993982
293	0.726084	0.020876	0.33932	0.993829
293.26	0.723247	0.021189	0.338299	0.993822
293.52	0.720368	0.02072	0.337744	0.993821
293.78	0.719136	0.020848	0.335125	0.99415
294.04	0.718826	0.022155	0.334407	0.994143
294.3	0.71877	0.021866	0.333624	0.994114
294.56	0.71828	0.021338	0.332929	0.994019
294.82	0.718002	0.021309	0.332631	0.993818
295.08	0.716633	0.020515	0.330093	0.993817
295.34	0.716335	0.021798	0.32993	0.993811
295.6	0.716303	0.021476	0.328065	0.993776
295.85	0.715716	0.018026	0.326943	0.993576
296.11	0.714597	0.016973	0.326921	0.99331
296.37	0.713215	0.016153	0.326198	0.993142
296.63	0.712593	0.016251	0.322853	0.99314
296.89	0.711508	0.016713	0.321361	0.993768
297.15	0.711411	0.017254	0.319188	0.993647
297.41	0.711103	0.016108	0.319176	0.993576
297.67	0.708462	0.015749	0.31835	0.992962
297.93	0.707843	0.016537	0.312139	0.992961
298.19	0.707663	0.016879	0.311575	0.992928
298.45	0.707334	0.017578	0.311022	0.993046
298.7	0.70586	0.016785	0.310305	0.993017
298.96	0.705528	0.017024	0.30867	0.992988
299.22	0.701253	0.017531	0.308449	0.992861
299.48	0.699805	0.016354	0.307953	0.992664
299.74	0.695137	0.016469	0.303492	0.99264
300	0.694644	0.016805	0.301814	0.992545
900.259	-0.021263	-0.0163764	0.0233916	0.01381
900.518	-0.0232305	-0.014896	0.0278643	0.01996
900.777	-0.0170639	-0.0041839	0.0263071	0.0116484
901.036	-0.0185908	-0.0152512	0.0257788	0.00042571
901.295	-0.0168862	-0.0121444	0.0241166	0.00231989
901.554	-0.0152473	-0.0105046	0.0294831	0.00741234
901.813	-0.0141218	-0.0121817	0.0235477	0.00650981
902.073	-0.0139785	-0.0156755	0.0210549	0.00204304
902.332	-0.016309	-0.0117314	0.0211086	-0.000561
902.591	-0.0142452	-0.0061773	0.0191723	-0.0039478
902.85	-0.0130765	-0.0128682	0.0192314	0.00361233
903.109	-0.0150736	-0.014213	0.021781	0.00990288
903.368	-0.0142236	-0.0047534	0.0208672	0.00183223
903.627	-0.0121725	-0.0077702	0.0208607	0.0149645
903.886	-0.0105156	-0.0037942	0.0205069	0.00495942
904.145	-0.0138622	-0.0116992	0.018583	0.00297238
904.404	-0.0132306	-0.0066831	0.0161868	0.00370164
904.663	-0.0093254	-0.0092052	0.0148588	0.00854822
904.922	-0.0107313	-0.0019134	0.0182097	-0.0019979
905.181	-0.0130699	-0.0102968	0.0095641	0.0124015
905.44	-0.0117057	-0.009418	0.0147477	0.00808226
905.699	-0.0118388	-0.0045138	0.00901987	-0.0048734
905.959	-0.0158312	-0.0060476	0.00621279	0.0125476
906.218	-0.0079338	-0.0023561	0.0114734	0.00986207
906.477	-0.0021567	-0.0003073	0.0191192	0.0118253
906.736	0.0007883	0.0093184	0.0160719	0.0167382
906.995	-0.0003244	0.0103819	0.0165381	0.0104002
907.254	-0.0006815	0.00549274	0.00929953	0.0095596
907.513	-0.0005954	0.00533312	0.0156074	0.00529652
907.772	0.00115122	0.00881775	0.0111687	0.0198247
908.031	0.0012594	-0.000759	0.00701687	0.0102527
908.29	-0.0020051	0.00084634	0.00620886	0.00904686
908.549	-0.0013496	0.00347899	0.00881397	-0.0056786
908.808	-0.0004529	-0.0024378	0.00314821	0.00303958
909.067	0.0012011	0.0027088	0.00945759	0.00193168
909.326	-0.0043878	-0.0125142	0.00283307	0.00135632
909.585	0.00101759	0.00740402	0.00484259	0.0130524
909.845	0.0016192	0.00543187	0.00453772	0.0233946
910.104	0.000952	9.5133e-06	0.00434817	0.00875918
910.363	-0.000202	-0.0049898	-0.0025195	-0.0016426
910.622	-0.0013562	0.00189723	-0.0039222	0.00920314
910.881	-0.0030706	-0.0056175	-0.0028952	-0.0021119
911.14	0.00652514	-0.0010128	0.00123419	-0.0091923
911.399	-0.0009177	0.00031705	-0.0034555	-0.0036331
911.658	0.00737566	0.00034543	-0.0025466	0.00467919
911.917	0.00446217	0.00043413	-0.0039728	0.00528899
912.176	-0.0021438	0.00455874	-0.0087293	-0.0098096
912.435	0.0029375	-0.0003051	-0.0085711	-0.0007174
912.694	0.00959324	0.00573144	-0.0090733	-0.0112019
912.953	0.0106062	0.00533306	-0.0072888	-0.0031573
913.212	0.0104867	0.00321882	-0.0072585	-0.003709
913.471	0.00920755	0.00347891	-0.0099252	0.00616181
913.731	0.00598055	0.00345853	-0.0099213	-0.0030007
913.99	0.00814407	0.00202427	-0.0113391	-0.0004283
914.249	0.0118254	0.00459828	-0.012152	0.00749951
914.508	0.00839464	0.0088819	-0.0068892	-0.0040306
914.767	0.00687831	0.00207605	-0.0136323	0.00295871
915.026	0.00926778	0.0129027	-0.0137617	-0.0117699
915.285	0.00721086	0.00915937	-0.0160775	-0.0098047
915.544	0.0108915	0.00562871	-0.0166117	-0.0036803
915.803	0.0133178	0.0115791	-0.0170949	-0.002542
916.062	0.0119667	0.00259569	-0.016582	-0.0133559
916.321	0.0136688	0.00758315	-0.0146289	-0.0080321
916.58	0.00856041	0.00143311	-0.0214443	-0.0180763
916.839	0.00673263	-0.0007707	-0.023815	-0.0214396
917.098	0.00568929	0.00472524	-0.0257186	-0.0274399
917.357	0.00669153	0.00434303	-0.0243949	-0.0214821
917.617	0.0101121	0.00306639	-0.0248039	-0.0207844
917.876	0.0106078	-6.068e-05	-0.0226958	-0.0144668
918.135	0.016823	0.0153744	-0.0229047	-0.0147203
918.394	0.0133111	0.00746163	-0.0262541	-0.0132966
918.653	0.0152697	0.00166434	-0.029669	-0.0142121
918.912	0.0170361	0.0107585	-0.021466	-0.0111699
919.171	0.0171189	0.0175614	-0.025866	-0.0057914
919.43	0.0124104	0.0114622	-0.0279822	-0.0128372
919.689	0.0105927	0.00118047	-0.0328977	-0.0146777
919.948	0.0164434	0.00370308	-0.0288368	-0.0110295
920.207	0.0190424	0.0156696	-0.0265769	0.00251664
920.466	0.01346	0.00207006	-0.0307035	-0.0146678
920.725	0.0159173	0.0132133	-0.0336894	-0.014462
920.984	0.0171989	0.00785684	-0.0301137	-0.0020401
921.243	0.0248264	0.0148633	-0.0273465	-0.0147489
921.503	0.0145076	0.012511	-0.0310908	-0.0099517
921.762	0.0188355	0.0191171	-0.0290038	-0.0087531
922.021	0.0164342	0.0120794	-0.0353544	-0.001189
922.28	0.0198005	0.0133294	-0.0358005	0.00335175
922.539	0.0226518	0.0213371	-0.0318164	0.00667099
922.798	0.0203613	0.0226638	-0.0322389	0.00901011
923.057	0.0260835	0.0176167	-0.0345313	0.0115635
923.316	0.0302902	0.0210189	-0.0292706	0.0153743
923.575	0.0265398	0.0235811	-0.0324721	0.00951728
923.834	0.024403	0.0205339	-0.0354617	0.00437261
924.093	0.0254875	0.0231489	-0.0361686	0.0140917
924.352	0.0247346	0.0143763	-0.0363918	0.00918012
924.611	0.0231818	0.0162303	-0.0379647	0.0271819
924.87	0.0278989	0.018626	-0.0331856	0.0181676
925.129	0.0227179	0.02408	-0.0383553	0.00754715
925.389	0.0216369	0.0183112	-0.0386955	0.0101573
925.648	0.0234289	0.0201482	-0.03782	0.00630964
925.907	0.0254994	0.0287472	-0.0381545	0.0172899
926.166	0.0249162	0.0199096	-0.0366264	0.00616369
926.425	0.0274152	0.0278552	-0.0387073	0.0201418
926.684	0.0244778	0.0208303	-0.04159	0.022652
926.943	0.0291465	0.0255904	-0.0378272	0.020546
927.202	0.0262579	0.0265158	-0.0422974	0.00961602
927.461	0.0220296	0.0238288	-0.0466599	0.0142022
927.72	0.0198036	0.0257532	-0.0444621	0.00593472
927.979	0.0233583	0.0180255	-0.0483271	0.0223146
928.238	0.0258765	0.0210878	-0.0448604	0.0250503
928.497	0.0223287	0.0222584	-0.0498203	0.0135465
928.756	0.0277129	0.0257214	-0.0485808	0.00373565
929.016	0.0242057	0.0201114	-0.0492385	0.014034
929.275	0.0217129	0.0290976	-0.0475735	0.0177599
929.534	0.0210135	0.0249632	-0.0458264	0.0214912
929.793	0.0229291	0.0267456	-0.0492775	0.016304
930.052	0.023794	0.0290823	-0.0461255	0.0177818
930.311	0.0244717	0.0298422	-0.0535615	0.00852356
930.57	0.0256565	0.0249486	-0.0524292	-0.0016866
930.829	0.022791	0.0295762	-0.054412	-0.000386
931.088	0.0255623	0.0284056	-0.0545679	0.0065575
931.347	0.0243336	0.0296151	-0.0533559	0.00122753
931.606	0.024972	0.027578	-0.0540464	-0.0020581
931.865	0.0233996	0.0280418	-0.0545131	0.00751316
932.124	0.0229659	0.0257234	-0.0526615	1.9666e-05
932.383	0.0200641	0.0254571	-0.0533001	-0.0097839
932.642	0.0228883	0.0272336	-0.0576984	-0.0045026
932.902	0.0178449	0.0257593	-0.0634964	0.00094721
933.161	0.0160831	0.0263569	-0.0650457	0.00180763
933.42	0.0171299	0.0203341	-0.0674634	-0.0126807
933.679	0.0177595	0.0264123	-0.0637295	-0.0013449
933.938	0.0185351	0.0291527	-0.0615942	0.00124637
934.197	0.0185892	0.0227634	-0.0649159	0.00698891
934.456	0.0214881	0.036225	-0.0647305	-0.0015794
934.715	0.0215545	0.032451	-0.0647861	0.00764269
934.974	0.0212583	0.0255774	-0.0608358	-0.0050954
935.233	0.0151072	0.0282811	-0.0646321	-0.0166339
935.492	0.0185736	0.0170314	-0.0670221	-0.0078857
935.751	0.0183542	0.0312989	-0.068836	-0.0010429
936.01	0.0149651	0.0309108	-0.0717496	0.00596954
936.269	0.0114599	0.0276735	-0.0720978	-0.0089547
936.528	0.01678	0.0285258	-0.0688291	-0.0047816
936.788	0.0153194	0.026034	-0.0713566	-0.0176599
937.047	0.0173022	0.0222795	-0.0720296	-0.0091575
937.306	0.0168349	0.0279372	-0.070543	-0.0233443
937.565	0.0253167	0.0297231	-0.0685173	-0.0030162
937.824	0.0190235	0.0284722	-0.0730211	-0.0209062
938.083	0.0173387	0.0241074	-0.0728683	-0.0211976
938.342	0.0189133	0.0317779	-0.0735221	-0.032162
938.601	0.0151422	0.0330129	-0.0759539	-0.0200917
938.86	0.0216501	0.0392752	-0.0749577	-0.012096
939.119	0.0231327	0.037642	-0.0720367	-0.0171613
939.378	0.0206633	0.0294443	-0.0760572	-0.0147791
939.637	0.019824	0.0265063	-0.0740097	-0.0124046
939.896	0.0125733	0.0176921	-0.0833674	-0.0198022
940.155	0.018244	0.02496	-0.0798316	-0.0124104
940.414	0.0148032	0.0276155	-0.0806981	-0.0090077
940.674	0.0195367	0.034794	-0.0799457	-0.0217213
940.933	0.0197806	0.0231831	-0.0747699	-0.0150123
941.192	0.0306895	0.0358204	-0.074889	-0.0066949
941.451	0.0297764	0.0317117	-0.0763188	-0.0077243
941.71	0.0307782	0.0396305	-0.0744671	-0.0108556
941.969	0.0267392	0.0269951	-0.0783315	-0.0059685
942.228	0.0288673	0.0310646	-0.08165	-0.0064068
942.487	0.0317047	0.0318312	-0.0779753	-0.0184647
942.746	0.0254056	0.0317303	-0.0838767	-0.0214732
943.005	0.0369337	0.0363846	-0.0782273	-0.0054366
943.264	0.0378159	0.0387185	-0.0768196	-0.0164455
943.523	0.032611	0.0348461	-0.0794781	-0.0083864
943.782	0.0302076	0.029338	-0.0821281	-0.0069047
944.041	0.0334706	0.0293917	-0.0868685	0.00035299
944.3	0.0330272	0.0280569	-0.0870978	-0.0132967
944.56	0.0307407	0.0311541	-0.0863603	-0.0133023
944.819	0.0278468	0.0279458	-0.092076	-0.0164996
945.078	0.0272925	0.0256	-0.0911201	-0.0115956
945.337	0.027623	0.0240272	-0.0921662	-0.0142028
945.596	0.0305962	0.0222975	-0.0924529	-0.0213209
945.855	0.0314717	0.0204608	-0.0912739	-0.010579
946.114	0.0332231	0.0301142	-0.0910823	-0.023943
946.373	0.038896	0.0239756	-0.0876371	-0.018683
946.632	0.0359837	0.0233204	-0.0925244	-0.020289
946.891	0.0373584	0.0378721	-0.0921966	-0.0122993
947.15	0.0353832	0.028727	-0.0978103	-0.0132866
947.409	0.0387413	0.0308542	-0.0958495	-0.0142148
947.668	0.0374329	0.0285061	-0.0940148	-0.0152627
947.927	0.0425969	0.0364749	-0.092389	-0.0034502
948.186	0.0451927	0.038799	-0.0908672	-0.0071589
948.446	0.0402859	0.0294689	-0.092754	-0.010608
948.705	0.0471827	0.0379715	-0.0880562	-0.0019603
948.964	0.0467217	0.0335739	-0.0921388	0.00105402
949.223	0.0506552	0.0318057	-0.0921068	8.3545e-05
949.482	0.0484355	0.034539	-0.0926409	-0.0012468
949.741	0.043902	0.0373457	-0.0959833	-0.0083326
950	0.0475468	0.0367712	-0.0932089	-0.0030784
950.259	0.0464705	0.0377833	-0.094211	0.00214461
950.518	0.0426247	0.0235049	-0.100124	-0.0222149
950.777	0.0451241	0.0348656	-0.099004	-0.0037994
951.036	0.0518947	0.0380103	-0.0981491	-0.0071338
951.295	0.0446625	0.0295583	-0.101178	-0.0069966
951.554	0.0523214	0.0385251	-0.0960219	0.0027828
951.813	0.0490488	0.0302884	-0.102472	-0.0110095
952.072	0.0512092	0.0327392	-0.0968211	-0.0071363
952.332	0.0508334	0.0277946	-0.101568	0.00014916
952.591	0.0534494	0.0268414	-0.102785	-0.0153928
952.85	0.0540319	0.0289052	-0.0995603	-0.0020647
953.109	0.0563614	0.0327945	-0.101472	-0.0025019
953.368	0.0608146	0.0387484	-0.106942	-0.0022631
953.627	0.0596716	0.0356763	-0.104235	0.00292796
953.886	0.0583165	0.0297738	-0.10506	0.00912898
954.145	0.05601	0.0265774	-0.108726	0.00222287
954.404	0.0554527	0.0266773	-0.10885	-0.0073446
954.663	0.0549817	0.0281988	-0.109725	-0.0064968
954.922	0.0532594	0.0240924	-0.111738	-0.0084946
955.181	0.056302	0.0244311	-0.108333	0.0006717
955.44	0.0537948	0.023898	-0.111886	-0.0103495
955.699	0.0607809	0.0278027	-0.111872	-0.0158216
955.958	0.0613046	0.0273273	-0.111719	0.00122438
956.218	0.0614336	0.0210126	-0.111991	0.00225397
956.477	0.0621516	0.0327525	-0.107979	-0.0110424
956.736	0.0615837	0.0287369	-0.111353	-6.549e-05
956.995	0.0628461	0.0257296	-0.112633	-0.0042477
957.254	0.0685838	0.0390961	-0.113971	-0.0048787
957.513	0.0718397	0.03713	-0.109438	0.00712952
957.772	0.069161	0.0221919	-0.110825	0.00082209
958.031	0.0705207	0.0320692	-0.112537	0.00460115
958.29	0.0688304	0.0253161	-0.113963	-0.0005413
958.549	0.0712192	0.029276	-0.113895	-0.0067527
958.808	0.0727785	0.0342647	-0.112517	-0.0095602
959.067	0.0734228	0.0393436	-0.111901	0.00148595
959.326	0.0708392	0.0291694	-0.112477	0.0059209
959.585	0.0761189	0.0319947	-0.111791	0.00826077
959.844	0.0759376	0.0413178	-0.112994	0.00122849
960.104	0.0721001	0.0288265	-0.117598	-0.0020139
960.363	0.0749073	0.0323441	-0.115429	-0.0123121
960.622	0.0760411	0.0293232	-0.118014	0.00475845
960.881	0.0787735	0.0340054	-0.117961	0.00205175
961.14	0.0792257	0.030001	-0.115579	0.00749137
961.399	0.0755422	0.0278486	-0.12104	-0.0066464
961.658	0.0760635	0.0279863	-0.122687	-0.0074689
961.917	0.0742403	0.0338343	-0.120422	-0.000715
962.176	0.0805943	0.0321359	-0.118226	-0.0105287
962.435	0.0794874	0.03795	-0.117313	-0.0090316
962.694	0.079548	0.0298472	-0.120303	1.35e-05
962.953	0.0811967	0.030782	-0.118079	0.00179684
963.212	0.0813612	0.0377327	-0.120378	-0.0033468
963.471	0.0817827	0.0384751	-0.119185	0.00289301
963.73	0.0839219	0.0282325	-0.120859	-0.0108008
963.99	0.0789669	0.0389781	-0.119874	-0.0021354
964.249	0.0831096	0.039256	-0.122894	-0.0032551
964.508	0.083609	0.0316149	-0.118717	0.0103433
964.767	0.0860655	0.0326041	-0.122757	-0.0052818
965.026	0.0800754	0.0337983	-0.123203	-0.0068696
965.285	0.0815077	0.0385403	-0.126588	-0.0011059
965.544	0.0803935	0.0286841	-0.123274	0.00015889
965.803	0.0814981	0.0323477	-0.12684	-0.0071978
966.062	0.0821065	0.0418204	-0.128675	-0.0046809
966.321	0.0849126	0.0333507	-0.125777	-0.0004335
966.58	0.0813611	0.0334145	-0.12772	-0.0097556
966.839	0.08419	0.0277044	-0.127835	-0.007464
967.098	0.0881078	0.0379906	-0.125528	-0.0029876
967.357	0.0896213	0.0320079	-0.12595	-0.006446
967.616	0.0886329	0.0352371	-0.126631	-0.0078725
967.876	0.0874585	0.0386307	-0.124423	-0.0050396
968.135	0.0873739	0.0408209	-0.12752	-0.0099579
968.394	0.0894523	0.0356848	-0.125358	-0.0054282
968.653	0.087666	0.042255	-0.128293	-0.0017834
968.912	0.0894401	0.0284956	-0.128833	-0.0158843
969.171	0.0855609	0.0343923	-0.128352	-0.020644
969.43	0.087746	0.0376603	-0.129794	-0.0178569
969.689	0.0850329	0.0300955	-0.130458	-0.0128878
969.948	0.082272	0.0240202	-0.131511	-0.0213244
970.207	0.0880695	0.0336606	-0.137342	-0.0208479
970.466	0.0863947	0.026598	-0.134216	-0.0126552
970.725	0.0888229	0.0343307	-0.129423	-0.0098106
970.984	0.0864506	0.0396542	-0.130852	-0.017687
971.243	0.0898575	0.0361795	-0.130971	-0.0149005
971.502	0.0895688	0.0308966	-0.128539	-0.0104338
971.762	0.0903316	0.0317617	-0.133209	-0.0027407
972.021	0.0924657	0.0417713	-0.127598	-0.0095425
972.28	0.090611	0.036662	-0.129168	-0.0201979
972.539	0.100322	0.0399368	-0.12764	-0.0152235
972.798	0.0937834	0.0413099	-0.129917	-0.015442
973.057	0.0921726	0.0345238	-0.133467	-0.011412
973.316	0.0910947	0.0284676	-0.1328	-0.0307029
973.575	0.0960293	0.0361078	-0.134324	-0.0148087
973.834	0.0926103	0.0310239	-0.135145	-0.0107577
974.093	0.0941762	0.039793	-0.136785	-0.0150403
974.352	0.0935132	0.0350005	-0.136312	-0.017508
974.611	0.0965503	0.0322641	-0.136005	-0.0214511
974.87	0.0962909	0.0304391	-0.13969	-0.0203655
975.129	0.0910654	0.0339101	-0.138307	-0.0167592
975.388	0.0852088	0.0353634	-0.140217	-0.032573
975.648	0.0888616	0.0267951	-0.140179	-0.0209288
975.907	0.0911489	0.0392499	-0.140292	-0.0098013
976.166	0.0912294	0.0278849	-0.142069	-0.0230389
976.425	0.0957849	0.0366547	-0.137497	-0.0200798
976.684	0.0958403	0.0343549	-0.13626	-0.0169211
976.943	0.0934158	0.0355733	-0.138071	-0.0195389
977.202	0.0918379	0.0343998	-0.138993	-0.0285222
977.461	0.0967432	0.0359748	-0.142323	-0.0235769
977.72	0.088279	0.030247	-0.143936	-0.018122
977.979	0.0973152	0.0303022	-0.14507	-0.0185547
978.238	0.0953754	0.0215193	-0.141429	-0.0334881
978.497	0.0934415	0.0276569	-0.144106	-0.0284299
978.756	0.0935153	0.0388612	-0.143006	-0.0272046
979.015	0.0944448	0.0322133	-0.145301	-0.0221427
979.275	0.0955403	0.0266479	-0.144823	-0.0287797
979.534	0.0957938	0.0287055	-0.143243	-0.0217712
979.793	0.0938818	0.0250496	-0.146267	-0.0307463
980.052	0.0976766	0.026114	-0.145155	-0.0238683
980.311	0.0955884	0.0316141	-0.148331	-0.0317269
980.57	0.0963223	0.0228999	-0.145903	-0.0355713
980.829	0.0973034	0.034608	-0.147982	-0.0345593
981.088	0.102298	0.0334034	-0.145928	-0.0324061
981.347	0.105275	0.0335097	-0.145573	-0.0258263
981.606	0.105668	0.0331834	-0.145258	-0.0297402
981.865	0.104046	0.0369891	-0.143255	-0.0274964
982.124	0.106003	0.0392459	-0.145332	-0.0387043
982.383	0.103478	0.0418305	-0.146936	-0.0229409
982.642	0.102653	0.035818	-0.148889	-0.0289941
982.901	0.0993117	0.0245291	-0.148293	-0.0376878
983.161	0.101355	0.0285448	-0.148226	-0.0313302
983.42	0.095527	0.0194727	-0.154113	-0.0292333
983.679	0.0995962	0.0312976	-0.150526	-0.0330336
983.938	0.097289	0.0222521	-0.153973	-0.0435756
984.197	0.0954182	0.0185012	-0.154718	-0.0290255
984.456	0.0935363	0.0293262	-0.155331	-0.0408374
984.715	0.0918909	0.0255752	-0.157221	-0.0396348
984.974	0.0954936	0.0204527	-0.158269	-0.0391705
985.233	0.0924537	0.0229335	-0.159475	-0.047689
985.492	0.0901803	0.0244221	-0.158239	-0.0316685
985.751	0.0923394	0.026766	-0.15629	-0.0413763
986.01	0.0948357	0.0258381	-0.160117	-0.0292248
986.269	0.091933	0.015499	-0.162294	-0.0355308
986.528	0.0946974	0.0182894	-0.157033	-0.0323964
986.787	0.0902783	0.0232982	-0.163652	-0.0345489
987.047	0.0936421	0.0265797	-0.159679	-0.0425744
987.306	0.0971522	0.0303132	-0.158089	-0.0327992
987.565	0.0905358	0.0169685	-0.160729	-0.0321767
987.824	0.0920422	0.0218284	-0.161201	-0.0271029
988.083	0.0923956	0.0206632	-0.16089	-0.0425627
988.342	0.0875605	0.0212983	-0.166456	-0.0425715
988.601	0.0910746	0.0228783	-0.162262	-0.0462829
988.86	0.0923572	0.0261088	-0.165239	-0.0382131
989.119	0.0898624	0.0235001	-0.163877	-0.0369455
989.378	0.0956669	0.0279685	-0.16139	-0.0281065
989.637	0.0926632	0.0277938	-0.158871	-0.0340673
989.896	0.095358	0.0254068	-0.162486	-0.0277152
990.155	0.0943174	0.0276231	-0.161772	-0.03546
990.414	0.095246	0.0225845	-0.161945	-0.0266754
990.673	0.088281	0.018411	-0.168327	-0.0432791
990.933	0.0908882	0.0143874	-0.166837	-0.030412
991.192	0.0947021	0.0185856	-0.162213	-0.0322782
991.451	0.0886143	0.0204149	-0.170354	-0.034355
991.71	0.0887874	0.021415	-0.16821	-0.0270765
991.969	0.0929546	0.0256291	-0.164619	-0.0337899
992.228	0.0892462	0.0212439	-0.169464	-0.0362035
992.487	0.0886631	0.0196125	-0.169961	-0.0249844
992.746	0.0902875	0.0125303	-0.171842	-0.0435001
993.005	0.0884978	0.0241036	-0.169005	-0.0308727
993.264	0.0929889	0.0244433	-0.165682	-0.039865
993.523	0.0907678	0.0224784	-0.165386	-0.031268
993.782	0.0862087	0.0187753	-0.166929	-0.0441003
994.041	0.0907248	0.0263913	-0.167566	-0.0215757
994.3	0.0894012	0.0174676	-0.171415	-0.0319995
994.559	0.0884737	0.0265041	-0.17046	-0.0292366
994.819	0.0890457	0.0202512	-0.167121	-0.0306127
995.078	0.0878678	0.0210259	-0.169263	-0.0337467
995.337	0.0850776	0.017144	-0.171552	-0.0193872
995.596	0.0876162	0.0220541	-0.167828	-0.0145564
995.855	0.0862126	0.0219169	-0.169523	-0.043481
996.114	0.0926848	0.0246618	-0.168338	-0.0309602
996.373	0.0914381	0.0320987	-0.165912	-0.0395534
996.632	0.0877776	0.0203467	-0.169913	-0.0362024
996.891	0.0841602	0.0169917	-0.168329	-0.0194483
997.15	0.0847828	0.0164346	-0.170683	-0.0233852
997.409	0.0849356	0.0191535	-0.172292	-0.0239454
997.668	0.0859355	0.0168749	-0.173152	-0.0313566
997.927	0.0829774	0.0205389	-0.17136	-0.030592
998.186	0.084073	0.0260311	-0.172408	-0.0270529
998.445	0.0908266	0.0184827	-0.167073	-0.0207301
998.705	0.085982	0.0240002	-0.169381	-0.0258591
998.964	0.090323	0.0245706	-0.171895	-0.0292416
999.223	0.0886486	0.0302557	-0.168919	-0.0182773
999.482	0.0899381	0.0207712	-0.170467	-0.0260988
999.741	0.0831806	0.0226659	-0.175845	-0.0250005
1000	0.0784852	0.0183202	-0.177539	-0.0320261
1000.26	0.0837662	0.0168627	-0.174873	-0.0343551
1000.52	0.0845423	0.0145465	-0.177158	-0.0302969
1000.78	0.0837476	0.0222686	-0.177386	-0.0230606
1001.04	0.0802083	0.0137015	-0.176264	-0.0209344
1001.3	0.0786111	0.0222738	-0.175019	-0.02433
1001.55	0.0827818	0.0183648	-0.174368	-0.0219069
1001.81	0.0852473	0.0194823	-0.173043	-0.0252931
1002.07	0.0797235	0.0159842	-0.176553	-0.0325823
1002.33	0.0768309	0.0246609	-0.174126	-0.0136413
1002.59	0.0773769	0.0222563	-0.178949	-0.0315131
1002.85	0.0839005	0.0211892	-0.17602	-0.0230758
1003.11	0.0791861	0.0260005	-0.176132	-0.0187291
1003.37	0.08035	0.0220705	-0.172899	-0.0229364
1003.63	0.0828877	0.0176319	-0.177502	-0.0211399
1003.89	0.0794468	0.0261488	-0.176518	-0.0243031
1004.14	0.0782076	0.0189129	-0.178233	-0.0230154
1004.4	0.0755932	0.0155305	-0.180712	-0.0211184
1004.66	0.0756541	0.0223765	-0.177469	-0.019171
1004.92	0.0805005	0.0251173	-0.17813	-0.026833
1005.18	0.0724794	0.00997734	-0.183143	-0.0267034
1005.44	0.0721204	0.0160866	-0.183254	-0.0259571
1005.7	0.0737949	0.0127353	-0.186582	-0.0303963
1005.96	0.0733216	0.00959527	-0.18538	-0.0366526
1006.22	0.0720561	0.0215763	-0.179644	-0.0278501
1006.48	0.0713917	0.0228375	-0.185426	-0.0254995
1006.74	0.0745291	0.0129358	-0.181825	-0.0327425
1006.99	0.0779734	0.0192581	-0.179941	-0.0317297
1007.25	0.0754887	0.0141094	-0.180294	-0.0245057
1007.51	0.077527	0.0191845	-0.180728	-0.0193343
1007.77	0.0794409	0.021571	-0.179468	-0.0131537
1008.03	0.0798663	0.0201067	-0.180664	-0.0244841
1008.29	0.0878147	0.0271022	-0.175685	-0.0150411
1008.55	0.0818599	0.0227478	-0.182099	-0.0118842
1008.81	0.0804022	0.0133951	-0.181702	-0.021567
1009.07	0.0812661	0.0200907	-0.179757	-0.0043562
1009.33	0.0786943	0.0163924	-0.178266	-0.0211123
1009.59	0.0747912	0.00956608	-0.183995	-0.0196454
1009.84	0.0790874	0.01834	-0.182305	-0.0176379
1010.1	0.0730902	0.00908507	-0.188085	-0.0208519
1010.36	0.0782625	0.0194358	-0.181426	-0.0192823
1010.62	0.0777212	0.0173212	-0.182793	-0.0191547
1010.88	0.0754987	0.0187541	-0.186097	-0.0234765
1011.14	0.0695335	0.0132534	-0.189349	-0.0191262
1011.4	0.067263	-0.0004972	-0.189876	-0.0277687
1011.66	0.0705453	0.0134453	-0.188533	-0.0200766
1011.92	0.0721269	0.0208517	-0.184894	-0.0026517
1012.18	0.0729727	0.00916173	-0.188725	-0.0146267
1012.44	0.075601	0.0152789	-0.18722	0.0040967
1012.69	0.071963	0.0126669	-0.184961	-0.0163103
1012.95	0.0700994	0.018414	-0.188894	-0.0200186
1013.21	0.0741857	0.0105497	-0.187158	-0.0030274
1013.47	0.0764924	0.0231818	-0.186824	-0.0051344
1013.73	0.071469	0.0167872	-0.185116	-0.0099101
1013.99	0.0725357	0.0172863	-0.188363	-0.0097862
1014.25	0.0740732	0.00794624	-0.190104	-0.003309
1014.51	0.0710635	0.0112339	-0.192963	-0.0049081
1014.77	0.0725007	0.0175487	-0.191388	-0.0114045
1015.03	0.0694787	0.0115191	-0.189514	-0.0112664
1015.28	0.0705107	0.0133467	-0.191116	-0.0023062
1015.54	0.0726655	0.0152208	-0.189054	-0.0082504
1015.8	0.0689592	0.0136361	-0.188883	0.00291831
1016.06	0.0729302	0.00915539	-0.189682	0.00286768
1016.32	0.073806	0.0179872	-0.187916	-0.0022323
1016.58	0.0757021	0.0217423	-0.185461	0.00321393
1016.84	0.0750903	0.0141086	-0.186844	-0.0011596
1017.1	0.0765091	0.0186425	-0.187095	-0.0063861
1017.36	0.0734757	0.00800743	-0.189025	-0.0062094
1017.62	0.0738854	0.0166689	-0.188255	0.00331307
1017.88	0.0737871	0.0227571	-0.190841	-0.003598
1018.13	0.0684184	0.0121652	-0.192044	-0.0026253
1018.39	0.072813	0.00910415	-0.192056	-0.002785
1018.65	0.0686691	0.0116929	-0.191412	0.00701332
1018.91	0.066983	0.0138271	-0.190069	-0.0006475
1019.17	0.0646862	0.0102336	-0.193399	0.00217361
1019.43	0.0648404	0.0073025	-0.196268	-0.0068115
1019.69	0.0659547	0.00753505	-0.195723	-0.0060113
1019.95	0.0592065	0.00387956	-0.199865	-0.0076783
1020.21	0.066151	0.0025948	-0.195953	-0.0023039
1020.47	0.0685181	0.0127336	-0.19653	-0.0035053
1020.73	0.0643411	0.00221683	-0.197809	-0.0061244
1020.98	0.0666407	0.00119391	-0.196823	-0.0023027
1021.24	0.0607257	0.0101766	-0.201738	-0.002251
1021.5	0.0593429	0.00714794	-0.195927	-0.0057039
1021.76	0.0574105	-0.0047615	-0.202185	-0.0073315
1022.02	0.0545099	-0.0041073	-0.203062	-0.0143013
1022.28	0.0553985	0.00200787	-0.202835	0.0103649
1022.54	0.0502142	0.00128481	-0.206244	-0.008102
1022.8	0.050072	-0.010771	-0.20766	0.00175527
1023.06	0.0497648	-0.005247	-0.205933	-0.0071739
1023.32	0.0503532	-0.001843	-0.206988	-0.0198534
1023.57	0.0518143	-0.0063124	-0.20692	-0.0133736
1023.83	0.0516537	-0.0016632	-0.203625	-0.0010147
1024.09	0.0556149	-0.0001669	-0.205241	-0.0123792
1024.35	0.0487099	-0.0024855	-0.207127	-0.0068593
1024.61	0.0518606	0.00017923	-0.205894	-0.0060911
1024.87	0.0469628	-0.0049907	-0.206894	-0.0063379
1025.13	0.0523774	-0.0031824	-0.204879	-0.014845
1025.39	0.0456006	-0.0097185	-0.207144	-0.0105656
1025.65	0.0491839	-0.0064484	-0.205328	-0.007921
1025.91	0.0532425	0.00406246	-0.202789	0.00424648
1026.17	0.0534701	-0.0006484	-0.201664	-0.0101332
1026.42	0.0542848	0.00698201	-0.202447	-0.0017662
1026.68	0.0539739	0.00658722	-0.203819	0.00896585
1026.94	0.0517119	0.00449269	-0.201108	-0.0023989
1027.2	0.0513703	-0.0025421	-0.206357	-8.246e-05
1027.46	0.0529929	0.00839987	-0.202728	-0.0087727
1027.72	0.0575574	0.0086578	-0.201647	-0.0072001
1027.98	0.0561034	0.00796881	-0.199026	-0.0004089
1028.24	0.051743	-0.0014642	-0.201748	-0.0003638
1028.5	0.0540651	0.00205323	-0.202857	0.00953858
1028.76	0.0514339	0.00804425	-0.204597	0.00122693
1029.02	0.0499669	-0.0030339	-0.203217	-0.0066048
1029.27	0.0521329	-0.0040436	-0.203601	-0.0014358
1029.53	0.0503872	0.00308714	-0.20267	0.00595296
1029.79	0.0474123	0.00239237	-0.205855	0.0121722
1030.05	0.0535702	0.00741698	-0.200762	0.0134658
1030.31	0.0542005	0.00423218	-0.197461	0.0137173
1030.57	0.0495735	0.00342919	-0.202299	0.0118994
1030.83	0.0491447	-0.0004983	-0.204858	0.00820408
1031.09	0.048319	0.0037279	-0.202136	0.00900932
1031.35	0.0460904	0.00163984	-0.205264	0.00797837
1031.61	0.0540347	0.00951447	-0.198904	0.010556
1031.87	0.051374	0.0118504	-0.202084	0.00769851
1032.12	0.0481214	0.00255567	-0.202897	0.0211231
1032.38	0.0463849	0.0092163	-0.205399	0.00663359
1032.64	0.0431912	-0.0054087	-0.204303	-0.0018674
1032.9	0.0431878	0.00374155	-0.207025	0.0106642
1033.16	0.0466374	0.00762494	-0.204384	0.016602
1033.42	0.0481647	0.0045235	-0.203774	0.0173056
1033.68	0.0468623	0.0122879	-0.205237	0.0199356
1033.94	0.0466572	0.0134852	-0.205028	0.0217276
1034.2	0.0476292	0.00251057	-0.204239	0.0227234
1034.46	0.041356	-0.0002523	-0.208204	0.0106987
1034.71	0.0372945	-0.0046323	-0.21115	0.0108828
1034.97	0.0341513	-0.002455	-0.211048	0.00092412
1035.23	0.03894	-0.0034842	-0.212361	0.00622617
1035.49	0.0370637	0.00255776	-0.208803	0.00205985
1035.75	0.0376054	-0.0071497	-0.211793	0.0118722
1036.01	0.0392784	-0.0071555	-0.21275	0.00649991
1036.27	0.0379651	-0.0056466	-0.209589	0.0149088
1036.53	0.0356803	-0.001896	-0.208023	0.0095851
1036.79	0.042499	0.00375375	-0.20373	0.0208899
1037.05	0.0400627	0.0008937	-0.203365	0.0183184
1037.31	0.0408127	0.00482504	-0.206764	0.0166748
1037.56	0.0388891	-0.0056925	-0.206855	0.0201343
1037.82	0.0352868	-0.0018891	-0.211711	0.0177599
1038.08	0.0345241	-0.006155	-0.208992	0.0249931
1038.34	0.0355365	-0.0039564	-0.211558	0.0302923
1038.6	0.0392003	-0.0092076	-0.209452	0.0168505
1038.86	0.0349055	-0.0009958	-0.210635	0.0145774
1039.12	0.0340575	-0.0021823	-0.209929	0.0255814
1039.38	0.0378974	-0.0034425	-0.211675	0.0203795
1039.64	0.0326175	0.00189216	-0.212012	0.0197131
1039.9	0.035203	0.00509848	-0.208879	0.0208528
1040.16	0.031962	-0.0023302	-0.209457	0.0210492
1040.41	0.034102	-0.0042336	-0.213079	0.0266798
1040.67	0.0334231	-0.001425	-0.213999	0.015478
1040.93	0.0297626	-0.0041807	-0.212831	0.0192288
1041.19	0.0319958	-0.0058434	-0.210165	0.011609
1041.45	0.0308661	-0.0046718	-0.211675	0.0172414
1041.71	0.0283854	-0.0098636	-0.208555	0.0207895
1041.97	0.0304095	-0.0079555	-0.210992	0.0221422
1042.23	0.0308262	-0.0115632	-0.209034	0.0205606
1042.49	0.0253158	-0.0122398	-0.215579	0.0155502
1042.75	0.0277785	-0.0110077	-0.215159	0.0198274
1043	0.0235402	-0.0114862	-0.219683	0.00226543
1043.26	0.0262839	-0.0037213	-0.214557	0.00959014
1043.52	0.0226732	-0.0145881	-0.21783	0.0211022
1043.78	0.0276076	-0.0098599	-0.213857	0.0334644
1044.04	0.0275035	-0.0094349	-0.212929	0.0302351
1044.3	0.0246068	-0.0085987	-0.217637	0.0325083
1044.56	0.0234045	-0.0182544	-0.217725	0.0174661
1044.82	0.0234534	-0.0124449	-0.216574	0.0201002
1045.08	0.0226924	-0.0218997	-0.214776	0.0250873
1045.34	0.0224861	-0.0074879	-0.219676	0.0223476
1045.6	0.0252599	-0.0108201	-0.214697	0.0205615
1045.85	0.0210401	-0.0136231	-0.219245	0.0250681
1046.11	0.0188953	-0.0114959	-0.217672	0.0221796
1046.37	0.0193672	-0.0146578	-0.217554	0.0201849
1046.63	0.025152	-0.006735	-0.2154	0.0290625
1046.89	0.0236398	-0.0137567	-0.21743	0.0232321
1047.15	0.0192809	-0.0042111	-0.218372	0.0217127
1047.41	0.0198084	-0.0143298	-0.215845	0.0288225
1047.67	0.0217537	-0.0095815	-0.21586	0.0242254
1047.93	0.0164199	-0.0087599	-0.216552	0.0251484
1048.19	0.0211252	-0.0087159	-0.217966	0.0234791
1048.45	0.0230735	-0.0068797	-0.216802	0.0302703
1048.7	0.0193404	-0.0163579	-0.216823	0.0401826
1048.96	0.0211123	-0.0130852	-0.215499	0.0285787
1049.22	0.0204856	-0.0062117	-0.219189	0.0360764
1049.48	0.017994	-0.0039905	-0.218911	0.0332088
1049.74	0.0209587	-0.0034929	-0.216789	0.0367563
1050	0.0174417	-0.0152526	-0.217457	0.0237439
1050.26	0.017285	-0.0157402	-0.221633	0.00110953
1050.52	0.0164953	-0.0099907	-0.220187	0.00103285
1050.78	0.0139885	-0.014424	-0.222632	-0.0027333
1051.04	0.0169481	-0.0140746	-0.220409	0.00749507
1051.3	0.015999	-0.0149513	-0.218263	0.00216486
1051.55	0.0125878	-0.0185003	-0.220394	0.00807819
1051.81	0.01639	-0.0192955	-0.22121	0.01549
1052.07	0.0190353	-0.0198867	-0.220542	0.0156294
1052.33	0.0153075	-0.0234541	-0.218366	0.00283713
1052.59	0.0180317	-0.0178448	-0.2204	0.00287119
1052.85	0.0130225	-0.0129111	-0.220724	0.0186177
1053.11	0.0112864	-0.0218044	-0.221462	0.0067499
1053.37	0.0145615	-0.0110058	-0.221771	0.0106044
1053.63	0.00979712	-0.0187207	-0.221357	0.00566305
1053.89	0.0100348	-0.0079116	-0.225609	0.0166994
1054.14	0.0121843	-0.0152867	-0.224759	0.00399264
1054.4	0.0146578	-0.0204807	-0.221405	0.0129363
1054.66	0.0138063	-0.0125336	-0.219692	0.00656989
1054.92	0.0115086	-0.0143078	-0.224456	0.00917382
1055.18	0.00729727	-0.0161114	-0.224789	0.00591676
1055.44	0.00806634	-0.0201024	-0.224445	0.00583714
1055.7	0.0101679	-0.0117169	-0.222529	0.00778934
1055.96	0.00585449	-0.0188556	-0.228797	0.00985135
1056.22	0.012124	-0.0205828	-0.226442	-0.0011284
1056.48	0.0116936	-0.0178646	-0.221416	0.00972402
1056.74	0.0118631	-0.0188306	-0.223209	0.00243585
1056.99	0.00836839	-0.0237389	-0.224232	0.0109562
1057.25	0.0136376	-0.0135937	-0.221973	0.0127415
1057.51	0.0120972	-0.0133298	-0.224114	0.0192734
1057.77	0.00734922	-0.0172131	-0.224431	0.00692228
1058.03	0.00877336	-0.0200102	-0.224223	1.3745e-05
1058.29	0.00601864	-0.0151276	-0.226392	0.00740118
1058.55	0.00613161	-0.0163923	-0.227154	0.00521663
1058.81	0.00603825	-0.0117473	-0.224404	0.0102468
1059.07	0.00445885	-0.0140781	-0.227571	0.00427454
1059.33	0.00038578	-0.0248408	-0.228586	0.00602779
1059.59	0.00465607	-0.0152518	-0.226557	-0.0044958
1059.84	0.0042988	-0.0190448	-0.227671	0.0206078
1060.1	0.00683031	-0.0142858	-0.224274	0.0246331
1060.36	0.0103552	-0.0192818	-0.225006	0.0169983
1060.62	0.00927555	-0.0240804	-0.223087	-0.0060295
1060.88	0.00232125	-0.0212832	-0.229739	0.0165465
1061.14	0.00678049	-0.0154209	-0.224564	0.0130625
1061.4	-0.0008898	-0.0177698	-0.230678	0.0103464
1061.66	0.0028971	-0.0238535	-0.227382	0.0143065
1061.92	0.00180704	-0.0213743	-0.227332	0.0136648
1062.18	0.00086282	-0.0214205	-0.229312	0.00044895
1062.44	0.00134991	-0.023789	-0.228786	0.00695931
1062.69	0.0022005	-0.0257561	-0.229988	0.0127117
1062.95	0.00525433	-0.0220285	-0.227007	0.0276883
1063.21	0.00780972	-0.0234667	-0.221951	-0.0011491
1063.47	0.00766164	-0.01318	-0.224934	0.0159425
1063.73	0.00424697	-0.0188918	-0.228097	0.0126834
1063.99	0.00463563	-0.0258547	-0.226827	0.0173884
1064.25	0.00159901	-0.0231936	-0.230802	0.00892193
1064.51	-0.0024393	-0.0289079	-0.227041	0.0104846
1064.77	0.00135679	-0.0236664	-0.230177	0.0171463
1065.03	-0.0041965	-0.0284117	-0.233844	-0.0075318
1065.28	-0.0053492	-0.0242384	-0.234821	0.0132718
1065.54	-0.0024484	-0.0200156	-0.232481	0.00885636
1065.8	-0.0106324	-0.0312604	-0.236281	0.0176414
1066.06	-0.0051868	-0.0277925	-0.234106	0.0156143
1066.32	-0.0032191	-0.0244248	-0.231742	0.00548657
1066.58	-0.0061724	-0.0300623	-0.230686	0.0142747
1066.84	0.00182101	-0.0223136	-0.230145	0.0105388
1067.1	-0.0083577	-0.027714	-0.234664	0.00250897
1067.36	-0.0094912	-0.0335543	-0.238931	0.00789175
1067.62	-0.0156532	-0.0340907	-0.239659	0.00523747
1067.88	-0.0120507	-0.0282861	-0.237563	0.0121551
1068.13	-0.0104517	-0.030529	-0.240011	0.00991105
1068.39	-0.0137991	-0.0358425	-0.242332	-0.0181535
1068.65	-0.011564	-0.0382118	-0.239306	0.00390263
1068.91	-0.0105762	-0.0358507	-0.23744	-0.0034364
1069.17	-0.0048772	-0.0256752	-0.234789	0.00321171
1069.43	-0.0060922	-0.02819	-0.236096	0.0149135
1069.69	-0.0115097	-0.0349432	-0.24158	-0.0060563
1069.95	-0.0142417	-0.0295678	-0.239921	-0.0031051
1070.21	-0.0149466	-0.03426	-0.23813	0.00207462
1070.47	-0.0126473	-0.0396251	-0.241982	-0.004029
1070.73	-0.0142108	-0.0360585	-0.241481	-0.0030654
1070.98	-0.0105115	-0.0392149	-0.243975	-0.0082089
1071.24	-0.0184203	-0.0395206	-0.242419	0.00137371
1071.5	-0.0121418	-0.0382242	-0.24036	0.00826384
1071.76	-0.0130741	-0.0421979	-0.241953	0.00231293
1072.02	-0.0142915	-0.0454669	-0.241331	0.00033719
1072.28	-0.0140958	-0.04083	-0.241527	0.00304383
1072.54	-0.014954	-0.0379861	-0.241818	-0.0100055
1072.8	-0.0101794	-0.0227414	-0.239019	0.00844207
1073.06	-0.0091384	-0.0422994	-0.240588	0.00613034
1073.32	-0.0103363	-0.0383616	-0.238889	0.00751359
1073.57	-0.0144182	-0.0409769	-0.246738	0.00896757
1073.83	-0.0195749	-0.0379508	-0.247764	0.00681498
1074.09	-0.0151554	-0.0444081	-0.247504	-0.0151709
1074.35	-0.0183358	-0.0416385	-0.244026	-0.0090792
1074.61	-0.0178198	-0.0372017	-0.243063	-0.0016389
1074.87	-0.0152938	-0.05078	-0.243984	0.00246148
1075.13	-0.0182261	-0.0372243	-0.245528	-0.003179
1075.39	-0.0173599	-0.0427925	-0.245531	-0.0006748
1075.65	-0.0206396	-0.0482784	-0.243583	-0.0090276
1075.91	-0.0161067	-0.0400911	-0.242516	-0.0088446
1076.17	-0.0207616	-0.04265	-0.247859	-0.0153945
1076.42	-0.0190429	-0.0419781	-0.2462	-0.0020335
1076.68	-0.0173363	-0.0469032	-0.246653	0.00499885
1076.94	-0.018181	-0.0477087	-0.247773	0.00557586
1077.2	-0.0179639	-0.0420402	-0.248463	-0.0061751
1077.46	-0.0201228	-0.0401911	-0.245628	-0.0041175
1077.72	-0.0210408	-0.0453659	-0.24987	-0.0048277
1077.98	-0.0226334	-0.041982	-0.253433	0.00034524
1078.24	-0.0190493	-0.0444399	-0.248111	0.00161765
1078.5	-0.0203771	-0.0458611	-0.250688	-0.0029833
1078.76	-0.027904	-0.0519381	-0.251809	-0.01061
1079.02	-0.019146	-0.0561863	-0.248889	-0.0056605
1079.27	-0.0197451	-0.0485455	-0.246328	-0.0010321
1079.53	-0.0186877	-0.0468472	-0.24686	-0.0124463
1079.79	-0.0218993	-0.0496199	-0.249556	-0.0073705
1080.05	-0.0254223	-0.046339	-0.253258	-0.0125304
1080.31	-0.0238327	-0.0489378	-0.250522	-0.0093356
1080.57	-0.0260001	-0.0571432	-0.252898	-0.0016357
1080.83	-0.0239293	-0.0499392	-0.249784	-0.0151101
1081.09	-0.025517	-0.0521479	-0.250173	-0.0139632
1081.35	-0.0263004	-0.0533902	-0.252879	-0.0105946
1081.61	-0.0228722	-0.0567069	-0.251261	-0.0162157
1081.87	-0.0281437	-0.0537241	-0.253776	-0.0209377
1082.12	-0.0271969	-0.0519731	-0.254345	-0.0155891
1082.38	-0.0259734	-0.047426	-0.251782	-0.0108413
1082.64	-0.0267682	-0.0562015	-0.252162	-0.0087718
1082.9	-0.029394	-0.0637039	-0.256411	-0.008381
1083.16	-0.0288679	-0.0559782	-0.2539	-0.0172045
1083.42	-0.027554	-0.0529157	-0.251082	-0.0130685
1083.68	-0.0244197	-0.057659	-0.253441	-0.0198348
1083.94	-0.0265127	-0.0602265	-0.255405	-0.0132152
1084.2	-0.0267415	-0.0503995	-0.253775	-0.0061265
1084.46	-0.0307576	-0.062464	-0.25819	-0.0225285
1084.71	-0.0317131	-0.0556914	-0.258454	-0.013279
1084.97	-0.0272203	-0.0498015	-0.257777	-0.0144258
1085.23	-0.0291279	-0.0539093	-0.255705	-0.0197201
1085.49	-0.0285426	-0.0542482	-0.254327	-0.0061125
1085.75	-0.0284937	-0.056583	-0.257103	-0.0091063
1086.01	-0.0313393	-0.0631516	-0.256817	-0.0131209
1086.27	-0.0324813	-0.0651048	-0.257094	-0.0232473
1086.53	-0.0343652	-0.0611097	-0.258026	-0.0093719
1086.79	-0.028613	-0.0615814	-0.255666	-0.0182394
1087.05	-0.0269055	-0.0595502	-0.25266	-0.0032986
1087.31	-0.032564	-0.0544073	-0.256302	-0.0181615
1087.56	-0.0240947	-0.0635949	-0.254752	-0.0015155
1087.82	-0.026662	-0.0602553	-0.253589	-0.004341
1088.08	-0.0272534	-0.0551222	-0.253281	-0.0063834
1088.34	-0.0299617	-0.0605441	-0.256949	-0.0082173
1088.6	-0.0270341	-0.0600919	-0.257005	-0.0149241
1088.86	-0.0263295	-0.0600055	-0.255605	-0.0061719
1089.12	-0.0315546	-0.06101	-0.256851	0.00431469
1089.38	-0.0356123	-0.0617402	-0.259637	-0.0062601
1089.64	-0.0332925	-0.0708422	-0.256006	-0.015612
1089.9	-0.033975	-0.0693948	-0.257105	-0.0157037
1090.16	-0.0341623	-0.0620017	-0.255947	-0.0166804
1090.41	-0.033846	-0.063103	-0.254498	-0.0202209
1090.67	-0.0323049	-0.0685063	-0.25415	-0.0118425
1090.93	-0.0303201	-0.0626562	-0.254271	-0.0151516
1091.19	-0.0286084	-0.0654818	-0.257126	-0.0180519
1091.45	-0.0309398	-0.0636747	-0.256382	-0.0156942
1091.71	-0.0303905	-0.0601222	-0.256398	-0.0201869
1091.97	-0.0328539	-0.062329	-0.257537	-0.0156895
1092.23	-0.0347984	-0.0637049	-0.254919	-0.0243571
1092.49	-0.0359149	-0.0684949	-0.255866	-0.0256995
1092.75	-0.0288995	-0.0661861	-0.256048	-0.0236929
1093	-0.0338346	-0.0651749	-0.260707	-0.0160183
1093.26	-0.0393555	-0.0666691	-0.261814	-0.0311571
1093.52	-0.0375782	-0.0780062	-0.259866	-0.0218427
1093.78	-0.0347383	-0.0710396	-0.257904	-0.0290201
1094.04	-0.04212	-0.0791491	-0.262108	-0.0287225
1094.3	-0.0358502	-0.0658584	-0.260571	-0.02779
1094.56	-0.0396697	-0.0731501	-0.262872	-0.0162969
1094.82	-0.0404651	-0.0734284	-0.261702	-0.0312719
1095.08	-0.0407024	-0.0704912	-0.261283	-0.0233009
1095.34	-0.039317	-0.0788501	-0.260286	-0.0287053
1095.6	-0.037054	-0.0734594	-0.261455	-0.0295759
1095.85	-0.0327501	-0.0698006	-0.260837	-0.0283154
1096.11	-0.039548	-0.0753312	-0.263233	-0.0308005
1096.37	-0.0380686	-0.0819618	-0.261433	-0.0304496
1096.63	-0.0409063	-0.082856	-0.266077	-0.0258155
1096.89	-0.0436873	-0.0845845	-0.262018	-0.0361579
1097.15	-0.0413468	-0.0845994	-0.265713	-0.0263481
1097.41	-0.0456799	-0.0849894	-0.264851	-0.0314602
1097.67	-0.0460304	-0.0849044	-0.265198	-0.0226976
1097.93	-0.0436801	-0.088775	-0.262586	-0.0283689
1098.19	-0.0389744	-0.0798235	-0.259416	-0.0317016
1098.45	-0.0440427	-0.0829507	-0.265018	-0.0255177
1098.7	-0.0381333	-0.0790115	-0.262664	-0.0304652
1098.96	-0.0352145	-0.0752699	-0.256438	-0.0266202
1099.22	-0.0374018	-0.0780523	-0.258953	-0.0289382
1099.48	-0.036639	-0.0733361	-0.257971	-0.0316815
1099.74	-0.0375672	-0.0769867	-0.258341	-0.0339517
1100	-0.0383739	-0.0748556	-0.259225	-0.0377922
1100.26	-0.0391866	-0.0802744	-0.261878	-0.0345394
1100.52	-0.040223	-0.0796708	-0.261046	-0.0295463
1100.78	-0.0394618	-0.0760688	-0.26182	-0.0242296
1101.04	-0.0397288	-0.0826919	-0.2616	-0.0297302
1101.3	-0.0408109	-0.0846311	-0.260222	-0.026587
1101.55	-0.0438658	-0.0842067	-0.263769	-0.033231
1101.81	-0.0424414	-0.0796401	-0.263266	-0.0396168
1102.07	-0.0398191	-0.0817993	-0.261803	-0.0282474
1102.33	-0.0409477	-0.0763195	-0.257669	-0.0261207
1102.59	-0.0392119	-0.085183	-0.261445	-0.0314599
1102.85	-0.0383158	-0.0830571	-0.25508	-0.0338311
1103.11	-0.0404149	-0.0848594	-0.263286	-0.0231382
1103.37	-0.0448738	-0.0835127	-0.262553	-0.0329983
1103.63	-0.0427405	-0.0855831	-0.26218	-0.0366062
1103.89	-0.0397935	-0.0866026	-0.259155	-0.0411245
1104.14	-0.043859	-0.0839962	-0.263109	-0.0335299
1104.4	-0.0405668	-0.0860651	-0.259745	-0.0361346
1104.66	-0.0425947	-0.0868159	-0.261134	-0.0378714
1104.92	-0.0404305	-0.0913441	-0.260838	-0.0298064
1105.18	-0.0459536	-0.0912862	-0.262018	-0.0409274
1105.44	-0.0427384	-0.0938877	-0.261415	-0.0390716
1105.7	-0.0442867	-0.0927967	-0.259978	-0.0440193
1105.96	-0.043816	-0.0934416	-0.261035	-0.0401372
1106.22	-0.0429703	-0.0838951	-0.25867	-0.0374679
1106.48	-0.0432239	-0.083772	-0.263703	-0.0398539
1106.74	-0.0423556	-0.0940187	-0.261738	-0.0376485
1106.99	-0.0383721	-0.0837247	-0.259905	-0.0455964
1107.25	-0.0464091	-0.0855248	-0.265488	-0.0507531
1107.51	-0.0467145	-0.0942116	-0.263163	-0.0446604
1107.77	-0.0443082	-0.0932666	-0.263323	-0.0397893
1108.03	-0.0440221	-0.090922	-0.261052	-0.0415888
1108.29	-0.0419935	-0.0856579	-0.262078	-0.0388808
1108.55	-0.0415958	-0.0852806	-0.258835	-0.0495822
1108.81	-0.0407298	-0.0813415	-0.25977	-0.0291023
1109.07	-0.0407493	-0.0880516	-0.260205	-0.0442363
1109.33	-0.044302	-0.0842928	-0.261846	-0.0388091
1109.59	-0.0369312	-0.092458	-0.263064	-0.0356931
1109.84	-0.0429083	-0.0939279	-0.261704	-0.0430347
1110.1	-0.0407278	-0.0869383	-0.259469	-0.0396976
1110.36	-0.0459716	-0.0877459	-0.264384	-0.0402048
1110.62	-0.0387992	-0.0905677	-0.26338	-0.0415507
1110.88	-0.0432539	-0.0843795	-0.262034	-0.0401081
1111.14	-0.0415192	-0.084982	-0.259793	-0.042192
1111.4	-0.0411992	-0.089518	-0.262931	-0.0339033
1111.66	-0.0374682	-0.0876861	-0.258247	-0.0252808
1111.92	-0.0377692	-0.0868021	-0.259223	-0.030976
1112.18	-0.0382186	-0.0873795	-0.260086	-0.0317947
1112.43	-0.0411163	-0.0854676	-0.259366	-0.0375678
1112.69	-0.0400332	-0.0925422	-0.26334	-0.045174
1112.95	-0.0451478	-0.0957227	-0.265323	-0.0419135
1113.21	-0.0422665	-0.0921022	-0.26125	-0.0339851
1113.47	-0.0430709	-0.0878319	-0.262052	-0.0490495
1113.73	-0.0415381	-0.0952557	-0.262438	-0.0385225
1113.99	-0.0488318	-0.0946682	-0.265387	-0.0486034
1114.25	-0.0457144	-0.0988526	-0.264359	-0.0430687
1114.51	-0.047367	-0.0895182	-0.265197	-0.0530644
1114.77	-0.0460566	-0.100459	-0.265587	-0.0353056
1115.03	-0.0478456	-0.0851711	-0.267058	-0.037729
1115.28	-0.0454094	-0.0955882	-0.264006	-0.0472761
1115.54	-0.0417312	-0.0877601	-0.256997	-0.0415943
1115.8	-0.0374362	-0.0951628	-0.260571	-0.0298902
1116.06	-0.0394388	-0.0824592	-0.256003	-0.0320499
1116.32	-0.0373776	-0.0888563	-0.259572	-0.02439
1116.58	-0.0375824	-0.0815636	-0.258287	-0.0451747
1116.84	-0.0385645	-0.0851229	-0.261409	-0.0348026
1117.1	-0.0424806	-0.0865006	-0.259682	-0.0327136
1117.36	-0.0409988	-0.0858244	-0.260119	-0.0338642
1117.62	-0.0423141	-0.0900773	-0.260843	-0.0420316
[truncated: 318 more rows]

## Sheet: Figure 2K
	▵F/F0
Time(s)	C1	C2	C3
0.628	-0.0493809	0.0152042	-0.039329
1.18	-0.0200213	-0.0037079	-0.0330838
1.732	-0.0262995	0.017065	-0.030956
2.284	-0.0093189	-0.0111699	-0.0349092
2.836	-0.0410494	0.00783551	-0.0380899
3.388	-0.0513676	0.00331925	-0.023022
3.94	-0.0262517	0.0193937	-0.0260407
4.492	-0.056432	-0.0089093	-0.0203172
5.044	-0.0348276	-0.0112289	-0.0246971
5.596	-0.0075953	0.00519665	-0.0138311
6.148	-0.0004364	-0.0111607	-0.0182844
6.7	-0.0016748	-0.0261435	-0.0038333
7.252	-0.0341907	-0.0339365	-0.014277
7.804	-0.0073393	0.00071385	-0.0103006
8.356	0.00500619	0.00561547	-0.0161981
8.908	0.025843	0.00344809	-0.020212
9.46	0.0228181	-0.0281774	-0.0102227
10.012	-0.0246923	0.00283401	-0.0134782
10.564	-0.0264695	-0.0020987	-0.0066043
11.116	-0.0003052	0.0149141	-0.0061588
11.668	0.0078295	0.00524122	-0.0087915
12.22	0.00235208	-0.0090248	0.0064137
12.772	0.00158427	-0.0016683	-0.0041197
13.324	0.00220179	0.0240953	0.00336791
13.876	0.00500619	-0.0089643	0.00072113
14.428	0.0178027	-0.0138629	0.00469803
14.98	0.0054604	0.00260466	0.0120406
15.532	0.0381778	-0.0018401	0.0166796
16.084	0.0210908	0.0104357	0.0203846
16.636	0.0430755	0.0196673	0.0281334
17.188	0.0387654	0.00562437	0.0266683
17.74	0.0112191	-0.0062681	0.0342515
18.292	0.0139779	0.0155343	0.0365209
18.844	-0.0070784	-0.0209549	0.0381742
19.396	0.0129224	0.0132153	0.0502033
19.948	0.0183411	-0.0009079	0.0548173
20.5	0.00295813	0.00133773	0.0575605
21.052	0.0602171	-0.0058268	0.0605682
21.604	0.0173987	0.00593958	0.0645913
22.156	0.0253066	0.00152277	0.070164
22.708	0.00677077	-0.0128768	0.0754721
23.26	0.0625943	-0.0132003	0.0605343
23.812	0.0868041	0.0201242	0.0758643
24.364	0.0100575	0.00628839	0.0915002
24.916	0.0628735	-0.0282212	0.0904014
25.468	0.0103463	-0.0208836	0.0875097
26.02	0.00761832	-0.0011589	0.114778
26.572	0.097615	-0.0012419	0.108859
27.124	0.0909952	-0.0009909	0.12216
27.676	0.0946293	-0.0080371	0.122111
28.228	0.0710968	-0.0084144	0.129032
28.78	0.0799088	-0.0092712	0.13022
29.332	0.109323	-0.0060941	0.142019
29.884	0.109312	-0.0121881	0.133274
30.436	0.108837	0.00100889	0.143891
30.988	0.120103	-0.0010594	0.14649
31.54	0.106147	-0.0021775	0.139722
32.092	0.109958	-0.0069678	0.142099
32.644	0.109598	-0.0231881	0.14053
33.196	0.126234	0.00528608	0.144978
33.748	0.106644	0.00493722	0.153091
34.3	0.109564	0.00239411	0.164306
34.852	0.117188	0.0201259	0.152729
35.404	0.10559	0.0249233	0.1661
35.956	0.104693	0.0040489	0.171215
36.508	0.125285	0.0340867	0.16872
37.06	0.110797	0.114754	0.162639
37.612	0.119247	0.0930861	0.162029
38.164	0.239185	0.0790311	0.175388
38.716	0.241635	0.0921926	0.180678
39.268	0.246481	0.0958375	0.178304
39.82	0.245939	0.0621399	0.179243
40.372	0.268756	0.0887803	0.186105
40.924	0.258985	0.109129	0.183993
41.476	0.254165	0.124982	0.18869
42.028	0.270956	0.119574	0.190869
42.58	0.296666	0.104086	0.193841
43.132	0.278829	0.10356	0.188281
43.684	0.293549	0.1311	0.188036
44.236	0.297242	0.135887	0.198199
44.788	0.315316	0.166579	0.19588
45.34	0.316161	0.159236	0.199923
45.892	0.327214	0.184158	0.19892
46.444	0.325628	0.181561	0.202646
46.996	0.354707	0.19293	0.198973
47.548	0.36577	0.215528	0.20714
48.1	0.354886	0.19293	0.209702
48.652	0.336135	0.218322	0.206524
49.204	0.430511	0.214868	0.209371
49.756	0.430565	0.218616	0.205642
50.308	0.459919	0.247355	0.207526
50.86	0.478877	0.247156	0.199747
51.412	0.494536	0.259755	0.207481
51.964	0.50633	0.259754	0.207109
52.516	0.512234	0.281155	0.224002
53.068	0.514313	0.259997	0.224871
53.62	0.519279	0.275825	0.218893
54.172	0.498985	0.271251	0.229534
54.724	0.498155	0.296745	0.222904
55.276	0.493236	0.29315	0.234113
55.828	0.491294	0.301686	0.230019
56.38	0.48406	0.295116	0.229578
56.932	0.481314	0.30187	0.246264
57.484	0.486534	0.309781	0.235678
58.036	0.477111	0.310976	0.241271
58.588	0.476964	0.326238	0.24236
59.14	0.4755	0.314927	0.268657
59.692	0.471261	0.308883	0.265836
60.244	0.466527	0.337111	0.265735
60.796	0.466364	0.320491	0.261548
61.348	0.463414	0.318138	0.259265
61.9	0.462694	0.324014	0.268657
62.452	0.462605	0.308247	0.265836
63.004	0.462555	0.329543	0.265735
63.556	0.463146	0.329067	0.261548
64.108	0.458206	0.329398	0.277189
64.66	0.459465	0.328583	0.285251
65.212	0.458322	0.327537	0.280253
65.764	0.459814	0.327808	0.289275
66.316	0.459743	0.328022	0.286338
66.868	0.454466	0.326486	0.287409
67.42	0.453199	0.323219	0.291633
67.972	0.441511	0.318322	0.293446
68.524	0.43366	0.315596	0.289772
69.076	0.431522	0.31249	0.29094
69.628	0.43775	0.310824	0.293
70.18	0.435272	0.309715	0.298266
70.732	0.433977	0.30943	0.298506
71.284	0.433419	0.308628	0.305139
71.836	0.429789	0.306905	0.300333
72.388	0.429538	0.304171	0.301929
72.94	0.428643	0.302358	0.298855
73.492	0.418645	0.300171	0.30108
74.044	0.415431	0.297322	0.294919
74.596	0.412801	0.294179	0.296974
75.148	0.411242	0.292778	0.302323
75.7	0.409641	0.289954	0.299849
76.252	0.409076	0.287071	0.298276
76.804	0.408217	0.284231	0.297774
77.356	0.406881	0.278887	0.297823
77.908	0.406096	0.275593	0.305974
78.46	0.405316	0.273016	0.301409
79.012	0.403647	0.271122	0.296097
79.564	0.39931	0.269304	0.301084
80.116	0.397491	0.266328	0.295584
80.668	0.397256	0.261715	0.295119
81.22	0.395078	0.258718	0.299079
81.772	0.386897	0.256355	0.300658
82.324	0.38256	0.254095	0.29097
82.876	0.377599	0.250272	0.286599
83.428	0.377153	0.245644	0.283682
83.98	0.36577	0.24197	0.295832
84.532	0.365153	0.237413	0.287829
85.084	0.360289	0.236537	0.286519
85.636	0.359723	0.23249	0.286331
86.188	0.350087	0.230773	0.28563
86.74	0.347982	0.22798	0.2854
87.292	0.344885	0.224724	0.284939
87.844	0.338541	0.223322	0.28393
88.396	0.336717	0.22217	0.283346
88.948	0.336616	0.221331	0.281397
89.5	0.335762	0.218365	0.280716
90.052	0.334158	0.21612	0.278524
90.604	0.333325	0.213455	0.277694
91.156	0.333128	0.209507	0.277643
91.708	0.331313	0.207538	0.277518
92.26	0.329218	0.204839	0.277318
92.812	0.32901	0.200397	0.277169
93.364	0.326565	0.199387	0.275561
93.916	0.325858	0.197632	0.274206
94.468	0.325637	0.196229	0.273769
95.02	0.322823	0.192218	0.273739
95.572	0.322149	0.18934	0.27191
96.124	0.311308	0.186902	0.271471
96.676	0.310016	0.183659	0.270437
97.228	0.30973	0.181051	0.269309
97.78	0.308167	0.179843	0.268023
98.332	0.305558	0.177173	0.266475
98.884	0.305346	0.174978	0.266187
99.436	0.304063	0.170644	0.266173
99.988	0.303625	0.166744	0.2661
100.54	0.294783	0.162595	0.263962
101.092	0.291592	0.160569	0.262525
101.644	0.290693	0.158549	0.265266
102.196	0.289225	0.156577	0.265189
102.748	0.289159	0.155096	0.26355
103.3	0.281847	0.154536	0.263394
103.852	0.284481	0.152813	0.263219
104.404	0.286519	0.151952	0.26304
104.956	0.285905	0.14973	0.262514
105.508	0.284808	0.147618	0.261725
106.06	0.282665	0.146579	0.260037
106.612	0.281659	0.145214	0.259704
107.164	0.280311	0.143337	0.258759
107.716	0.277318	0.142111	0.258706
108.268	0.272027	0.140395	0.258595
108.82	0.26273	0.140486	0.258538
109.372	0.260431	0.137899	0.257418
109.924	0.257367	0.136446	0.257198
110.476	0.25082	0.136123	0.256385
111.028	0.274684	0.134769	0.25638
111.58	0.270042	0.133979	0.255958
112.132	0.269771	0.132949	0.255601
112.684	0.268657	0.131676	0.254798
113.236	0.267215	0.131456	0.254377
113.788	0.265836	0.131017	0.254256
114.34	0.265735	0.131781	0.253148
114.892	0.261548	0.131481	0.252728
115.444	0.259265	0.130809	0.252433
115.996	0.257812	0.129651	0.251748
116.548	0.257628	0.129382	0.250318
117.1	0.255501	0.129495	0.250064
117.652	0.251667	0.129799	0.249042
118.204	0.251595	0.130548	0.246614
118.756	0.250661	0.129874	0.253184
119.308	0.249086	0.129411	0.252004
119.86	0.24793	0.128247	0.250924
120.412	0.246037	0.127417	0.247725
120.964	0.241708	0.127586	0.247413
121.516	0.241705	0.127429	0.247403
122.068	0.236107	0.12686	0.247378
122.62	0.246264	0.126961	0.247297
123.172	0.24236	0.126586	0.247145
123.724	0.241271	0.125094	0.246904
124.276	0.235678	0.123914	0.246818
124.828	0.234113	0.123755	0.24672
125.38	0.230019	0.123055	0.246145
125.932	0.231957	0.122129	0.245213
126.484	0.229578	0.120639	0.244679
127.036	0.229534	0.120489	0.244529
127.588	0.22548	0.12031	0.244031
128.14	0.224871	0.120019	0.243886
128.692	0.22424	0.119433	0.243484
129.244	0.224002	0.119482	0.243206
129.796	0.222904	0.119441	0.242593
130.348	0.221023	0.118657	0.240881
130.9	0.220968	0.118498	0.240735
131.452	0.220106	0.11804	0.240706
132.004	0.218893	0.117839	0.240545
132.556	0.215589	0.118182	0.240311
133.108	0.21319	0.11823	0.239927
133.66	0.210179	0.118149	0.239094
134.212	0.205856	0.118544	0.239056
134.764	0.209702	0.118287	0.240055
135.316	0.209371	0.118538	0.238939
135.868	0.207526	0.118279	0.238906
136.42	0.207481	0.117254	0.238771
136.972	0.20714	0.117423	0.238749
137.524	0.207109	0.117396	0.238239
138.076	0.206524	0.11781	0.237858
138.628	0.205642	0.117371	0.237903
139.18	0.199747	0.117152	0.237528
139.732	0.198973	0.11712	0.237094
140.284	0.198199	0.116819	0.237067
140.836	0.197425	0.116853	0.236796
141.388	0.196651	0.11717	0.236631
141.94	0.195877	0.116769	0.235905
142.492	0.195103	0.117247	0.236034
143.044	0.194329	0.116913	0.235903
143.596	0.193555	0.117415	0.235809
144.148	0.192781	0.116502	0.235061
144.7	0.192007	0.116657	0.235679
145.252	0.191233	0.116906	0.234482
145.804	0.190459	0.116113	0.232884
146.356	0.189685	0.114916	0.231469
146.908	0.188911	0.114912	0.229562
147.46	0.188137	0.114264	0.233936
148.012	0.187363	0.113439	0.223172
148.564	0.186589	0.112527	0.222811
149.116	0.186815	0.112201	0.226352
149.668	0.185741	0.111391	0.236154
150.22	0.186268	0.111368	0.225635
150.772	0.185494	0.110761	0.230808
151.324	0.185586	0.110798	0.228515
151.876	0.185462	0.109834	0.225673
152.428	0.185338	0.110105	0.225038
152.98	0.185214	0.109994	0.208938
153.532	0.18509	0.110691	0.217691
154.084	0.184967	0.110018	0.217036
154.636	0.188076	0.110603	0.219864
155.188	0.187302	0.108884	0.213593
155.74	0.179528	0.108381	0.218059
156.292	0.178754	0.108342	0.212581
156.844	0.17798	0.108005	0.19697
157.396	0.173706	0.107899	0.209733
157.948	0.170832	0.107549	0.198472
158.5	0.167958	0.107211	0.19549
159.052	0.165084	0.106668	0.196597
159.604	0.16221	0.106951	0.190054
160.156	0.159336	0.106894	0.185099
160.708	0.156462	0.106432	0.186686
161.26	0.153588	0.106132	0.187304
161.812	0.150714	0.105758	0.193864
162.364	0.157241	0.104881	0.178922
162.916	0.160467	0.104318	0.183811
163.468	0.159693	0.105599	0.186743
164.02	0.154919	0.106033	0.187678
164.572	0.154145	0.104989	0.184502
165.124	0.153771	0.104377	0.184464
165.676	0.152597	0.103862	0.183971
166.228	0.151423	0.103796	0.18384
166.78	0.150249	0.103433	0.182761
167.332	0.149075	0.103356	0.181867
167.884	0.147901	0.102374	0.180908
168.436	0.146727	0.103133	0.180718
168.988	0.145553	0.103116	0.180181
169.54	0.147179	0.102182	0.178684
170.092	0.146405	0.101786	0.17798
170.644	0.146631	0.101025	0.177261
171.196	0.144857	0.101183	0.175603
171.748	0.145083	0.101872	0.173934
172.3	0.147309	0.101187	0.17398
172.852	0.145735	0.100595	0.175169
173.404	0.14559	0.0995681	0.175158
173.956	0.145445	0.100765	0.175102
174.508	0.145299	0.100126	0.175326
175.06	0.145154	0.0989457	0.17365
175.612	0.145008	0.100126	0.172657
176.164	0.144863	0.0989457	0.17103
176.716	0.144718	0.0990954	0.169699
177.268	0.144572	0.0984839	0.168004
177.82	0.144427	0.0983276	0.16591
178.372	0.14941	0.0981293	0.164602
178.924	0.158806	0.0981293	0.164129
179.476	0.164118	0.0955773	0.162789
180.028	0.15496	0.090608	0.1618
180.58	0.154946	0.0898147	0.160225
181.132	0.14545	0.0885593	0.15915
181.684	0.156803	0.0873871	0.15721
182.236	0.14571	0.0843237	0.156647
182.788	0.138741	0.0813349	0.15525
183.34	0.157715	0.0804084	0.154555
183.892	0.146943	0.0790168	0.153428
184.444	0.154713	0.0787908	0.151214
184.996	0.149008	0.0787813	0.149035
185.548	0.143759	0.0783573	0.148001
186.1	0.127154	0.0783184	0.146989
186.652	0.139425	0.0775103	0.146542
187.204	0.120691	0.0774652	0.145304
187.756	0.120036	0.0773624	0.144367
188.308	0.122864	0.0768488	0.143602
188.86	0.126976	0.0750715	0.143945
189.412	0.12739	0.0734053	0.144194
189.964	0.114904	0.0722174	0.144829
190.516	0.114511	0.0717951	0.144382
191.068	0.104588	0.0717434	0.144066
191.62	0.121101	0.0710236	0.143147
192.172	0.12441	0.0697337	0.142994
192.724	0.121977	0.06862	0.142418
193.276	0.123899	0.0679694	0.141447
193.828	0.123125	0.0671992	0.141021
194.38	0.122351	0.0654774	0.140723
194.932	0.121577	0.0597073	0.140934
195.484	0.120803	0.0561453	0.141127
196.036	0.120029	0.0549044	0.140325
196.588	0.119255	0.0545028	0.139366
197.14	0.118481	0.052351	0.138791
197.692	0.117707	0.0500339	0.138205
198.244	0.116933	0.0489343	0.137388
198.796	0.116159	0.0488849	0.136239
199.348	0.115386	0.0486268	0.135314
199.9	0.111351	0.0475688	0.134748
200.452	0.101299	0.0463986	0.134724
201.004	0.10423	0.0456945	0.13358
201.556	0.105166	0.0456754	0.133228
202.108	0.10455	0.0456068	0.132706
202.66	0.103776	0.0455539	0.131932
203.212	0.103002	0.0454831	0.131762
203.764	0.102228	0.0452777	0.131294
204.316	0.101454	0.0448332	0.13143
204.868	0.10068	0.0443667	0.131172
205.42	0.114085	0.0437941	0.130608
205.972	0.107541	0.043479	0.129973
206.524	0.102587	0.0433513	0.130038
207.076	0.104173	0.0429111	0.13007
207.628	0.104792	0.042822	0.130107
208.18	0.101989	0.0425101	0.12966
208.732	0.0938791	0.0424567	0.129475
209.284	0.0992589	0.0420916	0.129137
209.836	0.0999064	0.0418942	0.129181
210.388	0.0991324	0.0418383	0.12944
210.94	0.0983585	0.0415432	0.129495
211.492	0.0975845	0.0413212	0.12968
212.044	0.0992589	0.0412387	0.129399
212.596	0.0912432	0.0412239	0.128689
213.148	0.0950146	0.0409179	0.12803
213.7	0.0968263	0.0406859	0.127706
214.252	0.0951268	0.0403834	0.12755
214.804	0.0879183	0.0403318	0.12709
215.356	0.0896189	0.0400008	0.126843
215.908	0.0885867	0.0389406	0.126661
216.46	0.0963955	0.0388879	0.126485
217.012	0.0806409	0.0387639	0.126322
217.564	0.0914307	0.03799	0.126453
218.116	0.092227	0.037216	0.125608
218.668	0.0915636	0.0364421	0.124575
219.22	0.08262	0.0356681	0.124085
219.772	0.0879374	0.0348942	0.123688
220.324	0.077933	0.0341202	0.123758
220.876	0.0894546	0.0333463	0.123394
221.428	0.0844273	0.0325723	0.123116
221.98	0.0836534	0.0317984	0.122422
222.532	0.083281	0.0310244	0.122045
223.084	0.0852543	0.0302504	0.121947
223.636	0.0856789	0.0294765	0.121876
224.188	0.0819751	0.0287025	0.122021
224.74	0.0817858	0.0279286	0.121953
225.292	0.0859706	0.0299972	0.122041
225.844	0.0844768	0.0297856	0.12213
226.396	0.0828794	0.0295673	0.122007
226.948	0.0821054	0.0293374	0.12202
227.5	0.0813315	0.029171	0.121937
228.052	0.0805575	0.0279196	0.121547
228.604	0.0797836	0.0278819	0.121007
229.156	0.0790096	0.0278356	0.121022
229.708	0.0782357	0.0261749	0.121165
230.26	0.0774617	0.0255965	0.120805
230.812	0.0766877	0.0254092	0.120106
231.364	0.0759138	0.024406	0.119835
231.916	0.0751398	0.0233258	0.120093
232.468	0.0743659	0.0228132	0.119951
233.02	0.0813361	0.0227902	0.119895
233.572	0.0735561	0.0226698	0.120179
234.124	0.0703783	0.0221766	0.119995
234.676	0.0708439	0.021631	0.120067
235.228	0.0768153	0.0213028	0.12034
235.78	0.0736233	0.0212939	0.120556
236.332	0.0717081	0.0212619	0.120587
236.884	0.0712701	0.0212372	0.120853
237.436	0.0703783	0.0212042	0.120503
237.988	0.0708439	0.0211085	0.120578
238.54	0.0768153	0.0209012	0.12015
239.092	0.0736233	0.0206838	0.120402
239.644	0.0757081	0.0204168	0.12018
240.196	0.0700031	0.0202699	0.120123
240.748	0.0788701	0.0202104	0.119932
241.3	0.0716257	0.0200052	0.119757
241.852	0.0614437	0.0199636	0.118449
242.404	0.0794727	0.0198182	0.118366
242.956	0.077248	0.0197934	0.118018
243.508	0.0797568	0.0196231	0.117932
244.06	0.0885274	0.0195311	0.117545
244.612	0.0783719	0.0228346	0.117735
245.164	0.0738335	0.016381	0.117555
245.716	0.0733876	0.0163742	0.117907
246.268	0.0698485	0.0163306	0.117671
246.82	0.060157	0.0162316	0.117315
247.372	0.0683753	0.015905	0.117397
247.924	0.0689482	0.0157566	0.117826
248.476	0.0681742	0.0156997	0.118172
249.028	0.0674003	0.0155868	0.118732
249.58	0.0666263	0.0153832	0.118984
250.132	0.0658524	0.0153513	0.119764
250.684	0.0650784	0.0150894	0.120256
251.236	0.0643045	0.0150186	0.120256
251.788	0.0635305	0.0152628	0.120291
252.34	0.0627566	0.0139178	0.12018
252.892	0.0619826	0.0130875	0.119755
253.444	0.0612087	0.0127982	0.118954
253.996	0.0604347	0.0127046	0.118792
254.548	0.0547357	0.012203	0.118729
255.1	0.0704698	0.0116629	0.118379
255.652	0.0593542	0.0114066	0.118012
256.204	0.0649625	0.0113951	0.117839
256.756	0.0534211	0.0113349	0.11804
257.308	0.0522315	0.0110883	0.118352
257.86	0.0599436	0.0108155	0.117993
258.412	0.0664631	0.0106514	0.118282
258.964	0.0545643	0.010647	0.114328
259.516	0.0683737	0.010631	0.114082
260.068	0.0644355	0.0106186	0.113838
260.62	0.0551055	0.0106021	0.113189
261.172	0.0498194	0.0105542	0.113175
261.724	0.0572848	0.0104506	0.112755
262.276	0.0526922	0.0103419	0.112635
262.828	0.042237	0.0102084	0.112367
263.38	0.0489613	0.010135	0.111211
263.932	0.0472774	0.0101052	0.10939
264.484	0.0465035	0.0109016	0.108294
265.036	0.0457295	0.0101276	0.107643
265.588	0.0456631	0.00935365	0.106736
266.14	0.0481761	0.00857969	0.106565
266.692	0.0431776	0.00780574	0.106188
267.244	0.03844	0.00703178	0.105548
267.796	0.0263768	0.00786716	0.104357
268.348	0.0357694	0.0070932	0.103363
268.9	0.0414265	0.00631925	0.10189
269.452	0.0426337	0.00638507	0.10148
270.004	0.0418598	0.00639184	0.101279
270.556	0.0410858	0.00634151	0.10105
271.108	0.0403119	0.0062774	0.100996
271.66	0.0395379	0.00616322	0.100427
272.212	0.0399835	0.00608281	0.100359
272.764	0.0380298	0.00596811	0.0999089
273.316	0.0266933	0.00584659	0.0992873
273.868	0.0315415	0.0057249	0.0979963
274.42	0.036522	0.00563539	0.0976434
274.972	0.0299389	0.00557298	0.0970783
275.524	0.0334986	0.00553765	0.0962801
276.076	0.0372129	0.00555925	0.0961295
276.628	0.0284145	0.00558623	0.0958286
277.18	0.0248328	0.00561569	0.0948145
277.732	0.0240588	0.00559971	0.0929912
278.284	0.0232848	0.00559971	0.0907907
278.836	0.0225109	0.00560731	0.0889405
279.388	0.0217369	0.00561597	0.0898623
279.94	0.0205541	0.00555806	0.0884586
280.492	0.0218969	0.005453	0.0883192
281.044	0.0181059	0.00528654	0.0868953
281.596	0.0288013	0.00510281	0.0852045
282.148	0.0224038	0.00489966	0.0833329
282.7	0.02589	0.00467319	0.0828751
283.252	0.0167783	0.00446371	0.082205
283.804	0.0182429	0.00432968	0.082082
284.356	0.0255568	0.00419086	0.0817164
284.908	0.0268978	0.00410741	0.0813531
285.46	0.0201616	0.00402739	0.0811833
286.012	0.020963	0.00396044	0.0809783
286.564	0.020189	0.00387197	0.0805538
287.116	0.0194151	0.00376342	0.0803707
287.668	0.0186411	0.00363416	0.0798403
288.22	0.0133813	0.00351322	0.0793812
288.772	0.0144632	0.00340371	0.0791038
289.324	0.0154307	0.00328201	0.0785128
289.876	0.0051249	0.00317223	0.0785127
290.428	0.00701114	0.00309555	0.0782604
290.98	0.0050364	0.00303677	0.0776916
291.532	0.00199903	0.00297418	0.0773651
292.084	0.0193214	0.00293424	0.0770921
292.636	0.0211161	0.00289004	0.0764154
293.188	0.0236744	0.00283974	0.0762479
293.74	0.0144966	0.00280202	0.0758375
294.292	0.0155453	0.00279045	0.0754092
294.844	0.0147713	0.00276312	0.0753995
295.396	0.0139974	0.00274478	0.0736986
295.948	0.0132234	0.00273815	0.0717745
296.5	0.0124495	0.00272716	0.0692059
297.052	0.0116755	0.00269222	0.0659892
297.604	0.0144966	0.0026628	0.0628687
298.156	0.0115823	0.00264442	0.0598355
298.708	0.0251026	0.00263223	0.057461
299.26	0.00325095	0.00261747	0.0554343
299.812	0.0227326	0.0026068	0.054524
900.628	0.0225485	-0.0116347	0.0188638
901.18	0.0237665	-0.0099621	0.0294836
901.732	0.0226094	-0.0145897	-0.0088461
902.284	-0.0073674	-0.0118175	0.00347165
902.836	-0.0191475	-0.0057703	0.00705045
903.388	0.00078672	-0.0143138	0.0166305
903.94	-0.0053627	-0.0105726	0.00764398
904.492	0.0328403	-0.0161435	0.0157063
905.044	0.00149006	-0.011165	-0.0010917
905.596	-0.0220348	-0.0093667	-0.0257689
906.148	0.0156027	-0.0073815	-0.0200661
906.7	-0.0037892	-0.0007726	0.0173194
907.252	-0.0276862	-0.0129046	0.034644
907.804	0.00674941	-0.0085614	0.0288961
908.356	-0.0153969	0.00522631	0.0242176
908.908	0.0246217	-0.005353	0.0226272
909.46	0.0103121	-0.0074986	0.01916
910.012	0.0203881	-0.0113316	0.0178195
910.564	-0.0182526	0.00269355	0.0162896
911.116	0.00620492	0.00404611	0.0151913
911.668	-0.0071552	-0.0021568	0.0110051
912.22	0.00791499	0.00532186	0.00927062
912.772	-0.0296501	-0.0039708	0.0091725
913.324	0.0146756	0.00734105	0.00904336
913.876	0.00833033	0.00204736	0.00812813
914.428	0.0151374	0.00263146	-0.0012129
914.98	-0.0126347	0.00092986	-0.0014275
915.532	-0.0284165	0.00112063	-0.001722
916.084	-0.0211349	0.00506288	-0.0026168
916.636	0.00275912	0.011788	-0.0039574
917.188	0.0293445	0.0196534	-0.0085999
917.74	-0.000613	0.00970378	-0.0087845
918.292	-0.0187154	0.00771662	-0.0130262
918.844	-0.014523	0.0177885	-0.0156026
919.396	-0.0434867	0.0245505	-0.0163411
919.948	0.00756403	0.0228527	-0.0209537
920.5	0.00898984	0.020126	-0.0210195
921.052	0.00517526	0.0152259	-0.0224364
921.604	0.00644087	0.0124274	-0.0232262
922.156	-0.0202863	0.0194333	-0.0251935
922.708	0.0104389	-0.0071278	-0.0264169
923.26	-0.0906986	-0.005775	-0.032037
923.812	-0.026493	-0.0040372	-0.0411634
924.364	0.0244739	-0.0019493	-0.0564895
924.916	-0.0188146	-0.0014867	-0.0006934
925.468	0.00974613	-0.0011899	-0.0006131
926.02	0.00353087	-0.0012305	-0.0006364
926.572	-0.0060757	-0.0010595	-0.000582
927.124	-0.035126	-0.0010929	-0.00041
927.676	-0.0086705	-0.0009757	-0.0007835
928.228	0.0153749	-0.0009791	-0.000489
928.78	0.0476008	-0.0010601	-0.0001344
929.332	-0.0019986	-0.0096708	-0.0641129
929.884	-0.0097942	-0.0086042	-0.051266
930.436	0.00904656	-0.0085431	-0.0735392
930.988	0.00187111	-0.0087264	-0.0637765
931.54	-0.013624	-0.0090976	-0.0313986
932.092	0.00030335	-0.0074667	-0.0422395
932.644	0.00946095	-0.008778	-0.0441373
933.196	-0.0079619	-0.0079066	-0.0552139
933.748	-0.0020706	-0.0075092	-0.0371245
934.3	-0.0252942	-0.0070837	-0.0546899
934.852	-0.0147342	-0.006751	-0.0697963
935.404	-0.0207778	-0.006587	-0.0699859
935.956	0.00309567	-0.0066037	-0.011116
936.508	0.0230904	-0.0056212	-0.0210524
937.06	-0.0165686	-0.0066099	-0.04079
937.612	0.00359809	-0.0062773	-0.0195245
938.164	-0.0086624	-0.0057597	-0.0492929
938.716	0.0180281	-0.0056589	-0.0181238
939.268	0.00838516	-0.0048843	-0.0155564
939.82	-0.0112175	-0.0066169	-0.0289588
940.372	-0.0107189	-0.0058323	-0.0423795
940.924	-0.0118043	-0.0068859	-0.0644079
941.476	-0.0067353	-0.005638	-0.0579094
942.028	-0.0185191	-0.0053965	-0.0501741
942.58	-0.0288211	-0.006039	-0.05158
943.132	-0.0161962	-0.0043565	-0.0504439
943.684	-0.0479311	-0.0042566	-0.0251023
944.236	0.00885684	-0.0056437	-0.0212225
944.788	-0.0202594	-0.0045255	-0.0438048
945.34	-0.0026868	-0.0041745	-0.0460104
945.892	-0.0113784	-0.0041699	-0.0217549
946.444	-0.0195675	-0.0040778	-0.0523572
946.996	-0.0118105	-0.0038639	-0.0362764
947.548	0.00508657	-0.0047819	-0.0343535
948.1	0.003606	-0.0046599	-0.0617177
948.652	-0.0022586	-0.0032081	-0.0606957
949.204	-0.0218393	-0.003078	-0.0280462
949.756	-0.0282902	-0.0033906	-0.0403229
950.308	0.0163123	-0.0026275	-0.053156
950.86	-0.0149188	-0.0029406	-0.0442492
951.412	-0.0035886	-0.0020095	-0.0272823
951.964	-0.0351473	-0.0026135	-0.0457399
952.516	-0.0216044	-0.0026933	-0.0362764
953.068	-0.0177615	-0.0022724	-0.0689029
953.62	-0.0499249	-0.0028183	-0.0363385
954.172	-0.0111789	-0.0023318	-0.0696999
954.724	-0.0124163	-0.0022337	-0.0484566
955.276	-0.0415496	-0.0023174	0.0040773
955.828	0.00390247	-0.0015957	-0.016776
956.38	0.00187707	-0.0026438	-0.0641308
956.932	-0.0256481	-0.0016611	-0.0680231
957.484	0.0203059	-0.0018471	-0.0547396
958.036	-0.0262203	-0.0019015	-0.0462349
958.588	-0.0110404	-0.0020473	-0.0445791
959.14	-0.0227237	-0.0014262	-0.0503917
959.692	-0.0017008	-0.0012998	-0.0336786
960.244	-0.0170462	-0.0015214	-0.0535996
960.796	-0.025512	-0.0017918	-0.0685604
961.348	0.00274525	-0.0040218	-0.0081559
961.9	0.00941796	-0.0126541	-0.0562341
962.452	0.00177588	-0.0055949	-0.0448346
963.004	-0.0347399	-0.0031262	-0.0255835
963.556	-0.0309967	-0.0059725	-0.0471427
964.108	-0.0345779	0.00431133	-0.0333639
964.66	0.00055603	-0.0017258	-0.0508359
965.212	-0.0068604	0.00016027	-0.0433894
965.764	0.00327375	0.00656272	-0.0216451
966.316	-0.0271607	0.00269055	-0.0564043
966.868	-0.0370349	0.0006482	-0.0341959
967.42	-0.0044718	0.0128383	-0.0510538
967.972	0.00243225	0.0043553	-0.0283827
968.524	-0.0144574	0.00634741	-0.0425567
969.076	0.00374437	0.015577	-0.0853572
969.628	0.0180492	0.0207133	-0.0241165
970.18	0.00295712	0.00893224	-0.0510422
970.732	-0.002859	0.0114609	-0.0370311
971.284	-0.0452308	0.0118255	-0.0470965
971.836	-0.0140293	0.00488825	-0.0084099
972.388	-0.0238101	0.0136649	-0.0585162
972.94	-0.0533451	0.00631524	-0.0523427
973.492	0.00374042	0.0154811	-0.0115519
974.044	0.0133281	0.012809	-0.037433
974.596	0.00318274	0.0116641	-0.045599
975.148	-0.0110384	0.0100478	-0.0546518
975.7	0.0182546	0.0153803	-0.065661
976.252	-0.0198553	0.0126323	-0.0660883
976.804	-0.0050126	0.0155847	-0.0453086
977.356	-0.0073937	0.013163	-0.0358162
977.908	-0.0112909	0.0209754	-0.0416141
978.46	0.00450276	0.023971	-0.0417625
979.012	-0.0297726	0.012182	-0.0586164
979.564	0.00895268	0.0228792	-0.055501
980.116	0.0202658	0.0181393	-0.0363837
980.668	-0.0107921	0.0202649	-0.0189616
981.22	0.0176766	0.0172785	-0.036754
981.772	-0.0103488	0.0236691	-0.0703083
982.324	-0.0008662	0.0196304	-0.110709
982.876	0.00653522	0.028384	-0.0602077
983.428	-0.0232968	0.0363364	-0.0474802
983.98	-0.0286651	0.0276926	-0.0790329
984.532	0.0172306	0.0291155	-0.0261371
985.084	-0.0320667	0.0206813	-0.0751938
985.636	-0.0312296	0.0272561	-0.0422052
986.188	0.00486772	0.0232663	-0.049829
986.74	0.02846	0.0268595	-0.0189534
987.292	-0.0004196	0.0307346	-0.04731
987.844	-0.055027	0.0321795	-0.0527798
988.396	0.0118681	0.0313037	-0.0500755
988.948	-0.0228383	0.0312418	-0.0519699
989.5	-0.0023286	0.0342085	-0.0248647
990.052	0.00264424	0.0296487	-0.0380165
990.604	0.0258516	0.0327775	-0.0131045
991.156	0.0016707	0.0425838	-0.0037533
991.708	-0.0054513	0.0355014	-0.0108203
992.26	-0.0132068	0.0422473	-0.029126
992.812	-0.0112298	0.035936	-0.038059
993.364	-0.031488	0.0420862	-0.0233804
993.916	-0.0245202	0.0383684	-0.085162
994.468	-0.0308147	0.0472694	-0.0488327
995.02	0.0275343	0.0422818	-0.0338388
995.572	0.00448895	0.0446217	-0.047385
996.124	-0.0127736	0.042633	-0.0273489
996.676	0.0151876	0.0488288	0.00365708
997.228	-0.0052037	0.0521685	-0.0466353
997.78	0.0141126	0.0448086	-0.0055241
998.332	-0.0061181	0.0490151	-0.058985
998.884	-0.0143222	0.0401781	-0.0394127
999.436	-0.015048	0.0406386	-0.0290814
999.988	0.00039887	0.0380958	-0.0343198
1000.54	0.0108833	0.0367736	-0.0358162
1001.09	0.01314	0.0407433	-0.0217165
1001.64	0.016555	0.036262	-0.0450213
1002.2	0.0044554	0.0369096	-0.0500813
1002.75	-0.0045562	0.0441991	-0.0619223
1003.3	-0.0034943	0.0375828	-0.0336252
1003.85	-0.0098673	0.0395194	-0.0462522
1004.4	0.0201396	0.0347916	-0.0103556
1004.96	0.0291587	0.0453446	-0.0505397
1005.51	0.0193034	0.0492084	-0.0064664
1006.06	-0.0202677	0.0440498	-0.0446911
1006.61	0.00217258	0.0481397	-0.0333526
1007.16	-0.0116352	0.0508606	-0.0100093
1007.72	-0.0026167	0.0498698	-0.0696036
1008.27	-0.0059871	0.0486314	-0.0562811
1008.82	-0.0212221	0.0467097	-0.0168304
1009.37	0.0217888	0.0494568	0.0284171
1009.92	0.0171344	0.0564179	-0.0132611
1010.48	0.0189662	0.0474791	-0.019787
1011.03	0.00761699	0.057221	-0.0121632
1011.58	0.0134308	0.0446876	-0.0535909
1012.13	0.0148534	0.0569301	-0.0283743
1012.68	-0.0342221	0.0461815	-0.0205481
1013.24	0.0103238	0.0408309	-0.0555889
1013.79	0.00760522	0.0468118	-0.0804373
1014.34	-0.0120776	0.041902	-0.0190189
1014.89	0.00031529	0.0425137	-0.0371924
1015.44	-0.0199154	0.0405794	-0.0348406
1016	-0.0182568	0.0481821	-0.059983
1016.55	0.00283437	0.0526839	-0.0476881
1017.1	0.00843215	0.048184	-0.0285635
1017.65	-0.0339644	0.0557574	-0.0320426
1018.2	-0.0207903	0.0519997	-0.0179248
1018.76	-0.0025247	0.0442275	-0.0182684
1019.31	-0.0157769	0.056948	-0.0696729
1019.86	-0.0070825	0.0566725	-0.0409154
1020.41	-0.0248652	0.0628422	-0.0407131
1020.96	-0.0206513	0.0552851	-0.0422509
1021.52	-0.015128	0.0635287	-0.064706
1022.07	0.00898984	0.0542283	-0.0467592
1022.62	0.00471191	0.0604018	-0.0255226
1023.17	-0.0158447	0.0624672	-0.0096365
1023.72	0.0420924	0.0595839	-0.0078164
1024.28	0.0164144	0.0512656	-0.0197487
1024.83	0.0264502	0.0603446	-0.0190353
1025.38	0.00527773	0.0520331	-0.0243924
1025.93	0.0198757	0.0424991	-0.0107262
1026.48	0.0240625	0.0609627	-0.0335156
1027.04	0.00805217	0.0520842	-0.0272379
1027.59	0.0444547	0.0521761	-0.0085918
1028.14	0.0288996	0.0576877	-0.0174835
1028.69	-0.0180751	0.061726	-0.0196722
1029.24	-0.0236848	0.0605153	-0.0125999
1029.8	0.00640352	0.0650597	-0.0571681
1030.35	-0.0074321	0.0571567	-0.0417568
1030.9	-0.0175924	0.0563553	-0.0434295
1031.45	-0.0088387	0.0522525	-0.0349054
1032	-0.0057493	0.0555473	-0.100886
1032.56	0.0146736	0.0551545	-0.0886454
1033.11	0.00825982	0.0593345	-0.057077
1033.66	-0.0181969	0.0627707	0.0145148
1034.21	-0.0149926	0.0634275	-0.0576446
1034.76	-0.0340836	0.0614608	-0.0775282
1035.32	0.0219945	0.0714259	-0.0316057
1035.87	0.0002516	0.0734581	-0.0569859
1036.42	0.00439026	0.0588931	-0.0327744
1036.97	-0.0145784	0.0644064	-0.0624565
1037.52	-0.0291985	0.0687378	-0.0398136
1038.08	-0.0242611	0.0701095	-0.0514695
1038.63	0.0193379	0.0592908	-0.0346547
1039.18	0.00252736	0.0653888	-0.0446222
1039.73	0.0123967	0.0664226	-0.0585545
1040.28	0.0323166	0.0727644	-0.0602491
1040.84	0.028894	0.0716278	-0.0482976
1041.39	0.0106299	0.0703518	0.00405382
1041.94	-0.0137345	0.0666816	-0.0531647
1042.49	0.0107761	0.0709983	-0.0303197
1043.04	-0.0221804	0.0729996	-0.0312252
1043.6	-0.0023046	0.0699841	-0.0146539
1044.15	-0.0023546	0.0710711	-0.0624654
1044.7	-0.0047934	0.0609346	-0.0463991
1045.25	-0.0176666	0.069311	-0.0271934
1045.8	0.0124821	0.0702733	-0.0059764
1046.36	-0.0003857	0.0704752	-0.0385354
1046.91	0.00485194	0.0739902	-0.0236422
1047.46	-0.0013572	0.0738518	0.0183901
1048.01	0.0172594	0.073618	-0.0249144
1048.56	-0.0057271	0.0734373	-0.0447513
1049.12	0.00141063	0.0732981	0.0166534
1049.67	-0.0005831	0.0732876	-0.044737
1050.22	-0.0105582	0.0732112	0.0131283
1050.77	-0.0152717	0.0730598	-0.024478
1051.32	-0.0038915	0.0729148	-0.0424853
1051.88	-0.0183559	0.0723577	0.00184687
1052.43	0.0169593	0.0721718	-0.0465229
1052.98	-0.0112583	0.0721602	-0.0322528
1053.53	0.0144338	0.0717238	-0.0155646
1054.08	-0.0227508	0.0712226	-0.0066556
1054.64	0.0241308	0.0709115	-0.0222275
1055.19	-0.0027349	0.0705276	-0.0366833
1055.74	0.0130508	0.0704601	-0.0253733
1056.29	0.00685941	0.0704252	-0.0246989
1056.84	-0.0035986	0.0703661	0.00022467
1057.4	0.0158168	0.0700175	-0.0433206
1057.95	-0.0390067	0.0698476	-0.0171595
1058.5	-0.0042027	0.0696791	-0.029151
1059.05	-0.0043031	0.0694986	-0.0122386
1059.6	-0.0212491	0.0693812	0.00298033
1060.16	-0.0368336	0.0691185	-0.00266
1060.71	0.0158882	0.0689047	-0.0328417
1061.26	-0.0026888	0.0683682	0.0260725
1061.81	-0.0247398	0.0696992	-0.030222
1062.36	0.0037167	0.068528	-0.0394213
1062.92	-0.0210871	0.0682322	-0.0194808
1063.47	-0.0130556	0.066048	-0.0123734
1064.02	-0.0382978	0.0674833	-0.0291845
1064.57	0.0171979	0.0672392	-0.0263532
1065.12	0.00566772	0.0667653	-0.0206604
1065.68	0.00659811	0.066048	-0.0340806
1066.23	-0.0180834	0.0657876	-0.0332066
1066.78	-0.0252251	0.064429	-0.0300182
1067.33	-0.0007186	0.0625047	0.0103229
1067.88	0.0195772	0.0621602	0.00085002
1068.44	0.0336797	0.0621577	0.0176292
1068.99	0.0101892	0.0621481	0.0296842
1069.54	0.00940819	0.0620635	0.0277835
1070.09	0.00039091	0.0619218	0.00353956
1070.64	-0.0028831	0.0619217	-0.045415
1071.2	0.0039894	0.0619182	-0.0168222
1071.75	0.0265031	0.061899	-0.0184593
1072.3	0.00384516	0.0617714	-0.0506239
1072.85	-0.0322407	0.0617366	-0.0419995
1073.4	-0.0330604	0.0617238	0.0042286
1073.96	-0.0093598	0.061592	-0.042734
1074.51	0.0122529	0.0615657	0.00144837
1075.06	0.0135994	0.0615018	-0.0358303
1075.61	0.0123287	0.0614039	0.0213062
1076.16	-0.013579	0.0612227	-0.0252295
1076.72	0.00903287	0.0611814	0.0245656
1077.27	0.0208542	0.0611507	-0.0266442
1077.82	-0.0076019	0.0611132	-0.0231794
1078.37	0.0103726	0.0610661	-0.0422766
1078.92	-0.0092624	0.0609115	-0.0542365
1079.48	-0.0041244	0.0608988	-0.0187814
1080.03	0.0291418	0.0608464	-0.0239841
1080.58	0.0102399	0.0608182	0.0219835
1081.13	0.0113934	0.0608121	0.0149821
1081.68	0.0382656	0.0607158	-0.0378918
1082.24	0.00557911	0.0563184	-0.0632767
1082.79	0.00796203	0.0562817	-0.0131693
1083.34	0.0233146	0.0562276	-0.051202
1083.89	0.0162082	0.056174	-0.0218812
1084.44	0.0143042	0.0560792	-0.036525
1085	0.014778	0.0560592	-0.0499681
1085.55	0.00857702	0.0559445	-0.0327884
1086.1	0.00643891	0.0558786	-0.0224309
1086.65	0.0251746	0.0557612	-0.0094729
1087.2	-0.0011815	0.0555662	-0.04595
1087.76	0.0208427	0.0554985	0.00449717
1088.31	0.0102672	0.055347	-0.0080356
1088.86	0.0218498	0.0553109	0.00205124
1089.41	-0.0157461	0.0552847	-0.0169201
1089.96	0.0267766	0.054908	0.0164779
1090.52	0.0236261	0.0548743	0.0233679
1091.07	0.0371352	0.054772	-0.0142532
1091.62	0.0374526	0.0547482	-0.0327715
1092.17	0.0357485	0.0546896	-0.008557
1092.72	0.0226379	0.0546122	-0.0088059
1093.28	-0.0049704	0.0545889	-0.020433
1093.83	0.00936715	0.0544748	-0.0243648
1094.38	0.0188876	0.0535031	-0.0117861
1094.93	0.0117184	0.0526895	-0.0429171
1095.48	0.0323054	0.0525757	0.0145071
1096.04	0.039386	0.0514674	0.0172584
1096.59	0.00346364	0.0510531	0.0180453
1097.14	0.0277489	0.0509353	0.0049297
1097.69	0.026654	0.0505377	-0.0274738
1098.24	0.0438616	0.050247	-0.0232207
1098.8	0.0397368	0.0502099	0.0157267
1099.35	0.0114616	0.0490754	-0.0251051
1099.9	0.0271047	0.0485843	-0.0082067
1100.45	0.00396174	0.0483333	-0.0183556
1101	0.0087688	0.0479012	-0.0213459
1101.56	0.00890183	0.0477496	0.00141952
1102.11	0.0528568	0.0470867	-0.0663276
1102.66	0.0289728	0.0470213	-0.0007148
1103.21	0.0401938	0.0467132	-0.0354438
1103.76	-0.0006209	0.0465583	-0.0513125
1104.32	0.0192229	0.04649	-0.0420909
1104.87	0.0141978	0.0463064	-0.0547513
1105.42	0.0311796	0.046281	-0.0122036
1105.97	0.019782	0.0457881	0.0104877
1106.52	0.00765033	0.045574	-0.0807414
1107.08	0.0358967	0.0445059	-0.0137556
1107.63	0.0461934	0.0444598	-0.0176987
1108.18	0.0456188	0.0444186	0.0240248
1108.73	0.0362593	0.0443999	0.0191448
1109.28	0.0412732	0.0443908	-0.0312196
1109.84	0.00219637	0.0443727	-0.0138205
1110.39	0.0273478	0.0443457	-0.0455674
1110.94	0.0150698	0.0443305	-0.0135178
1111.49	0.0224762	0.044245	-0.0471802
1112.04	0.0104428	0.0442434	0.0251509
1112.6	-0.0041143	0.0442338	-0.0701998
1113.15	0.0411084	0.0442137	-0.0364459
1113.7	0.0256701	0.0441905	-0.0161726
1114.25	0.0359947	0.0441718	-0.0389583
1114.8	0.0433079	0.0418836	-0.0117564
1115.36	0.0599754	0.0418716	-0.0151226
1115.91	0.0413756	0.0418699	-0.0179276
1116.46	0.0435684	0.0418224	0.00302739
1117.01	0.0356615	0.0418036	-0.0075413
1117.56	0.012113	0.0417572	-0.0314686
1118.12	0.0438125	0.0417394	-0.0236312
1118.67	0.019154	0.0417385	-0.0325247
1119.22	0.0405056	0.0417316	-0.0139178
1119.77	0.0162718	0.0416804	-0.0206193
1120.32	0.00049238	0.041675	-0.0125136
1120.88	0.0437997	0.0416916	-0.0410921
1121.43	0.0390128	0.0404405	-0.0143019
1121.98	0.025638	0.03897	-0.0155564
1122.53	0.0365514	0.0379273	-0.0443668
1123.08	0.0303022	0.0370859	-0.0551641
1123.64	0.0231075	0.0363968	-0.023543
1124.19	-0.003723	0.0360361	-0.031379
1124.74	0.048968	0.0348363	-0.0196667
1125.29	0.0396101	0.0342001	-0.0157355
1125.84	0.0328999	0.0339508	-0.0146566
1126.4	0.00947267	0.0338941	-0.050987
1126.95	0.0379063	0.0338192	-0.0403514
1127.5	0.0204607	0.0335815	-0.0348913
1128.05	0.0203155	0.0331262	-0.0259045
1128.6	0.00686137	0.0322189	0.00507553
1129.16	-0.002827	0.0313231	0.00996206
1129.71	0.0274703	0.0304426	-0.0080142
1130.26	0.00881575	0.0299487	-0.0358782
1130.81	0.0290629	0.0298741	-0.0505107
1131.36	0.0399535	0.029282	-0.0384021
1131.92	0.0118487	0.0283723	-0.0325331
1132.47	0.0294795	0.0269163	-0.0211402
1133.02	0.0144261	0.026164	-0.0012182
1133.57	0.0141939	0.0258103	-0.0107934
1134.12	0.0472087	0.0252137	-0.0248619
1134.68	0.0334732	0.0250139	-0.0367596
1135.23	0.0339065	0.025006	-0.0680621
1135.78	0.0326484	0.0249707	-0.0135367
1136.33	0.0139713	0.0245505	-0.0138989
1136.88	0.00778366	0.024973	-0.0155619
1137.44	0.0189183	0.0247725	-0.0626317
1137.99	0.023174	0.0245699	-0.0129669
1138.54	0.0355004	0.0246048	-0.0488153
1139.09	0.0482488	0.0245955	-0.0293572
1139.64	0.0464144	0.0242409	-0.0586695
1140.2	0.010236	0.0237813	-0.0512689
1140.75	0.0220383	0.0230981	-0.0252627
1141.3	0.0265446	0.0221062	-0.0240889
1141.85	0.00918733	0.0216029	-0.0237773
1142.4	0.0529854	0.0218322	-0.0147324
1142.96	0.0288733	0.0220195	-0.0125622
1143.51	0.0403919	0.021511	-0.0160694
1144.06	0.0172094	0.020615	-0.038998
1144.61	0.0402159	0.0199605	0.0129643
1145.16	0.0233013	0.0192377	-0.0312196
1145.72	0.0624114	0.0188655	0.0128156
1146.27	0.0411908	0.0182421	-0.0185357
1146.82	0.0168689	0.0181787	-0.0181048
1147.37	0.0452214	0.017872	-0.0077897
1147.92	0.0124355	0.0179115	-0.0494059
1148.48	0.0395936	0.0178895	0.00228957
1149.03	0.0389503	0.018066	-0.0474687
1149.58	0.0384461	0.0183649	0.0345558
1150.13	0.00682405	0.0180034	0.00167912
1150.68	0.00634061	0.0175496	-0.0788583
1151.24	0.0257835	0.0172722	-0.0253705
1151.79	0.0144319	0.0170903	-0.0197214
1152.34	0.0222497	0.0168974	-0.0154371
1152.89	0.00778954	0.0170456	-0.0207097
1153.44	0.0208828	0.0173542	-0.0230637
1154	0.0354096	0.0174763	-0.016121
1154.55	0.0102204	0.0175539	-0.0270381
1155.1	0.0265993	0.0173611	-0.0307834
1155.65	0.0292938	0.0175829	-0.0137691
1156.2	0.00728152	0.0175833	-0.0556768
1156.76	0.0135471	0.0174971	-0.0179712
1157.31	0.0300044	0.0180779	-0.0397795
1157.86	0.0127481	0.0188552	0.0282557
1158.41	0.0359263	0.0197353	-0.0532873
1158.96	0.017763	0.0199028	-0.0094274
1159.52	0.0368896	0.0197927	-0.0006042
1160.07	0.0245326	0.0196031	-0.035393
1160.62	0.0481117	0.019428	-0.0004805
1161.17	0.0126957	0.0190478	-0.0032553
1161.72	0.0135878	0.0181787	-0.0047853
1162.28	-0.0005591	0.0176024	-0.0558528
1162.83	0.0200937	0.0171002	-0.0490266
1163.38	0.0370004	0.0169733	-0.0157735
1163.93	0.050439	0.0166845	-0.0154452
1164.48	0.0467891	0.0164078	-0.0397027
1165.04	0.0127928	0.0162219	-0.0534828
1165.59	-0.000587	0.0162183	0.0130002
1166.14	0.0112864	0.016308	-0.0243427
1166.69	0.0199121	0.0161394	-0.0212746
1167.24	-0.0024486	0.015835	-0.018664
1167.8	0.0130721	0.0157416	0.00874106
1168.35	0.0267766	0.0155507	0.00975834
1168.9	0.0196423	0.0152744	-0.0056703
1169.45	0.00911304	0.0151405	0.00647697
1170	0.0478446	0.0151422	-0.0057156
1170.56	0.0117728	0.0152795	0.0118894
1171.11	0.0130799	0.0153432	0.0195116
1171.66	0.013235	0.0151323	-0.0189097
1172.21	0.044111	0.0150997	-0.0189971
1172.76	0.0300456	0.0147435	0.0107813
1173.32	0.0240663	0.0144926	-0.0343676
1173.87	0.0326298	0.014247	0.00978671
1174.42	0.0300063	0.0140981	-0.0284522
1174.97	0.00993355	0.0139539	-0.0102911
1175.52	0.0315477	0.0138245	0.00907694
1176.08	0.031103	0.0136765	-0.0001304
1176.63	0.00471585	0.0135952	-0.0201455
1177.18	0.0426513	0.013583	-0.0170235
1177.73	0.0107079	0.0135572	-0.005806
1178.28	0.0156046	0.0135217	-0.0207317
1178.84	0.0543426	0.0135913	-0.0199676
1179.39	0.00839495	0.0135749	-0.0269215
1179.94	0.0160482	0.0136127	-0.0251355
1180.49	0.0346846	0.0135728	-0.0084607
1181.04	-0.0044658	0.0135154	-0.0179139
1181.6	0.0144532	0.0134583	0.0113652
1182.15	0.0520397	0.0134329	0.00824974
1182.7	0.0423044	0.0134248	-0.007181
1183.25	0.00640156	0.0133949	-0.0216451
1183.8	0.0128296	0.0133237	-0.0299261
1184.36	-0.003737	0.0133441	-0.0327659
1184.91	0.0381974	0.0133101	-0.0188223
1185.46	0.0315683	0.013266	-0.0256278
1186.01	0.0414452	0.0132072	-0.0340356
1186.56	0.0359059	0.013238	-0.0411777
1187.12	0.0294289	0.0132109	-0.0049127
1187.67	0.0297627	0.0131909	-0.0448547
1188.22	0.0426549	0.0132657	0.00917508
1188.77	0.0255321	0.0133381	-0.0120797
1189.32	0.0469302	0.0133044	-0.0331055
1189.88	0.032641	0.0132124	-0.0345787
1190.43	0.0387718	0.0131497	-0.0388419
1190.98	0.0258894	0.0131913	0.0010758
1191.53	0.0361742	0.0132192	0.016862
1192.08	0.0339083	0.0132184	-0.0399018
1192.64	0.0203308	0.0132192	-0.015684
1193.19	0.0416903	0.0131502	-0.0162976
1193.74	0.0132505	0.013206	-0.0540407
1194.29	0.047729	0.0132882	-0.0337488
1194.84	0.0355115	0.0132515	-0.0079207
1195.4	0.0358818	0.0132994	-0.004464
1195.95	0.016582	0.0132737	-0.0318325
1196.5	0.0321394	0.0132694	-0.0441832
1197.05	0.0261916	0.0133263	-0.0047826
1197.6	0.0450489	0.0133471	-0.0095131
1198.16	0.042518	0.0132855	-0.0080088
1198.71	0.0384387	0.0132854	0.00748595
1199.26	0.00485392	0.013258	-0.0249862
1199.81	0.0323017	0.0131548	0.0165237
