# Supplementary material for: G protein subunit Gγ13-mediated signaling pathway is critical to the inflammation resolution and functional recovery of severely injured lungs
Source: eLife. 2024 Jun 5;12:RP92956. doi: 10.7554/eLife.92956 (PMC11152575; doi:10.7554/eLife.92956)
Supplement: Figure 3—figure supplement 1—source data 1. [file elife-92956-fig3-figsupp1-data1.xlsx]

## Sheet: Figure3-figure supplement 1
	WT			Trpm5 -/-			Gng13-cKO
Lung injury volume(mm3)	120.98	115.618	137.486	101.176	157.195	136.013	198.998	251.474	210.065
