# Supplementary material for: G protein subunit Gγ13-mediated signaling pathway is critical to the inflammation resolution and functional recovery of severely injured lungs
Source: eLife. 2024 Jun 5;12:RP92956. doi: 10.7554/eLife.92956 (PMC11152575; doi:10.7554/eLife.92956)
Supplement: Figure 3—figure supplement 2—source data 1. [file elife-92956-fig3-figsupp2-data1.xlsx]

## Sheet: Figure 3A
body weight change(100%)
day	WT						Gng13-cKO						Trpm5 -/-
0	100	100	100	100	100	100	100	100	100	100	100	100	100	100	100	100	100	100
2	94.44	98.83	100.94	101.2	98.64	102.59	88.92	87.29	94.7	80.17	100	98.69	99.86	101.32	100.42	100.98	100.78	101.9
4	91.04	96.32	97.42	97.88	94.89	104.4	80.54	77.14	86.97	73.6	94.39	92.04	95.16	100.24	97.08	105.07	98.26	101.9
6	87.44	85.18	87.37	85	89.22	101.69	74.42	70.56	76.16	67.09	85.16	83.91	84.58	87.62	86.58	96.06	91	100.74
8	80.69	80.11	82.84	81.97	77.51	85.46	70.88	68.26	72.17	63.52	70.98	71.43	81.02	84.88	81.69	80.77	76.83	90.41
10	78.27	82.09	82.9	83.11	75.54	90.47	68.62	67.43	71.71	62.37	70.12	65.81	81.59	84.59	82.65	83.19	82.23	83.82
12	83.68	100.82	100.06	102.69	87.37	101.97	74.03	60.54	70.6	62.05	74.79	63.14	97.72	98.19	102.15	96.29	95.5	94.1
14	95.62	102.45	102.64	105.21	95.01	108.96	83.05	61.75	78.26	65.56	85.39	63.2	102.42	103.03	106.14	101.67	101.32	102.48
16	99.07	103.97	105.03	101.37	100.99	107.44	91.88	63.35	86.25	70.79	95.86	69.68	103.42	101.96	105.37	106.89	106.42	105.54
18	104.38	104.43	109.24	106.18	98.95	106.37	104.38	72.67	99.67	76.08	93.48	71.32	108.11	105.92	109.6	102.73	105.4	102.9
20	102.16	102.39	106.22	104.12	100.43	110.15	103.48	74.65	100.46	77.61	97.38	73.94	106.31	103.91	108.17	103.71	106.96	105.48
22	104.12	105.08	106.1	106.64	101.54	110.48	107.67	79.76	107.33	82.33	96.29	76.17	107.31	105.04	109.9	106.21	108.88	107.8
24	107.47	111.32	107.35	109.39	106.35	109.64	110.18	81.35	107.01	86.93	98.33	78.68	108.63	106.8	111.09	106.81	115.07	108.59
25	109.89	112.96	110.14	109.39	113.06	112.91	111.53	82.65	107.97	89.02	101	80.48	110.35	107.89	114.01	109.39	113.57	107.64

## Sheet: Figure 3B
Survival rate
	day	WT	Gng13-cKO	Trpm5 -/-
	13	1
	25	0
	25	0
	25	0
	25	0
	25	0
	25	0
	25	0
	25	0
	25	0
	25	0
	25	0
	25	0
	25	0
	25	0
	25	0
	25	0
	25	0
	25	0
	25	0
	25	0
	25	0
	25	0
	25	0
	25	0
	25	0
	25	0
	25	0
	25	0
	25	0
	25	0
	25	0
	25	0
	25	0
	25	0
	25	0
	25	0
	25	0
	25	0
	25	0
	25	0
	25	0
	25	0
	25	0
	9		1
	9		1
	10		1
	10		1
	10		1
	10		1
	11		1
	11		1
	12		1
	25		0
	25		0
	25		0
	25		0
	25		0
	25		0
	25		0
	25		0
	25		0
	25		0
	25		0
	25		0
	25		0
	25		0
	25		0
	25			0
	25			0
	25			0
	25			0
	25			0
	25			0
	25			0
	25			0
	25			0
	25			0
	25			0
	25			0
	25			0
	25			0
	25			0
	25			0
	25			0

## Sheet: Figure 3D
	25dpi WT					25dpi TRPM5 -/-					25dpi Gng13-cKO
lung injury area (mm2)	16.229	22.717	31.329	31.742	35.174	21.682	24.218	36.011	41.535	45.977	56.477	78.506	92.669	108.065	119.424

## Sheet: Figure3-figure supplement 2B
Dclk1+ cells/mm2 Krt5+
14dpi WT	14dpi Trpm5-/-
0	0
8.48176	9.55772
3.00067	17.5418
2.81241	12.4493
7.11111	0
9.04886	10.8481
24.2571	0
0	0
0	0

## Sheet: Figure3-figure supplement 2D
Dclk1+ cells/mm2 Krt5+
25dpi WT	25dpi Trpm5-/-
85.2941	153.291
148.389	206.254
167.673	170.16
131.796	179.986
123.367	240.55
136.292	96.291
293.345	114.041
270.979	112.36
213.918	172.936

## Sheet: Figure3-figure supplement 2E
	Dclk1+ cells/mm2 Krt5+
day	WT									Trpm5-/-
14	0	8.48176	3.00067	2.81241	7.11111	9.04886	24.2571	0	0	0	9.55772	17.5418	12.4493	0	10.8481	0	0	0
25	85.2941	148.389	167.673	131.796	123.367	136.292	293.345	270.979	213.918	153.291	206.254	170.16	179.986	240.55	96.291	114.041	112.36	172.936

## Sheet: Figure3-figure supplement 2F
day	WT									Gng13-cKO
14	0	8.48176	3.00067	2.81241	7.11111	9.04886	24.2571	0	0	1.39938	4.23558	15.3016	0	6.36132	0	0	7.53432	0
20	83.5471	160.583	118.276	123.298	81.7372	77.0485	161.059	142.159	127.689	5.96459	47.6295	21.1557	3.15815	21.2784	0	22.3181	33.2388	0
25	85.2941	148.389	167.673	131.796	123.367	136.292	293.345	270.979	213.918	71.736	80.1425	108.108	31.5043	51.2328	54.4465	34.9922	31.8878	45.3858
50	76.412	136.364	107.649	120.68	123.36	93.9227	172.662	34.0557	48.4848	71.1744	57.4074	75.4098	52.7907	57.1429	67.8571	37.5	28.5714	52.9412

## Sheet: Figure3-figure supplement 2H
WT	Gng13-cKO
40.3846	0
36.3636	0
9	0
30.5026	0
28.352	0
26.8938	0
