# Supplementary material for: G protein subunit Gγ13-mediated signaling pathway is critical to the inflammation resolution and functional recovery of severely injured lungs
Source: eLife. 2024 Jun 5;12:RP92956. doi: 10.7554/eLife.92956 (PMC11152575; doi:10.7554/eLife.92956)
Supplement: Figure 3—source data 1. [file elife-92956-fig3-data1.xlsx]

## Sheet: Figure 3A
body weight change(100%)
day	WT						Gng13-cKO						Trpm5 -/-
0	100	100	100	100	100	100	100	100	100	100	100	100	100	100	100	100	100	100
2	94.44	98.83	100.94	101.2	98.64	102.59	88.92	87.29	94.7	80.17	100	98.69	99.86	101.32	100.42	100.98	100.78	101.9
4	91.04	96.32	97.42	97.88	94.89	104.4	80.54	77.14	86.97	73.6	94.39	92.04	95.16	100.24	97.08	105.07	98.26	101.9
6	87.44	85.18	87.37	85	89.22	101.69	74.42	70.56	76.16	67.09	85.16	83.91	84.58	87.62	86.58	96.06	91	100.74
8	80.69	80.11	82.84	81.97	77.51	85.46	70.88	68.26	72.17	63.52	70.98	71.43	81.02	84.88	81.69	80.77	76.83	90.41
10	78.27	82.09	82.9	83.11	75.54	90.47	68.62	67.43	71.71	62.37	70.12	65.81	81.59	84.59	82.65	83.19	82.23	83.82
12	83.68	100.82	100.06	102.69	87.37	101.97	74.03	60.54	70.6	62.05	74.79	63.14	97.72	98.19	102.15	96.29	95.5	94.1
14	95.62	102.45	102.64	105.21	95.01	108.96	83.05	61.75	78.26	65.56	85.39	63.2	102.42	103.03	106.14	101.67	101.32	102.48
16	99.07	103.97	105.03	101.37	100.99	107.44	91.88	63.35	86.25	70.79	95.86	69.68	103.42	101.96	105.37	106.89	106.42	105.54
18	104.38	104.43	109.24	106.18	98.95	106.37	104.38	72.67	99.67	76.08	93.48	71.32	108.11	105.92	109.6	102.73	105.4	102.9
20	102.16	102.39	106.22	104.12	100.43	110.15	103.48	74.65	100.46	77.61	97.38	73.94	106.31	103.91	108.17	103.71	106.96	105.48
22	104.12	105.08	106.1	106.64	101.54	110.48	107.67	79.76	107.33	82.33	96.29	76.17	107.31	105.04	109.9	106.21	108.88	107.8
24	107.47	111.32	107.35	109.39	106.35	109.64	110.18	81.35	107.01	86.93	98.33	78.68	108.63	106.8	111.09	106.81	115.07	108.59
25	109.89	112.96	110.14	109.39	113.06	112.91	111.53	82.65	107.97	89.02	101	80.48	110.35	107.89	114.01	109.39	113.57	107.64

## Sheet: Figure 3B
Survival rate
	day	WT	Gng13-cKO	Trpm5 -/-
	13	1
	25	0
	25	0
	25	0
	25	0
	25	0
	25	0
	25	0
	25	0
	25	0
	25	0
	25	0
	25	0
	25	0
	25	0
	25	0
	25	0
	25	0
	25	0
	25	0
	25	0
	25	0
	25	0
	25	0
	25	0
	25	0
	25	0
	25	0
	25	0
	25	0
	25	0
	25	0
	25	0
	25	0
	25	0
	25	0
	25	0
	25	0
	25	0
	25	0
	25	0
	25	0
	25	0
	25	0
	9		1
	9		1
	10		1
	10		1
	10		1
	10		1
	11		1
	11		1
	12		1
	25		0
	25		0
	25		0
	25		0
	25		0
	25		0
	25		0
	25		0
	25		0
	25		0
	25		0
	25		0
	25		0
	25		0
	25		0
	25			0
	25			0
	25			0
	25			0
	25			0
	25			0
	25			0
	25			0
	25			0
	25			0
	25			0
	25			0
	25			0
	25			0
	25			0
	25			0
	25			0

## Sheet: Figure 3D
	25dpi WT					25dpi TRPM5 -/-					25dpi Gng13-cKO
lung injury area (mm2)	16.229	22.717	31.329	31.742	35.174	21.682	24.218	36.011	41.535	45.977	56.477	78.506	92.669	108.065	119.424

## Sheet: Figure 3E
Lung wet/dry ratio
0dpi WT	0dpi Gng13-cKO	25dpi WT	25dpi Gng13-cKO
4.19879	4.14851	4.57645	5
4.16312	4.09091	4.75626	4.65412
4.13111	4.33333	4.57729	5.14739
4.32895	4.35484	4.65828	5.85484
4.3956	4.47753	4.47321	5.26655
4.39726	4.00327	4.5102	4.69733

## Sheet: Figure 3G
Dclk1+ cells/mm2 Krt5+
14dpi WT	14dpi Gng13-cKO
0	1.39938
8.48176	4.23558
3.00067	15.3016
2.81241	0
7.11111	6.36132
9.04886	0
24.2571	0
0	7.53432
0	0

## Sheet: Figure 3I
Dclk1+ cells/mm2 Krt5+
20dpi WT	20dpi GNG13-cKO
83.5471	5.96459
160.583	47.6295
118.276	21.1557
123.298	3.15815
81.7372	21.2784
77.0485	0
161.059	22.3181
142.159	33.2388
127.689	0

## Sheet: Figure 3K
Dclk1+ cells/mm2 Krt5+
25dpi WT	25dpi Gng13-cKO
85.2941	71.736
148.389	80.1425
167.673	108.108
131.796	31.5043
123.367	51.2328
136.292	54.4465
293.345	34.9922
270.979	31.8878
213.918	45.3858

## Sheet: Figure 3M
Dclk1+ cells/mm2 Krt5+
50dpi WT	50dpi Gng13-cKO
76.412	71.1744
136.364	57.4074
107.649	75.4098
120.68	62.7907
123.36	57.1429
93.9227	67.8571
172.662	47.5
34.0557	28.5714
48.4848	52.9412
