# Supplementary material for: G protein subunit Gγ13-mediated signaling pathway is critical to the inflammation resolution and functional recovery of severely injured lungs
Source: eLife. 2024 Jun 5;12:RP92956. doi: 10.7554/eLife.92956 (PMC11152575; doi:10.7554/eLife.92956)
Supplement: Figure 4—figure supplement 1—source data 1. [file elife-92956-fig4-figsupp1-data1.xlsx]

## Sheet: Figure 4-figure supplement 1
	Relative mRNA expression
	0dpi WT			0dpi Gng13-cKO			25dpi WT			25dpi Gng13-cKO
Gsdma	7.2442e-07	7.2442e-07	1.3898e-06	9.8049e-07	9.8049e-07	9.8049e-07	6.6047e-07	1.142e-06	6.6047e-07	4.2621e-06	2.7541e-06	1.0955e-06
Gsdma2	7.2442e-07	7.2442e-07	7.2442e-07	9.8049e-07	9.8049e-07	9.8049e-07	6.6047e-07	6.6047e-07	6.6047e-07	4.5112e-07	4.5112e-07	4.5112e-07
Gsdma3	3.8501e-06	1.6875e-06	7.2442e-07	9.8049e-07	1.4556e-06	1.5069e-06	6.6047e-07	6.6047e-07	1.1988e-06	1.8942e-06	3.2752e-06	1.4158e-06
Gsdmc	7.2442e-07	7.2442e-07	7.2442e-07	9.8049e-07	9.8049e-07	9.8049e-07	6.6047e-07	6.6047e-07	6.6047e-07	4.5112e-07	4.5112e-07	1.7796e-06
Gsdmc2	7.2442e-07	1.0533e-06	7.2442e-07	9.8049e-07	9.8049e-07	9.8049e-07	3.2078e-06	2.6603e-06	1.3866e-06	2.989e-05	2.5309e-05	3.3627e-05
Gsdmc3	9.5588e-07	7.2442e-07	7.2442e-07	1.0221e-06	1.4657e-06	1.0729e-06	1.2742e-05	1.3192e-05	1.3284e-05	1.9995e-05	2.8474e-05	2.5485e-05
Gsdmc4	5.9997e-06	8.4849e-06	7.2849e-06	8.8862e-06	7.3695e-06	9.8599e-06	1.0067e-05	1.1016e-05	9.5903e-06	1.2394e-05	7.7897e-06	2.6974e-06
Gsdmd	0.00284636	0.00298787	0.00278778	0.00315094	0.00306478	0.00310756	0.00326206	0.00340059	0.00321715	0.00387927	0.00377319	0.00401607
Gsdme	0.00018038	0.00016257	0.0001538	0.00017996	0.00017026	0.00017504	0.00022466	0.00023258	0.00023258	0.00027278	0.00025806	0.00025986
