# Supplementary material for: G protein subunit Gγ13-mediated signaling pathway is critical to the inflammation resolution and functional recovery of severely injured lungs
Source: eLife. 2024 Jun 5;12:RP92956. doi: 10.7554/eLife.92956 (PMC11152575; doi:10.7554/eLife.92956)
Supplement: Figure 4—source data 1. [file elife-92956-fig4-data1.xlsx]

## Sheet: Figure 4B
CD64+ cells/mm2
20dpi WT	20dpi Gng13-cKO	25dpi WT	25dpi Gng13-cKO
236.835	682.792	138.574	458.554
342.656	463.593	274.628	415.722
304.863	526.581	269.589	224.238
236.835	566.893	204.082	231.796
297.304	609.725	206.601	367.851
211.64	546.737	183.925	360.292

## Sheet: Figure 4C
Relative mRNA expression
	0dpi WT			0dpi Gng13-cKO			25dpi WT			25dpi Gng13-cKO
Gsdmd	0.994985	1.03724	0.967777	1.09638	1.07382	1.07382	1.14294	1.17507	1.11942	1.35919	1.30382	1.3974
Gsdme	1.09418	0.979322	0.926495	1.08663	1.03516	1.04961	1.3659	1.3946	1.4043	1.65847	1.54741	1.56901
Tlr4	0.988382	0.988382	1.02324	1.00915	1.02324		1.1512	1.11972	1.12751	1.1918	1.24241	1.23383
Nlrp3	1.07416	1.05937	0.866464	1.08916	1.11978	1.02329	1.3882	1.34091	1.37861	1.61688	1.55101	1.61688
Asc	1.01148	1.01148	0.97703	1.17811	1.16189	1.16997	1.96765	1.92716	1.8875	2.47336	2.21372	2.47336
Casp1	0.787575	1.12155	1.09088	1.20204	1.14511	1.05372	2.6675	2.54116	2.50618	3.72048	3.42354	3.35309
IL-1β	0.990764	1.01158	0.997655	1.0767	1.04725	1.06187	2.34017	2.30795	2.29201	4.21816	4.18902	4.2475

## Sheet: Figure 4E
	Relative protein level
	20dpi WT				20dpi Chat-Cre:Gng13f/f				25dpi WT				25dpi Chat-Cre:Gng13f/f
NLRP3	0.375218	0.214605	0.315176	0.25757	0.70138	0.581497	0.477636	0.643396	0.10132	0.0902087	0.138419	0.0978439	0.407494	0.282779	0.26788	0.178138
Gsdmd-FL	0.859412	0.914975	0.641051	0.813743	1.12543	1.28254	0.861847	1.01271	0.70261	0.78223	0.475842	0.597909	0.84313	0.88694	0.635327	0.611704
Gsdmd-N	0.436819	0.434116	0.263058	0.293186	0.965121	0.756306	0.63884	0.675767	0.363416	0.279158	0.214775	0.175375	0.57484	0.54435	0.313343	0.259947
pro-Casp-1	0.565848	0.528976	0.444715	0.424944	0.635019	0.615195	0.573796	0.549112	0.306327	0.262809	0.261859	0.230387	0.590795	0.487351	0.424826	0.418354
Cleaved casp-1 (p20)	0.660792	0.538849	0.526437	0.525652	0.764797	0.632543	0.626764	0.602517	0.554626	0.466325	0.430291	0.423741	0.604626	0.566325	0.530291	0.473741
IL-1β	0.11	0.165585	0.170436	0.188721	0.38	0.474516	0.487361	0.533915	0.09	0.112092	0.152802	0.154828	0.18308	0.341226	0.363095	0.50367
