# Supplementary material for: G protein subunit Gγ13-mediated signaling pathway is critical to the inflammation resolution and functional recovery of severely injured lungs
Source: eLife. 2024 Jun 5;12:RP92956. doi: 10.7554/eLife.92956 (PMC11152575; doi:10.7554/eLife.92956)
Supplement: Figure 5—figure supplement 1—source data 1. [file elife-92956-fig5-figsupp1-data1.xlsx]

## Sheet: Figure 5-figure supplement 1B 
Gsdme+ cells/mm2
25dpi WT	25dpi Gng13-cKO
33.8189	57.232
39.0219	88.4495
70.2393	127.471
44.2248	124.87
78.0437	93.6524
101.457	119.667
75.4422	75.4422
23.4131	80.6452
28.616	59.8335
28.616	41.6233
46.8262	31.2175
31.2175	28.616

## Sheet: Figure 5-figure supplement 1D
Caspase-3+ cells/mm2
25dpi WT	25dpi Gng13-cKO
22.6757	256.992
40.3124	216.679
47.871	264.55
93.2225	224.238
80.6248	393.046
78.1053	292.265
100.781	221.857
