# Supplementary material for: G protein subunit Gγ13-mediated signaling pathway is critical to the inflammation resolution and functional recovery of severely injured lungs
Source: eLife. 2024 Jun 5;12:RP92956. doi: 10.7554/eLife.92956 (PMC11152575; doi:10.7554/eLife.92956)
Supplement: Figure 5—source data 1. [file elife-92956-fig5-data1.xlsx]

## Sheet: Figure 5B
Gsdmd+ cells/mm2
25dpi WT	25dpi Gng13-cKO
36.4204	299.168
96.2539	137.877
70.2393	169.095
46.8262	140.479
117.066	176.899
67.6379	223.725
109.261	309.573
153.486	179.501
57.232	184.703
104.058	169.095
93.6524	96.2539
106.66	83.2466

## Sheet: Figure 5E
IL-1b+ cells/mm2
25dpi WT	25dpi Gng13-cKO
62.435	205.515
91.051	101.457
59.8335	247.138
67.6379	257.544
49.4277	83.2466
39.0219	122.269
85.8481	184.703
78.0437	171.696
91.051	124.87
28.616	111.863
46.8262	132.674
57.2321	96.2539
