# Supplementary material for: G protein subunit Gγ13-mediated signaling pathway is critical to the inflammation resolution and functional recovery of severely injured lungs
Source: eLife. 2024 Jun 5;12:RP92956. doi: 10.7554/eLife.92956 (PMC11152575; doi:10.7554/eLife.92956)
Supplement: Figure 6—source data 1. [file elife-92956-fig6-data1.xlsx]

## Sheet: Figure 6B
Sytox+ cells/mm2
20dpi WT	20dpi Gng13-cKO	25dpi WT	25dpi Gng13-cKO
80.6248	219.199	42.8319	95.742
199.043	246.914	85.6639	98.2615
100.781	209.121	55.4296	146.132
60.4686	272.109	35.2734	80.6248
70.5467	168.808	65.5077	65.5077
62.9882	151.172	88.1834	90.703
