# Supplementary material for: G protein subunit Gγ13-mediated signaling pathway is critical to the inflammation resolution and functional recovery of severely injured lungs
Source: eLife. 2024 Jun 5;12:RP92956. doi: 10.7554/eLife.92956 (PMC11152575; doi:10.7554/eLife.92956)
Supplement: Figure 7—source data 1. [file elife-92956-fig7-data1.xlsx]

## Sheet: Figure 7A
BALF cell number (x10 6)
0dpi WT	0dpi Gng13-cKO	25dpi WT	25dpi Gng13-cKO
0.26	0.545	1.5	1.45
0.18	0.35	0.5	2.13
0.11	0.52	0.8	1.16
0.17	0.4	0.41	4.63
0.22	0.24	1.42	1.3
0.45	0.21	0.92	5.11

## Sheet: Figure 7B
BALF protein conc (mg/mL)
0dpi WT	0dpi Gng13-cKO	20dpi WT	20dpi Gng13-cKO	25dpi WT	25dpi Gng13-cKO
0.339463	0.287847	0.662525	1.24203	0.428427	1.3335
0.351379	0.374653	0.728794	1.29886	0.480285	1.58863
0.362657	0.378125	0.854217	1.92478	0.485255	1.60848
0.363544	0.322569	0.908484	2.45494	0.535335	1.81395
0.39193	0.280903	1.26723	3.17234	0.679092	1.9382

## Sheet: Figure 7C
BALF LDH (U/L)
0dpi WT			0dpi Gng13-cKO			20dpi WT			20dpi Gng13-cKO			25dpi WT			25dpi Gng13-cKO
32.3744	29.338	39.7436	32.9384	30.0857	33.4894	80.2576	73.1715	68.15	93.6869	90.2381	91.1034	54.604	44.8481	59.8989	71.7978	73.7252	83.6842

## Sheet: Figure 7D
BALF IL-1b (pg/mL)
0dpi WT				0dpi Gng13-cKO				20dpi WT				20dpi Gng13-cKO				25dpi WT				25dpi Gng13-cKO
1.2813	3.27318	3.68081	6.15665	1.50547	3.45084	4.99894	3.4358	44.1197	47.922	32.0616	31.1747	63.6309	67.8885	99.2302	71.5432	25.3538	13.9895	19.5455	29.2442	69.3487	111.455	75.9087	71.7666
