# Supplementary material for: G protein subunit Gγ13-mediated signaling pathway is critical to the inflammation resolution and functional recovery of severely injured lungs
Source: eLife. 2024 Jun 5;12:RP92956. doi: 10.7554/eLife.92956 (PMC11152575; doi:10.7554/eLife.92956)
Supplement: Figure 8—source data 1. [file elife-92956-fig8-data1.xlsx]

## Sheet: Figure 8A
	Relative mRNA expression
	0dpi WT			0dpi Gng13-cKO			25dpi WT			25dpi Gng13-cKO			50dpi WT			50dpi Gng13-cKO
Col1a1	1.00652	0.999467	0.99401	0.939296	1.11639	1.12829	1.21554	1.34308	1.56408	2.4076	2.43856	2.40559	1.20579		1.17385	1.31965	1.24371	1.28061
Fn1	1.30052	0.831263	0.868217	1.1251	1.03397	1.10841	1.47082	1.65186	2.06106	2.61254	2.61334	2.66954	1.1238		1.09509	1.59281	1.5501	1.43365
Timp1	1.27585	0.881846	0.842305	0.970962	1.09995	1.1998	1.71532	1.95931	2.40692	5.18143	5.00095	5.32317	1.75602		1.40262	2.70045	2.63411	2.66029

## Sheet: Figure 8C
Percentage of collagen content
0dpi WT	0dpi Gng13-cKO	25dpi WT	25dpi Gng13-cKO	50dpi WT	50dpi Gng13-cKO
0.702165	2.14961	4.18582	11.7124	1.12	32.6153
1.07595	1.1544	7.70659	22.654	6.50991	23.7686
2.50417	4.6528	35.107	14.456	2.08967	25.7267
6.01676	2.12255	21.8329	33.185	4.30169	29.8194
6.8038	5.6338	10.4682	13.0651	5.96095	9.23886
0.901804	2.30117	17.4304	15.7793	12.4621	11.6523
8.10185	1.05263	6.22035	32.429	4.03361	11.1851
3.156	2.99145	2.90323	46.3292	21.5593	13.5626
9.04317	4.42211	7.90794	22.939	2.76586	7.23562
0.030143	4.48833	13.4465	24.9676	5.84862	6.44044
0.029251	3.07132	9.19732	51.1172	13.6185	5.10681
0.031968	3.27078	10.842	26.4003	14.8902	3.46598
